# Supplementary material for: Neoplastic and Stromal Cells Contribute to an Extracellular Matrix Gene Expression Profile Defining a Breast Cancer Subtype Likely to Progress
Source: PubMed Central journal article supplement (PMC3575489; doi:10.1371/journal.pone.0056761), 2013-02-18
Supplement: pone.0056761.s013.pdf [file pone.0056761.s013.pdf]

# **Supplementary material**

## **Stability analysis of the ECM3 cluster**

Neoplastic and stromal cells contribute to  
an extracellular matrix gene expression profile  
defining a breast cancer subtype likely to progress

Triulzi T, Casalini P, Sandri M, Ratti M, Carcangiu ML,  
Colombo MP, Balsari A, Ménard S, Orlandi R and Tagliabue E.

# 1 Statistical methods used for ECM3 stability analysis

## 1.1 Missing value imputation

Missing expression values were imputed using the nearest-neighbor averaging method described in [Troyanskaya *et al.* (2001)] and implemented in the `knn.impute` command of the `impute` R package [Hastie *et al.* (2011)].

The number of neighbors used in the imputation was `k=10`, the maximum percent missing data allowed in any row was `rowmax=0.50`, the maximum percent missing data allowed in any column was `colmax=0.13` and the largest block of genes imputed using the `knn` algorithm was `maxp = 1500`.

## 1.2 Data preprocessing

Microarray data matrices were preprocessed using a method similar to the algorithm described in [Kluger *et al.* (2003)]: (a) transform data using using the tail function  $\text{sign}(x)\ln(1 + |x|)$ , where  $|x|$  is the absolute value of  $x$ , (b) perform 5 cycles of row-column standardization.

## 1.3 Clustering algorithms

For the identification of the ECM3 cluster, three biclustering algorithms were used: the independent row-column clustering (IRCC) based on k-means clustering, a modification of the IRCC clustering based on column clustering of a selected submatrix (CCSS) and the Large Average Submatrix (LAS) method proposed in [Shabalin *et al.* (2009)].

LAS is an iterative algorithm based on a simple significance score that trades off between the size of a submatrix and its average value. It identifies groups of genes that show similar activity patterns under a specific subset of the experimental conditions. This algorithm is implemented in the LAS program available at <https://genome.unc.edu/las/>. We searched bicluster with positive score setting the number of iterations to 10000, the score cut-off to 0 and the maximum number of biclusters to 30. We defined the ECM3 bicluster as the LAS submatrix with the SPARC gene in one (or more) of the rows and with the highest positive score.

The IRCC algorithm applies k-means clustering independently to the rows and the columns of the data matrix  $X$ , finds the row clusters  $rC_i, i = 1, 2, \dots, k_r$  and the column clusters  $cC_j, j = 1, 2, \dots, k_c$ , then reorders rows and columns so that each cluster forms a contiguous group and finally builds biclusters at the intersection of the row clusters with the column clusters. The ECM3 bicluster is identified as follows: (a) find the row cluster  $rC_i$  that contains the SPARC gene; (b) consider the biclusters  $B_1, \dots, B_{k_c}$  defined by the intersection of  $rC_i$  with the column clusters  $cC_1, \dots, cC_{k_c}$ ; (c) ECM3 is the bicluster  $B_j$  with the highest positive mean expression value.

The CCSS algorithm starts applying k-means clustering to the rows of  $X$  (genes), finds the row clusters  $rC_i, i = 1, 2, \dots, k_r$ , selects the row cluster  $rC_i$  that contains the SPARC gene and finally applies k-means column clustering to the submatrix  $X_{rC_i}$  of  $X$  whose rows belong to  $rC_i$ . In other words, CCSS does not apply k-means clustering independently to the rows and the columns of the data matrix but applies column clustering to a subset of rows that has been selected by a previous row clustering. The column cluster with the highest positive mean expression value identifies the ECM3 bicluster.

The number of row and column clusters in IRCC were set to 4 for all the analyzed datasets, with the only exception of the Ma *et al.* (2004) dataset (GDS806) where the rows and the columns were partitioned in 5 and 3 groups, respectively. k-means clustering was performed using the `kmeans` R command. The maximum number of iterations allowed was `iter.max=30`, the number of random starts was `nstart=20` and the algorithm of Hartigan and Wong was selected (`algorithm = "Hartigan-Wong"`). Using these settings we were able to find IRCC biclusters that are very similar to LAS biclusters.

In CCSS the number of row clusters was set to 4 (with the exception of Ma et al. (2004) dataset (GDS806) where  $k=5$ ) and the number of column clusters were selected adaptively using two approaches: the consensus clustering of [Monti *et al.* (2003)] and the prediction strength of [Tibshirani *et al.* (2005)]. The two methods gives similar results for all the analyzed datasets.

Prediction strength was calculated using the `prediction.strength` command of the `fpc` R package [Hennig (2010)], applying the k-means clustering algorithm (`method="kmeans"`), with  $k$  ranging from 2 to 7 (`Gmin=2`, `Gmax=7`) and with a number of times the dataset is divided into two halves equal to  $M=200$ .

Consensus clustering is a resampling-based approach to cluster stability implemented in the R package `ConsensusClusterPlus` (see [Wilkerson (2011)] and [Wilkerson and Hayes (2010)]). The adopted clustering algorithm was k-means (`clusterAlg="km"`), with `distance = "euclidean"`. The maximum cluster number was set to `maxK = 7` and the number of subsamples to `reps = 500`. The proportion of items to sample was `pItem=0.5` and the proportion of features to sample was `pFeature = 1`. See the next section for a brief description of the method.

## 1.4 Stability analysis

## 1.5 Using different clustering methods

The stability of the ECM3 partition was first evaluated with respect to the use of different clustering algorithms. Row and column elements of the ECM3 bicluster obtained from LAS were compared to row and column elements of IRCC and CCSS. We assessed the similarity between these partitions of the same dataset using the Jaccard index defined as:

$$\gamma(C_1, C_2) = \frac{|C_1 \cap C_2|}{|C_1 \cup C_2|}, \quad (1)$$

where  $C_1$  and  $C_2$  are two (row or column) partitions and  $|C|$  is the number of elements in the  $C$  partition. This index ranges from 0 (no common elements in the  $C_1$  and  $C_2$  partitions) to 1 (the elements in the  $C_1$  and  $C_2$  partitions are exactly the same). For details see [Hennig (2007)]. The Jaccard index was calculated using the `clujaccard` command of the `fpc` R packages.

## 1.6 Removing genes or samples

The stability of the ECM3 cluster was also evaluated comparing the results from clustering on the full data to clustering based on:

- removing one gene at a time;
- removing one sample at a time;
- repeatedly and randomly removing  $B$  sets of  $k$  genes, where  $k = 2/3 \cdot n_r$ ,  $n_r$  is the number of rows (genes) and  $B = 1000$ .

At each step, after removing one sample or one gene or a set of genes, the partitioning calculated on the full dataset was compared to the partitioning on the reduced dataset and the Jaccard index was calculated. Finally, the histogram and some descriptive statistics about the distribution of the  $B$  Jaccard indexes were estimated.

When removing one gene at a time, four additional stability measures were estimated using the `stability` command of the `clValid` R package: average proportion of non-overlap (APN), average distance (AD), average distance between means (ADM) and figure of merit (FOM). The APN measures the average proportion of observations not placed in the same cluster under both cases (i.e. before

and after gene removal). The APN is in the interval  $[0, 1]$ . Values close to 0 indicate highly consistent clustering results. The AD measures the average distance between observations placed in the same cluster under both cases and the ADM measures the average distance between cluster centers for observations placed in the same cluster under both cases. These measures have values between zero and  $\infty$ . Smaller values are preferred. The FOM measures the average intra-cluster variance of the observations in the deleted columns (averaged over all removed columns), where the clustering is based on the remaining (undeleted) columns. FOM has values between zero and  $\infty$  and should be minimized.

Using the `stability` command of the `clValid` R package with `clMethods = "kmeans"`, `metric = "euclidean"`, `iter.max = 30` and `nstart = 10` we estimated the above stability measures varying the number of cluster from 2 to 6 (`nClust = 2:6`) and removing one column at a time.

## 1.7 Bootstrapping, jittering, adding noise points

In addition, following [Hennig (2007)], we investigated whether the ECM3 cluster remains stable:

- for different data sets drawn from the same underlying distribution (bootstrapping);
- under the addition of a random error to every point of the data set (jittering);
- under the replacement of some point in the data set by "noise points" or outliers.

Data were bootstrapped, jittered and noise points were added producing modified datasets for  $B$  times. At each step, the partitioning calculated on the full dataset was compared to the partitioning on the modified dataset and the Jaccard index was calculated. Finally, the histogram and some descriptive statistics about the distribution of the  $B$  Jaccard indexes were estimated.

This analysis was performed on the submatrix of  $X$  identified by the ECM3 genes. The `clusterboot` command of the `fpc` R package was used with the following parameters: `B = 1000`, `bootmethod = c("boot", "jitter", "noise")`, `clustermethod = kmeansCBI`, `runs = 10`, `jittertuning = 0.1`, `noisetuning = c(0.1, 4)`. The number of cluster  $k$  was set equal to the number of clusters of the CCSS algorithm.

The stability of the discovered ECM3 cluster with respect to sampling variability was also assessed using consensus clustering [Monti *et al.* (2003)]. Working in conjunction with resampling techniques for simulating perturbations of the original data, it provides for a method to represent the consensus across multiple runs of a clustering algorithm. Consensus clustering is based on the notions of connectivity matrix and consensus matrix. Let  $X^{(1)}, \dots, X^{(B)}$  be a collection of perturbed data set obtained by resampling the original  $X$  matrix. The connectivity matrix  $M^{(b)}$  corresponding to the  $b$ th dataset is a  $N \times N$  matrix whose entries are defined as follows:  $M^{(b)}(i, j) = 1$  if items  $i$  and  $j$  belong to the same cluster and  $M^{(b)}(i, j) = 0$  otherwise. The consensus matrix  $\mathcal{M}$  is a  $N \times N$  matrix is a properly normalized sum of the connectivity matrices of all the perturbed data sets  $\{X^{(b)} : b = 1, 2, \dots, H\}$ . Its entries are defined as follows:  $\mathcal{M}(i, j) = \sum_b M^{(b)}(i, j) / \sum_b I^{(b)}(i, j)$ , where  $I^{(b)}(i, j)$  is an  $(N \times N)$  indicator matrix such that its  $(i, j)$ -th entry is equal to 1 if both items  $i$  and  $j$  are present in the dataset  $X^{(b)}$ , and 0 otherwise.

In other words, a consensus matrix is a matrix that stores, for each pair of items, the proportion of clustering runs in which two items are clustered together. The consensus matrix is used as a visualization tool to help assess the clusters' composition and the number of clusters. Associating a color gradient to the 0-1 range of real numbers of  $\mathcal{M}$ , so that white corresponds to 0, and dark blue corresponds to 1, and arranging  $\mathcal{M}$  so that items belonging to the same cluster are adjacent to each other (with the same item order used to index both the rows and the columns of the matrix), a matrix corresponding to perfect consensus will be displayed as a color-coded heat map characterized by blue blocks along the diagonal, on a white background.

Plotting a histogram of a consensus matrix entries (i.e., a histogram of the  $N(N - 1)/2$  entries  $\mathcal{M}(i, j)$ 's for  $i < j$ ), perfect consensus would translate into two bins centered at 0 and 1. Plotting the corresponding empirical cumulative distribution (CDF) defined over the range  $[0, 1]$ , perfect consensus would translate into a step function with a step around 0 (the magnitude of which is equivalent to the proportion of 0's in the matrix), a flat line reaching across the 0-1 range, and a second step around 1. For more details, see [Handl *et al.* (2005)].

## 1.8 Internal validation

The internal validation of the ECM3 cluster was performed evaluating measures that reflect the compactness, connectedness, and separation of the cluster partitions.

The Dunn index and silhouette width are measures that combine compactness and separation. The Dunn index is the ratio of the smallest distance between observations not in the same cluster to the largest intra-cluster distance. It has a value between zero and  $\infty$  and should be maximized. The silhouette value measures the degree of confidence in the assignment of a particular observation to a cluster. If silhouette value is close to 1, it means that sample is 'well-clustered' and it was assigned to a very appropriate cluster. If silhouette value is about zero, it means that that sample could be assign to another closest cluster as well, and the sample lies equally far away from both clusters. If silhouette value is close to  $-1$ , it means that sample is 'misclassified' and is merely somewhere in between the clusters. The silhouette width of a cluster is the average of the silhouette values of each observation in the cluster. It lies in the interval  $[-1, 1]$  and should be maximized. For more details see [Brock *et al.* (2008)].

Connectedness measures to what extent a partitioning places observations in the same cluster as their nearest neighbors in the data space, and is measured by connectivity. Connectivity has a value between zero and  $\infty$  and should be minimized [Brock *et al.* (2008)].

The Dunn index and connectivity of ECM3 were calculated using the `dunn` and `connectivity` commands of the `clValid` R package [Brock *et al.* (2011)]. The size of the neighborhood was `neighborSize = 10` and the metric used to determine the distance matrix was `method = "euclidean"`. The silhouette widths were calculated and plotted using the `silhouette` command of the `cluster` R package [Maechler *et al.* (2005)].

Using the `stability` command of the `clValid` R package with `clMethods = "kmeans"`, `metric = "euclidean"`, `iter.max = 30` and `nstart = 10` we estimated the above internal measures varying the number of cluster from 2 to 6 (`nClust=2:6`) and removing one column at a time.

## 1.9 Statistical significance

An important question about clustering is the need to decide if a given cluster is actually present in the data or if it is an artifact of the natural sampling variation. In our work the statistical significance of the ECM3 cluster was assessed using the SigClust method proposed in [Liu *et al.* (2008)] and implemented in the `sigclust` R package [Huang *et al.* (2010)]. This approach is based on the two-means cluster index (CI), a measure of data non-Gaussianity, defined as the ratio between the within-group sum of squared distances to group means and the overall sum of squared distances to the overall mean:

$$CI = \frac{\sum_{j \in C_1} \|\mathbf{x}_j - \bar{\mathbf{x}}^{(1)}\|^2 + \sum_{j \in C_2} \|\mathbf{x}_j - \bar{\mathbf{x}}^{(2)}\|^2}{\sum_{j=1}^n \|\mathbf{x}_j - \bar{\mathbf{x}}\|^2}, \quad (2)$$

where  $C_1$  and  $C_2$  denote the two clusters,  $\bar{\mathbf{x}}^{(1)}$  and  $\bar{\mathbf{x}}^{(2)}$  represent the mean of the  $C_1$  and  $C_2$  clusters and  $\bar{\mathbf{x}}$  is the overall mean. The smaller the CI, the larger the proportion of the overall variance that is explained by clustering.

Using a large number of simulations, the SigClust method obtain an empirical distribution of the CI based on the null hypothesis of absence of clusters and calculate a p-value for the value of CI calculated on the original data set.

In the present study the number of simulations was `nsim = 1000` and covariance was estimated by the original background noise thresholded estimate ('hard thresholding', `icovest=3`).

## 1.10 Informative genes

The importance of genes in predicting the ECM3 partitioning was estimated using the method based on random forests [Breiman (2001)] and implemented in the `party` R package [Hothorn *et al.* (2006)].

For each dataset we started fitting a conditional random forests with `ntree = 5000` trees using the `cforest` command. The outcome was the ECM3 sample partitioning found by LAS and the covariates are the genes. The number of randomly preselected variables was set equal to the square root of the number of genes, i.e. `mtry = round(sqrt(nrow(X)))`, as suggested in [Genuer *et al.* (2008)] for high dimensional classification problems. Other settings for the random forests were: `teststat = "quad"`, `testtype = "Bonferroni"`, `mincriterion = 0.90`, `replace = F`, `fraction = 0.632`, `minsplit=5`, `maxsurrogate = 0` and `maxdepth = 0`.

After fitting random forests, the unconditional 'mean decrease in accuracy' importance was estimated using the `varimp` command of `party`. Negative importances were set to zero. A bar plot of the first 50 most informative genes were plotted.

It is interesting to compare this list of informative genes with the consensus list that we found using the COSA algorithm of [Friedman and Meulman (2004)]. A good agreement between the two lists suggests a good stability of the proposed ECM3 consensus list.

## References

- [Breiman (2001)] Breiman (2001), Random Forests, *Machine Learning*, 45(1), 5–32
- [Brock *et al.* (2008)] Brock G., Pihur V., Datta S. and Datta S. (2005), `clValid`, an R package for cluster validation, *Journal of Statistical Software*, 25(4). URL <http://www.jstatsoft.org/v25/i04>
- [Brock *et al.* (2011)] Brock G., Pihur V., Datta S. and Datta S. (2005), `clValid`: Validation of Clustering Results, *R package version 0.6-2*, 25(4). URL <http://CRAN.R-project.org/package=clValid>
- [Friedman and Meulman (2004)] Friedman J. and Meulman J.J. (2004), Clustering objects on subsets of attributes, *Journal of the Royal Statistical Society B*, 66(4), 815–849
- [Genuer *et al.* (2008)] Genuer R., Poggi J-M. and Tuleau C. (2005), Random Forests: some methodological insights, arXiv:0811.3619v1
- [Handl *et al.* (2005)] Handl J., Knowles J. and Kell D.B (2005), Computational cluster validation in post-genomic data analysis, *Bioinformatics*, 21(15), 3201–3212
- [Hastie *et al.* (2011)] Hastie T., Tibshirani R., Narasimhan B. and Chu G. (2011), `impute`: Imputation for microarray data, *R package version 1.26.0*, URL <http://CRAN.R-project.org/package=impute>
- [Hennig (2007)] Hennig C. (2007), Cluster-wise assessment of cluster stability, *Computational Statistics & Data Analysis*, 52, 258–271
- [Hennig (2010)] Hennig C. (2010), `fpc`: Flexible procedures for clustering, *R package version 2.0-3*, URL <http://CRAN.R-project.org/package=fpc>

- [Hothorn *et al.* (2006)] Hothorn T., Buehlmann P., Dudoit S., Molinaro A. and Van Der Laan M. (2006), Survival Ensembles, *Biostatistics*, 7(3), 355–373
- [Huang *et al.* (2010)] Huang H., Liu Y. and Marron J.S. (2010), sigclust: Statistical Significance of Clustering, *R package version 1.0.0*, URL <http://CRAN.R-project.org/package=sigclust>
- [Kluger *et al.* (2003)] Kluger Y., Basri R., Chang J.T., and Gerstein M. (2003), Spectral Biclustering of Microarray Data: Coclustering Genes and Conditions, *Genome Research*, 13, 703–716
- [Liu *et al.* (2008)] Liu Y, Hayes D.N., Nobel A. and Marron J.S. (2008), Statistical Significance of Clustering for High-Dimension, Low-Sample Size Data, *Journal of the American Statistical Association*, 103(483), 1281–1293
- [Madeira and Oliveria (2004)] Madeira S.C. and Oliveria A.L. (2004), Biclustering Algorithms for Biological Data Analysis: A Survey, *IEEE Transactions on Computational Biology and Bioinformatics*, 1(1), 24–45
- [Maechler *et al.* (2005)] Maechler M., Rousseeuw P., Struyf A. and Hubert M. (2005). Cluster Analysis Basics and Extensions, *Unpublished*
- [Monti *et al.* (2003)] Monti S., Tamayo P., Jill M. and Golub T. (2003), Consensus Clustering: A Resampling-Based Method for Class Discovery and Visualization of Gene Expression Microarray Data, *Machine Learning*, 52(1-2), 91–118
- [Shabalín *et al.* (2009)] Shabalín A.A., Weigman V.J., Perou C.M. and Nobel A.B. (2009), Finding Large Average Submatrices in high dimensional data, *The Annals of Applied Statistics*, 3(3), 985–1012
- [Tibshirani *et al.* (2005)] Tibshirani, R. and Walther, G. (2005), Cluster Validation by Prediction Strength, *Journal of Computational and Graphical Statistics*, 14, 511–528
- [Troyanskaya *et al.* (2001)] Troyanskaya O., Cantor M., Sherlock G., Brown P., Hastie T., Tibshirani R., Botstein D. and Altman R.B. (2001), Missing value estimation methods for DNA microarrays, *Bioinformatics*, 17(6), 520–525
- [Wilkerson (2011)] Wilkerson M.D. (2011), ConsensusClusterPlus, *R package version 1.5.1*, URL <http://www.bioconductor.org/packages/2.6/bioc/html/ConsensusClusterPlus.html>
- [Wilkerson and Hayes (2010)] Wilkerson M.D. and Hayes D.N. (2003), ConsensusClusterPlus: a class discovery tool with confidence assessments and item tracking, *Bioinformatics*, 26(12), 1572–1573

## 2 Van'T Veer et al (2002) dataset

### 2.1 LAS bicluster

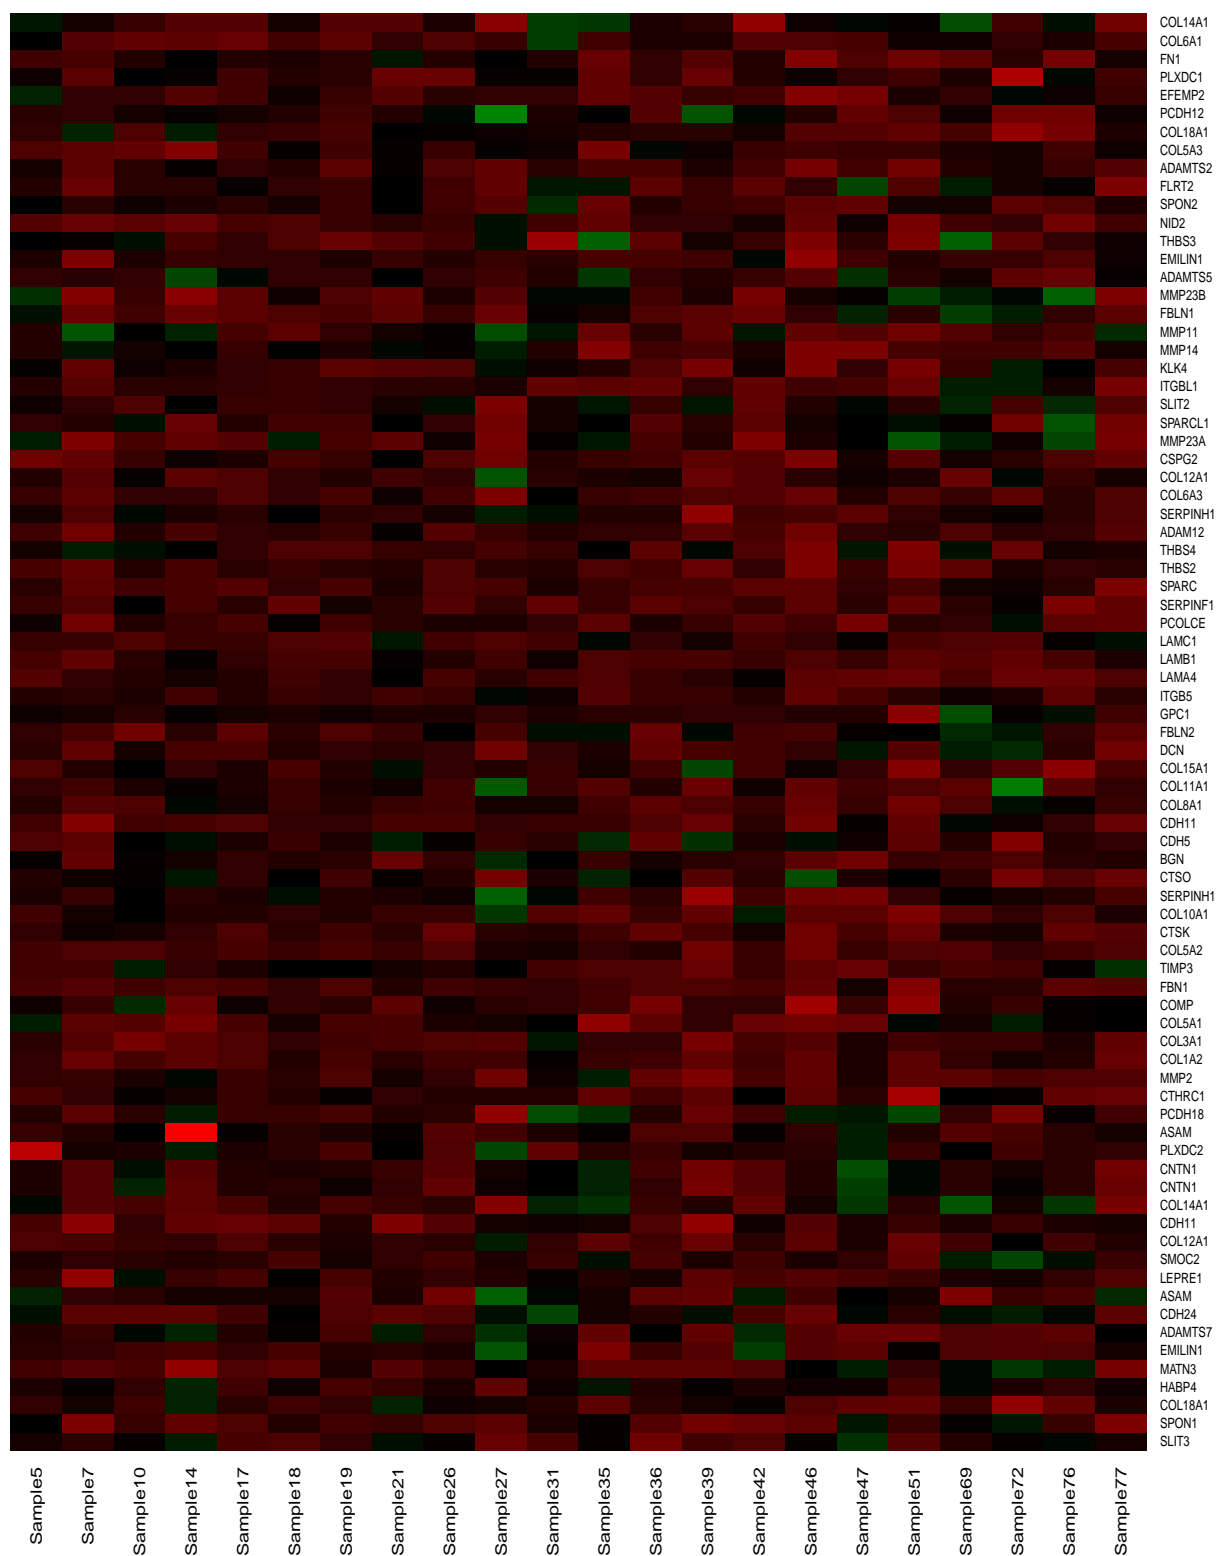

Figure 1: Heatmap of the LAS bicluster



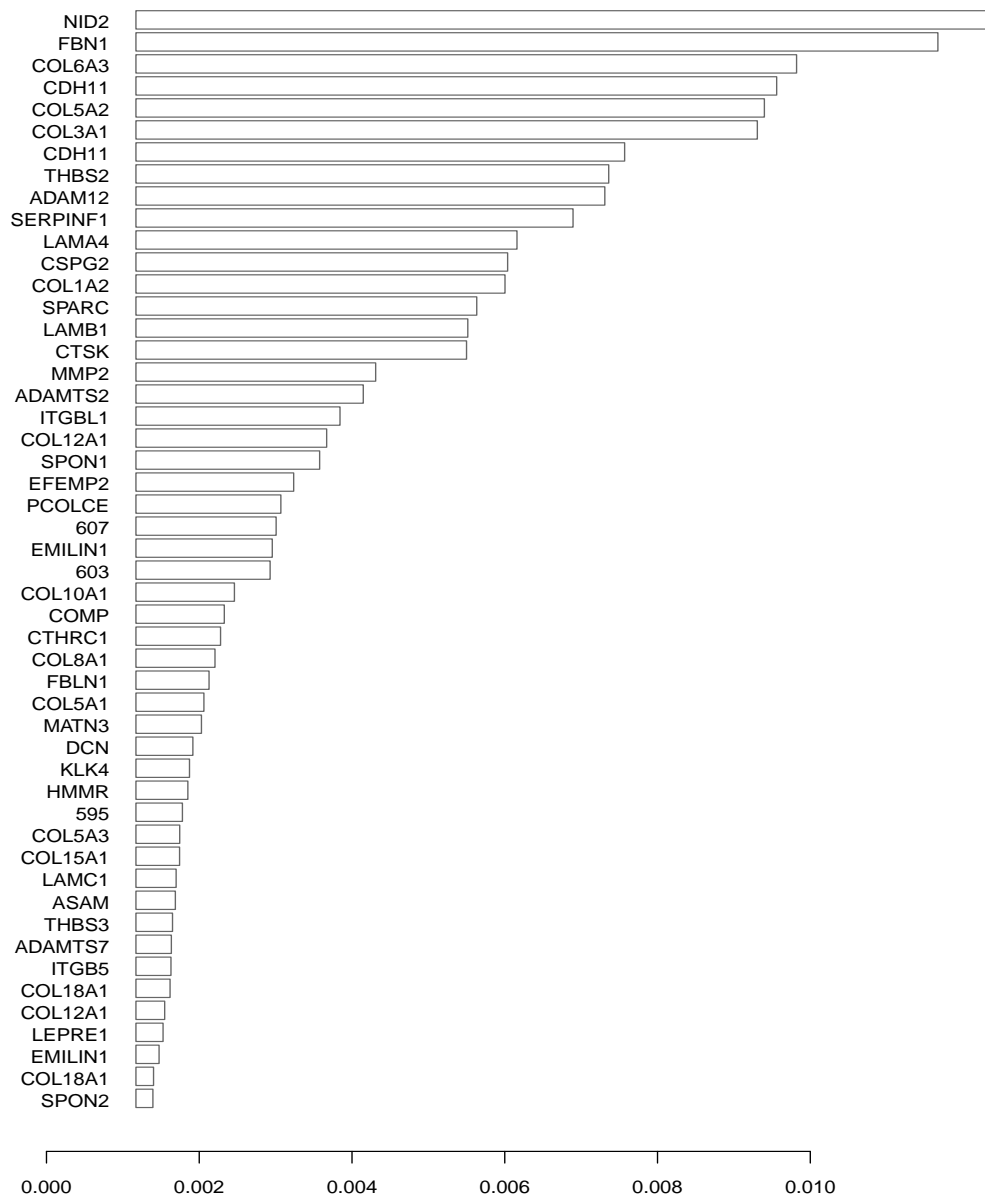

Figure 2: Most informative genes for the LAS bicluster

Number of informative genes of the LAS bicluster that also belong to the ECM3 consensus list: 28 of 34 (82%)

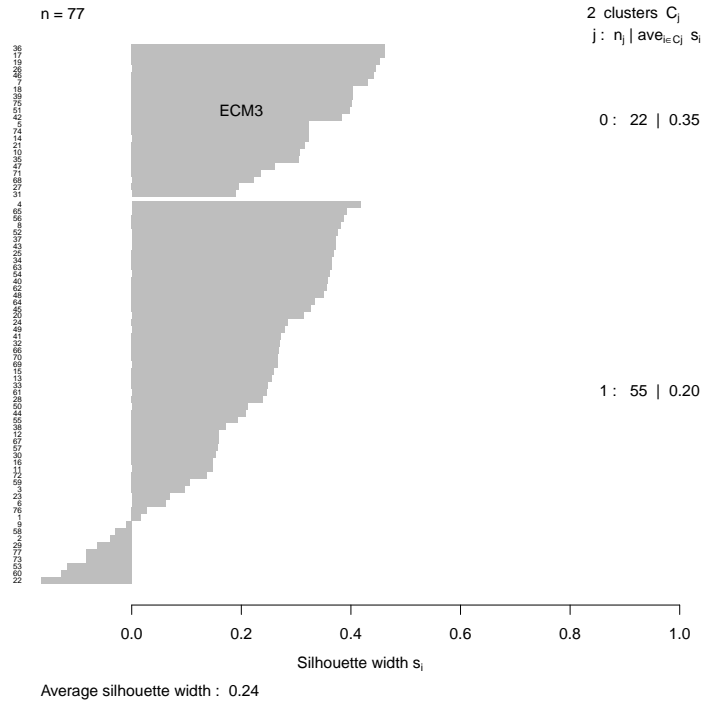

Figure 3: Silhouette plot for the LAS bicluster

| Connectivity | Dunn Index |
|--------------|------------|
| 15.99        | 0.32       |

Table 1: Connectivity validation measure and Dunn Index of LAS partitioning

## 2.2 IRCC-KM bicluster

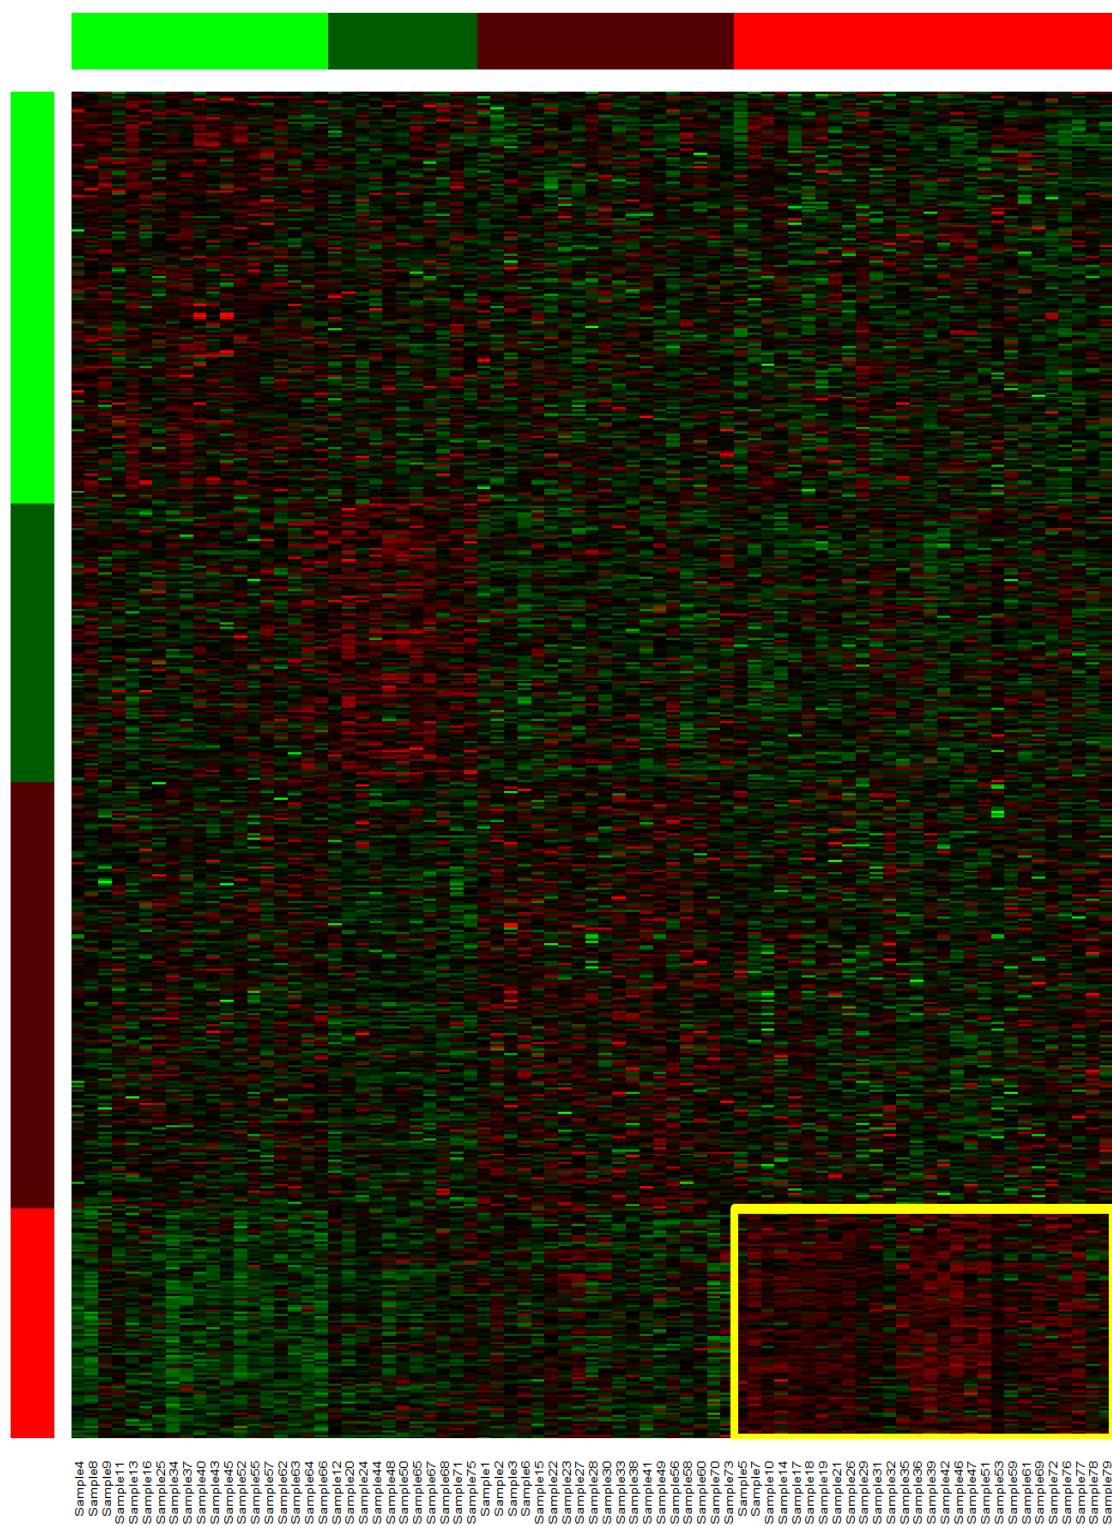

Figure 4: Heatmap of the IRCC-KM bicluster

*IRCC-KM genes*

ADAM12 ADAMTS10 ADAMTS2 ADAMTS5 ADAMTS7 APP ASAM ASAM  
 BGN CDH11 CDH11 CDH13 CDH24 CDH5 CEECAM1 CHPF  
 CNTN1 CNTN1 COL10A1 COL11A1 COL12A1 COL12A1 COL14A1 COL14A1  
 COL15A1 COL18A1 COL18A1 COL1A2 COL3A1 COL5A1 COL5A2 COL5A3  
 COL6A1 COL6A3 COL8A1 COMP CSG1cA\_T CSPG2 CTHRC1 CTSK  
 DCN EFEMP2 EMILIN1 EMILIN1 ESAM FBLN1 FBLN1 FBLN2  
 FBLN5 FBN1 FLRT2 FN1 GPC1 GPC6 HABP4 ITGA11  
 ITGA5 ITGB1 ITGB1 ITGB5 ITGBL1 KLK4 LAMA4 LAMB1  
 LAMB2 LAMC1 LEPRE1 MATN3 MMP11 MMP13 MMP14 MMP2  
 MMP23A MMP23B NID2 NRP2 NTN4 PCDH12 PCDH18 PCDH18  
 PCDH7 PCOLCE PGCP PLXDC1 PLXDC2 PLXND1 SDC2 SEMA5A  
 SERPINF1 SERPINH1 SERPINH1 SLIT2 SLIT3 SMOC2 SPARC SPARCL1  
 SPG20 SPG3A SPON1 SPON2 THBS1 THBS2 THBS3 THBS4  
 TIMP3

*IRCC-KM samples*

Sample5 Sample7 Sample10 Sample14 Sample17 Sample18 Sample19 Sample21  
 Sample26 Sample29 Sample31 Sample32 Sample35 Sample36 Sample39 Sample42  
 Sample46 Sample47 Sample51 Sample53 Sample59 Sample61 Sample69 Sample72  
 Sample76 Sample77 Sample78 Sample79

**2.2.1 Comparing LAS and IRCC-KM biclusters**

|                    | No ECM | ECM3 |
|--------------------|--------|------|
| No ECM3            | 508    | 1    |
| ECM3               | 27     | 78   |
| Jaccard similarity | 0.74   |      |

Table 2: Comparing gene lists: LAS (column) vs. IRCC-KM bicluster (row)

|                    | No ECM | ECM3 |
|--------------------|--------|------|
| No ECM3            | 48     | 1    |
| ECM3               | 7      | 21   |
| Jaccard similarity | 0.72   |      |

Table 3: Comparing sample lists: LAS (column) vs. IRCC-KM bicluster (row)

## 2.3 IRCC-HC bicluster

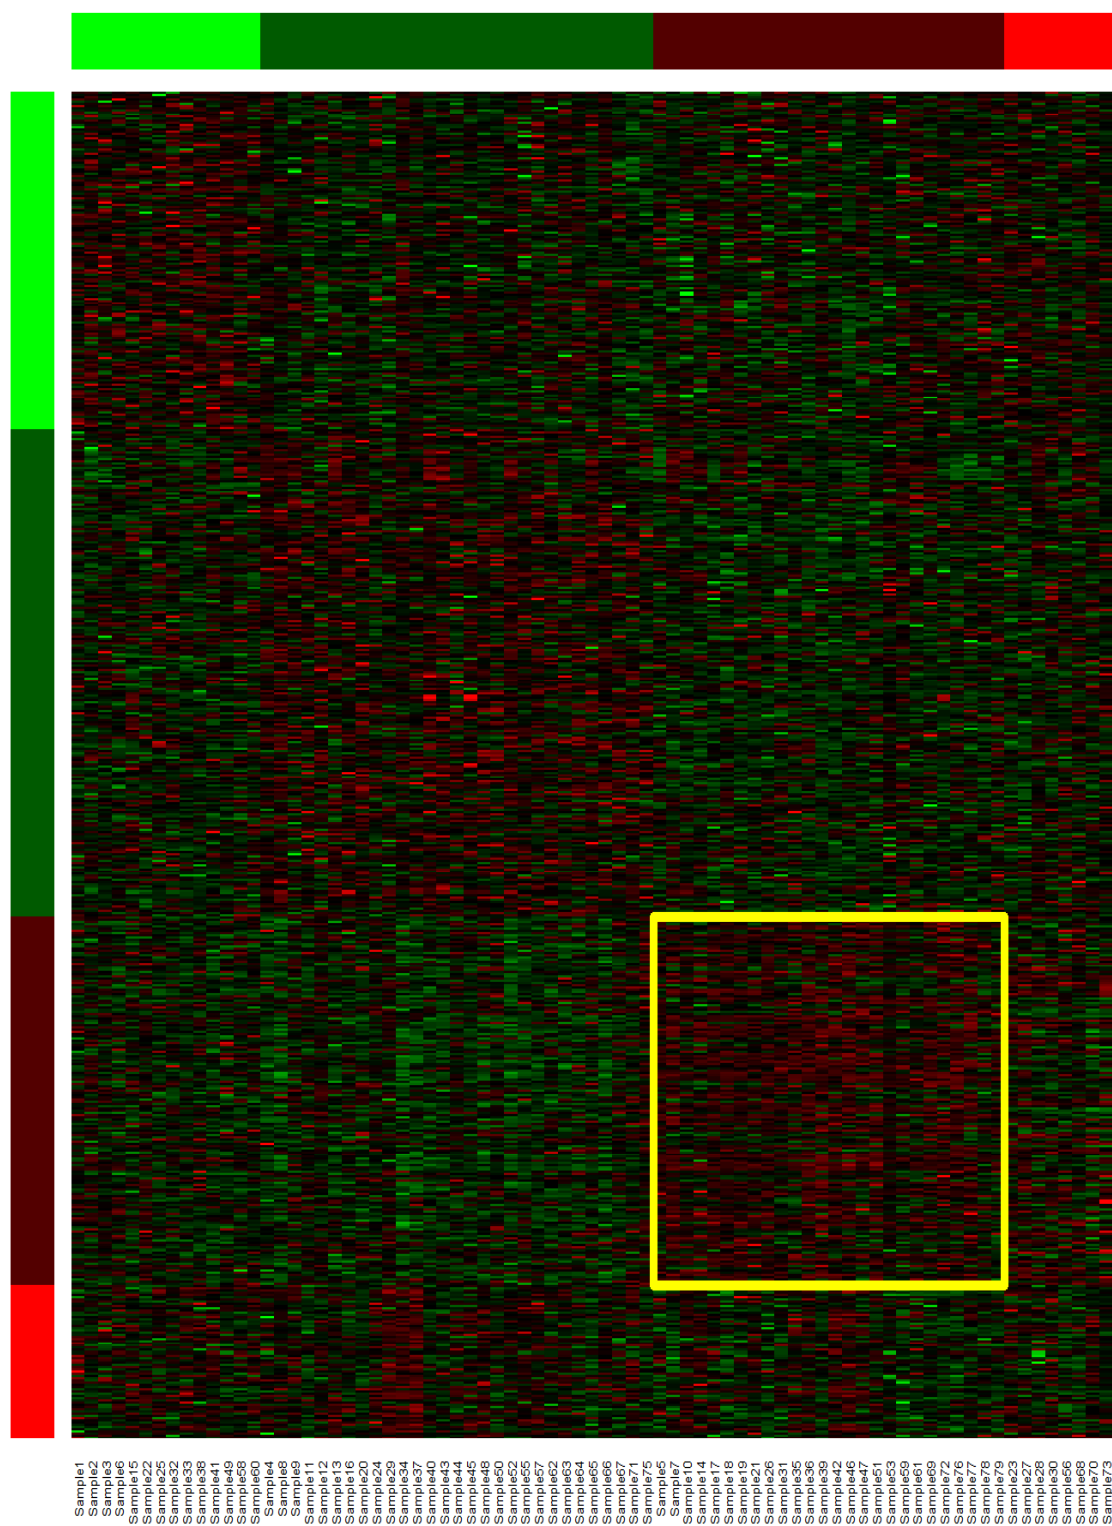

Figure 5: Heatmap of the IRCC-HC bicluster

*IRCC-HC genes*

|          |          |          |           |              |          |
|----------|----------|----------|-----------|--------------|----------|
| ADAM10   | ADAM12   | ADAM19   | ADAM22    | ADAM9        | ADAMTS1  |
| ADAMTS10 | ADAMTS2  | ADAMTS5  | ADAMTS7   | APP          | ASAM     |
| ASAM     | BGN      | BST1     | CD36      | CD47         | CDH11    |
| CDH11    | CDH13    | CDH15    | CDH23     | CDH24        | CDH5     |
| CHL1     | CHPF     | CHSY1    | CNTN1     | CNTN1        | CNTN1    |
| CNTN3    | COL10A1  | COL11A1  | COL12A1   | COL12A1      | COL14A1  |
| COL14A1  | COL15A1  | COL17A1  | COL18A1   | COL18A1      | COL1A2   |
| COL3A1   | COL4A1   | COL4A2   | COL5A2    | COL5A3       | COL6A1   |
| COL6A3   | COL8A1   | COMP     | CSG1cA_T  | CSPG2        | CSPG6    |
| CTHRC1   | CTSK     | CTSO     | DCN       | DKFZP586H212 | DPP4     |
| EFEMP2   | EMILIN1  | EMILIN1  | ENPEP     | ESAM         | FBLN1    |
| FBLN1    | FBLN1    | FBLN2    | FBLN5     | FBN1         | FBN2     |
| FLJ25084 | FLRT2    | FN1      | GALNACT-2 | GPC1         | GPC6     |
| HABP4    | HAS1     | HAS2     | IBSP      | ITGA5        | ITGA8    |
| ITGAV    | ITGB1    | ITGB1    | ITGB1BP1  | ITGB5        | ITGBL1   |
| KLK11    | KLK12    | KLK4     | LAMA4     | LAMB1        | LAMC1    |
| LEPRE1   | MASP1    | MATN2    | MATN3     | MCAM         | MGP      |
| MME      | MME      | MME      | MMP11     | MMP13        | MMP14    |
| MMP2     | MMP23A   | MMP23B   | MMP3      | NID2         | NTN4     |
| NTN4     | PAPLN    | PCDH12   | PCDH17    | PCDH18       | PCDH18   |
| PCDH21   | PCDH7    | PCDHB6   | PCOLCE    | PECAM1       | PGCP     |
| PGCP     | PLXDC1   | PLXDC2   | PLXNA2    | PLXNC1       | PRG1     |
| SDC2     | SELE     | SEMA3E   | SEMA5A    | SEMA6D       | SERPINE1 |
| SERPINE1 | SERPINF1 | SERPINF2 | SERPING1  | SERPINH1     | SERPINH1 |
| SGCA     | SGCB     | SGCE     | SLIT2     | SLIT3        | SLIT3    |
| SLITRK3  | SMOC2    | SPARC    | SPARCL1   | SPG20        | SPG3A    |
| SPON1    | SPON2    | STIM2    | THBS1     | THBS2        | THBS3    |
| THBS4    | TIMP1    | TIMP3    | TIMP4     | TNC          | VWF      |

*IRCC-HC samples*

Sample5 Sample7 Sample10 Sample14 Sample17 Sample18 Sample19 Sample21  
Sample26 Sample31 Sample35 Sample36 Sample39 Sample42 Sample46 Sample47  
Sample51 Sample53 Sample59 Sample61 Sample69 Sample72 Sample76 Sample77  
Sample78 Sample79

### 2.3.1 Comparing LAS and IRCC-HC biclusters

|                    | No ECM | ECM3 |
|--------------------|--------|------|
| No ECM3            | 445    | 1    |
| ECM3               | 90     | 78   |
| Jaccard similarity | 0.46   |      |

Table 4: Comparing gene lists: LAS (column) vs. IRCC-HC bicluster (row)

|                    | No ECM | ECM3 |
|--------------------|--------|------|
| No ECM3            | 50     | 1    |
| ECM3               | 5      | 21   |
| Jaccard similarity | 0.78   |      |

Table 5: Comparing sample lists: LAS (column) vs. IRCC-HC bicluster (row)

## 2.4 CCSS bicluster

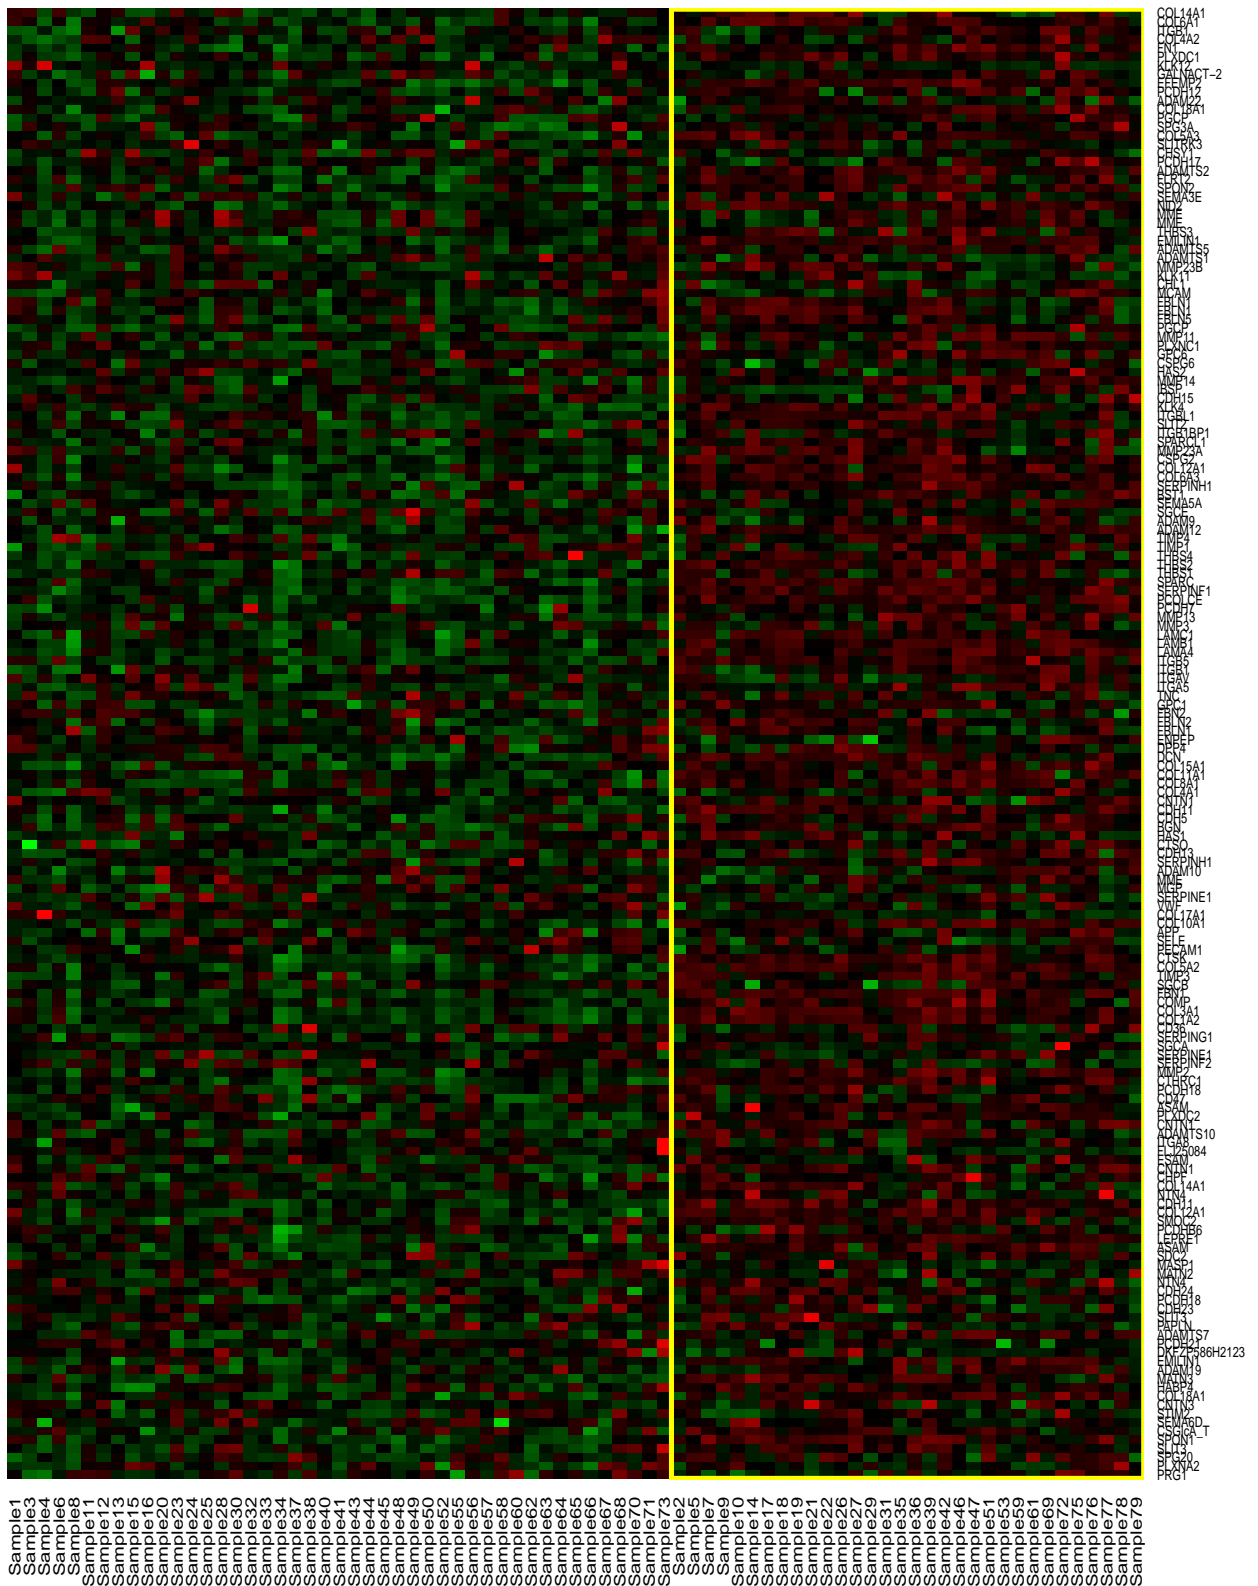

Figure 6: Heatmap of the CCSS bicluster



### 2.4.1 Comparing LAS and CCSS biclusters

|                    | No ECM | ECM3 |
|--------------------|--------|------|
| No ECM3            | 45     | 0    |
| ECM3               | 10     | 22   |
| Jaccard similarity | 0.69   |      |

Table 6: Comparing sample lists: LAS (column) vs. CCSS (row) biclusters

### 2.4.2 Prediction strength for CCSS

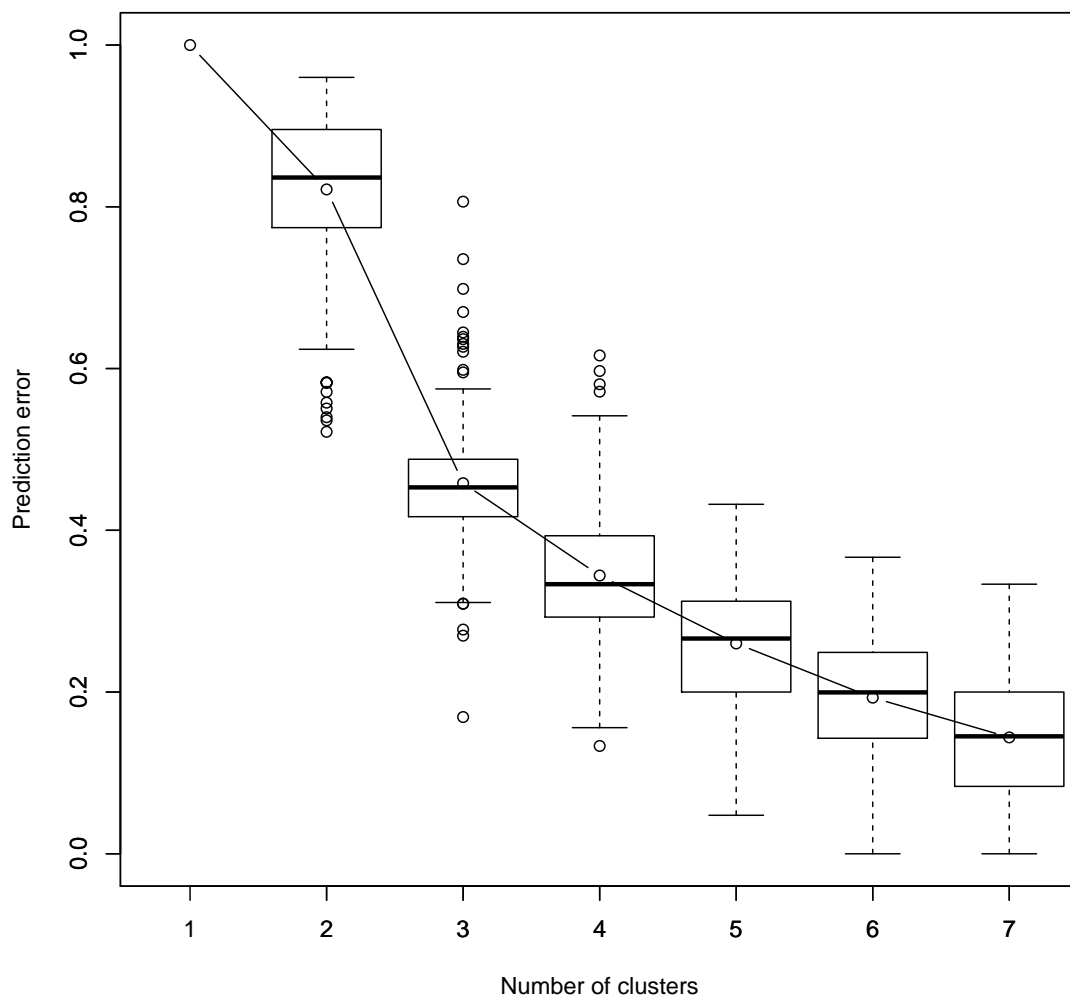

### 2.4.3 Consensus clustering

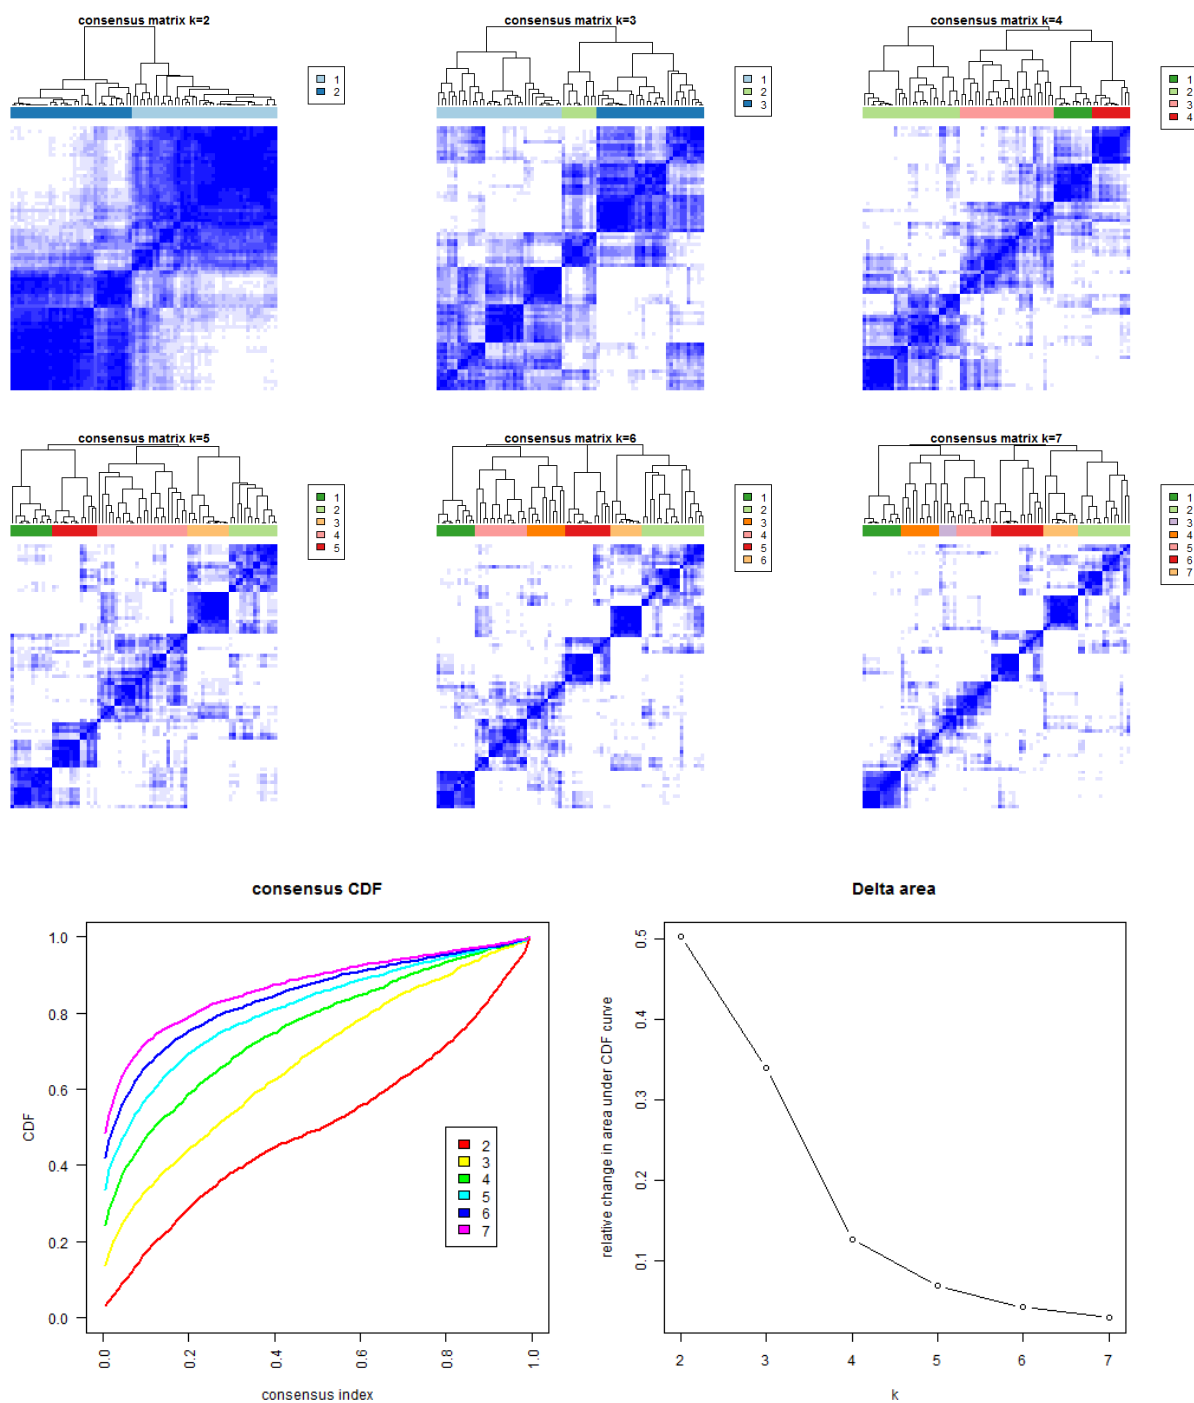

Figure 7: Statistical significance of CCSS clustering (Consensus clustering )

## 2.4.4 Statistical significance

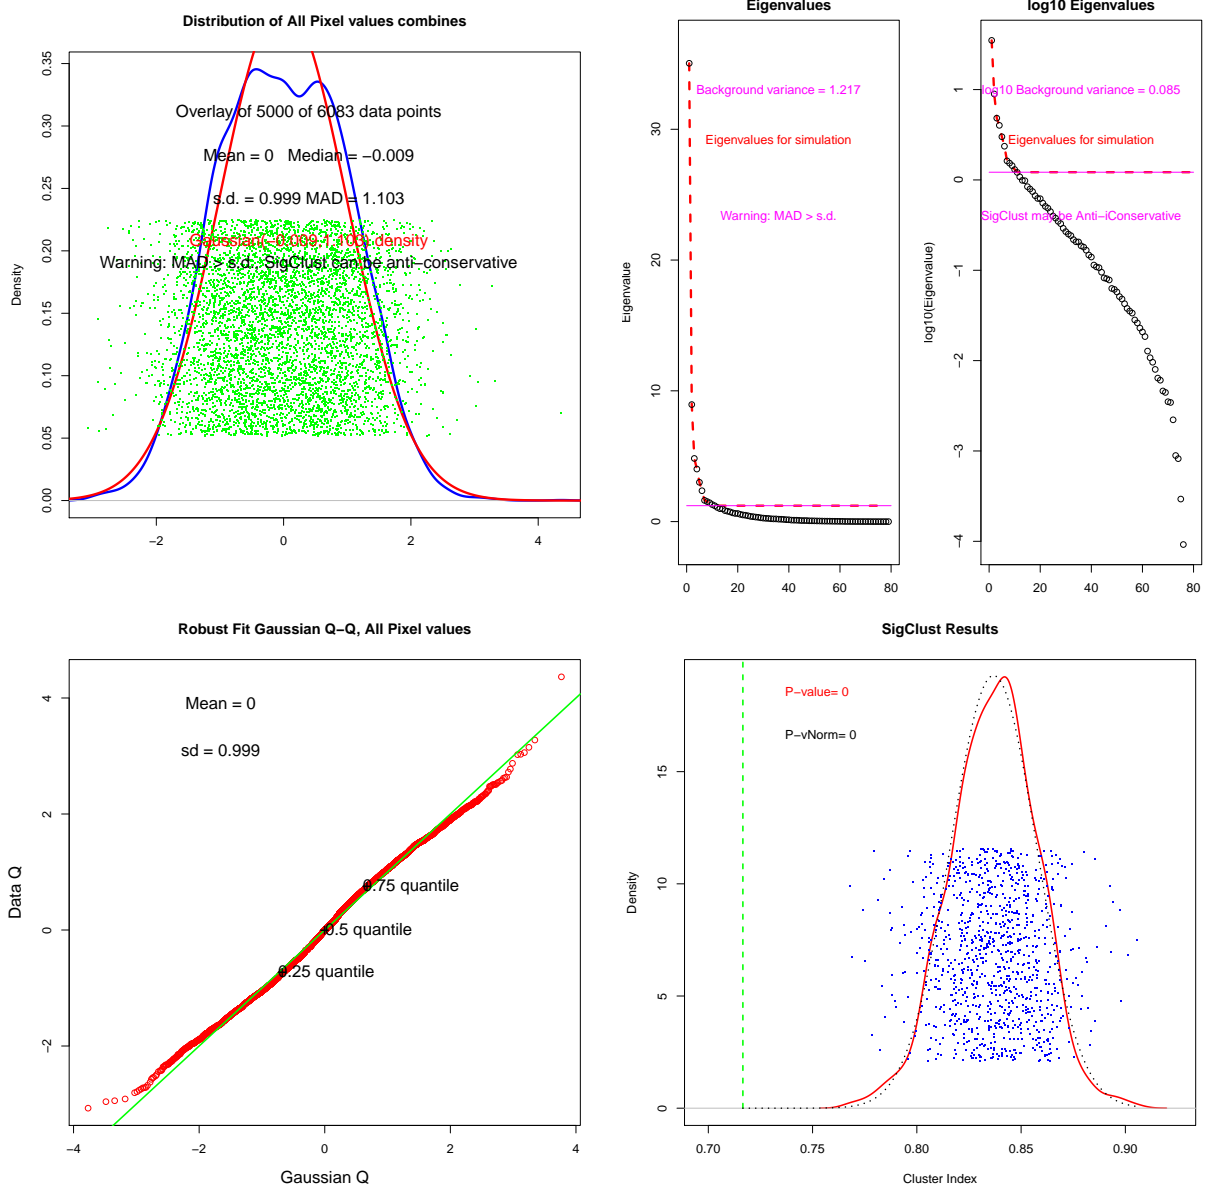

| P-value | P-vNorm |
|---------|---------|
| 0.0E+00 | 3.1E-09 |

Table 7: SigClust p-values

## 2.4.5 Cluster-wise assessment of cluster stability

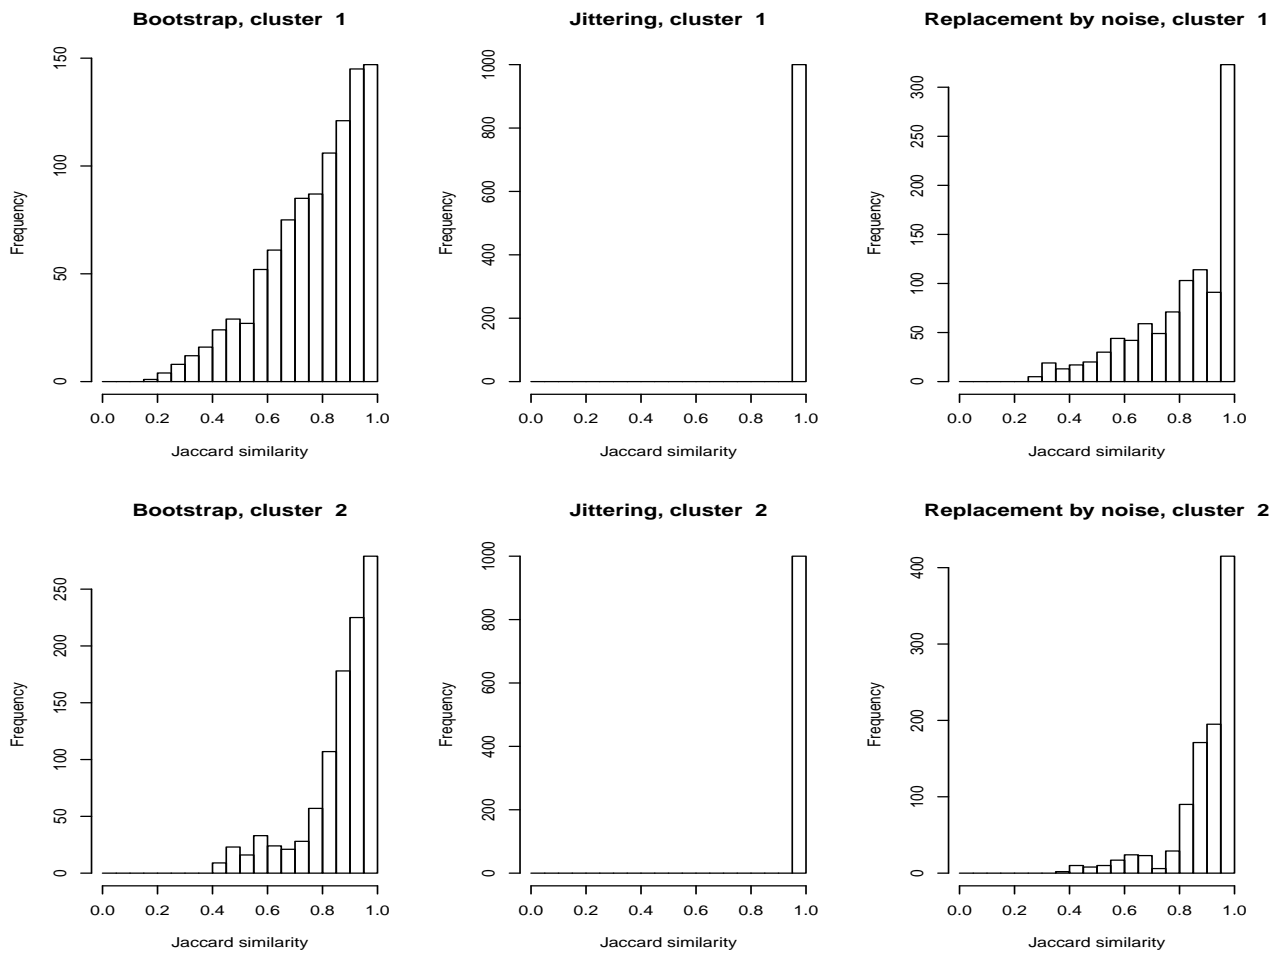

\* Cluster stability assessment \*

Cluster method: kmeans

Full clustering results are given as parameter result of the clusterboot object, which also provides further statistics of the resampling results.

Number of resampling runs: 1000

Number of clusters found in data: 2

Clusterwise Jaccard bootstrap mean:

[1] 0.7787438 0.8649353

dissolved:

[1] 94 32

recovered:

[1] 606 846

Clusterwise Jaccard jittering mean:

[1] 1 1

dissolved:

[1] 0 0

recovered:

```

[1] 1000 1000
Clusterwise Jaccard replacement by noise mean:
[1] 0.8150483 0.8962224
dissolved:
[1] 74 20
recovered:
[1] 702 900

```

*Removing one sample*

| Min.   | 1st Qu. | Median | Mean   | 3rd Qu. | Max.   |
|--------|---------|--------|--------|---------|--------|
| 0.9697 | 1.0000  | 1.0000 | 0.9953 | 1.0000  | 1.0000 |

*Removing one gene*

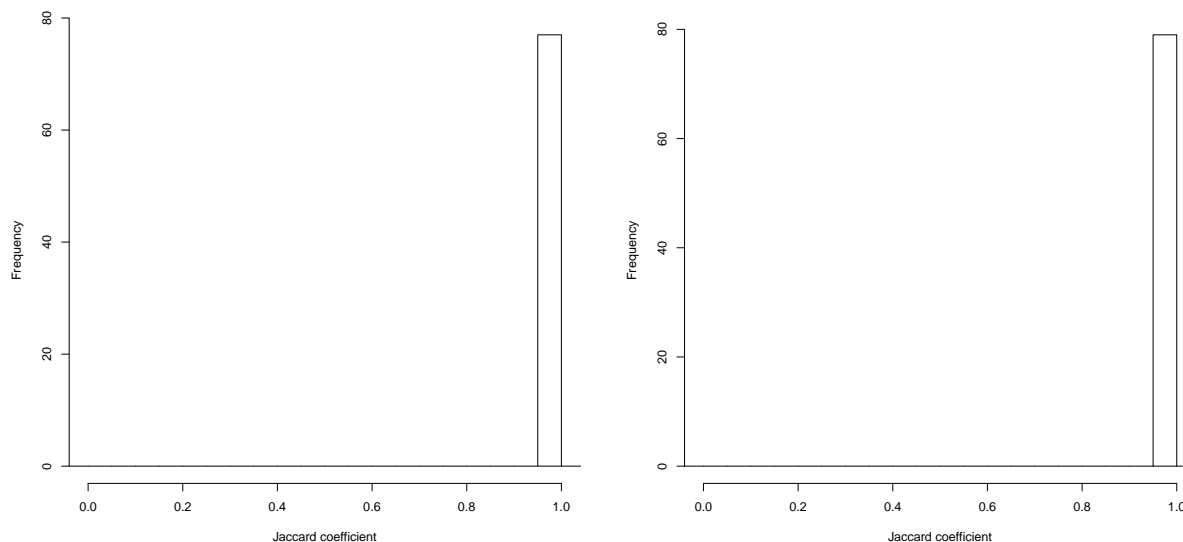

Figure 8: Removing one sample (left) and one gene (right) at a time: distributions of Jaccard coefficients

| Min.   | 1st Qu. | Median | Mean   | 3rd Qu. | Max.   |
|--------|---------|--------|--------|---------|--------|
| 0.9697 | 0.9706  | 1.0000 | 0.9907 | 1.0000  | 1.0000 |

| APN     |         | AD      |        | ADM     |        | FOM     |         |
|---------|---------|---------|--------|---------|--------|---------|---------|
| Min.    | :0.2125 | Min.    | :10.68 | Min.    | :2.375 | Min.    | :0.6294 |
| 1st Qu. | :0.2286 | 1st Qu. | :10.72 | 1st Qu. | :2.556 | 1st Qu. | :0.7733 |
| Median  | :0.2286 | Median  | :10.72 | Median  | :2.556 | Median  | :0.8604 |
| Mean    | :0.2330 | Mean    | :10.73 | Mean    | :2.611 | Mean    | :0.8427 |
| 3rd Qu. | :0.2437 | 3rd Qu. | :10.76 | 3rd Qu. | :2.742 | 3rd Qu. | :0.9247 |
| Max.    | :0.2437 | Max.    | :10.76 | Max.    | :2.742 | Max.    | :0.9812 |

*Removing sets of k genes*

| Min.   | 1st Qu. | Median | Mean   | 3rd Qu. | Max.   |
|--------|---------|--------|--------|---------|--------|
| 0.7045 | 0.8611  | 0.8889 | 0.8889 | 0.9167  | 1.0000 |

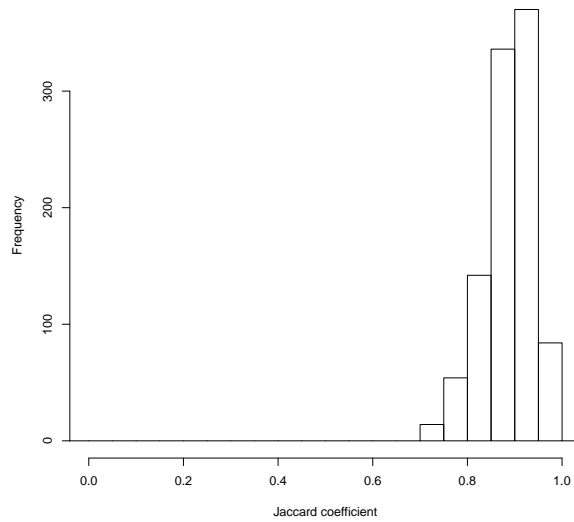

Figure 9: Removing two thirds of the genes: distribution of Jaccard coefficients

## 2.4.6 Validation measures

Clustering Methods:

kmeans

Cluster sizes:

2 3 4 5 6

Validation Measures:

|        |              | 2       | 3       | 4       | 5       | 6       |
|--------|--------------|---------|---------|---------|---------|---------|
| kmeans | APN          | 0.0080  | 0.1198  | 0.0320  | 0.1266  | 0.1599  |
|        | AD           | 10.1230 | 9.7911  | 9.1010  | 8.9703  | 8.6735  |
|        | ADM          | 0.1152  | 1.3278  | 0.3305  | 1.1478  | 1.3488  |
|        | FOM          | 0.8427  | 0.8114  | 0.7739  | 0.7688  | 0.7420  |
|        | Connectivity | 23.9448 | 41.5837 | 44.7028 | 66.4540 | 70.1206 |
|        | Dunn         | 0.3521  | 0.3714  | 0.4027  | 0.4198  | 0.4184  |
|        | Silhouette   | 0.2444  | 0.1501  | 0.1594  | 0.1158  | 0.1209  |

Optimal Scores:

|              | Score   | Method | Clusters |
|--------------|---------|--------|----------|
| APN          | 0.0080  | kmeans | 2        |
| AD           | 8.6735  | kmeans | 6        |
| ADM          | 0.1152  | kmeans | 2        |
| FOM          | 0.7420  | kmeans | 6        |
| Connectivity | 23.9448 | kmeans | 2        |
| Dunn         | 0.4198  | kmeans | 5        |
| Silhouette   | 0.2444  | kmeans | 2        |



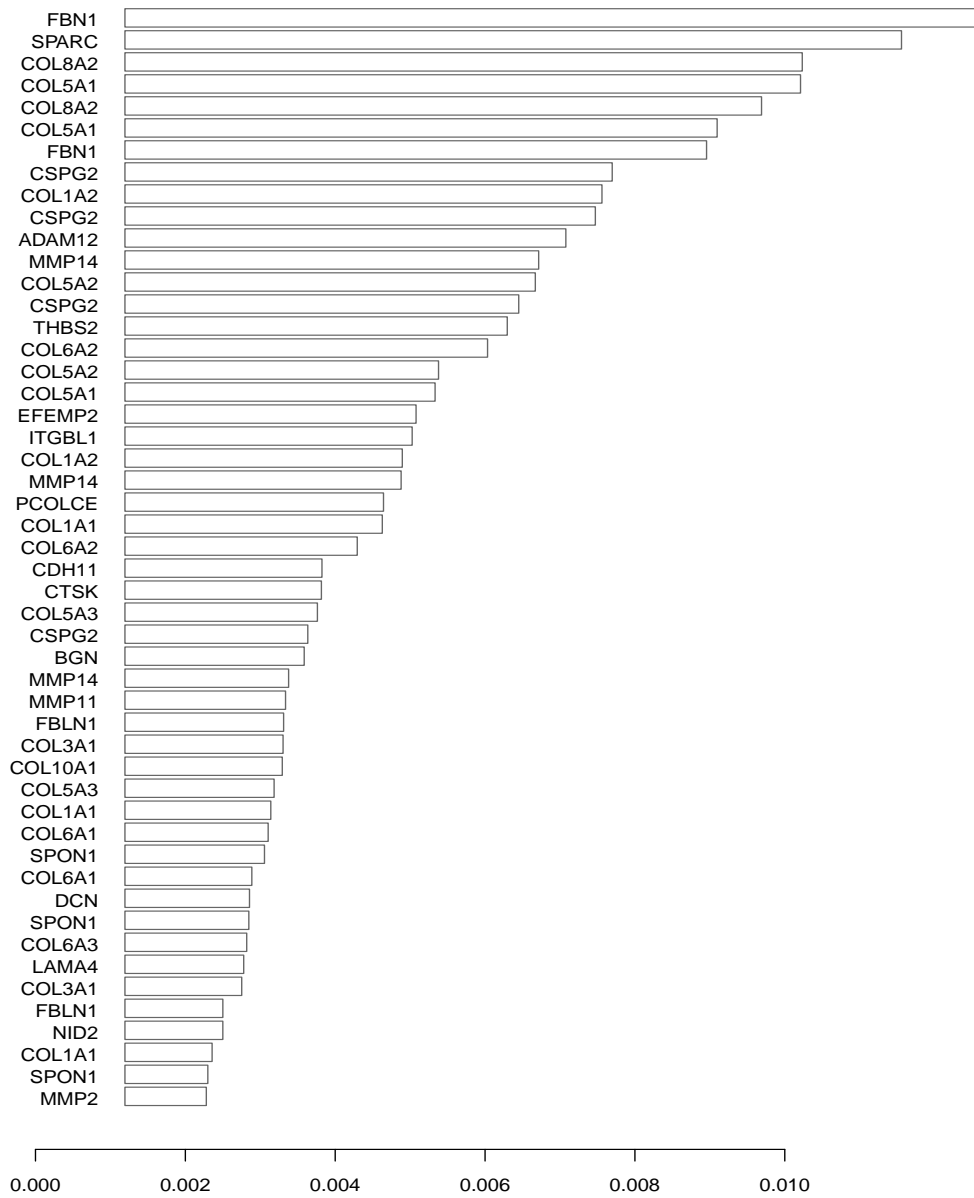

Figure 11: Most informative genes for the LAS bicluster

Number of informative genes of the LAS bicluster that also belong to the ECM3 consensus list: 32 of 34 (94%)



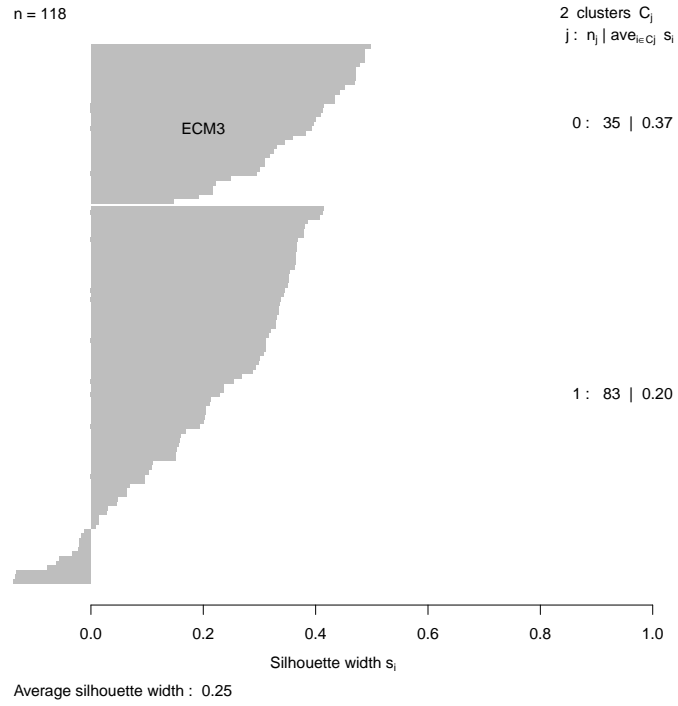

Figure 12: Silhouette plot for the LAS bicluster

| Connectivity | Dunn Index |
|--------------|------------|
| 17.90        | 0.38       |

Table 8: Connectivity validation measure and Dunn Index of LAS partitioning

### 3.2 IRCC-KM bicluster

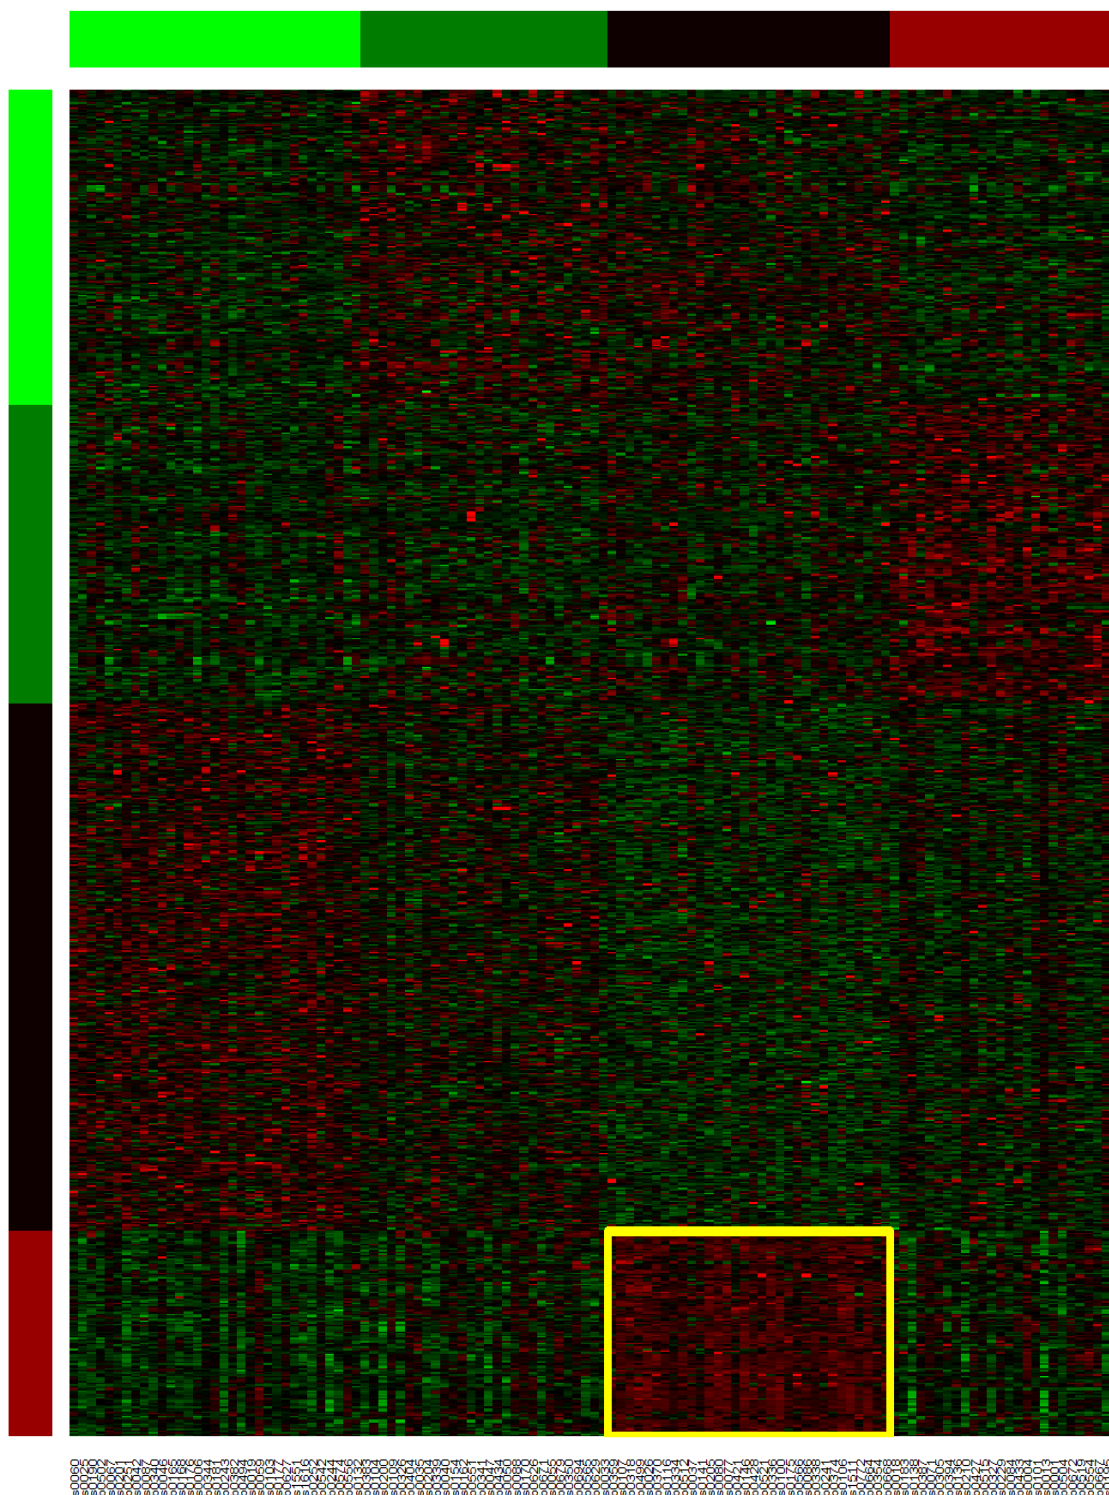

Figure 13: Heatmap of the IRCC-KM bicluster

*IRCC-KM genes*

|           |         |         |         |          |          |          |          |
|-----------|---------|---------|---------|----------|----------|----------|----------|
| ADAM12    | ADAMTS2 | ADAMTS5 | BGN     | BGN      | BGN      | CDH11    | CDH11    |
| COL10A1   | COL11A1 | COL11A1 | COL14A1 | COL15A1  | COL16A1  | COL18A1  | COL18A1  |
| COL1A1    | COL1A1  | COL1A1  | COL1A2  | COL1A2   | COL3A1   | COL3A1   | COL3A1   |
| COL5A1    | COL5A1  | COL5A1  | COL5A2  | COL5A2   | COL5A3   | COL5A3   | COL6A1   |
| COL6A1    | COL6A1  | COL6A1  | COL6A2  | COL6A2   | COL6A3   | COL8A1   | COL8A2   |
| COL8A2    | COMP    | CPA3    | CSPG2   | CSPG2    | CSPG2    | CSPG2    | CTSK     |
| DCN       | DCN     | DCN     | DCN     | DPP4     | DSPG3    | EFEMP1   | EFEMP2   |
| EFEMP2    | ELN     | EMILIN1 | FBLN1   | FBLN1    | FBLN1    | FBLN2    | FBN1     |
| FBN1      | FLRT2   | FN1     | FN1     | FN1      | FN1      | FN1      | FN1      |
| GALNACT_2 | HSPG2   | ITGA5   | ITGAV   | ITGB1    | ITGB5    | ITGB5    | ITGB5    |
| ITGB5     | ITGBL1  | LAMA4   | LAMA4   | LAMB1    | LAMC1    | LEPRE1   | MATN3    |
| MMP11     | MMP11   | MMP13   | MMP14   | MMP14    | MMP14    | MMP14    | MMP19    |
| MMP2      | NID2    | NRP1    | NRP1    | PCDH7    | PCDH7    | PCDH7    | PCOLCE   |
| PLXDC1    | SDC2    | SDC2    | SDC2    | SERPINE1 | SERPINE1 | SERPINF1 | SERPINH1 |
| SGCD      | SLIT3   | SPARC   | SPARCL1 | SPON1    | SPON1    | SPON1    | SPON1    |
| SPON2     | THBS1   | THBS1   | THBS1   | THBS2    | TIMP3    | TIMP3    | TIMP3    |
| TIMP3     |         |         |         |          |          |          |          |

*IRCC-KM samples*

b0359 s0107 b0318 b0499 s0026 b0370 s0116 b0334  
b0512 s0037 s0141 s0205 s0080 s0077 b0421 s0146  
b0428 b0521 b0336 s0100 s0175 b0566 s0086 b0338  
b0241 b0374 s0106 s1511 b0772 b0664 b0354 b0668

**3.2.1 Comparing LAS and IRCC-KM biclusters**

|                    | No ECM | ECM3 |
|--------------------|--------|------|
| No ECM3            | 702    | 14   |
| ECM3               | 9      | 120  |
| Jaccard similarity | 0.84   |      |

Table 9: Comparing gene lists: LAS (column) vs. IRCC-KM bicluster (row)

|                    | No ECM | ECM3 |
|--------------------|--------|------|
| No ECM3            | 83     | 3    |
| ECM3               | 0      | 32   |
| Jaccard similarity | 0.91   |      |

Table 10: Comparing sample lists: LAS (column) vs. IRCC-KM bicluster (row)

### 3.3 IRCC-HC bicluster

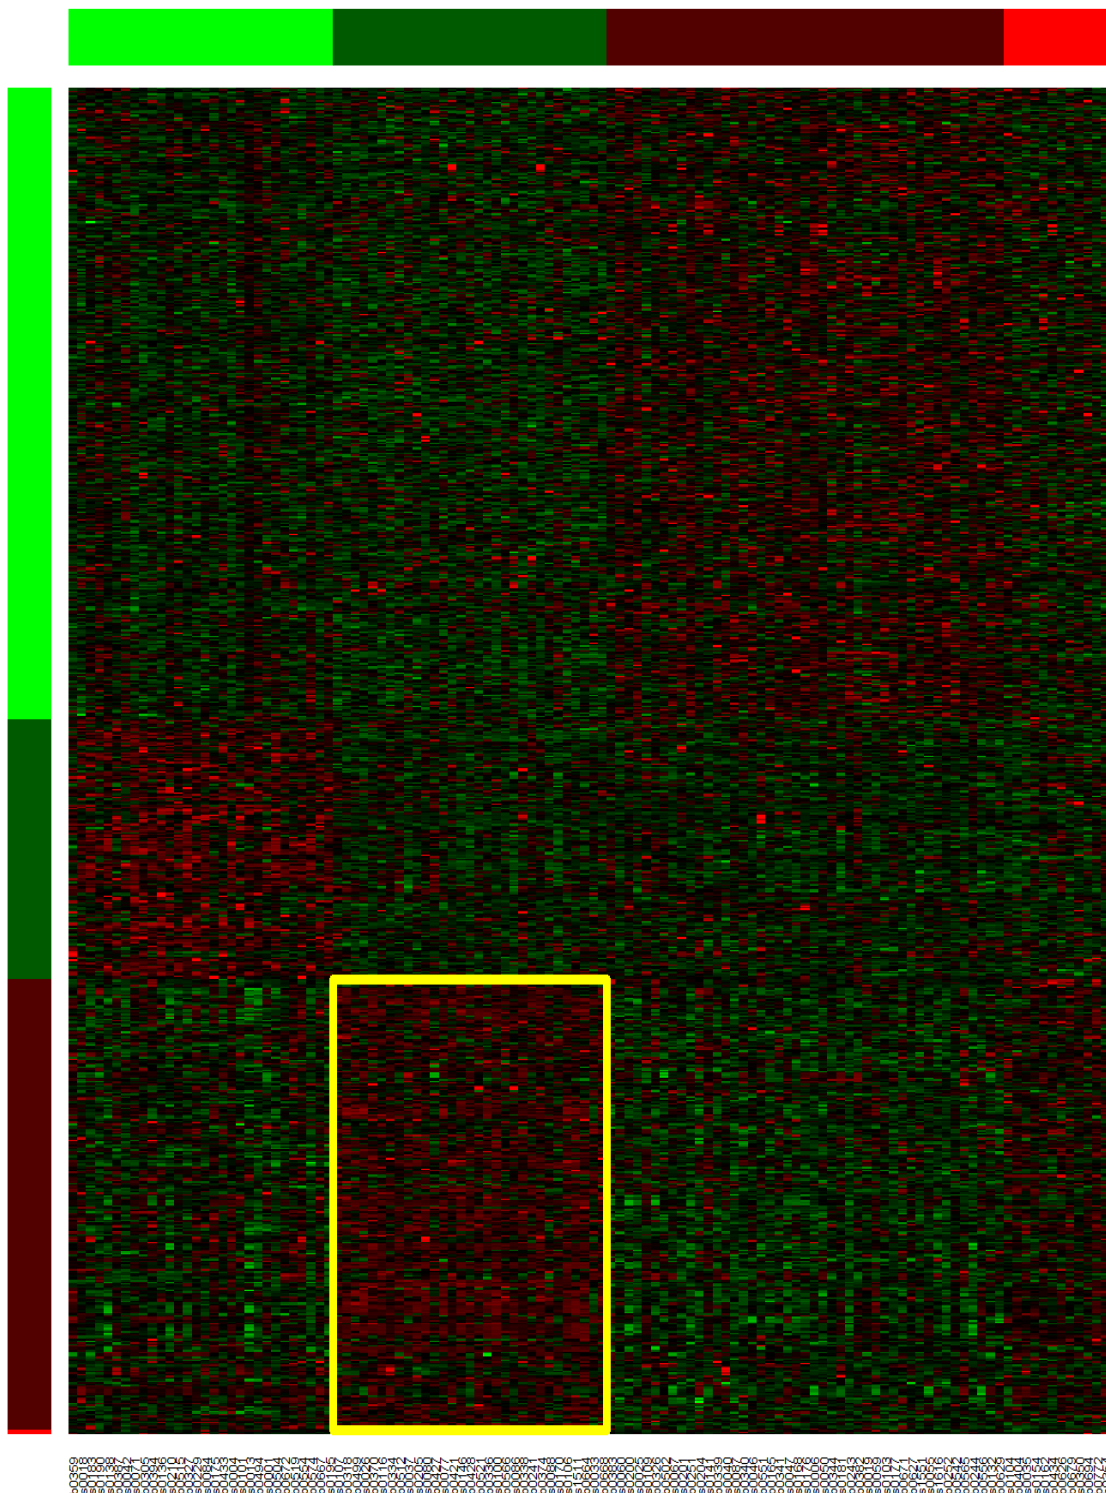

Figure 14: Heatmap of the IRCC-HC bicluster

*IRCC-HC genes*

|          |          |          |              |          |          |
|----------|----------|----------|--------------|----------|----------|
| ADAM10   | ADAM10   | ADAM10   | ADAM12       | ADAM15   | ADAM2    |
| ADAM9    | ADAMTS2  | ADAMTS5  | AGT          | ALCAM    | ALCAM    |
| BGN      | BGN      | BGN      | BST1         | BST2     | CD164    |
| CD164    | CD164    | CD36     | CD36         | CD44     | CD44     |
| CD44     | CD44     | CD44     | CD9          | CDH1     | CDH1     |
| CDH11    | CDH11    | CDH13    | CDH2         | CEACAM1  | CEACAM1  |
| CEACAM1  | CEACAM1  | CEACAM1  | CEACAM5      | CEACAM6  | CEACAM7  |
| CHL1     | CHPF     | CHSY1    | CIB1         | CLU      | CLU      |
| CLU      | COL10A1  | COL11A1  | COL11A1      | COL13A1  | COL14A1  |
| COL15A1  | COL16A1  | COL17A1  | COL18A1      | COL18A1  | COL1A1   |
| COL1A1   | COL1A1   | COL1A2   | COL1A2       | COL3A1   | COL3A1   |
| COL3A1   | COL4A1   | COL4A1   | COL4A2       | COL4A2   | COL4A3BP |
| COL4A5   | COL5A1   | COL5A1   | COL5A1       | COL5A2   | COL5A2   |
| COL5A3   | COL5A3   | COL6A1   | COL6A1       | COL6A1   | COL6A1   |
| COL6A1   | COL6A2   | COL6A2   | COL6A3       | COL7A1   | COL8A1   |
| COL8A2   | COL8A2   | COMP     | CPA3         | CPD      | CPD      |
| CPD      | CPD      | CPE      | CPE          | CPM      | CSPG2    |
| CSPG2    | CSPG2    | CSPG2    | CSPG6        | CSPG6    | CSPG6    |
| CTSK     | CTSO     | DAG1     | DAG1         | DCN      | DCN      |
| DCN      | DCN      | DCN      | DKFZP586H212 | DPP4     | DPP4     |
| DPP4     | DSPG3    | ECM1     | EFEMP1       | EFEMP1   | EFEMP2   |
| EFEMP2   | ELN      | ELN      | EMILIN1      | ENPEP    | ENPEP    |
| FBLN1    | FBLN1    | FBLN1    | FBLN2        | FBLN5    | FBN1     |
| FBN1     | FBN2     | FLRT2    | FN1          | FN1      | FN1      |
| FN1      | FN1      | FN1      | GALNACT_2    | GPC3     | GPC4     |
| GPC4     | HSPG2    | HSPG2    | IBSP         | ITGA2    | ITGA5    |
| ITGA6    | ITGA6    | ITGA7    | ITGA7        | ITGAV    | ITGB1    |
| ITGB1    | ITGB3    | ITGB3BP  | ITGB5        | ITGB5    | ITGB5    |
| ITGB5    | ITGB6    | ITGB6    | ITGBL1       | LAMA2    | LAMA4    |
| LAMA4    | LAMA4    | LAMA4    | LAMB1        | LAMB2    | LAMC1    |
| LAMC1    | LAMC3    | LEPRE1   | MATN2        | MATN3    | MCAM     |
| MCAM     | MCAM     | MCAM     | MGEA5        | MGEA5    | MGP      |
| MME      | MME      | MMP10    | MMP11        | MMP11    | MMP13    |
| MMP14    | MMP14    | MMP14    | MMP14        | MMP19    | MMP2     |
| MMP23B   | MMP28    | NID2     | NRP1         | NRP1     | NRXN2    |
| OSGEPL1  | PCDH12   | PCDH17   | PCDH7        | PCDH7    | PCDH7    |
| PCDH9    | PCDHA12  | PCDHGA1  | PCDHGA11     | PCDHGA3  | PCDHGB7  |
| PCDHGC3  | PCDHGC3  | PCOLCE   | PGCP         | PGCP     | PLXDC1   |
| PLXDC1   | PLXNC1   | PLXND1   | PLXND1       | PRG1     | RNPEP    |
| SDC2     | SDC2     | SDC2     | SDF2         | SEMA3C   | SEMA3C   |
| SEMA5A   | SERPINA3 | SERPINA5 | SERPINB1     | SERPINB1 | SERPINE1 |
| SERPINE1 | SERPINF1 | SERPINH1 | SGCB         | SGCD     | SGCD     |
| SGCD     | SGCE     | SLIT2    | SLIT3        | SLIT3    | SPARC    |
| SPARCL1  | SPG20    | SPON1    | SPON1        | SPON1    | SPON1    |
| SPON2    | STAG1    | STAG1    | THBS1        | THBS1    | THBS1    |
| THBS2    | THBS4    | TIMP1    | TIMP3        | TIMP3    | TIMP3    |
| TIMP3    | TIMP4    | TNN      | TNXB         | TNXB     | TNXB     |
| TNXB     |          |          |              |          |          |

### *IRCC-HC samples*

s0107 b0318 b0499 s0026 b0370 s0116 b0334 b0512  
s0037 s0205 s0080 b0427 s0077 b0421 s0146 b0428  
b0521 b0336 s0100 b0566 s0086 b0338 b0241 b0374  
s0088 s0170 s0106 s1511 b0664 s0033 b0668

#### 3.3.1 Comparing LAS and IRCC-HC biclusters

|                    | No ECM | ECM3 |
|--------------------|--------|------|
| No ECM3            | 561    | 1    |
| ECM3               | 150    | 133  |
| Jaccard similarity | 0.47   |      |

Table 11: Comparing gene lists: LAS (column) vs. IRCC-HC bicluster (row)

|                    | No ECM | ECM3 |
|--------------------|--------|------|
| No ECM3            | 79     | 8    |
| ECM3               | 4      | 27   |
| Jaccard similarity | 0.69   |      |

Table 12: Comparing sample lists: LAS (column) vs. IRCC-HC bicluster (row)

### 3.4 CCSS bicluster

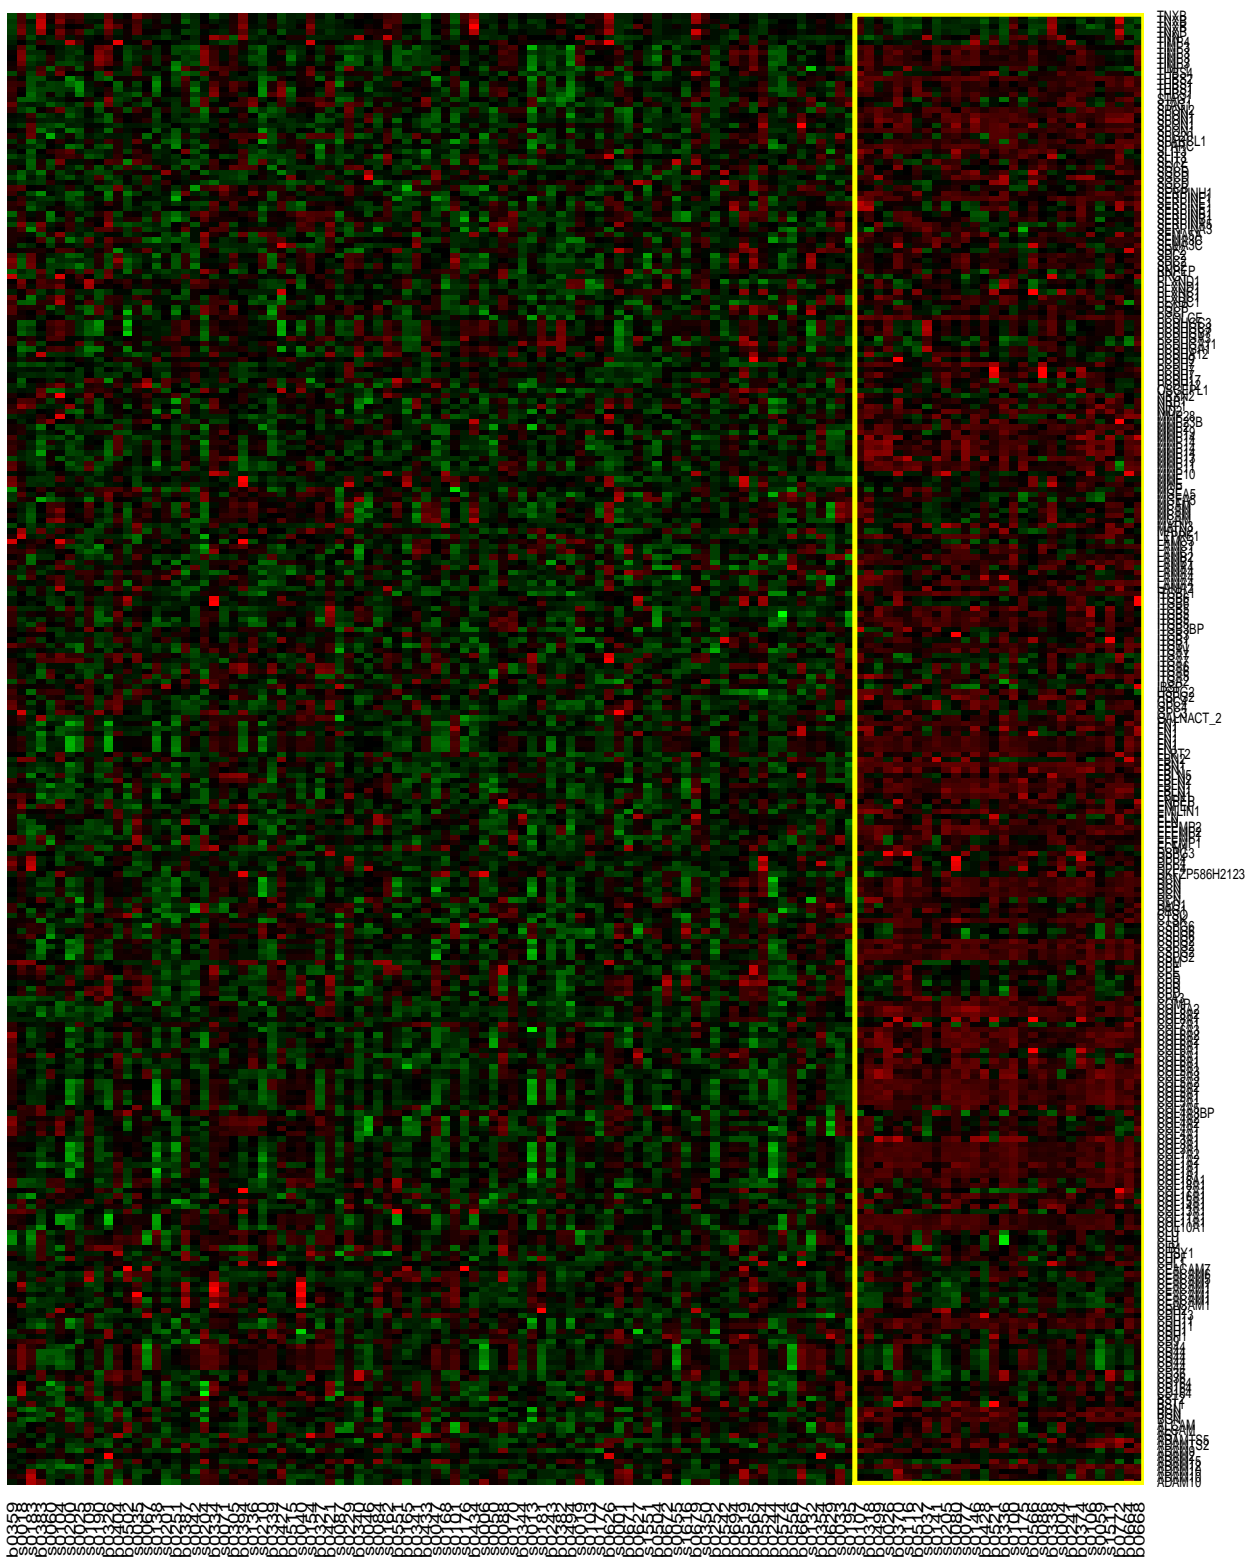

Figure 15: Heatmap of the CCSS bicluster

### 3.4.1 Comparing LAS and CCSS biclusters

|                    | No ECM | ECM3 |
|--------------------|--------|------|
| No ECM3            | 83     | 5    |
| ECM3               | 0      | 30   |
| Jaccard similarity | 0.86   |      |

Table 13: Comparing sample lists: LAS (column) vs. IRCC-2 (row) biclusters

### 3.4.2 Prediction strength for CCSS

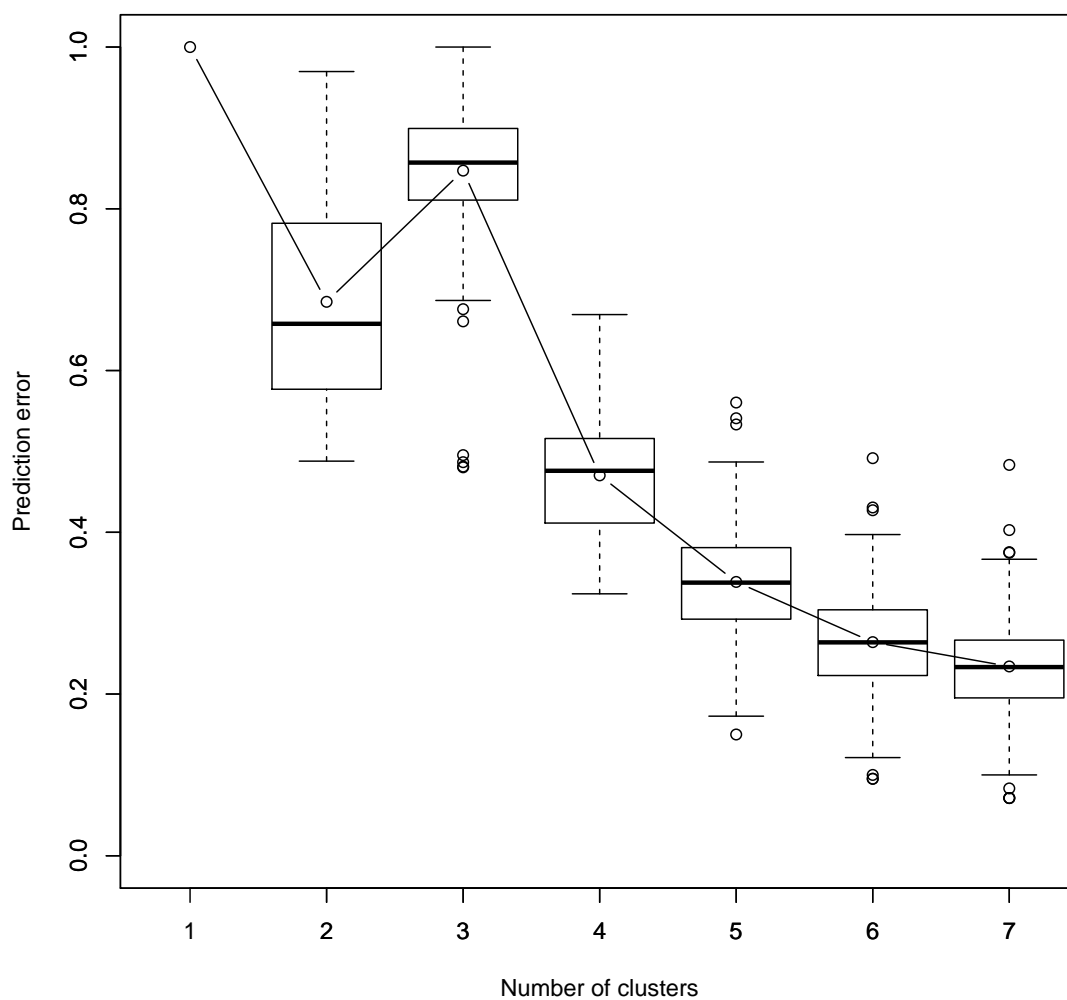



### 3.4.3 Consensus clustering

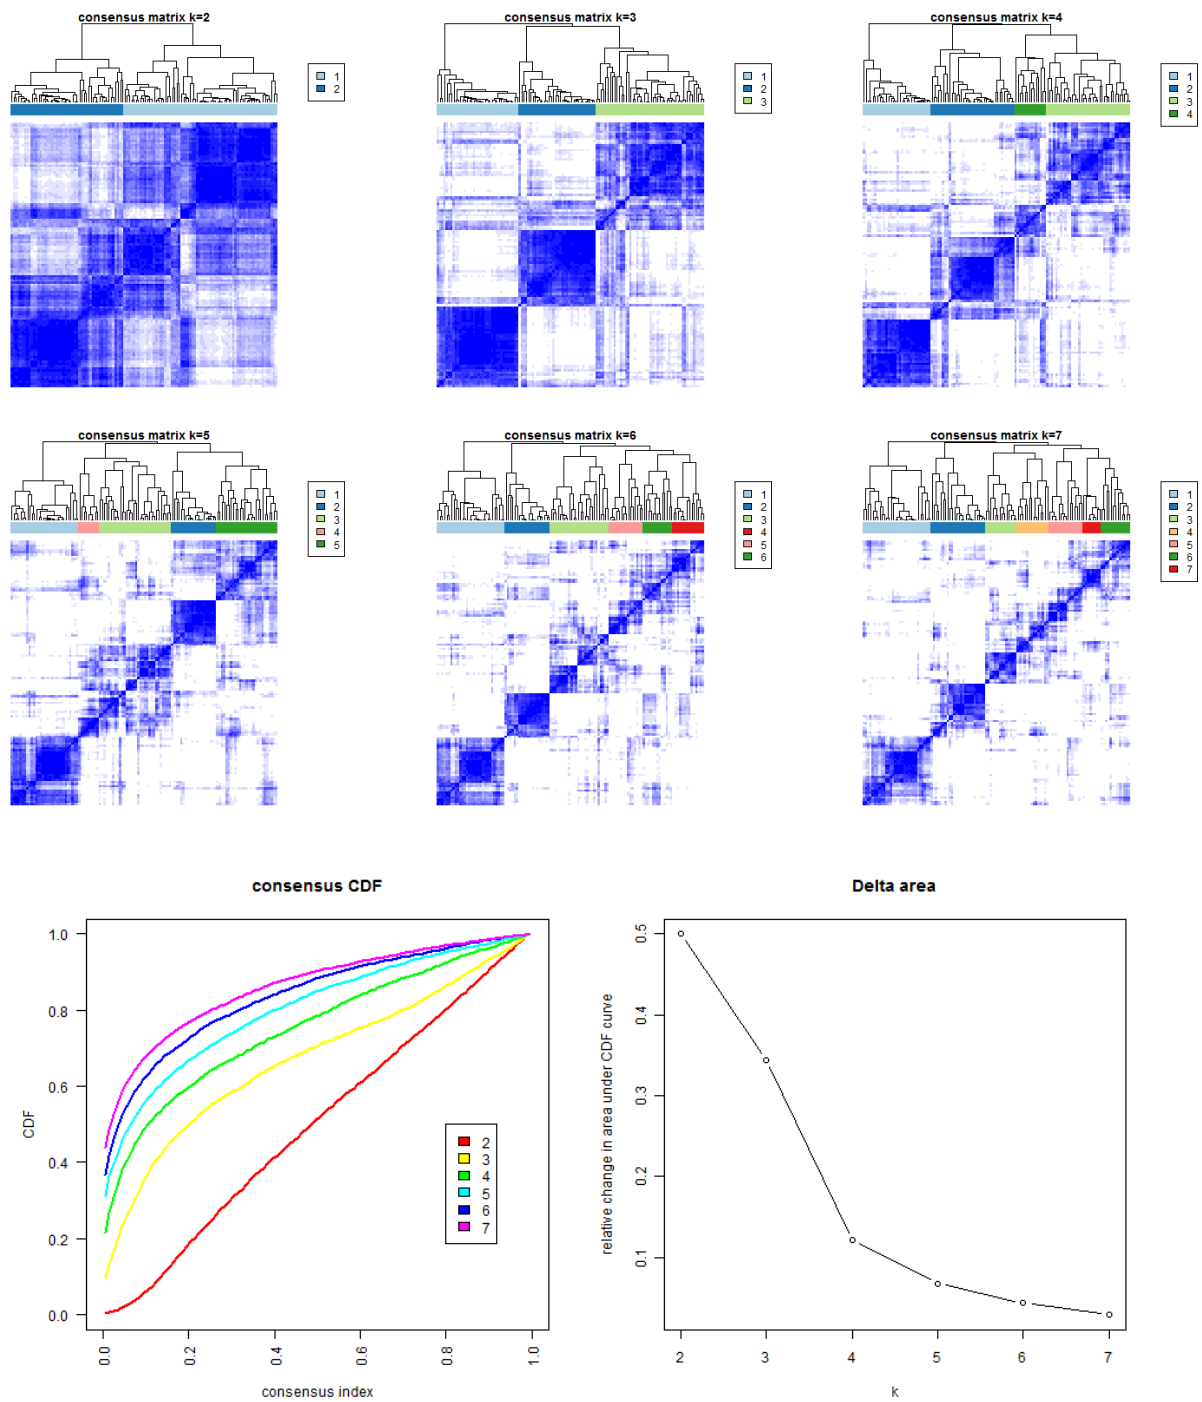

Figure 16: Statistical significance of CCSS clustering (Consensus clustering )

### 3.4.4 Statistical significance

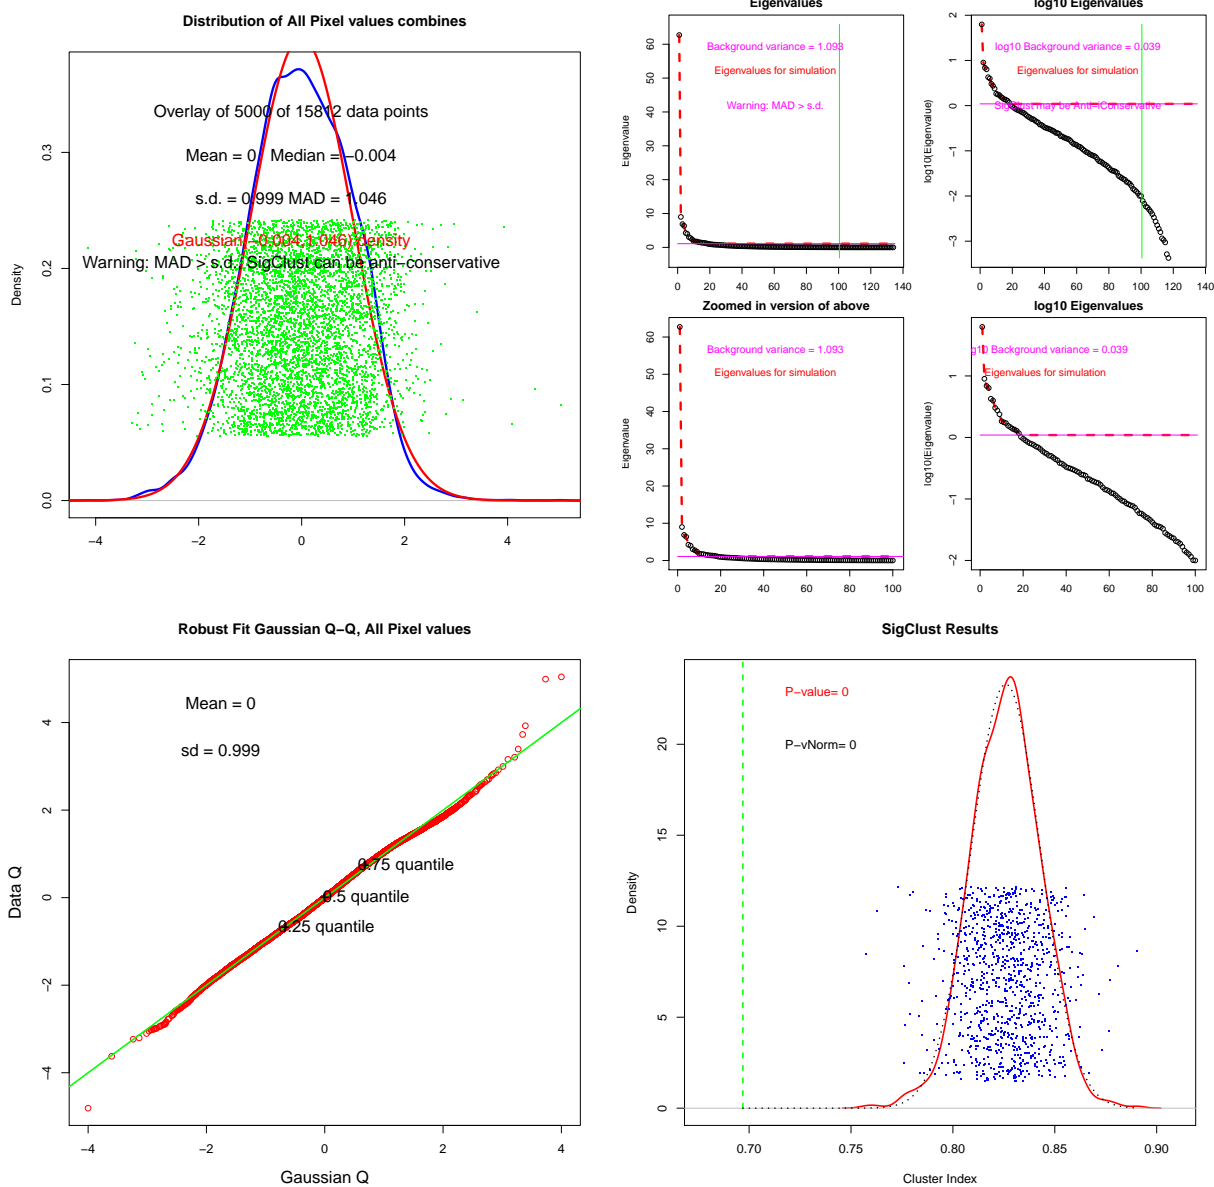

| P-value | P-vNorm |
|---------|---------|
| 0.0E+00 | 2.4E-14 |

Table 14: SigClust p-values

### 3.4.5 Cluster-wise assessment of cluster stability

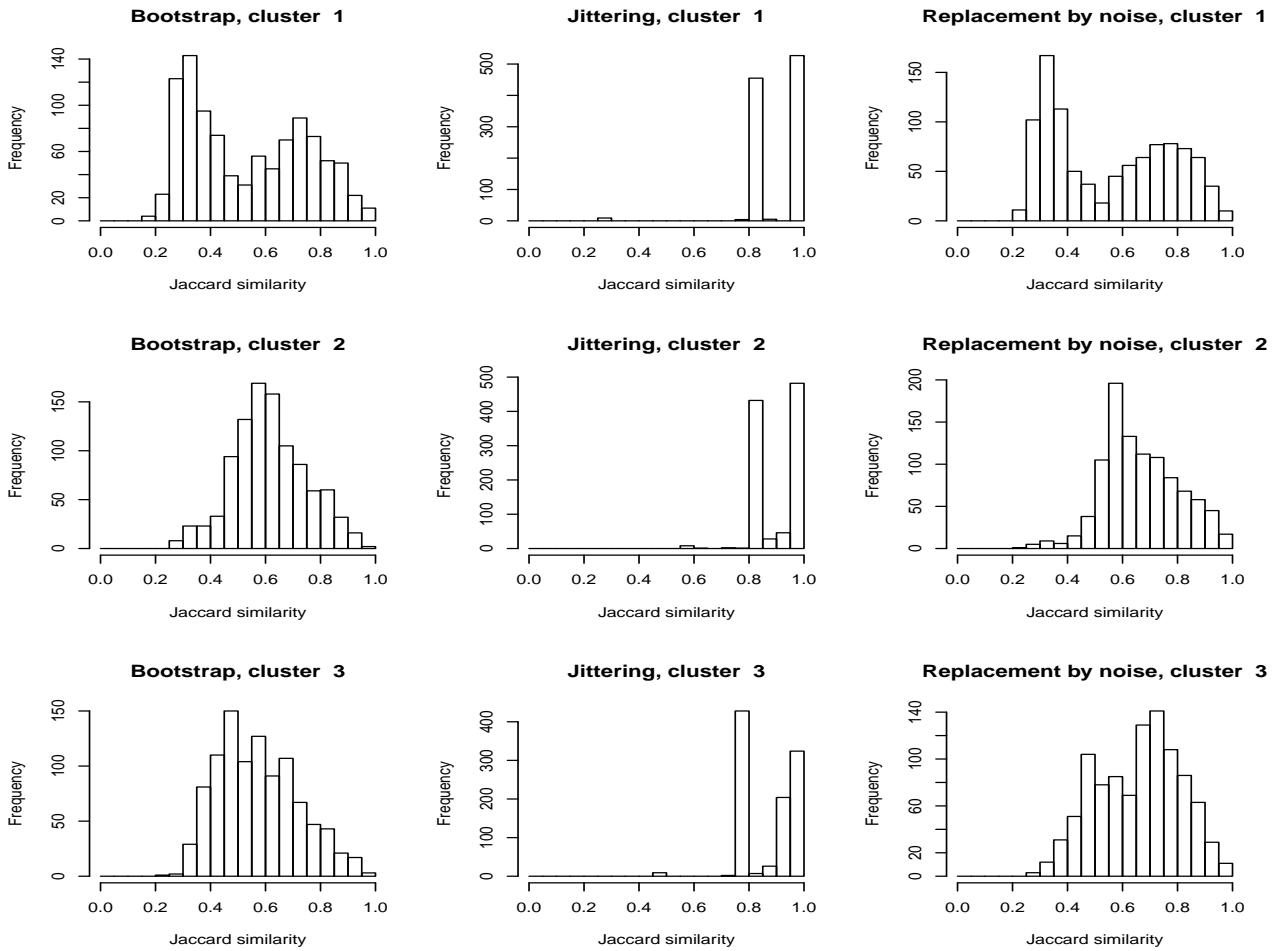

\* Cluster stability assessment \*

Cluster method: kmeans

Full clustering results are given as parameter result of the clusterboot object, which also provides further statistics of the resampling results.

Number of resampling runs: 1000

Number of clusters found in data: 3

Clusterwise Jaccard bootstrap mean:

[1] 0.5352050 0.6171207 0.5754993

dissolved:

[1] 501 181 373

recovered:

[1] 208 169 131

Clusterwise Jaccard jittering mean:

[1] 0.9151124 0.8961530 0.8692155

dissolved:

[1] 9 0 9

recovered:

```

[1] 991 989 989
Clusterwise Jaccard replacement by noise mean:
[1] 0.5563464 0.6676355 0.6586267
dissolved:
[1] 480 74 201
recovered:
[1] 260 272 297

```

*Removing one sample*

```

Min. 1st Qu. Median Mean 3rd Qu. Max.
0.8750 1.0000 1.0000 0.9924 1.0000 1.0000

```

*Removing one gene*

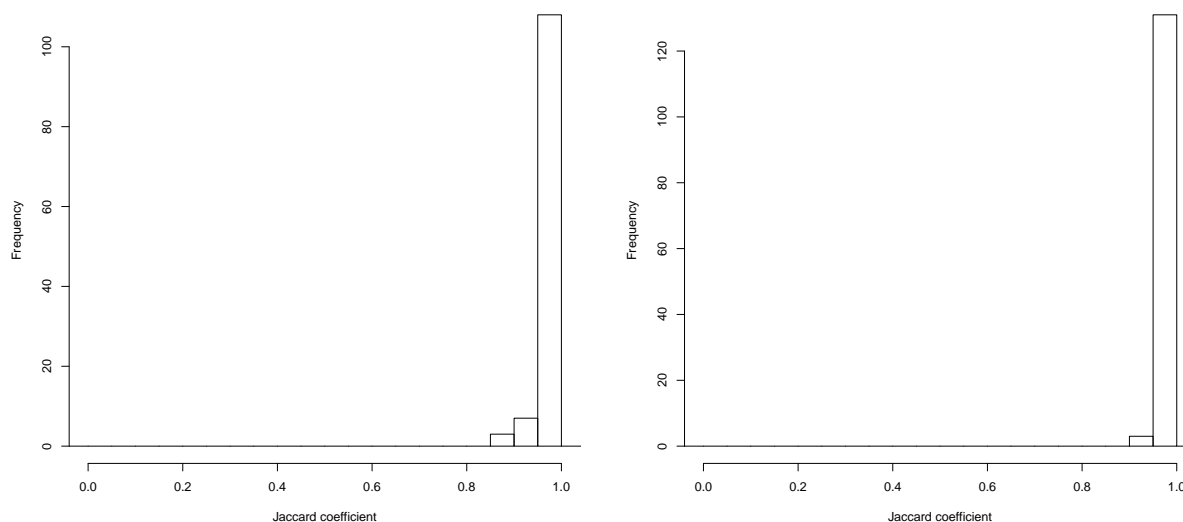

Figure 17: Removing one sample (left) and one gene (right) at a time: distributions of Jaccard coefficients

```

Min. 1st Qu. Median Mean 3rd Qu. Max.
0.9394 1.0000 1.0000 0.9951 1.0000 1.0000

```

| APN            | AD            | ADM           | FOM            |
|----------------|---------------|---------------|----------------|
| Min. :0.3492   | Min. :14.74   | Min. :6.578   | Min. :0.6077   |
| 1st Qu.:0.3492 | 1st Qu.:14.74 | 1st Qu.:6.578 | 1st Qu.:0.7276 |
| Median :0.3492 | Median :14.74 | Median :6.578 | Median :0.8593 |
| Mean :0.3492   | Mean :14.74   | Mean :6.578   | Mean :0.8351   |
| 3rd Qu.:0.3492 | 3rd Qu.:14.74 | 3rd Qu.:6.578 | 3rd Qu.:0.9301 |
| Max. :0.3492   | Max. :14.74   | Max. :6.578   | Max. :0.9893   |

*Removing sets of k genes*

```

Min. 1st Qu. Median Mean 3rd Qu. Max.
0.7941 0.8857 0.9118 0.9166 0.9412 1.0000

```

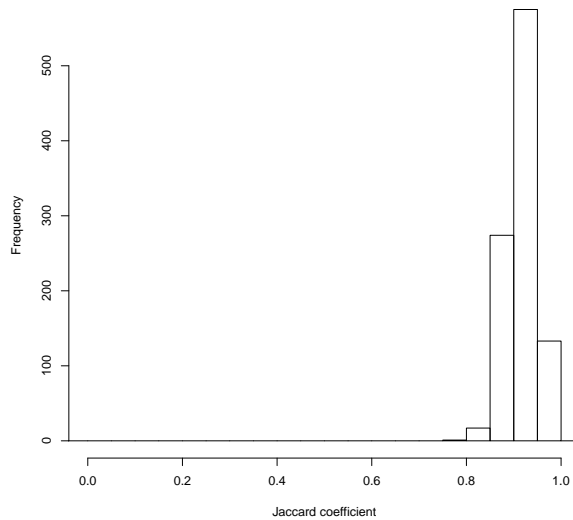

Figure 18: Removing two thirds of the genes: distribution of Jaccard coefficients

### 3.4.6 Validation measures

Clustering Methods:

kmeans

Cluster sizes:

2 3 4 5 6

Validation Measures:

|        |              | 2       | 3        | 4        | 5        | 6        |
|--------|--------------|---------|----------|----------|----------|----------|
| kmeans | APN          | 0.0415  | 0.0042   | 0.0656   | 0.0866   | 0.2005   |
|        | AD           | 0.9580  | 0.9338   | 0.9060   | 0.8707   | 0.8668   |
|        | ADM          | 0.6142  | 0.0585   | 0.7094   | 0.9381   | 1.8927   |
|        | FOM          | 0.8307  | 0.7572   | 0.7383   | 0.7278   | 0.7187   |
|        | Connectivity | 88.5385 | 155.1917 | 166.7317 | 172.5540 | 182.4409 |
|        | Dunn         | 0.2086  | 0.2214   | 0.2086   | 0.2421   | 0.2437   |
|        | Silhouette   | 0.0686  | 0.0370   | 0.0356   | 0.0461   | 0.0373   |

Optimal Scores:

|              | Score   | Method | Clusters |
|--------------|---------|--------|----------|
| APN          | 0.0042  | kmeans | 3        |
| AD           | 0.8668  | kmeans | 6        |
| ADM          | 0.0585  | kmeans | 3        |
| FOM          | 0.7187  | kmeans | 6        |
| Connectivity | 88.5385 | kmeans | 2        |
| Dunn         | 0.2437  | kmeans | 6        |
| Silhouette   | 0.0686  | kmeans | 2        |

## 4 Perou et al. (2000) dataset

### 4.1 LAS bicluster

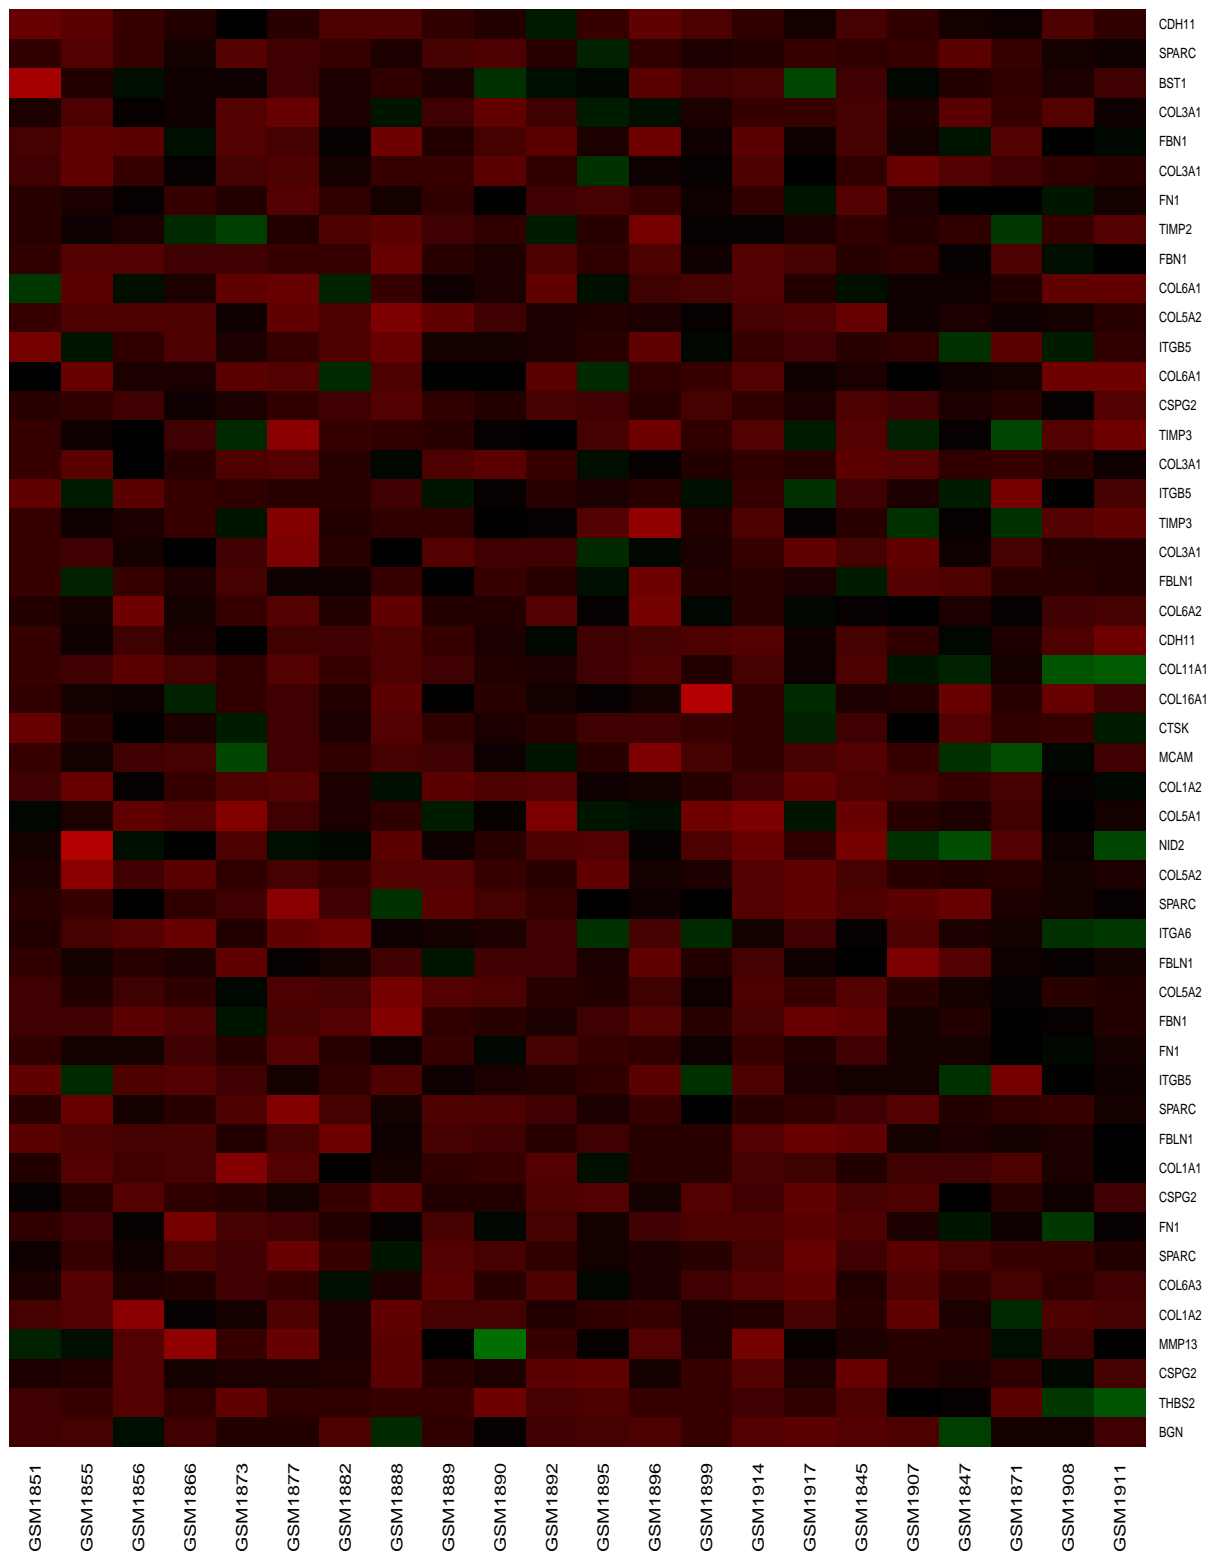

Figure 19: Heatmap of the LAS bicluster

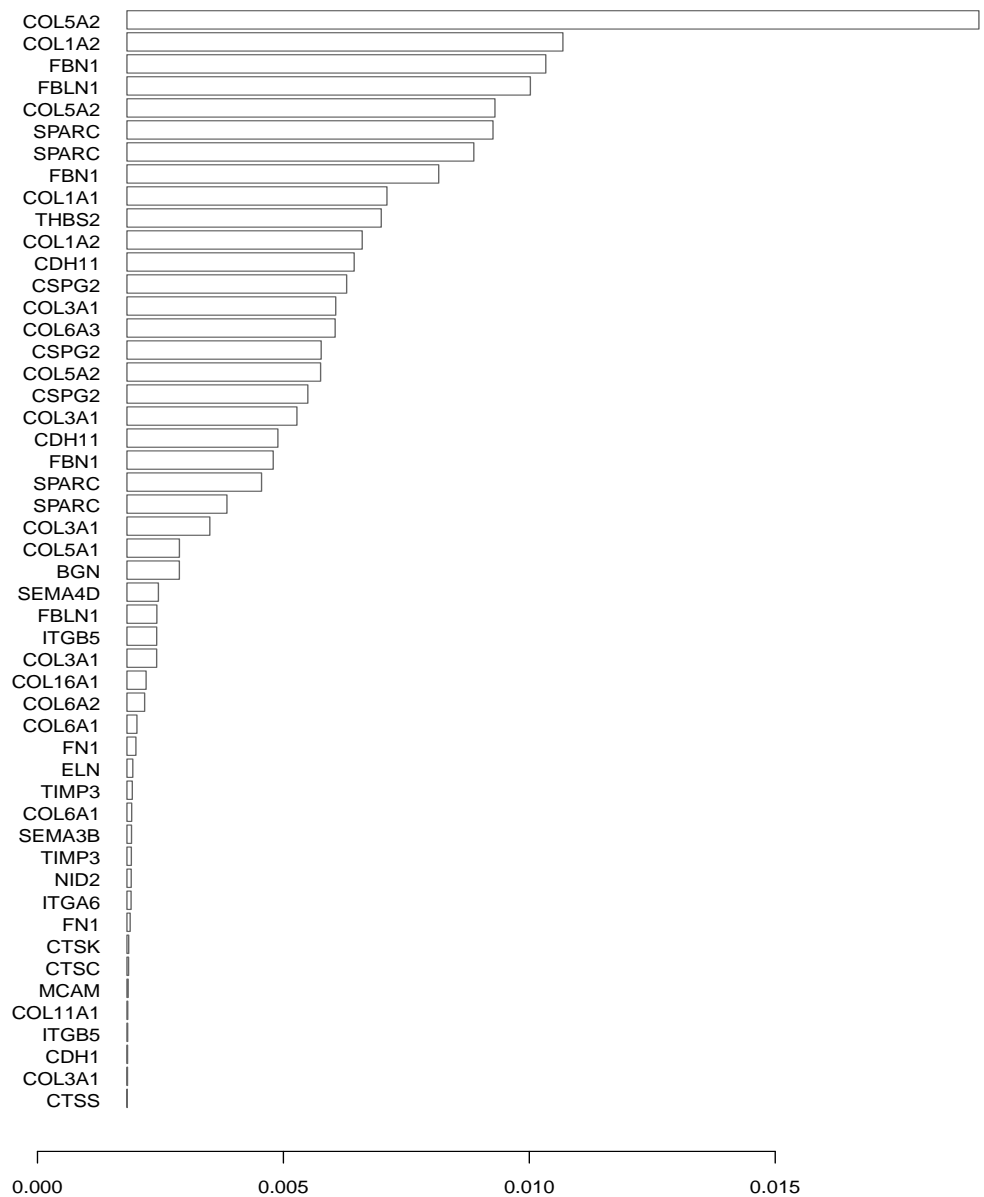

Figure 20: Most informative genes for the LAS bicluster

Number of informative genes of the LAS bicluster that also belong to the ECM3 consensus list: 19 of 34 (56%)

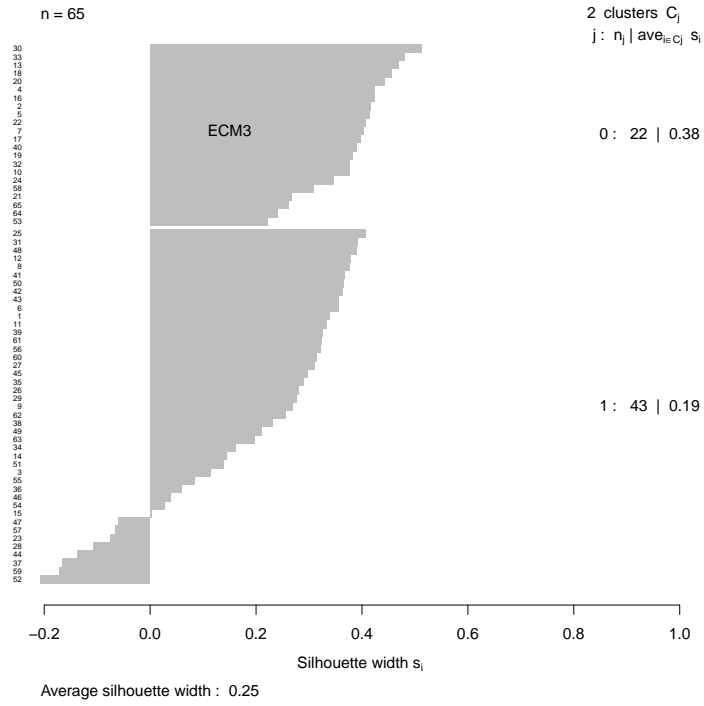

Figure 21: Silhouette plot for the LAS bicluster

| Connectivity | Dunn Index |
|--------------|------------|
| 17.95        | 0.19       |

Table 15: Connectivity validation measure and Dunn Index of LAS partitioning



## 4.2 IRCC-KM bicluster

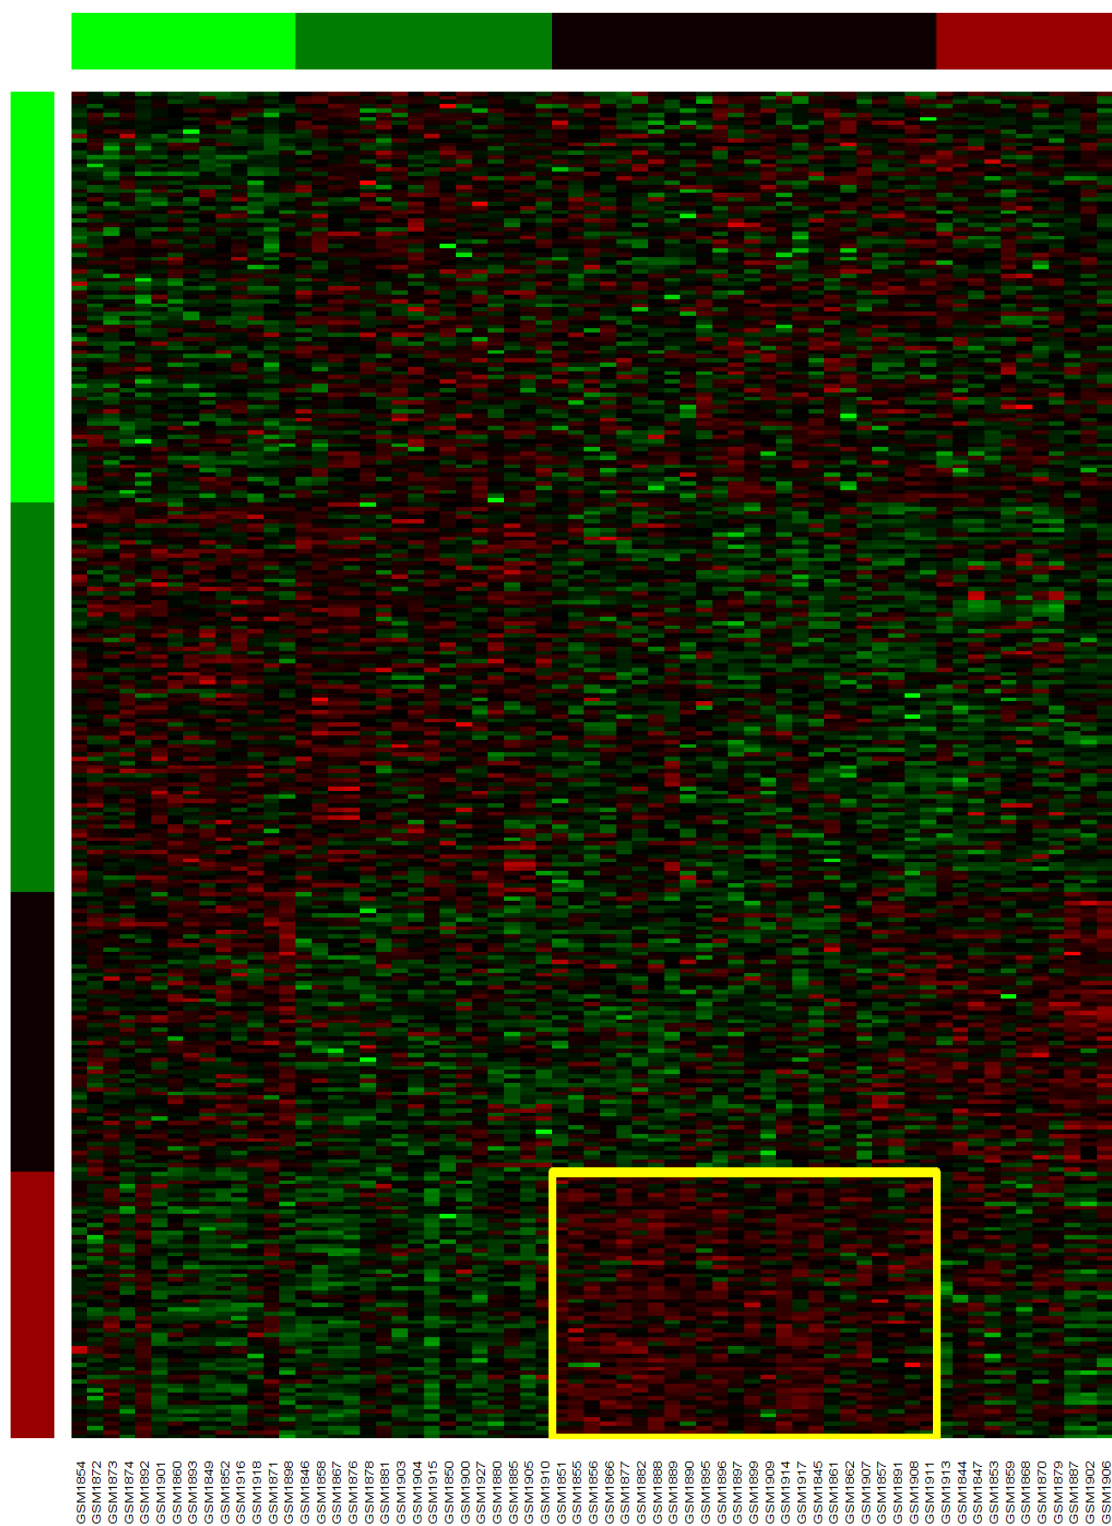

Figure 22: Heatmap of the IRCC-KM bicluster

*IRCC-KM genes*

|        |         |        |        |        |        |          |         |
|--------|---------|--------|--------|--------|--------|----------|---------|
| BGN    | THBS2   | CSPG2  | MMP13  | COL1A2 | COL6A3 | SERPING1 | SPARC   |
| FN1    | CSPG2   | COL1A1 | FBLN1  | SPARC  | ITGB5  | FN1      | FN1     |
| FBN1   | COL3A1  | COL5A2 | FBLN1  | ITGA6  | ITGA6  | SPARC    | COL5A2  |
| FN1    | NID2    | COL5A1 | COL6A2 | COL1A2 | MCAM   | CTSK     | COL16A1 |
| THBS1  | COL11A1 | CDH11  | COL6A2 | FBLN1  | ITGAV  | COL3A1   | ITGAV   |
| SPON1  | MMP3    | TIMP3  | ITGB5  | FBLN2  | COL3A1 | TIMP3    | CSPG2   |
| COL6A1 | ITGB5   | COL5A2 | COL6A1 | FBN1   | TIMP2  | SERPING1 | FN1     |
| COL3A1 | FBN1    | COL3A1 | MMP9   | BST1   | SPARC  | CDH11    |         |

*IRCC-KM samples*

|         |         |         |         |         |         |         |         |
|---------|---------|---------|---------|---------|---------|---------|---------|
| GSM1851 | GSM1855 | GSM1856 | GSM1866 | GSM1877 | GSM1882 | GSM1888 | GSM1889 |
| GSM1890 | GSM1895 | GSM1896 | GSM1897 | GSM1899 | GSM1909 | GSM1914 | GSM1917 |
| GSM1845 | GSM1861 | GSM1862 | GSM1907 | GSM1857 | GSM1891 | GSM1908 | GSM1911 |

**4.2.1 Comparing LAS and IRCC-KM biclusters**

|                    | No ECM | ECM3 |
|--------------------|--------|------|
| No ECM3            | 255    | 0    |
| ECM3               | 14     | 49   |
| Jaccard similarity | 0.78   |      |

Table 16: Comparing gene lists: LAS (column) vs. IRCC-KM bicluster (row)

|                    | No ECM | ECM3 |
|--------------------|--------|------|
| No ECM3            | 37     | 4    |
| ECM3               | 6      | 18   |
| Jaccard similarity | 0.64   |      |

Table 17: Comparing sample lists: LAS (column) vs. IRCC-KM bicluster (row)

### 4.3 IRCC-HC bicluster

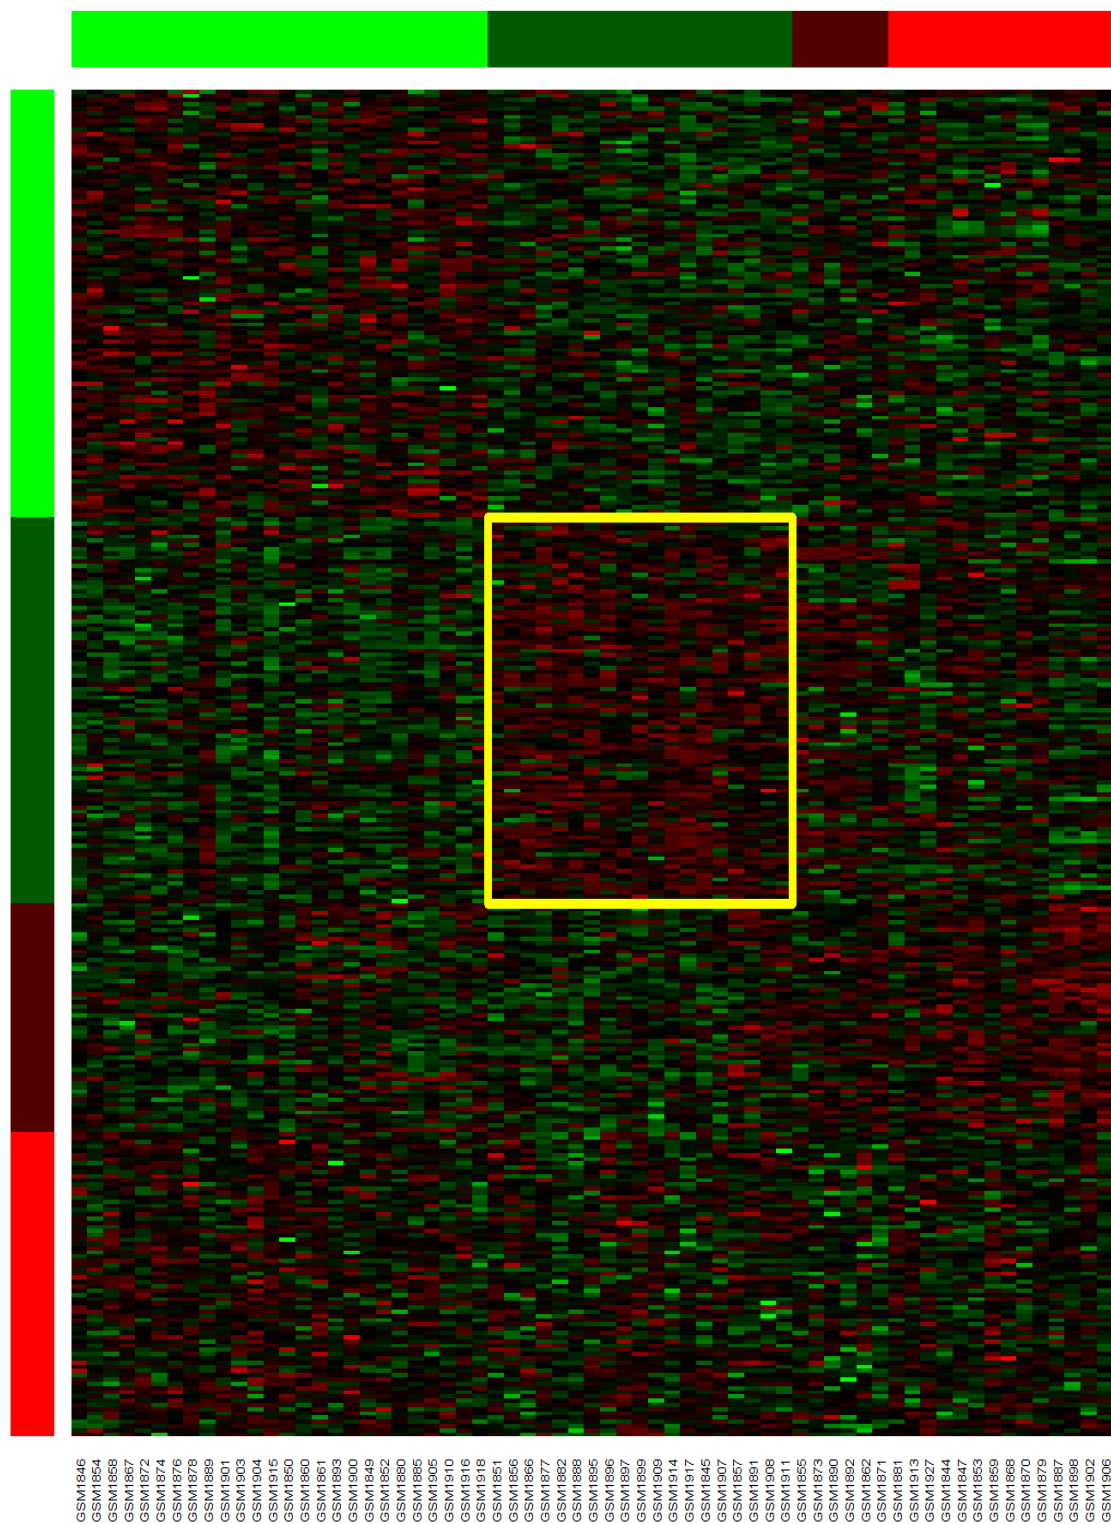

Figure 23: Heatmap of the IRCC-HC bicluster

*IRCC-HC genes*

|         |         |         |          |          |          |        |        |
|---------|---------|---------|----------|----------|----------|--------|--------|
| APP     | BGN     | BST1    | CDH11    | CDH11    | CDH13    | CDH13  | CDH8   |
| CNTN1   | COL11A1 | COL16A1 | COL1A1   | COL1A2   | COL1A2   | COL3A1 | COL3A1 |
| COL3A1  | COL3A1  | COL3A1  | COL4A1   | COL4A1   | COL4A1   | COL4A1 | COL4A2 |
| COL5A1  | COL5A2  | COL5A2  | COL5A2   | COL6A1   | COL6A1   | COL6A2 | COL6A3 |
| CSPG2   | CSPG2   | CSPG2   | CSPG4    | CTSD     | CTSE     | CTSK   | ECM1   |
| FBLN1   | FBLN1   | FBLN1   | FBLN2    | FBN1     | FBN1     | FBN1   | FN1    |
| FN1     | FN1     | FN1     | FN1      | ITGA2    | ITGA2    | ITGA3  | ITGA3  |
| ITGA6   | ITGA6   | ITGAV   | ITGAV    | ITGB1    | ITGB1    | ITGB5  | ITGB5  |
| ITGB5   | LAMC1   | MCAM    | MMP13    | MMP3     | MMP9     | NID2   | NRP2   |
| PCDHGC3 | PLXNA2  | SDC2    | SERPINA7 | SERPINE1 | SERPINF1 | SGCB   | SPARC  |
| SPARC   | SPARC   | SPARC   | SPON1    | THBS1    | THBS1    | THBS2  | TIMP2  |
| TIMP3   | TIMP3   | TNXB    |          |          |          |        |        |

*IRCC-HC samples*

GSM1851 GSM1856 GSM1866 GSM1877 GSM1882 GSM1888 GSM1895 GSM1896  
 GSM1897 GSM1899 GSM1909 GSM1914 GSM1917 GSM1845 GSM1907 GSM1857  
 GSM1891 GSM1908 GSM1911

**4.3.1 Comparing LAS and IRCC-HC biclusters**

|                    | No ECM | ECM3 |
|--------------------|--------|------|
| No ECM3            | 227    | 0    |
| ECM3               | 42     | 49   |
| Jaccard similarity | 0.54   |      |

Table 18: Comparing gene lists: LAS (column) vs. IRCC-HC bicluster (row)

|                    | No ECM | ECM3 |
|--------------------|--------|------|
| No ECM3            | 39     | 7    |
| ECM3               | 4      | 15   |
| Jaccard similarity | 0.58   |      |

Table 19: Comparing sample lists: LAS (column) vs. IRCC-HC bicluster (row)

## 4.4 CCSS bicluster

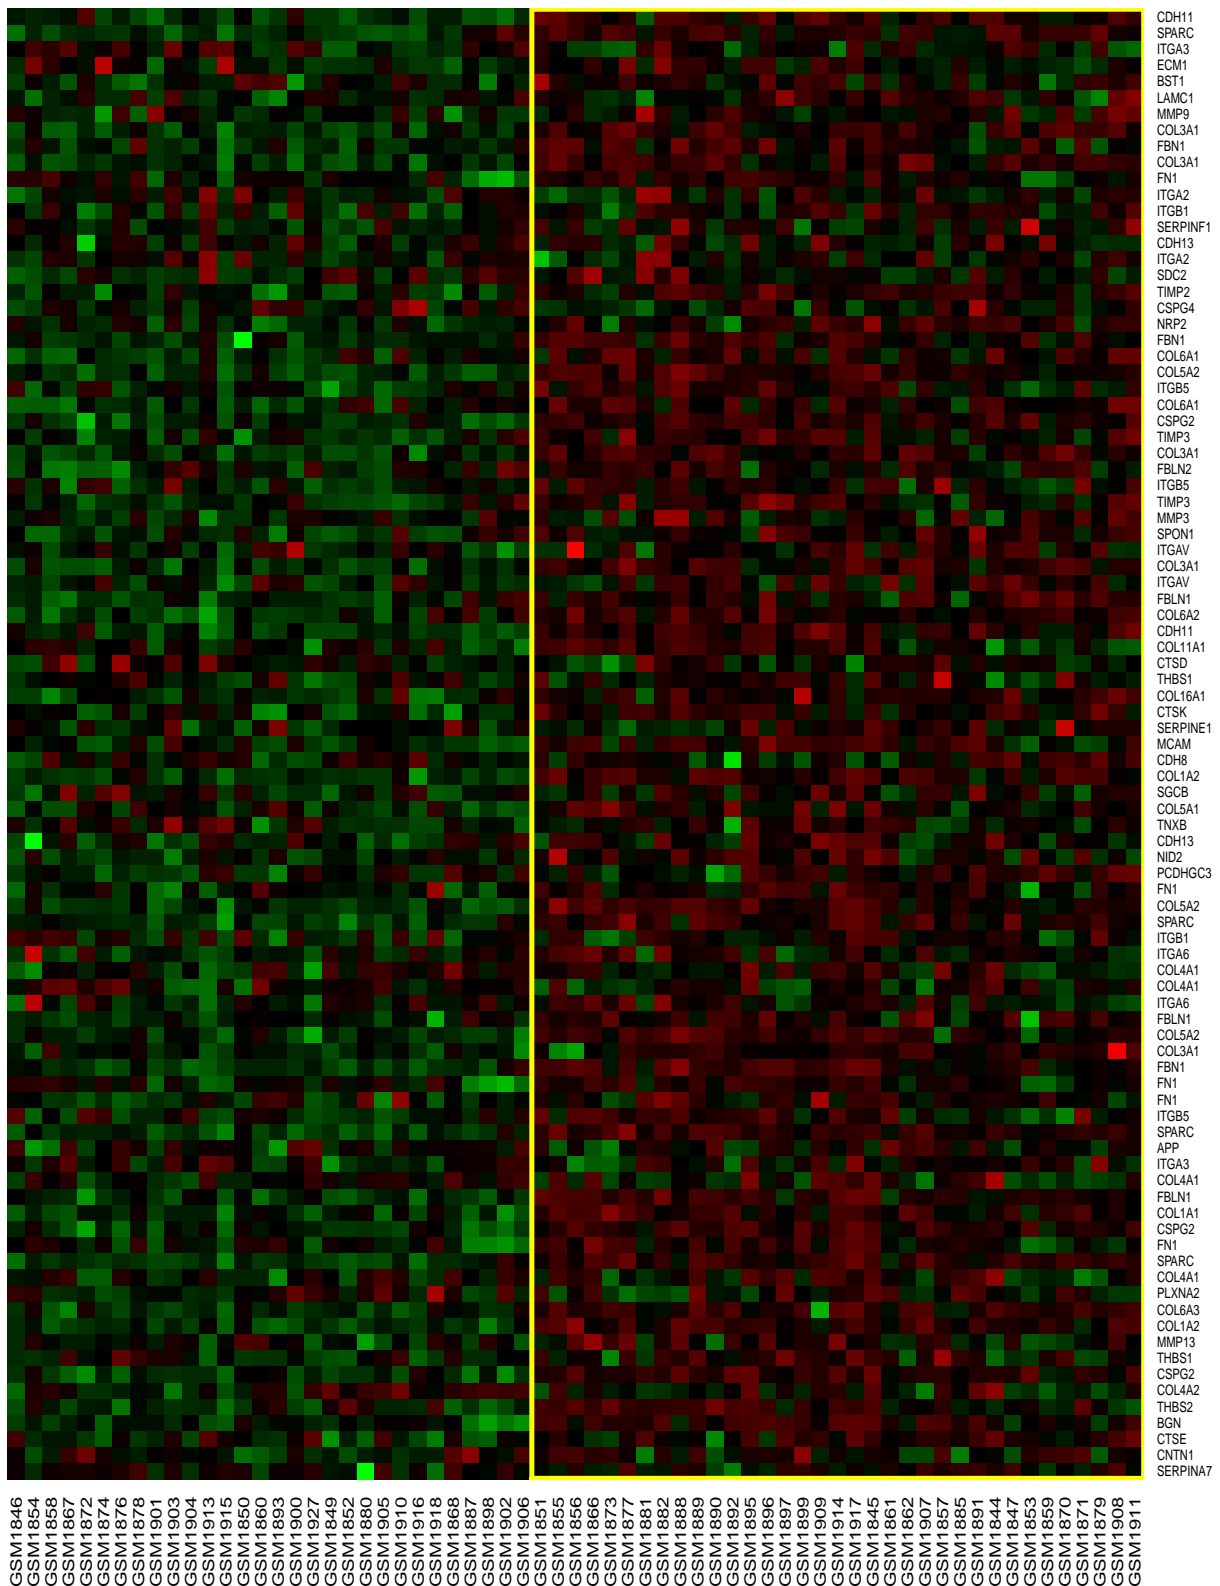

Figure 24: Heatmap of the CCSS bicluster

#### 4.4.1 Comparing LAS and CCSS biclusters

|                    | No ECM | ECM3 |
|--------------------|--------|------|
| No ECM3            | 30     | 0    |
| ECM3               | 13     | 22   |
| Jaccard similarity | 0.63   |      |

Table 20: Comparing sample lists: LAS (column) vs. CCSS (row) biclusters

#### 4.4.2 Prediction strength for CCSS

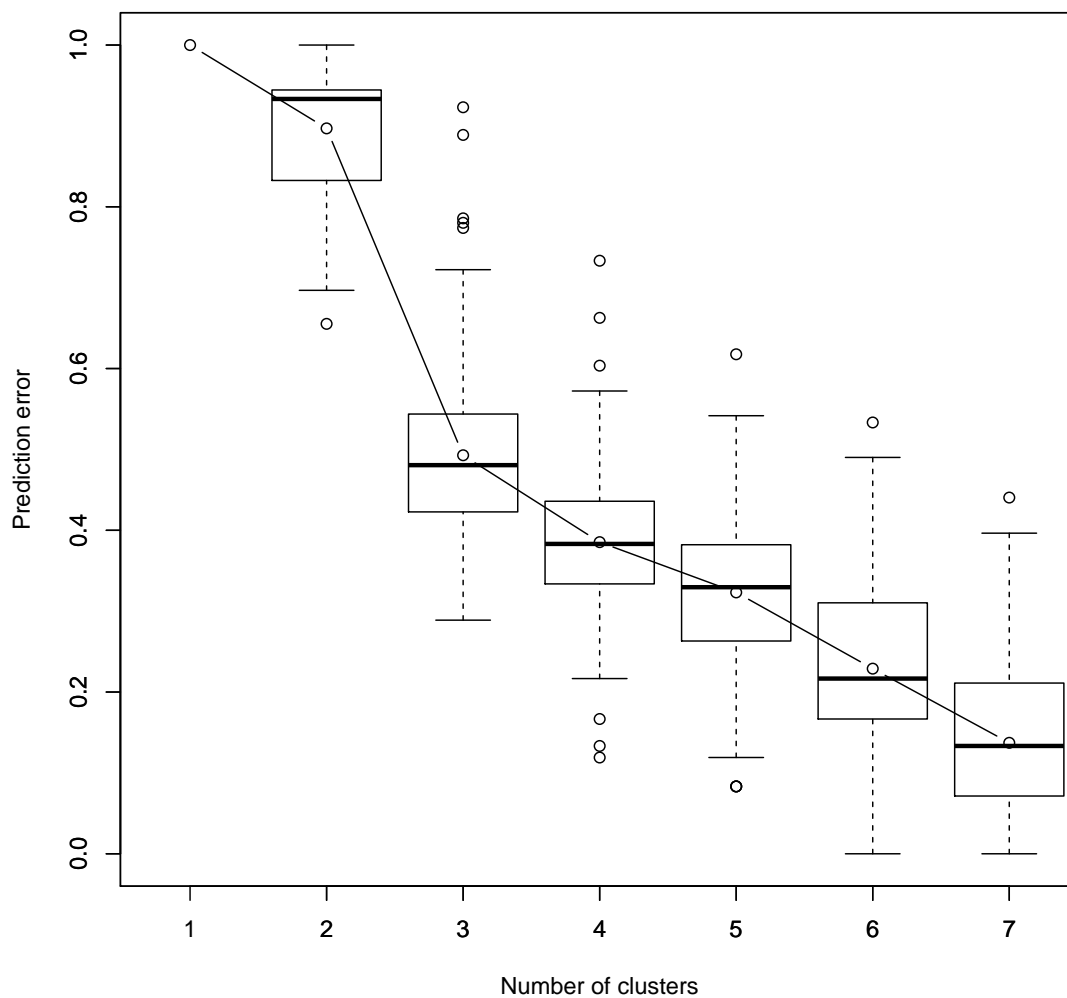

### 4.4.3 Consensus clustering

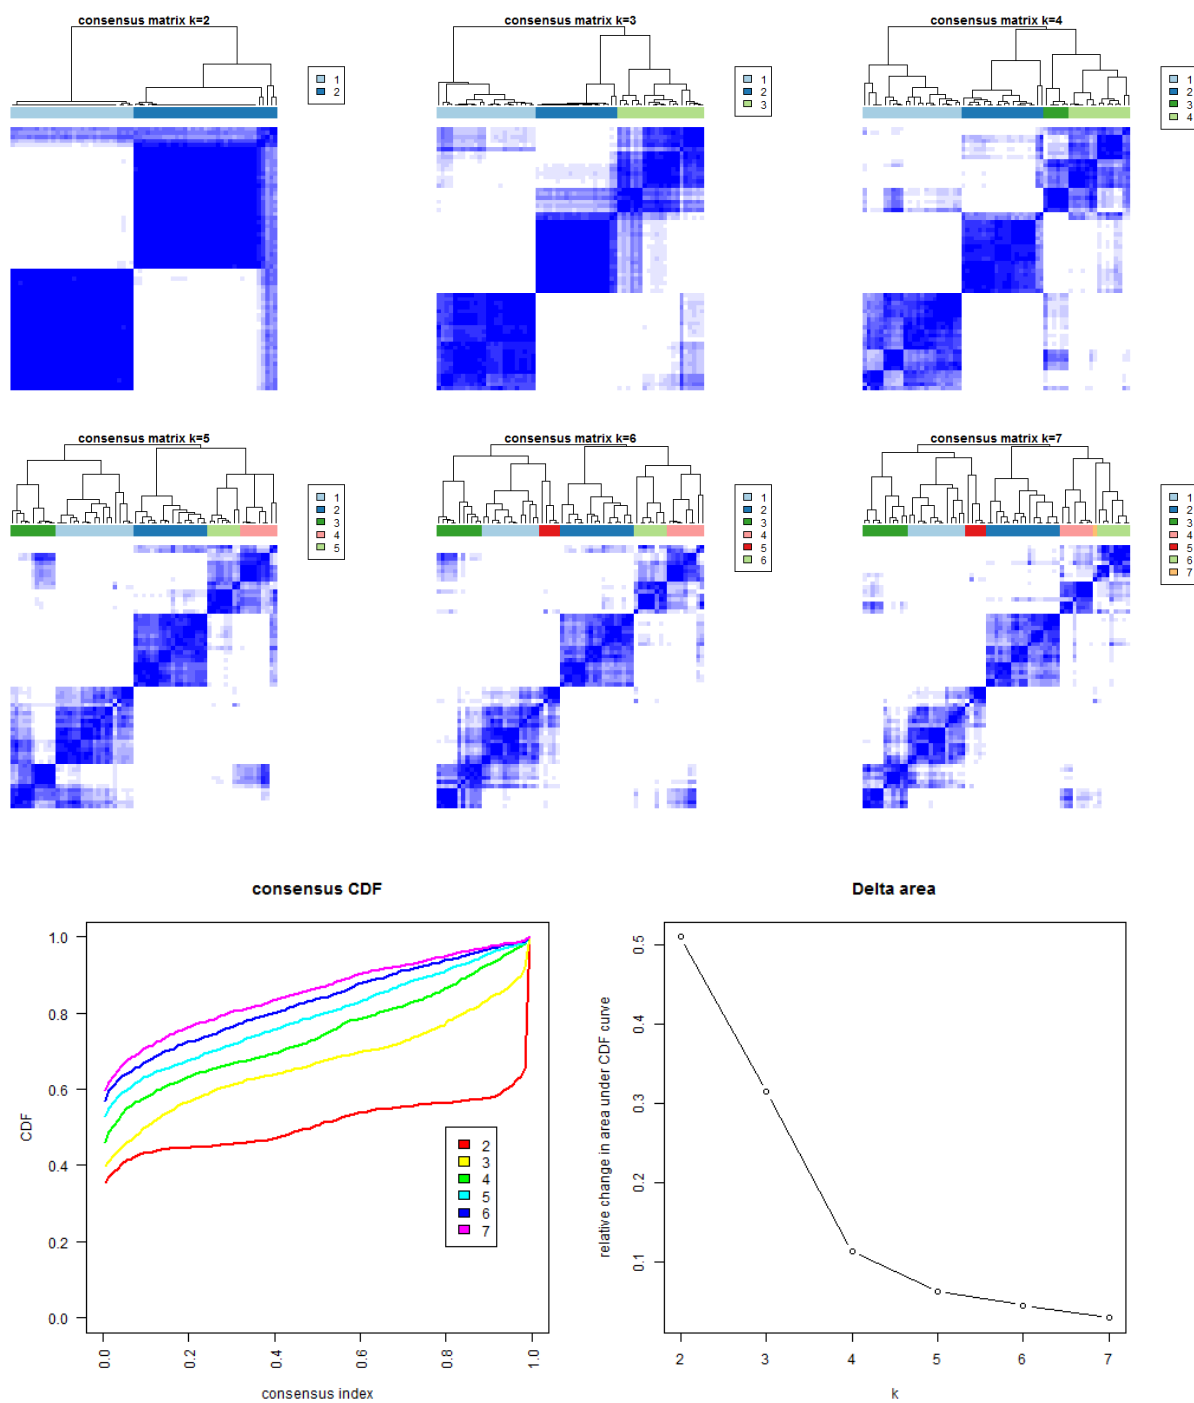

Figure 25: Statistical significance of CCSS clustering (Consensus clustering )

#### 4.4.4 Statistical significance

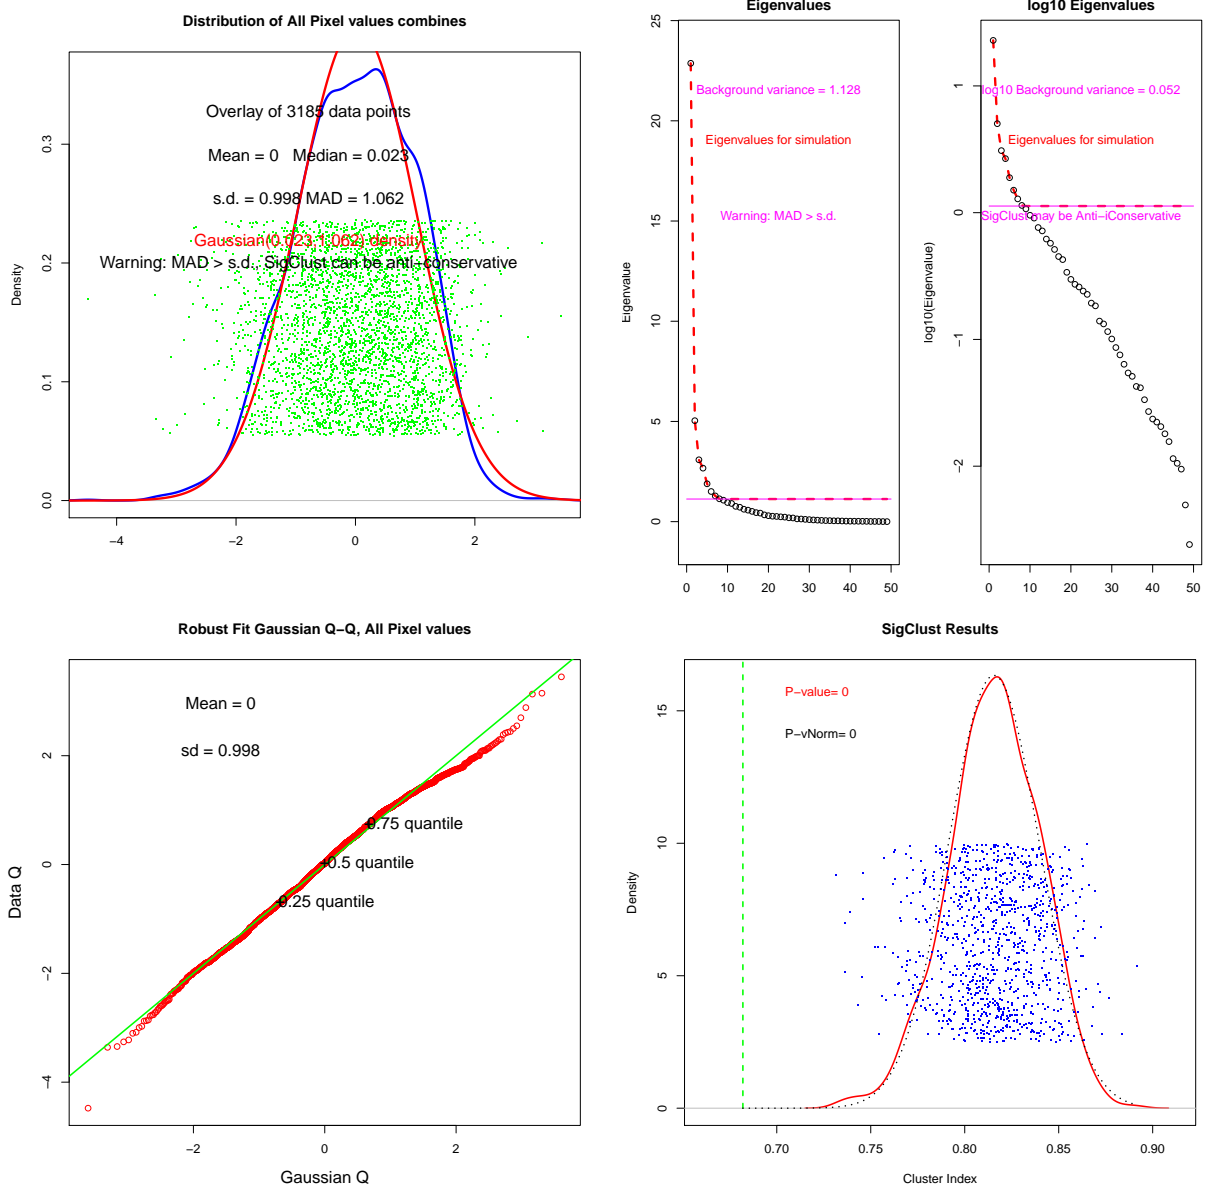

| P-value | P-vNorm |
|---------|---------|
| 0.0E+00 | 2.3E-08 |

Table 21: SigClust p-values



#### 4.4.5 Cluster-wise assessment of cluster stability

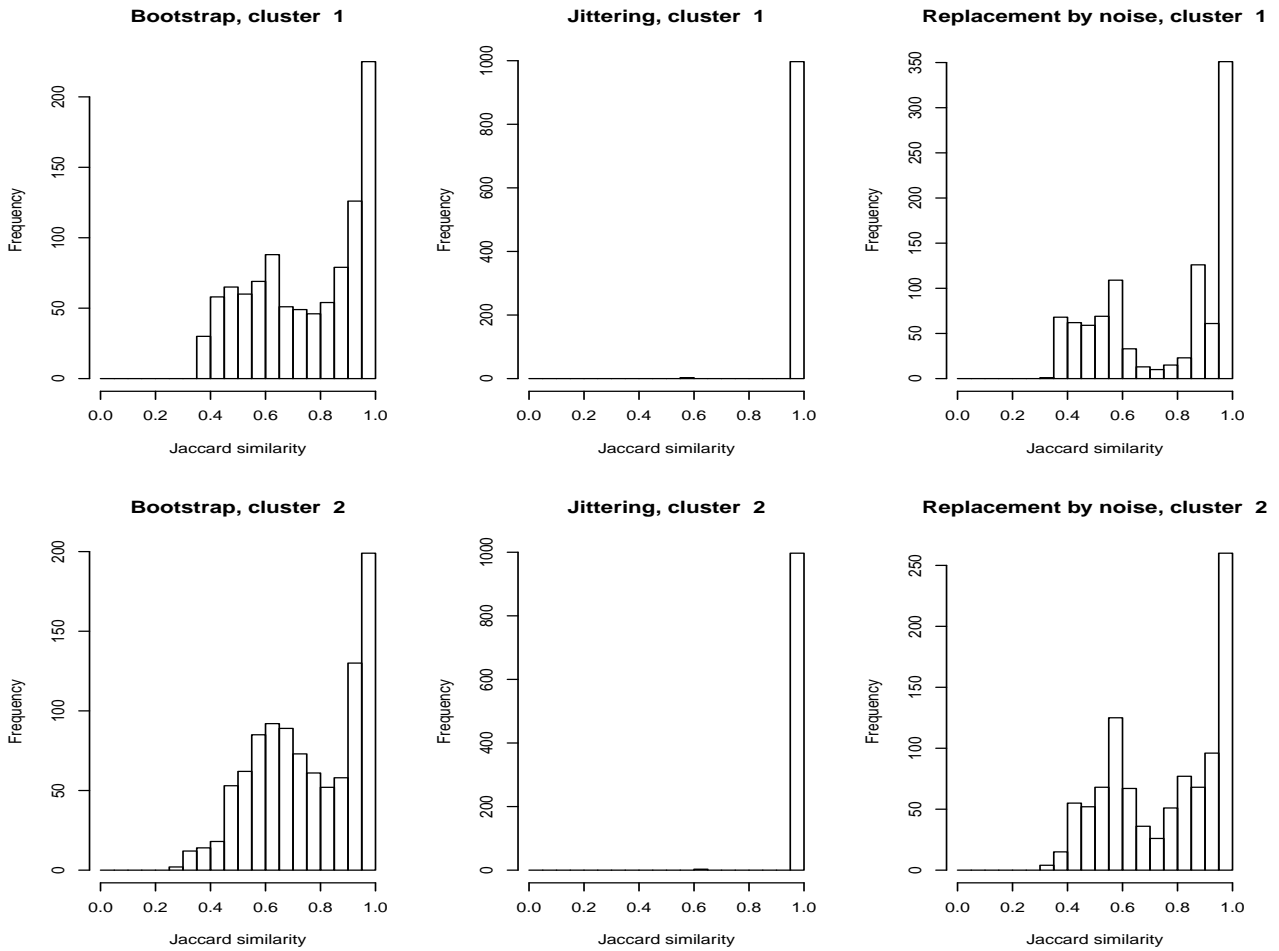

\* Cluster stability assessment \*

Cluster method: kmeans

Full clustering results are given as parameter result of the clusterboot object, which also provides further statistics of the resampling results.

Number of resampling runs: 1000

Number of clusters found in data: 2

Clusterwise Jaccard bootstrap mean:

[1] 0.7579851 0.7579400

dissolved:

[1] 153 99

recovered:

[1] 530 500

Clusterwise Jaccard jittering mean:

[1] 0.9987586 0.9988750

dissolved:

[1] 0 0

recovered:

```

[1] 997 997
Clusterwise Jaccard replacement by noise mean:
[1] 0.7614243 0.7630827
dissolved:
[1] 190 126
recovered:
[1] 576 552

```

*Removing one sample*

| Min.   | 1st Qu. | Median | Mean   | 3rd Qu. | Max.   |
|--------|---------|--------|--------|---------|--------|
| 0.9697 | 1.0000  | 1.0000 | 0.9941 | 1.0000  | 1.0000 |

*Removing one gene*

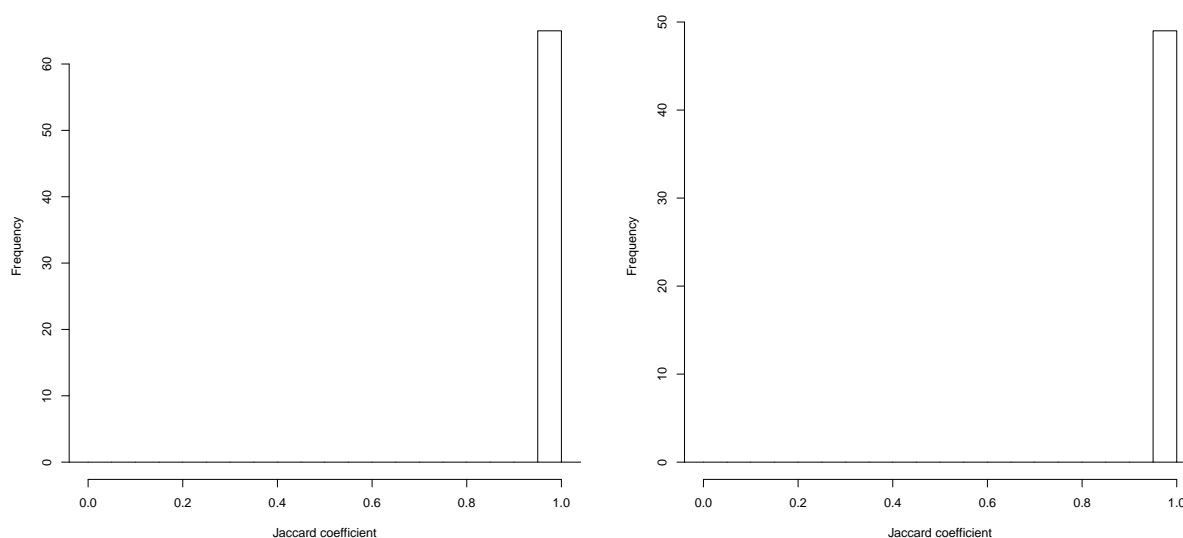

Figure 26: Removing one sample (left) and one gene (right) at a time: distributions of Jaccard coefficients

| Min.   | 1st Qu. | Median | Mean   | 3rd Qu. | Max.   |
|--------|---------|--------|--------|---------|--------|
| 0.9706 | 0.9714  | 1.0000 | 0.9865 | 1.0000  | 1.0000 |

| APN     |         | AD      |        | ADM     |        | FOM     |         |
|---------|---------|---------|--------|---------|--------|---------|---------|
| Min.    | :0.2519 | Min.    | :8.306 | Min.    | :2.478 | Min.    | :0.5847 |
| 1st Qu. | :0.2662 | 1st Qu. | :8.349 | 1st Qu. | :2.665 | 1st Qu. | :0.7072 |
| Median  | :0.2662 | Median  | :8.349 | Median  | :2.665 | Median  | :0.8328 |
| Mean    | :0.2684 | Mean    | :8.355 | Mean    | :2.684 | Mean    | :0.8130 |
| 3rd Qu. | :0.2791 | 3rd Qu. | :8.387 | 3rd Qu. | :2.807 | 3rd Qu. | :0.8998 |
| Max.    | :0.2791 | Max.    | :8.387 | Max.    | :2.807 | Max.    | :0.9886 |

*Removing sets of k genes*

| Min.   | 1st Qu. | Median | Mean   | 3rd Qu. | Max.   |
|--------|---------|--------|--------|---------|--------|
| 0.5714 | 0.8684  | 0.9118 | 0.8981 | 0.9412  | 1.0000 |

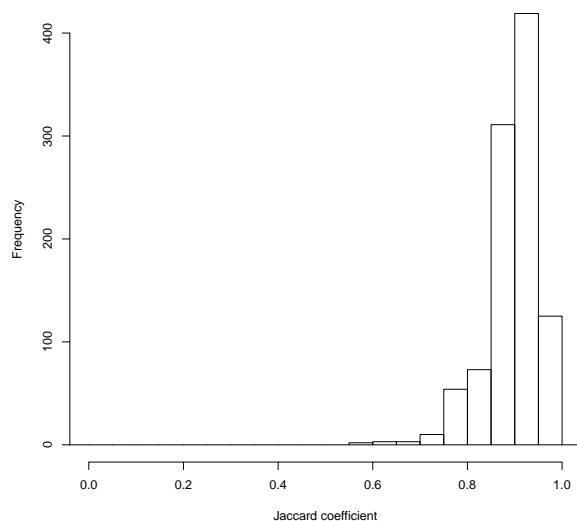

Figure 27: Removing two thirds of the genes: distribution of Jaccard coefficients

#### 4.4.6 Validation measures

Clustering Methods:

kmeans

Cluster sizes:

2 3 4 5 6

Validation Measures:

|        |              | 2       | 3       | 4       | 5       | 6       |
|--------|--------------|---------|---------|---------|---------|---------|
| kmeans | APN          | 0.0140  | 0.0272  | 0.1325  | 0.1264  | 0.1242  |
|        | AD           | 7.6754  | 7.1799  | 7.0374  | 6.6685  | 6.5174  |
|        | ADM          | 0.1559  | 0.2487  | 1.0008  | 0.9022  | 0.8359  |
|        | FOM          | 0.8130  | 0.7705  | 0.7644  | 0.7333  | 0.7242  |
|        | Connectivity | 10.2766 | 24.3758 | 28.1075 | 35.2214 | 38.0075 |
|        | Dunn         | 0.3951  | 0.4836  | 0.4418  | 0.5190  | 0.5306  |
|        | Silhouette   | 0.2902  | 0.1801  | 0.1582  | 0.1697  | 0.1666  |

Optimal Scores:

|              | Score   | Method | Clusters |
|--------------|---------|--------|----------|
| APN          | 0.0140  | kmeans | 2        |
| AD           | 6.5174  | kmeans | 6        |
| ADM          | 0.1559  | kmeans | 2        |
| FOM          | 0.7242  | kmeans | 6        |
| Connectivity | 10.2766 | kmeans | 2        |
| Dunn         | 0.5306  | kmeans | 6        |
| Silhouette   | 0.2902  | kmeans | 2        |

## 5 Ma et al. (2004) dataset (GDS806)

### 5.1 LAS bicluster

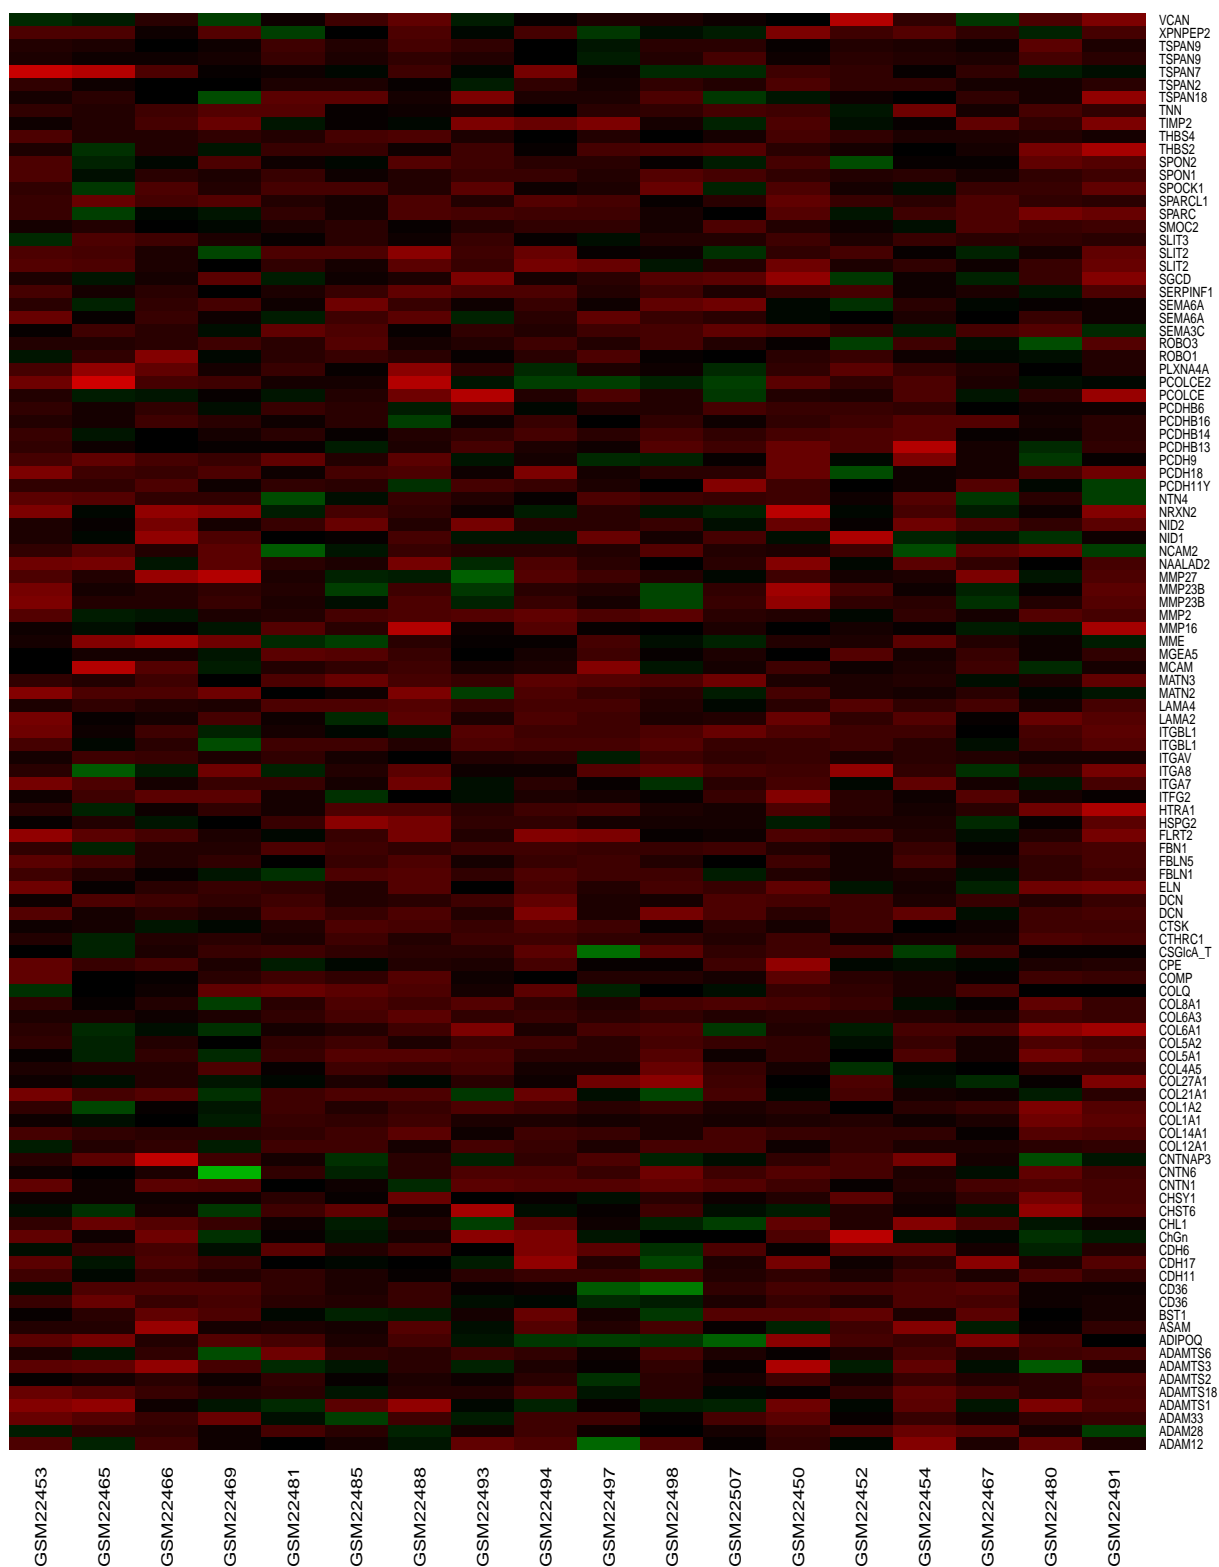

Figure 28: Heatmap of the LAS bicluster

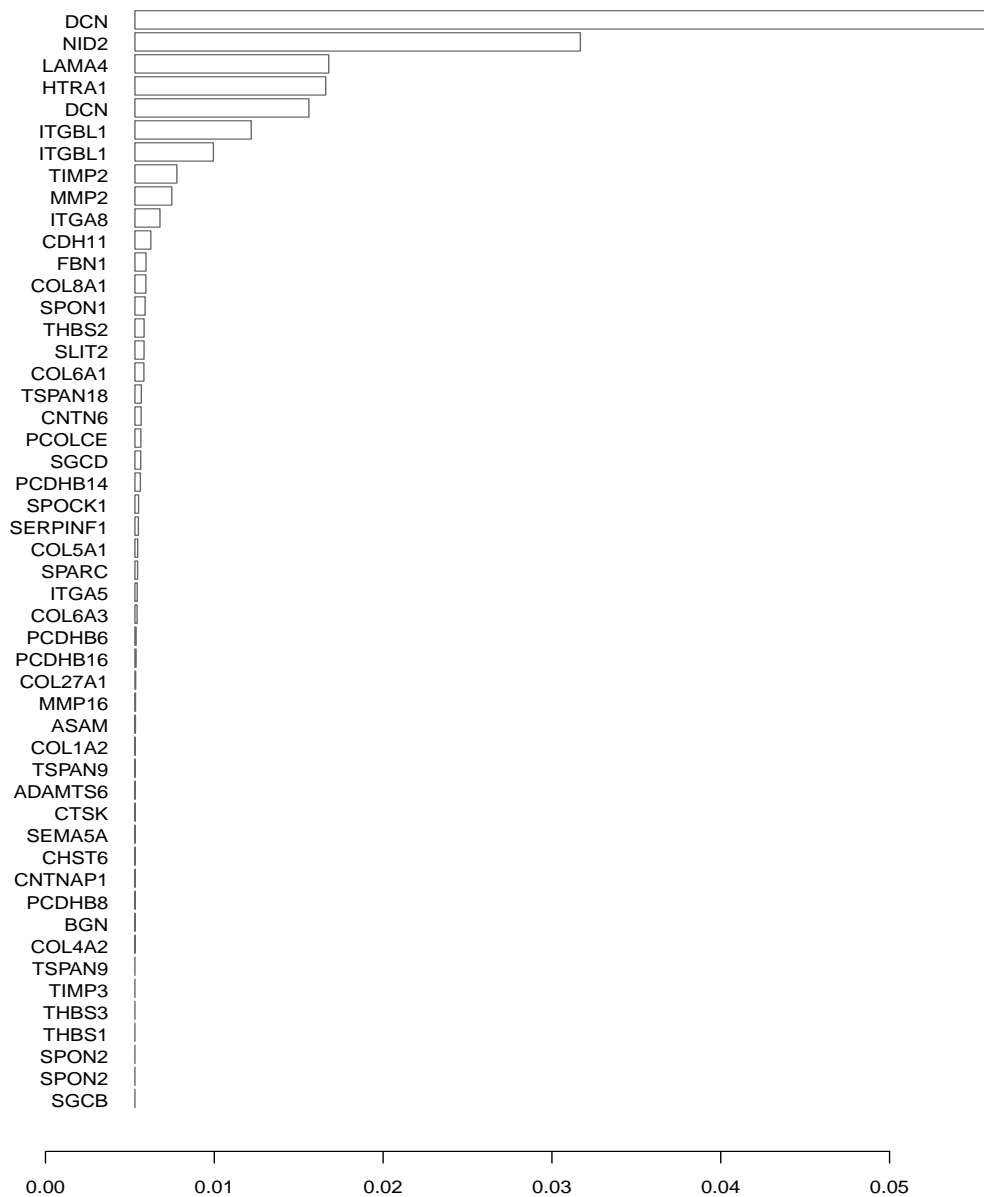

Figure 29: Most informative genes for the LAS bicluster

Number of informative genes of the LAS bicluster that also belong to the ECM3 consensus list: 21 of 34 (62%)

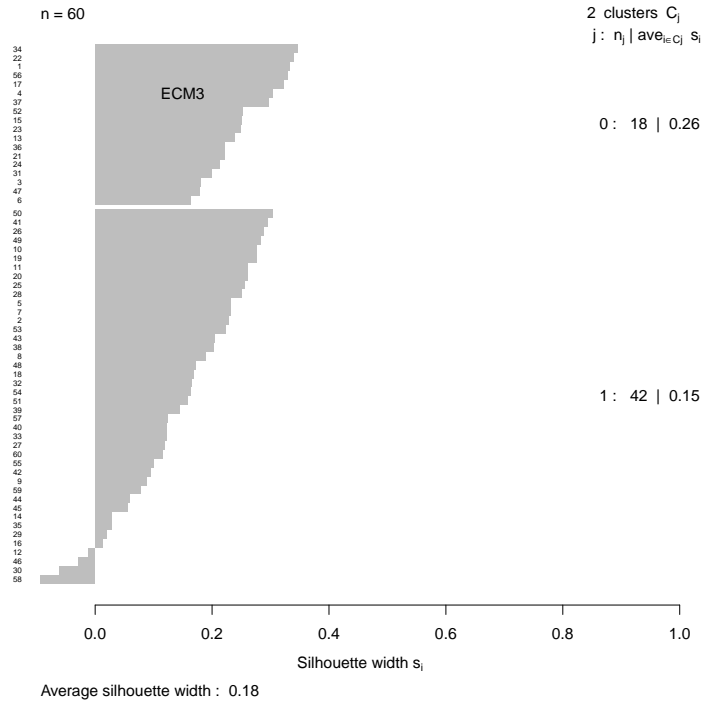

Figure 30: Silhouette plot for the LAS bicluster

| Connectivity | Dunn Index |
|--------------|------------|
| 7.42         | 0.53       |

Table 22: Connectivity validation measure and Dunn Index of LAS partitioning

## 5.2 IRCC-KM bicluster

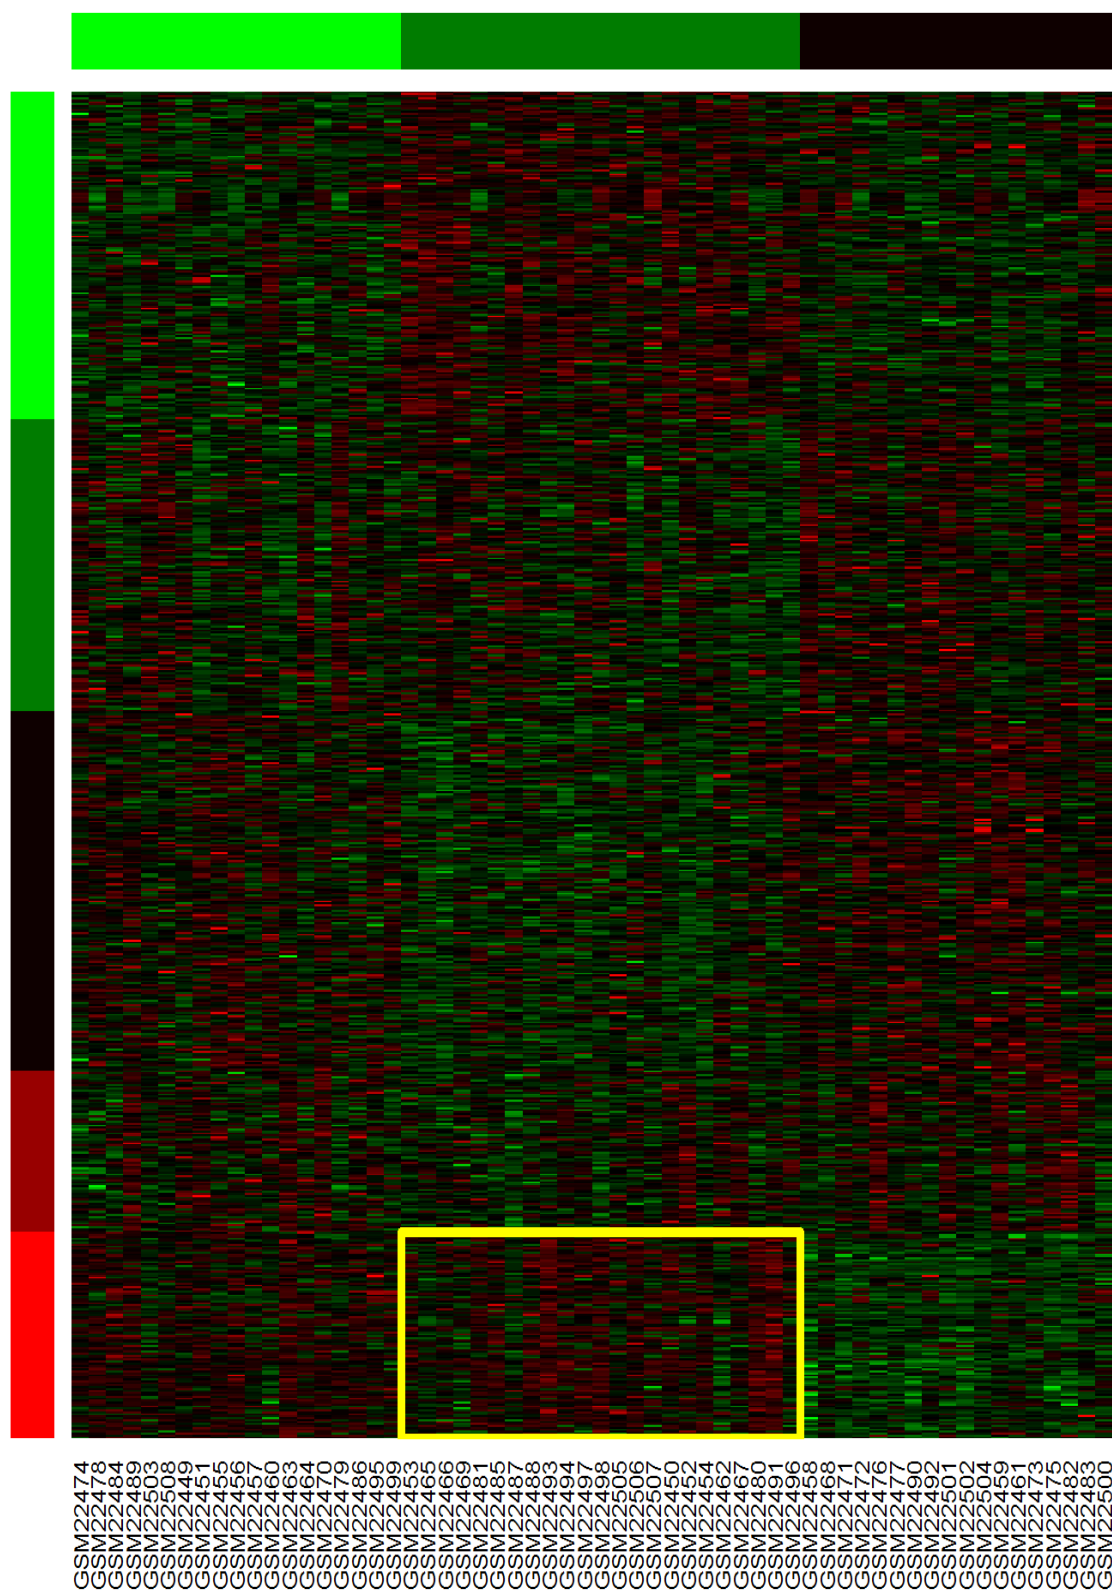

Figure 31: Heatmap of the IRCC-KM bicluster

*IRCC-KM genes*

|         |         |         |          |          |          |         |         |
|---------|---------|---------|----------|----------|----------|---------|---------|
| ADAM12  | ADAM19  | ADAM23  | ADAM7    | ADAMTS12 | ADAMTS2  | ADAMTS4 | ADAMTS6 |
| ASAM    | BGN     | CDH11   | CDH2     | CDH3     | CHST3    | CHST6   | CNTN6   |
| CNTNAP1 | COL10A1 | COL11A1 | COL12A1  | COL13A1  | COL18A1  | COL1A1  | COL1A2  |
| COL27A1 | COL4A1  | COL4A2  | COL5A1   | COL5A2   | COL5A3   | COL6A1  | COL6A3  |
| COL7A1  | COL8A1  | CORIN   | CSG1cA_T | CTHRC1   | CTSK     | DCN     | DCN     |
| EFEMP2  | EMILIN1 | EMILIN1 | FBLN1    | FBLN2    | FBN1     | GPC6    | HABP4   |
| HAS2    | HSPG2   | HTRA1   | ITGA11   | ITGA5    | ITGA8    | ITGB5   | ITGBL1  |
| ITGBL1  | LAMA4   | LEPRE1  | MMP11    | MMP11    | MMP13    | MMP14   | MMP16   |
| MMP2    | MMP28   | NID2    | NRP1     | NRP2     | PCDH7    | PCDHB14 | PCDHB16 |
| PCDHB2  | PCDHB6  | PCDHB7  | PCDHB8   | PCDHGA3  | PCOLCE   | PLXDC2  | PLXNA1  |
| PLXNA2  | PLXNB3  | SEMA3A  | SEMA5A   | SERPINF1 | SERPINH1 | SGCB    | SGCD    |
| SLIT2   | SPARC   | SPG21   | SPOCK1   | SPON1    | SPON2    | SPON2   | THBS1   |
| THBS2   | THBS3   | TIMP2   | TIMP3    | TNC      | TSPAN18  | TSPAN2  | TSPAN9  |
| TSPAN9  | VCAN    |         |          |          |          |         |         |

*IRCC-KM samples*

|          |          |          |          |          |          |          |          |
|----------|----------|----------|----------|----------|----------|----------|----------|
| GSM22453 | GSM22465 | GSM22466 | GSM22469 | GSM22481 | GSM22485 | GSM22487 | GSM22488 |
| GSM22493 | GSM22494 | GSM22497 | GSM22498 | GSM22505 | GSM22506 | GSM22507 | GSM22450 |
| GSM22452 | GSM22454 | GSM22462 | GSM22467 | GSM22480 | GSM22491 | GSM22496 |          |

**5.2.1 Comparing LAS and IRCC-KM biclusters**

|                    | No ECM | ECM3 |
|--------------------|--------|------|
| No ECM3            | 524    | 61   |
| ECM3               | 56     | 50   |
| Jaccard similarity | 0.30   |      |

Table 23: Comparing gene lists: LAS (column) vs. IRCC-KM bicluster (row)

|                    | No ECM | ECM3 |
|--------------------|--------|------|
| No ECM3            | 37     | 0    |
| ECM3               | 5      | 18   |
| Jaccard similarity | 0.78   |      |

Table 24: Comparing sample lists: LAS (column) vs. IRCC-KM bicluster (row)



### 5.3 IRCC-HC bicluster

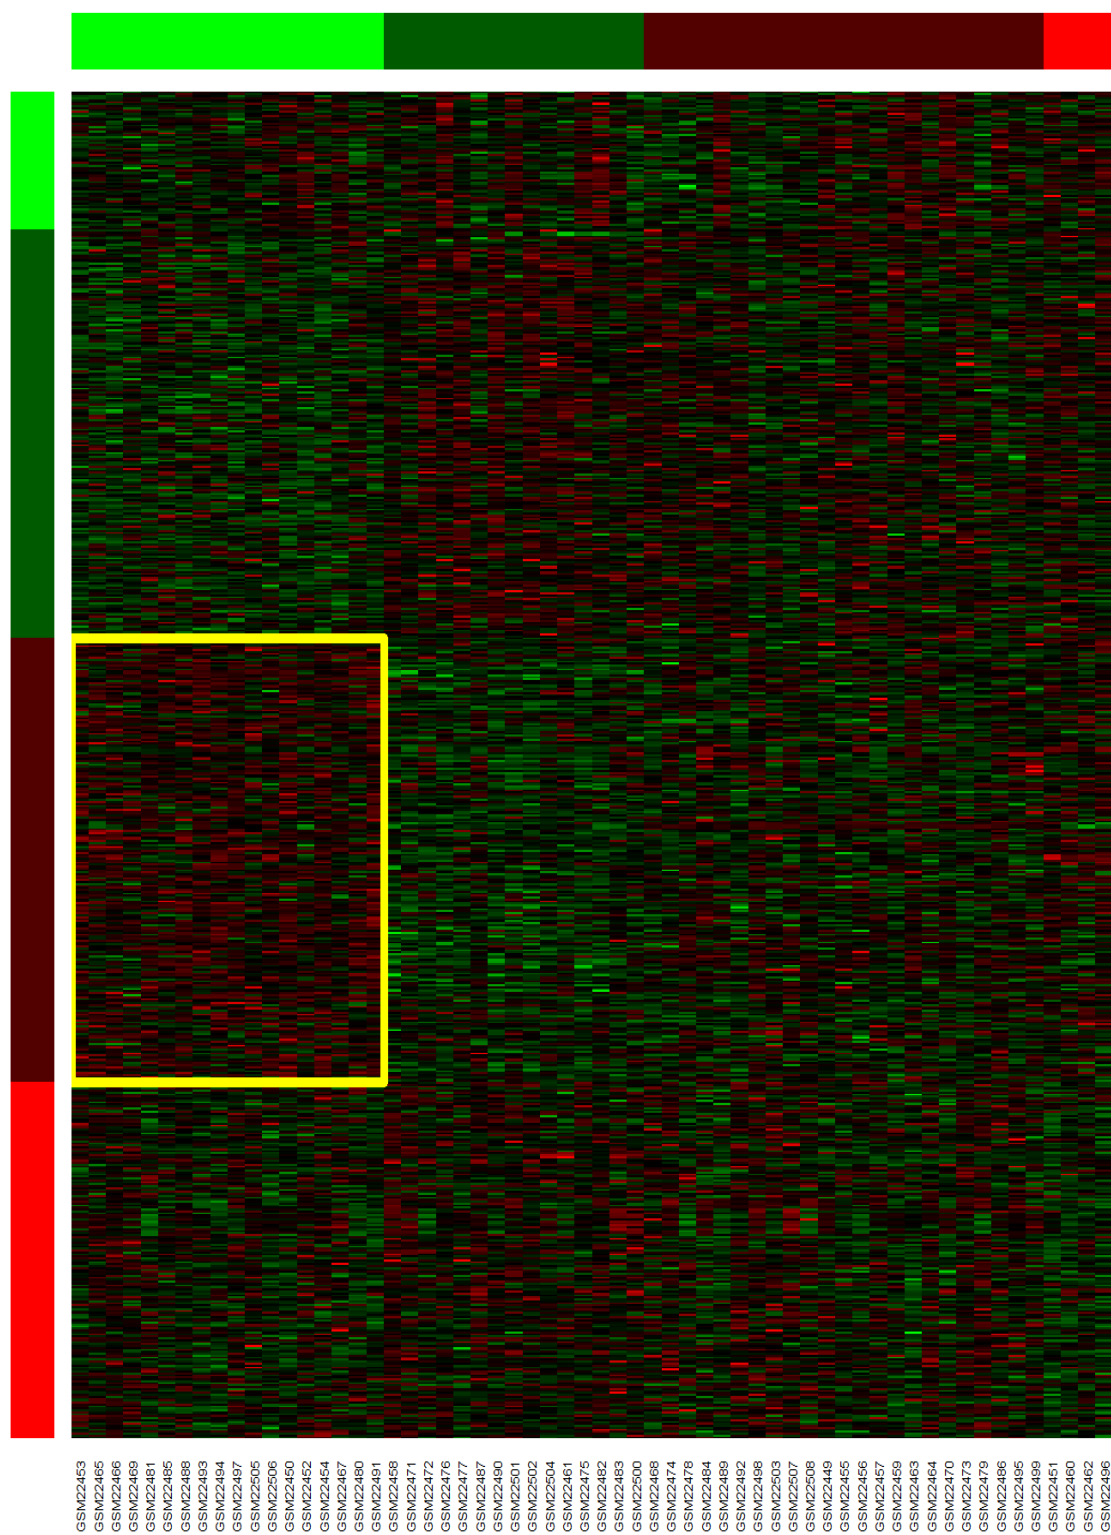

Figure 32: Heatmap of the IRCC-HC bicluster

*IRCC-HC genes*

|          |          |              |          |          |          |
|----------|----------|--------------|----------|----------|----------|
| ADAM12   | ADAM23   | ADAM30       | ADAM33   | ADAMTS1  | ADAMTS12 |
| ADAMTS2  | ADAMTS3  | ADAMTS4      | ADAMTS6  | ADAMTS8  | ADAMTS9  |
| ADAMTSL1 | ADIPOQ   | AGT          | APP      | APP      | ASAM     |
| BCAN     | BGN      | BST1         | BST2     | CD36     | CD36     |
| CD47     | CD47     | CDH11        | CDH17    | CDH18    | CDH22    |
| CDH3     | CDH5     | CDH6         | CEACAM1  | ChGn     | CHL1     |
| CHST1    | CHST3    | CHST6        | CHST7    | CHST9    | CHSY1    |
| CIB2     | CNTN1    | CNTN6        | CNTNAP3  | COL10A1  | COL11A1  |
| COL11A2  | COL12A1  | COL14A1      | COL15A1  | COL17A1  | COL18A1  |
| COL1A1   | COL1A2   | COL21A1      | COL23A1  | COL4A1   | COL4A2   |
| COL5A1   | COL5A2   | COL5A3       | COL6A1   | COL6A2   | COL6A3   |
| COL7A1   | COL8A1   | COLQ         | COMP     | CORIN    | CPA3     |
| CPE      | CSG1cA_T | CTHRC1       | CTSG     | CTSK     | CTSO     |
| DCN      | DCN      | DKFZP586H212 | EFEMP2   | ELN      | EMILIN1  |
| EMILIN1  | EMILIN2  | ESAM         | FBLN1    | FBLN2    | FBLN5    |
| FBN1     | FLRT2    | GPC3         | GPC6     | HABP4    | HAS1     |
| HAS2     | HSPG2    | HTRA1        | ITFG2    | ITGA10   | ITGA11   |
| ITGA5    | ITGA7    | ITGA8        | ITGA9    | ITGAV    | ITGAX    |
| ITGB6    | ITGBL1   | ITGBL1       | KLK1     | KLK3     | KLK5     |
| KLK6     | KLK7     | KLK7         | LAMA2    | LAMA4    | LAMB3    |
| LAMC1    | LAMC2    | LEPRE1       | MASP1    | MATN2    | MATN2    |
| MATN3    | MCAM     | MME          | MMP10    | MMP11    | MMP11    |
| MMP13    | MMP14    | MMP16        | MMP19    | MMP2     | MMP23B   |
| MMP23B   | MMP27    | MMP28        | MMP3     | MMP7     | NAALAD2  |
| NAALADL1 | NID2     | NRP1         | NRXN2    | P11      | PAPLN    |
| PCDH12   | PCDH17   | PCDH17       | PCDH18   | PCDH19   | PCDH7    |
| PCDH9    | PCDHB13  | PCDHB14      | PCDHB15  | PCDHB16  | PCDHB17  |
| PCDHB18  | PCDHB2   | PCDHB4       | PCDHB5   | PCDHB6   | PCDHB7   |
| PCDHB8   | PCDHGA12 | PCDHGA12     | PCDHGA3  | PCOLCE   | PCOLCE2  |
| PECAM1   | PGCP     | PLXNA1       | PLXNA2   | PLXNA4A  | PLXNC1   |
| ROBO1    | ROBO3    | ROBO4        | SDC2     | SELE     | SELP     |
| SEMA3C   | SERPINA2 | SERPINB1     | SERPINE1 | SERPINE2 | SERPINF1 |
| SERPING1 | SERPINH1 | SGCB         | SGCD     | SGCG     | SLIT2    |
| SLIT2    | SLIT3    | SLIT3        | SMOC2    | SNED1    | SPARC    |
| SPARCL1  | SPG21    | SPG3A        | SPOCK1   | SPON1    | SPON2    |
| SPON2    | THBS1    | THBS2        | THBS3    | THBS4    | TIMP2    |
| TIMP3    | TIMP4    | TMPRSS3      | TNC      | TNN      | TSPAN18  |
| TSPAN2   | TSPAN7   | TSPAN8       | VCAN     | VWF      | XPNPEP2  |

*IRCC-HC samples*

GSM22453 GSM22465 GSM22466 GSM22469 GSM22481 GSM22485 GSM22488 GSM22493  
GSM22494 GSM22497 GSM22505 GSM22506 GSM22450 GSM22452 GSM22454 GSM22467  
GSM22480 GSM22491

### 5.3.1 Comparing LAS and IRCC-HC biclusters

|                    | No ECM | ECM3 |
|--------------------|--------|------|
| No ECM3            | 450    | 13   |
| ECM3               | 130    | 98   |
| Jaccard similarity | 0.41   |      |

Table 25: Comparing gene lists: LAS (column) vs. IRCC-HC bicluster (row)

|                    | No ECM | ECM3 |
|--------------------|--------|------|
| No ECM3            | 40     | 2    |
| ECM3               | 2      | 16   |
| Jaccard similarity | 0.80   |      |

Table 26: Comparing sample lists: LAS (column) vs. IRCC-HC bicluster (row)

## 5.4 CCSS bicluster

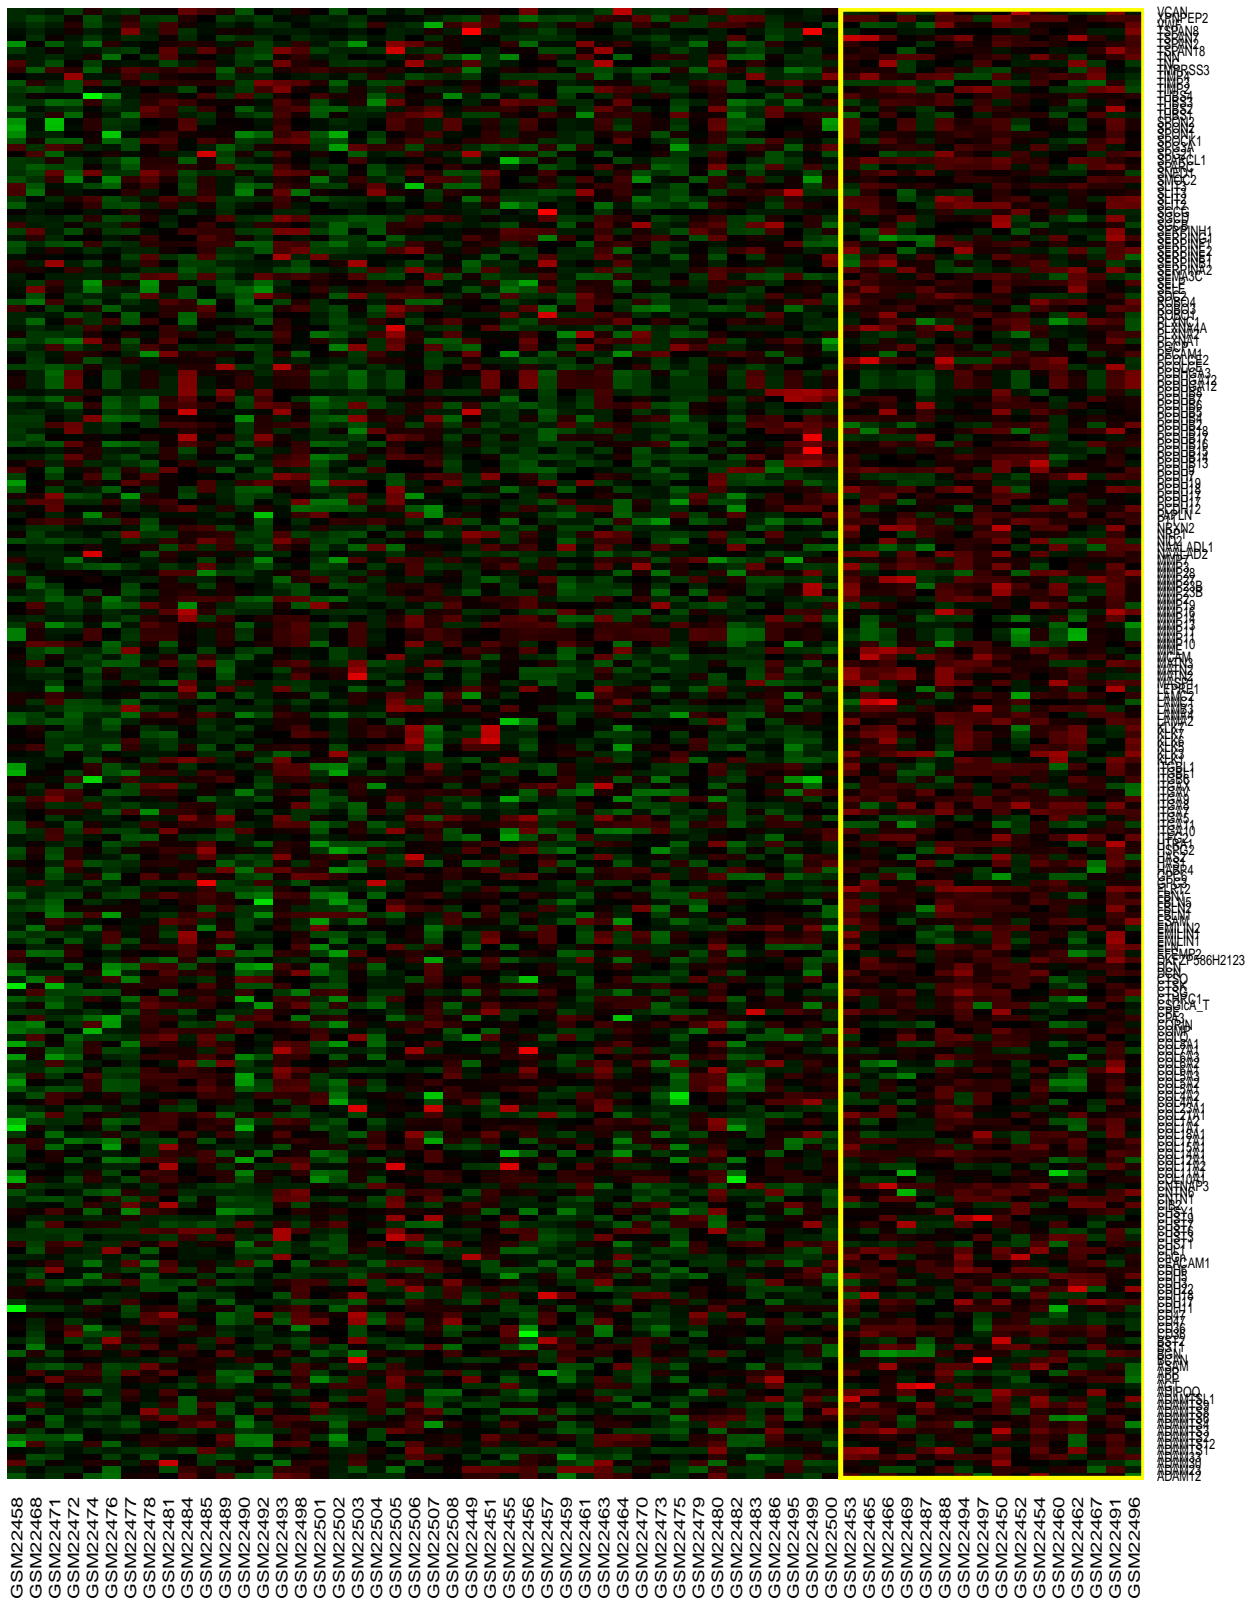

Figure 33: Heatmap of the CCSS bicluster

### 5.4.1 Comparing LAS and CCSS biclusters

|                    | No ECM | ECM3 |
|--------------------|--------|------|
| No ECM3            | 38     | 6    |
| ECM3               | 4      | 12   |
| Jaccard similarity | 0.55   |      |

Table 27: Comparing sample lists: LAS (column) vs. CCSS (row) biclusters

### 5.4.2 Prediction strength for CCSS

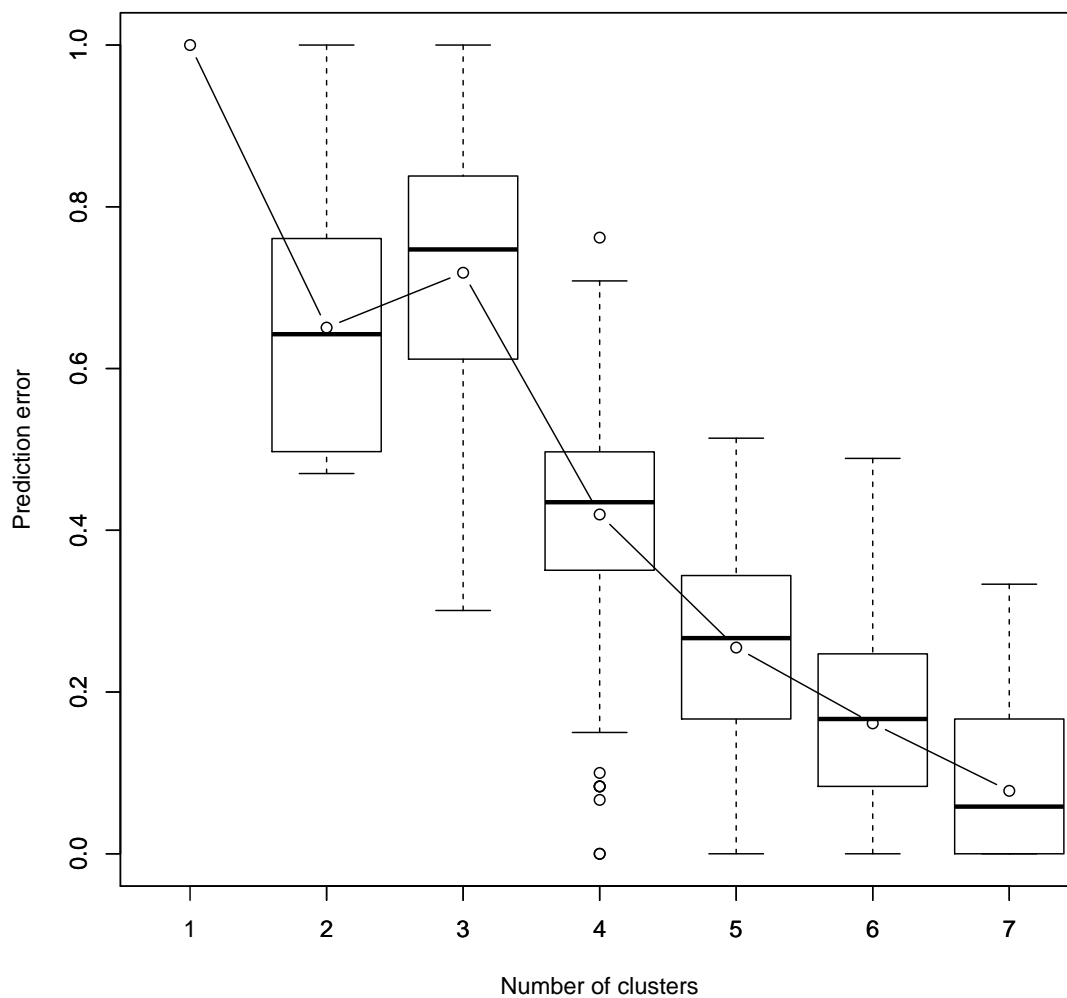

### 5.4.3 Consensus clustering

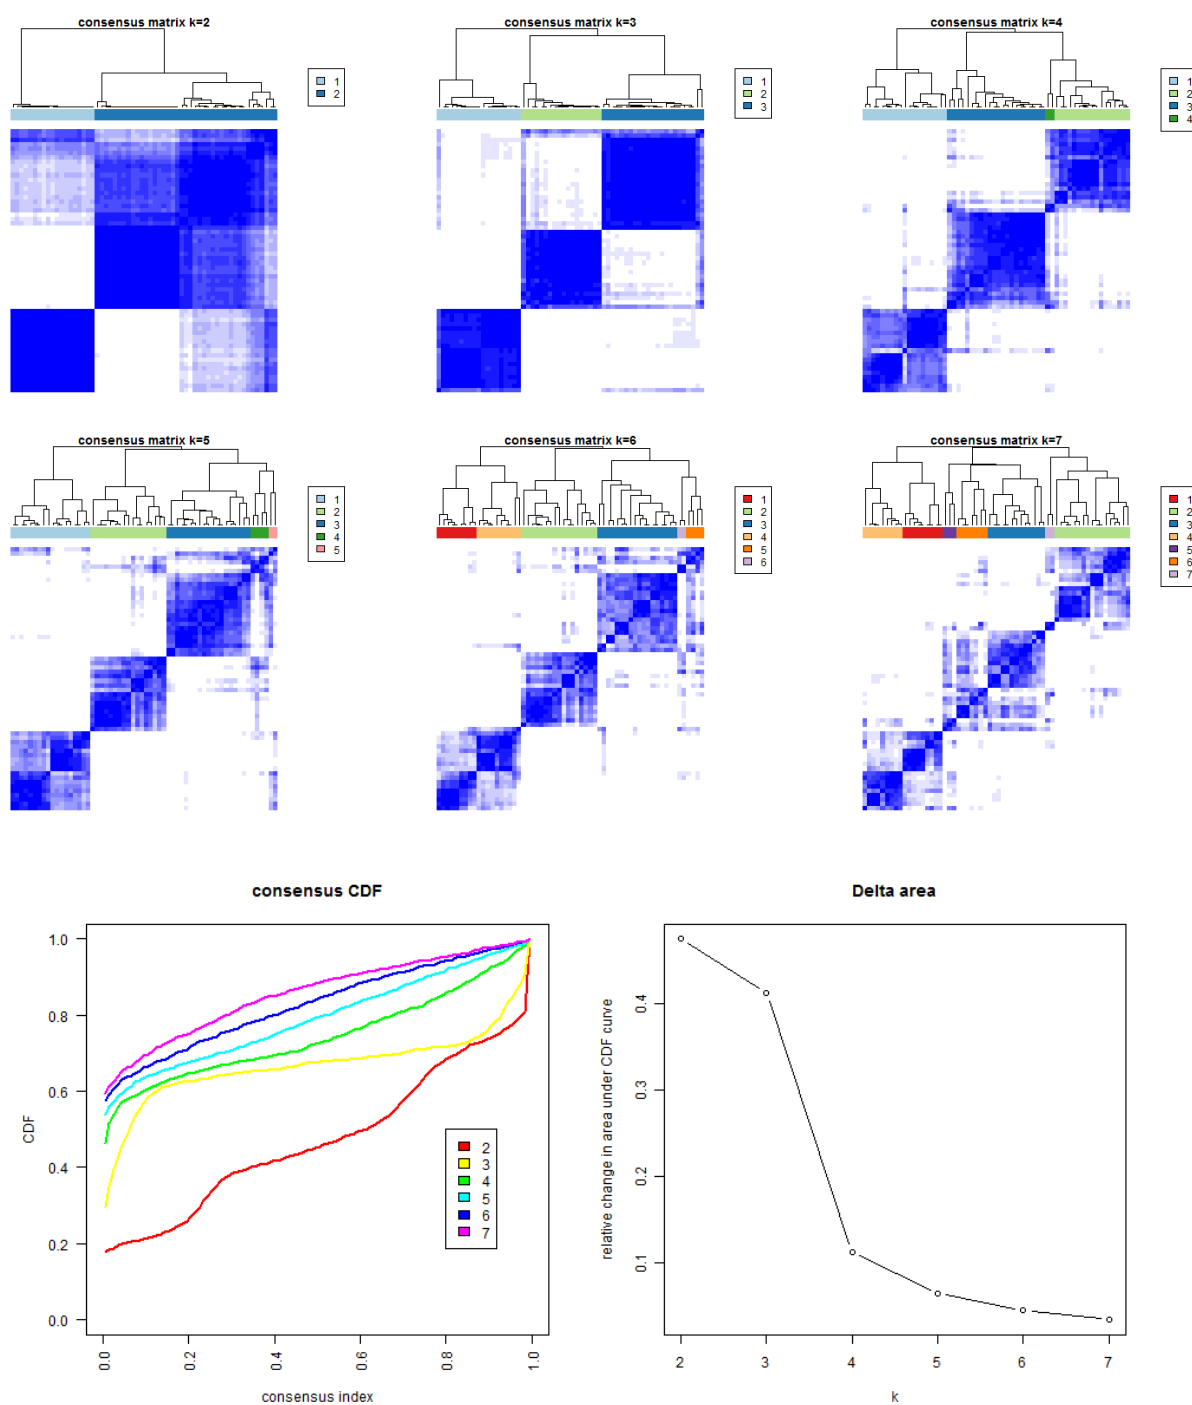

Figure 34: Statistical significance of CCSS clustering (Consensus clustering )

## 5.4.4 Statistical significance

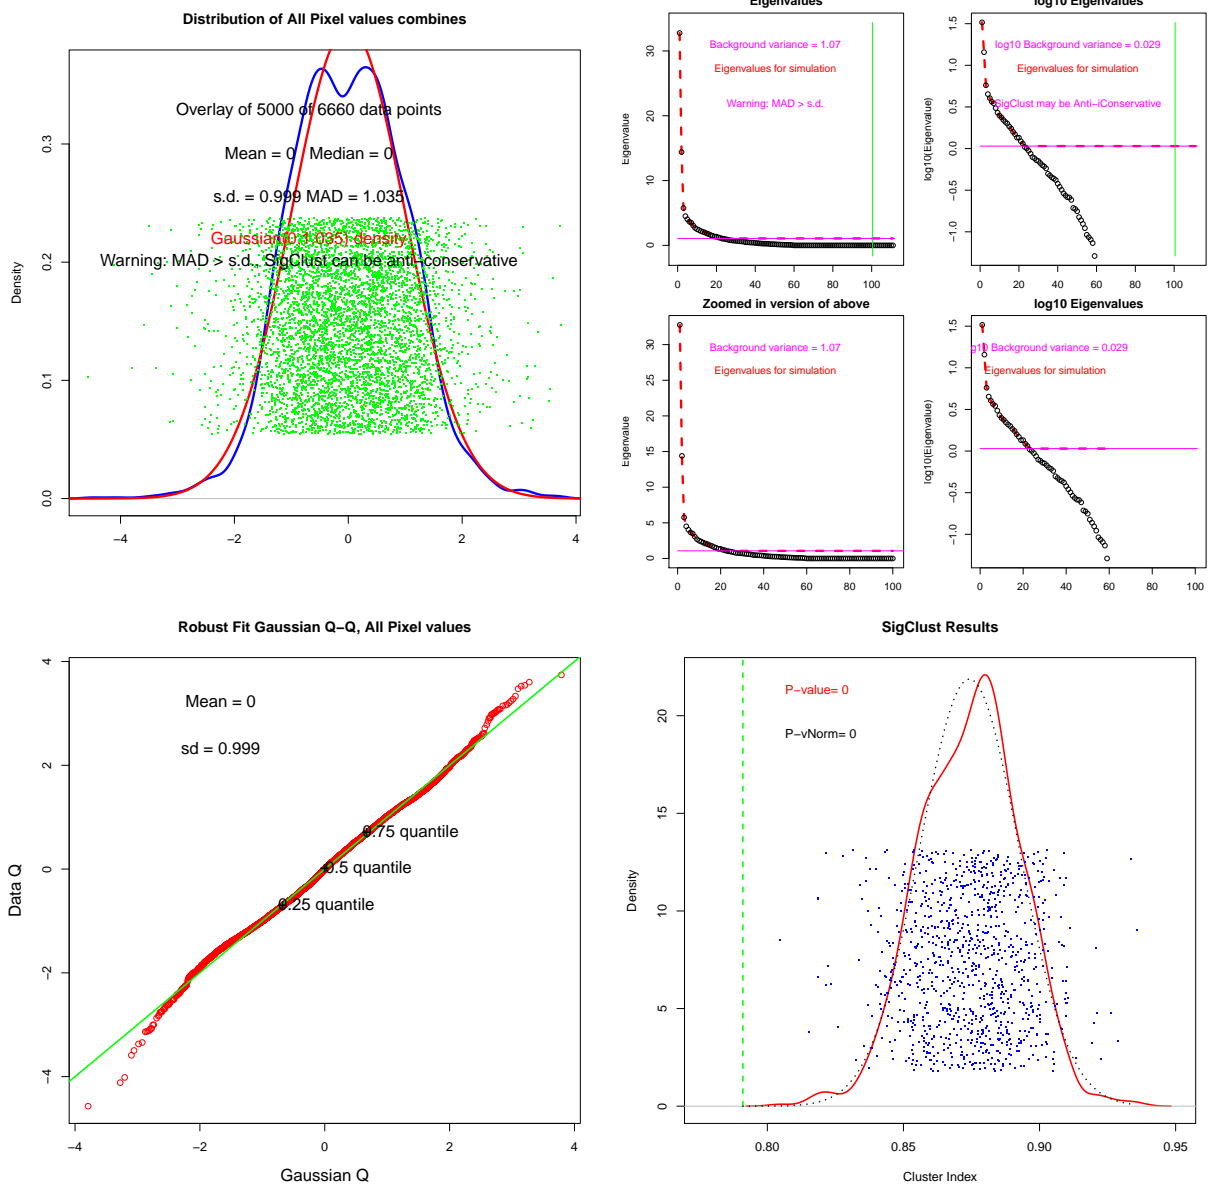

| P-value | P-vNorm |
|---------|---------|
| 0.0E+00 | 2.5E-06 |

Table 28: SigClust p-values

## 5.4.5 Cluster-wise assessment of cluster stability

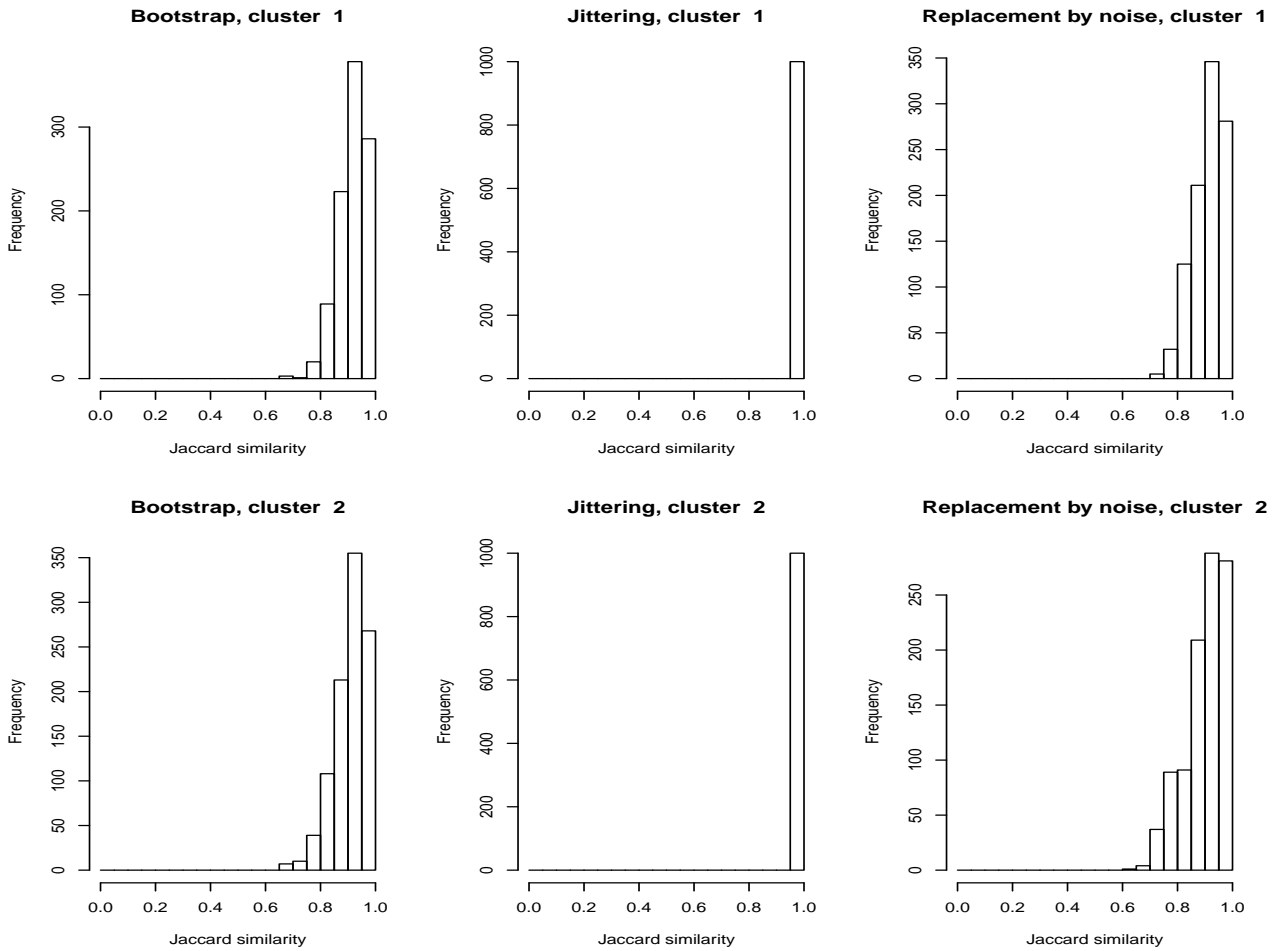

\* Cluster stability assessment \*

Cluster method: kmeans

Full clustering results are given as parameter result of the clusterboot object, which also provides further statistics of the resampling results.

Number of resampling runs: 1000

Number of clusters found in data: 2

Clusterwise Jaccard bootstrap mean:

[1] 0.9199726 0.9118352

dissolved:

[1] 0 0

recovered:

[1] 996 983

Clusterwise Jaccard jittering mean:

[1] 0.9981930 0.9981273

dissolved:

[1] 0 0

recovered:



```
[1] 1000 1000
Clusterwise Jaccard replacement by noise mean:
[1] 0.9133471 0.8996397
dissolved:
[1] 0 0
recovered:
[1] 995 958
```

*Removing one sample*

```
Min. 1st Qu. Median Mean 3rd Qu. Max.
0.9048 1.0000 1.0000 0.9921 1.0000 1.0000
```

*Removing one gene*

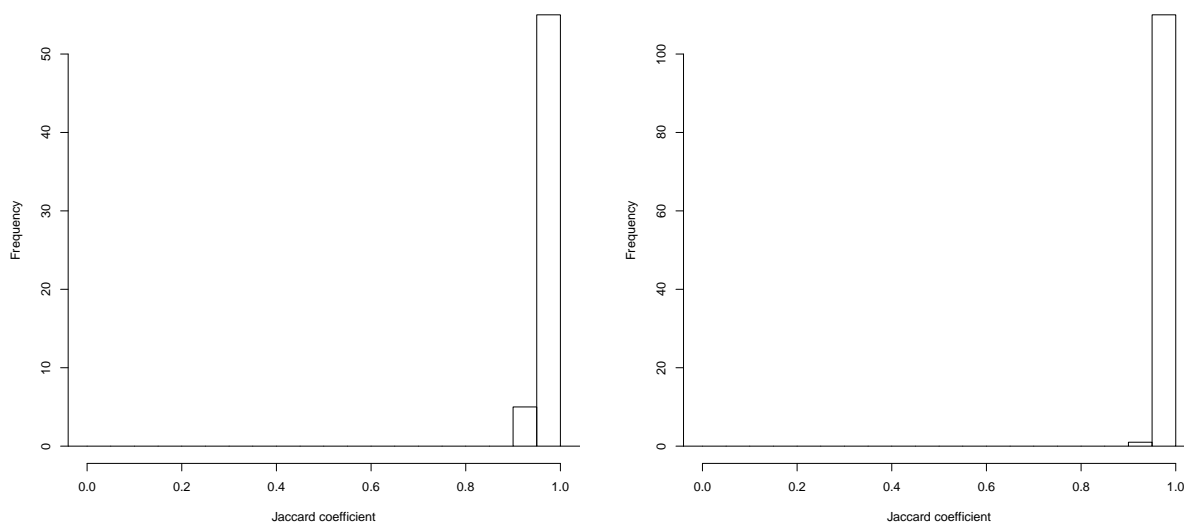

Figure 35: Removing one sample (left) and one gene (right) at a time: distributions of Jaccard coefficients

```
Min. 1st Qu. Median Mean 3rd Qu. Max.
0.9091 1.0000 1.0000 0.9992 1.0000 1.0000
```

| APN             | AD            | ADM            | FOM            |
|-----------------|---------------|----------------|----------------|
| Min. :0.06349   | Min. :13.00   | Min. :0.8571   | Min. :0.6482   |
| 1st Qu.:0.06349 | 1st Qu.:13.00 | 1st Qu.:0.8571 | 1st Qu.:0.8715 |
| Median :0.06349 | Median :13.00 | Median :0.8571 | Median :0.9158 |
| Mean :0.06401   | Mean :13.00   | Mean :0.8625   | Mean :0.9005   |
| 3rd Qu.:0.06349 | 3rd Qu.:13.00 | 3rd Qu.:0.8571 | 3rd Qu.:0.9404 |
| Max. :0.12063   | Max. :13.13   | Max. :1.4569   | Max. :0.9916   |

*Removing sets of k genes*

```
Min. 1st Qu. Median Mean 3rd Qu. Max.
0.4762 0.7692 0.8333 0.8170 0.9091 1.0000
```

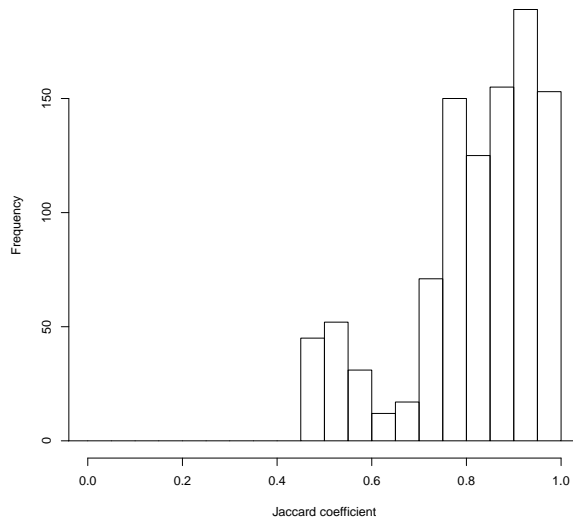

Figure 36: Removing two thirds of the genes: distribution of Jaccard coefficients

#### 5.4.6 Validation measures

Clustering Methods:

kmeans

Cluster sizes:

2 3 4 5 6

Validation Measures:

|        |              | 2       | 3       | 4       | 5       | 6       |
|--------|--------------|---------|---------|---------|---------|---------|
| kmeans | APN          | 0.0638  | 0.0006  | 0.1486  | 0.1582  | 0.1054  |
|        | AD           | 13.0425 | 11.9173 | 11.8692 | 11.5951 | 11.1700 |
|        | ADM          | 0.9246  | 0.0079  | 1.6336  | 1.6651  | 1.2240  |
|        | FOM          | 0.9065  | 0.8428  | 0.8386  | 0.8315  | 0.8225  |
|        | Connectivity | 9.0968  | 17.1563 | 36.6698 | 39.4595 | 55.3802 |
|        | Dunn         | 0.5243  | 0.6137  | 0.5997  | 0.5521  | 0.5964  |
|        | Silhouette   | 0.1796  | 0.1473  | 0.1246  | 0.1068  | 0.0851  |

Optimal Scores:

|              | Score   | Method | Clusters |
|--------------|---------|--------|----------|
| APN          | 0.0006  | kmeans | 3        |
| AD           | 11.1700 | kmeans | 6        |
| ADM          | 0.0079  | kmeans | 3        |
| FOM          | 0.8225  | kmeans | 6        |
| Connectivity | 9.0968  | kmeans | 2        |
| Dunn         | 0.6137  | kmeans | 3        |
| Silhouette   | 0.1796  | kmeans | 2        |

## 6 Desmedt et al (2007) dataset

### 6.1 LAS bicluster

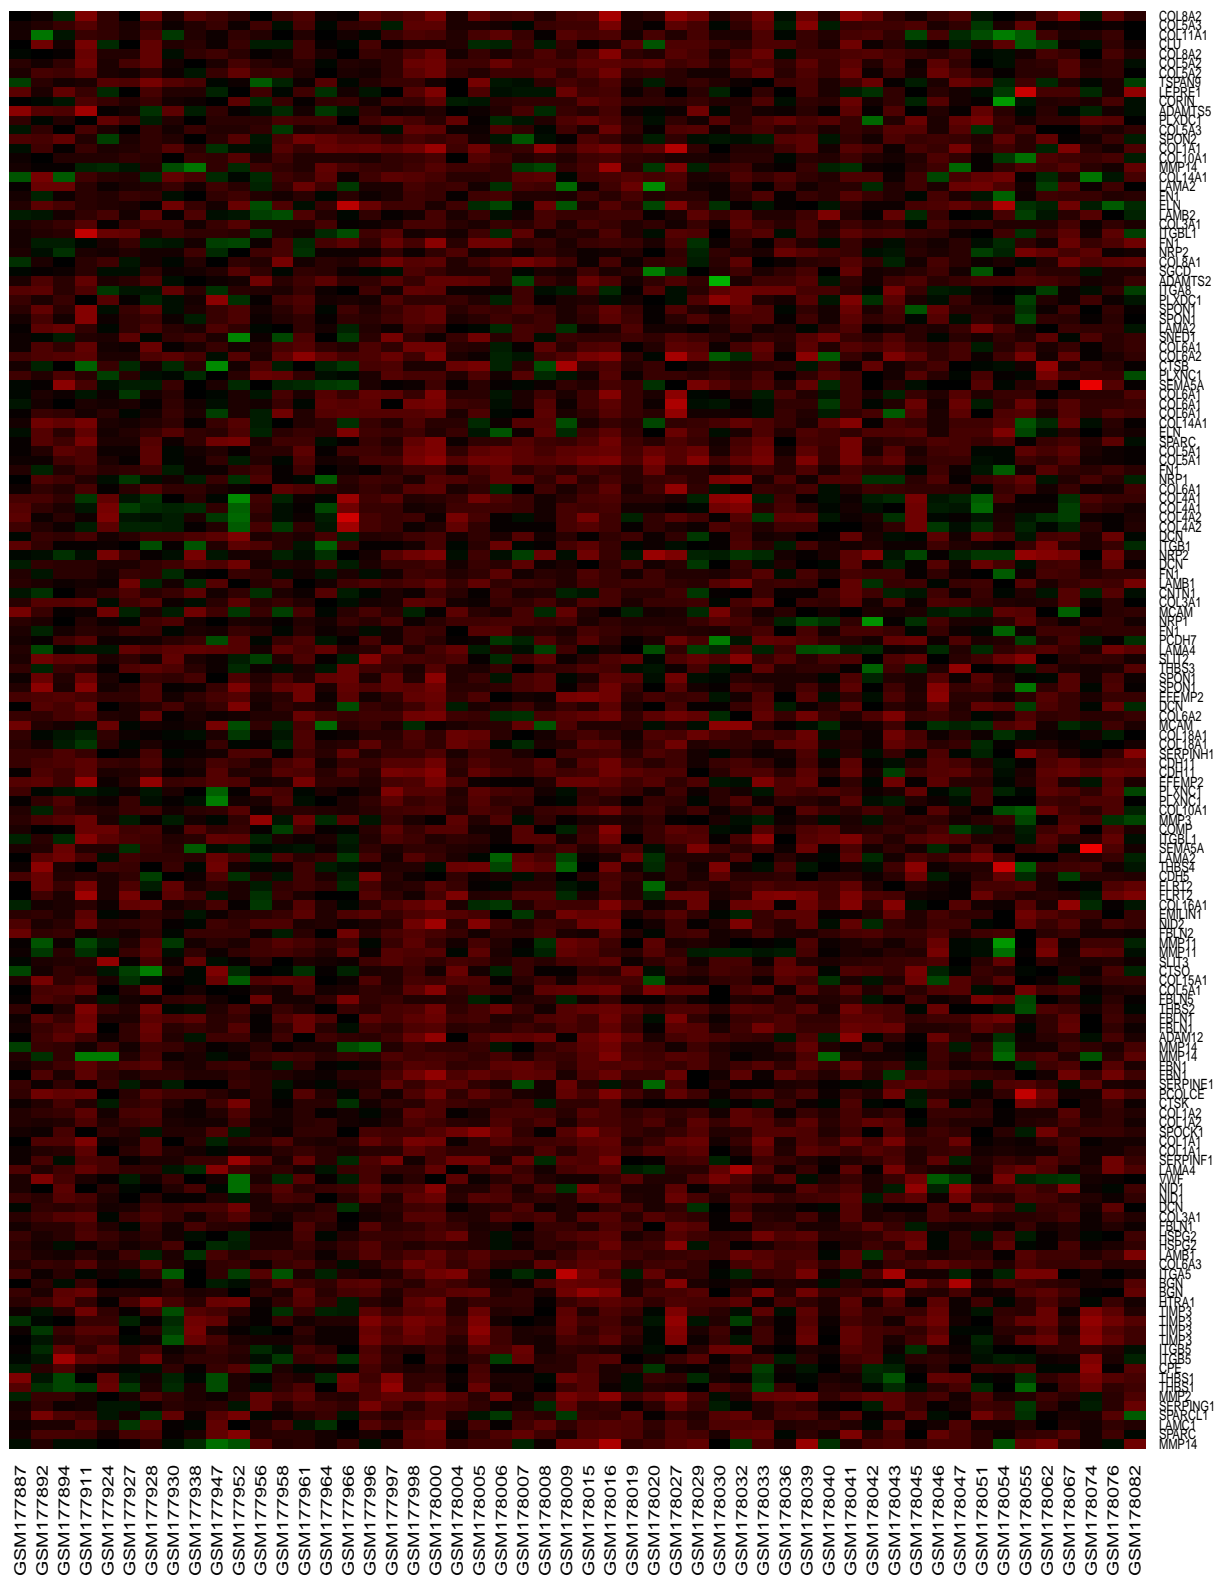

Figure 37: Heatmap of the LAS bicluster

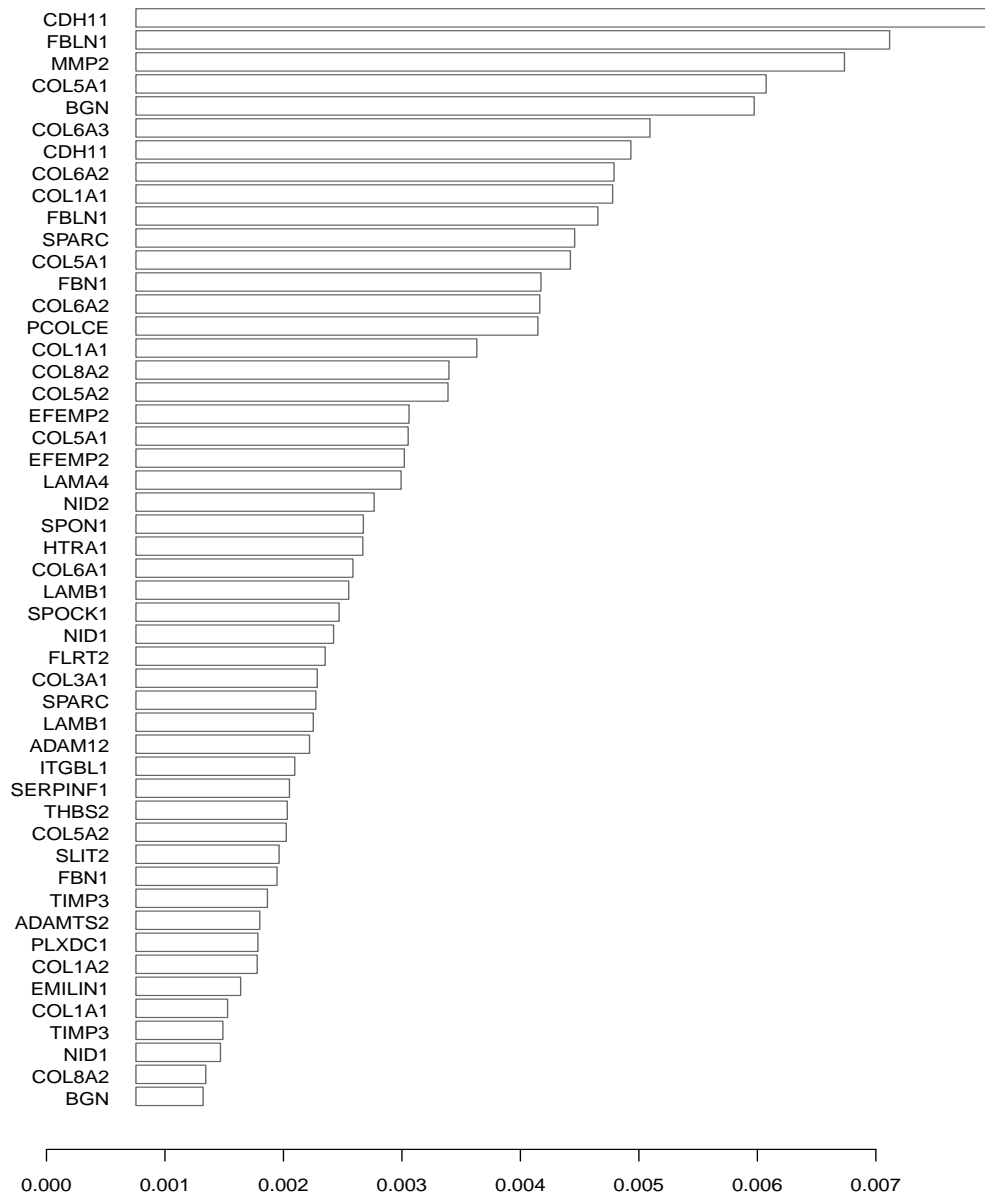

Figure 38: Most informative genes for the LAS bicluster

Number of informative genes of the LAS bicluster that also belong to the ECM3 consensus list: 32 of 34 (94%)

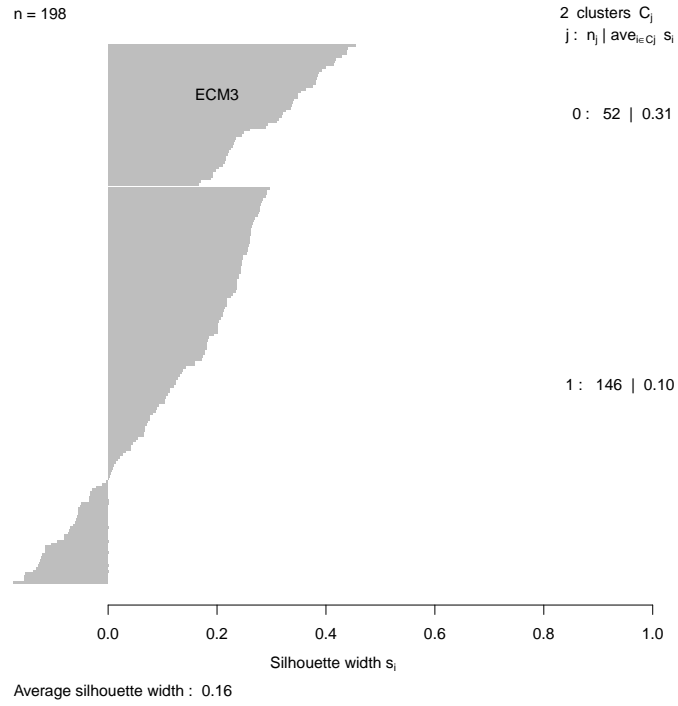

Figure 39: Silhouette plot for the LAS bicluster

| Connectivity | Dunn Index |
|--------------|------------|
| 53.52        | 0.35       |

Table 29: Connectivity validation measure and Dunn Index of LAS partitioning

## 6.2 IRCC-KM bicluster

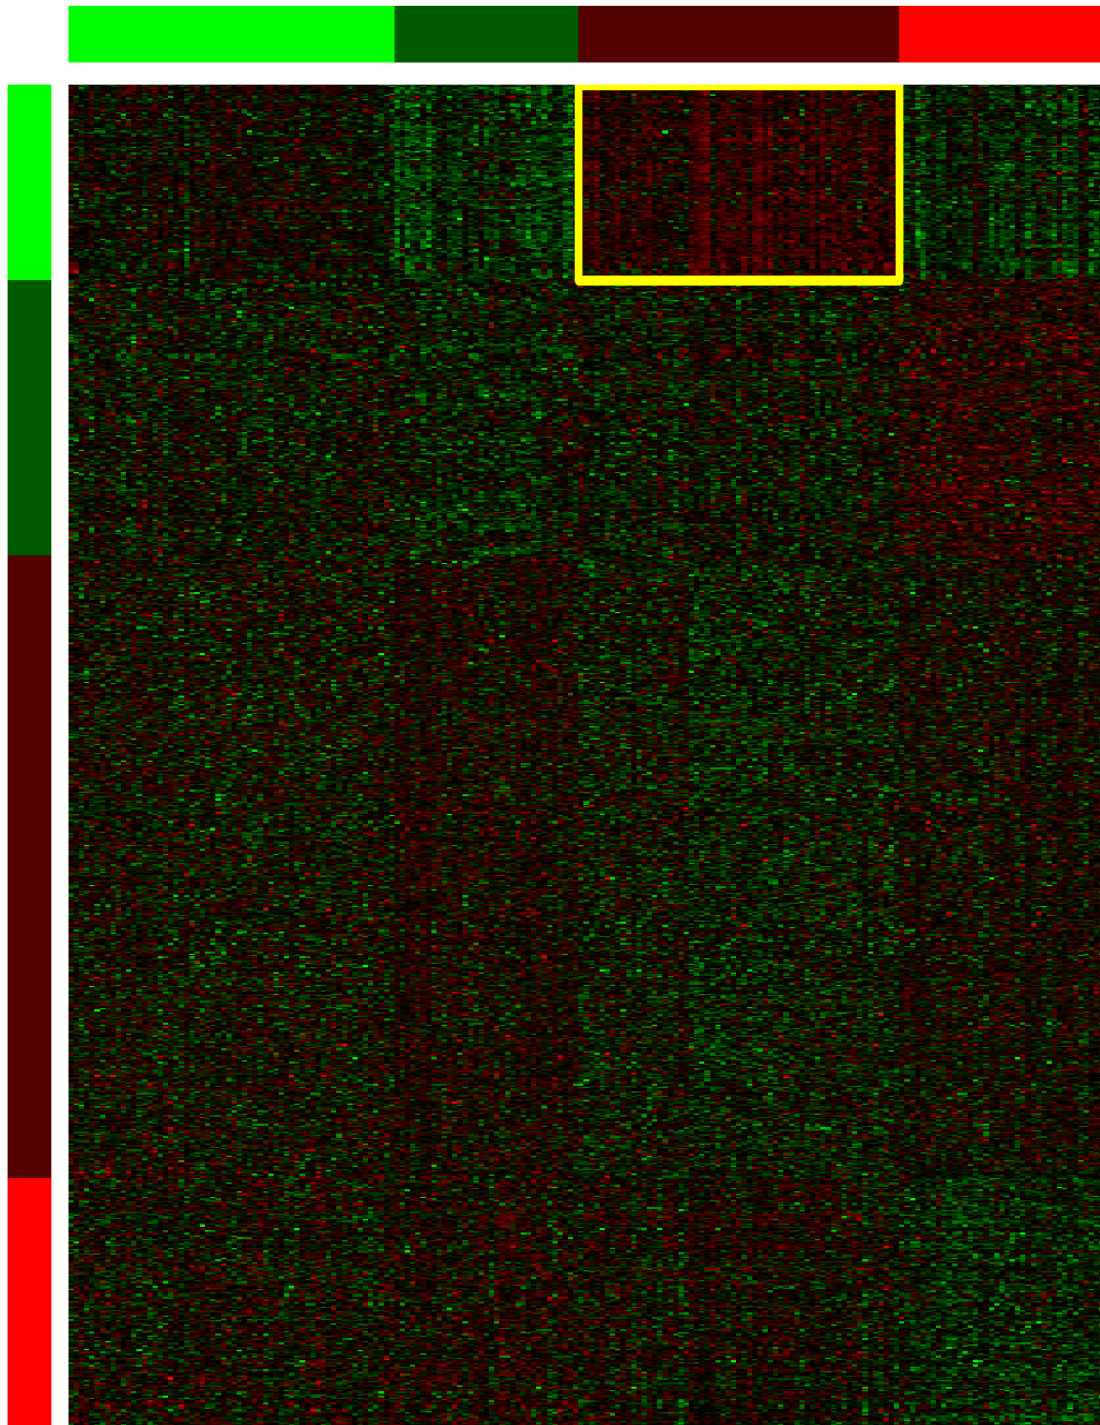

Figure 40: Heatmap of the IRCC-KM bicluster

*IRCC-KM genes*

|          |         |         |         |         |         |          |
|----------|---------|---------|---------|---------|---------|----------|
| MMP14    | SPARC   | LAMC1   | LAMC1   | MMP2    | THBS1   | THBS1    |
| THBS1    | TIMP3   | TIMP3   | TIMP3   | TIMP3   | HTRA1   | BGN      |
| BGN      | ITGA5   | COL6A3  | LAMB1   | TNC     | HSPG2   | HSPG2    |
| FBLN1    | COL3A1  | DCN     | NID1    | NID1    | LAMA4   | SERPINF1 |
| COL1A1   | COL1A1  | SPOCK1  | COL1A2  | COL1A2  | CTSK    | PCOLCE   |
| SERPINE1 | GPC1    | FBN1    | FBN1    | MMP14   | MMP14   | ADAM12   |
| FBLN1    | FBLN1   | THBS2   | COL5A1  | COL15A1 | SLIT3   | MMP11    |
| MMP11    | FBLN2   | NID2    | COL7A1  | EMILIN1 | COL11A1 | COL16A1  |
| FLRT2    | FLRT2   | CDH13   | SEMA5A  | ITGBL1  | PCDH7   | PCDH7    |
| COMP     | MMP3    | COL10A1 | MMP13   | EFEMP2  | CDH11   | CDH11    |
| SERPINH1 | COL18A1 | COL18A1 | COL6A2  | DCN     | EFEMP2  | SPON1    |
| SPON1    | THBS3   | SLIT2   | PCDH7   | FN1     | NRP1    | COL3A1   |
| CNTN1    | LAMB1   | FN1     | DCN     | NRP2    | ITGB1   | DCN      |
| COL6A1   | NRP1    | FN1     | COL5A1  | COL5A1  | SPARC   | ELN      |
| COL6A1   | COL6A1  | COL6A1  | PLXNC1  | COL6A2  | COL6A1  | SNED1    |
| SPON1    | SPON1   | PLXDC1  | ITGA8   | ADAMTS2 | SGCD    | COL8A1   |
| NRP2     | FN1     | FN1     | ITGBL1  | COL3A1  | FN1     | COL10A1  |
| COL1A1   | SPON2   | COL5A3  | PLXDC1  | ADAMTS5 | CORIN   | LEPRE1   |
| COL5A2   | COL5A2  | COL8A2  | COL11A1 | COL5A3  | COL8A2  |          |

*IRCC-KM samples*

GSM177887 GSM177892 GSM177894 GSM177911 GSM177921 GSM177924 GSM177927  
GSM177928 GSM177930 GSM177938 GSM177944 GSM177947 GSM177958 GSM177961  
GSM177964 GSM177966 GSM177976 GSM177989 GSM177992 GSM177993 GSM177994  
GSM177996 GSM177997 GSM177998 GSM178000 GSM178002 GSM178004 GSM178005  
GSM178006 GSM178007 GSM178008 GSM178009 GSM178014 GSM178015 GSM178016  
GSM178019 GSM178027 GSM178028 GSM178029 GSM178030 GSM178032 GSM178033  
GSM178035 GSM178036 GSM178039 GSM178040 GSM178041 GSM178042 GSM178043  
GSM178045 GSM178046 GSM178047 GSM178051 GSM178054 GSM178055 GSM178062  
GSM178067 GSM178073 GSM178074 GSM178076 GSM178082

### 6.2.1 Comparing LAS and IRCC-KM biclusters

|                    | No ECM | ECM3 |
|--------------------|--------|------|
| No ECM3            | 744    | 31   |
| ECM3               | 11     | 121  |
| Jaccard similarity | 0.74   |      |

Table 30: Comparing gene lists: LAS (column) vs. IRCC-KM bicluster (row)

|                    | No ECM | ECM3 |
|--------------------|--------|------|
| No ECM3            | 134    | 3    |
| ECM3               | 12     | 49   |
| Jaccard similarity | 0.77   |      |

Table 31: Comparing sample lists: LAS (column) vs. IRCC-KM bicluster (row)



### 6.3 IRCC-HC bicluster

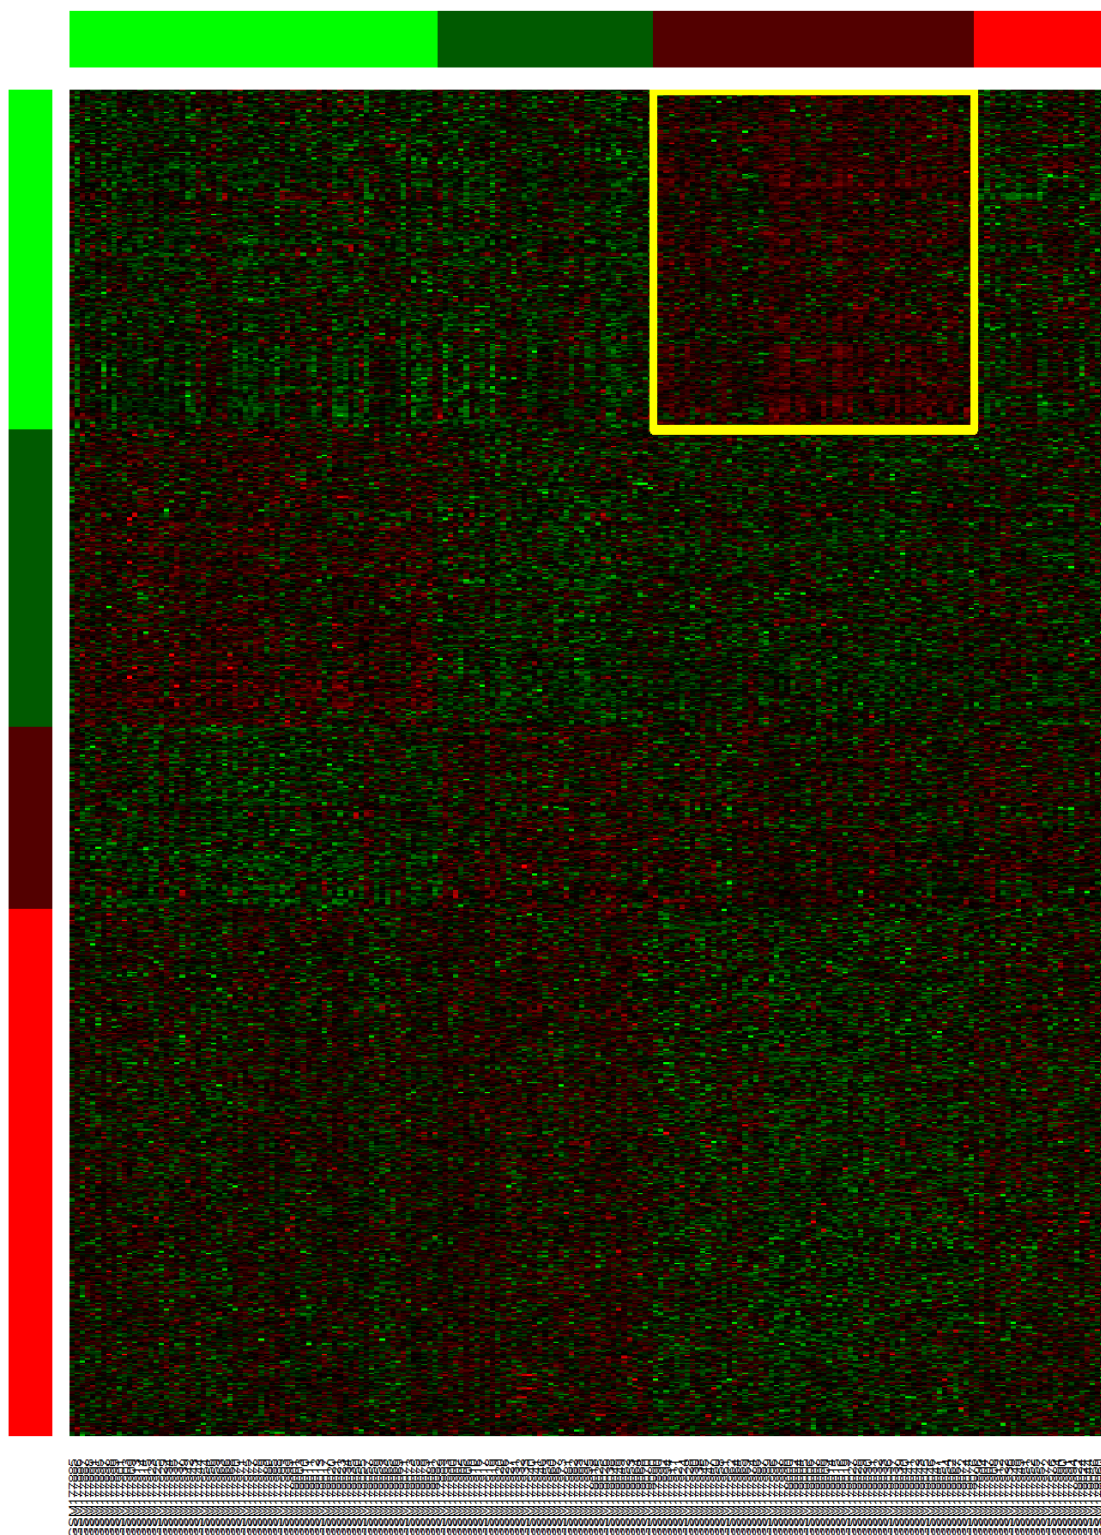

Figure 41: Heatmap of the IRCC-HC bicluster

*IRCC-HC genes*

|              |          |          |          |          |          |
|--------------|----------|----------|----------|----------|----------|
| ADAM12       | ADAM8    | ADAMTS1  | ADAMTS2  | ADAMTS2  | ADAMTS5  |
| ADIPOQ       | BGN      | BGN      | CD36     | CD36     | CDH11    |
| CDH11        | CDH13    | CDH2     | CDH2     | CDH5     | CHL1     |
| CHPF         | CLU      | CLU      | CLU      | CNTN1    | CNTNAP1  |
| COL10A1      | COL10A1  | COL11A1  | COL11A1  | COL13A1  | COL13A1  |
| COL13A1      | COL14A1  | COL14A1  | COL14A1  | COL15A1  | COL16A1  |
| COL17A1      | COL18A1  | COL18A1  | COL1A1   | COL1A1   | COL1A1   |
| COL1A2       | COL1A2   | COL3A1   | COL3A1   | COL3A1   | COL4A1   |
| COL4A1       | COL4A2   | COL4A2   | COL5A1   | COL5A1   | COL5A1   |
| COL5A2       | COL5A2   | COL5A3   | COL5A3   | COL6A1   | COL6A1   |
| COL6A1       | COL6A1   | COL6A1   | COL6A2   | COL6A2   | COL6A3   |
| COL7A1       | COL7A1   | COL8A1   | COL8A2   | COL8A2   | COMP     |
| CORIN        | CPA3     | CSG1cA_T | CSG1cA_T | CSPG4    | CSPG4    |
| CTSG         | CTSK     | DCN      | DCN      | DCN      | DCN      |
| DKFZP586H212 | DPP4     | DPP4     | DPP4     | EFEMP1   | EFEMP1   |
| EFEMP2       | EFEMP2   | ELN      | ELN      | EMILIN1  | FBLN1    |
| FBLN1        | FBLN1    | FBLN2    | FBLN5    | FBN1     | FBN1     |
| FLRT2        | FLRT2    | FN1      | FN1      | FN1      | FN1      |
| FN1          | FN1      | GPC1     | GPC1     | HSPG2    | HSPG2    |
| HTRA1        | HYAL1    | ITGA2    | ITGA5    | ITGA7    | ITGA7    |
| ITGB3        | ITGB3    | ITGB4    | ITGB4    | ITGB4    | ITGBL1   |
| ITGBL1       | LAMA2    | LAMA2    | LAMA2    | LAMA4    | LAMA4    |
| LAMA4        | LAMA5    | LAMB1    | LAMB1    | LAMC1    | LAMC1    |
| LEPRE1       | MATN2    | MCAM     | MCAM     | MCAM     | MCAM     |
| MME          | MME      | MMP11    | MMP11    | MMP13    | MMP14    |
| MMP14        | MMP14    | MMP14    | MMP15    | MMP17    | MMP2     |
| MMP3         | NID1     | NID1     | NID2     | NRP1     | NRP1     |
| NRP2         | NRP2     | NRXN2    | PCDH12   | PCDH17   | PCDH7    |
| PCDH7        | PCDH7    | PCOLCE   | PCOLCE2  | PLXDC1   | PLXDC1   |
| PLXNA1       | PLXNA2   | PLXNA3   | PLXNB2   | PLXNB3   | PLXND1   |
| PLXND1       | PRSS22   | SELE     | SELP     | SEMA3G   | SEMA5A   |
| SEMA5A       | SERPINE1 | SERPINE1 | SERPINE2 | SERPINF1 | SERPING1 |
| SERPINH1     | SGCD     | SGCD     | SLIT2    | SLIT3    | SNED1    |
| SNED1        | SPARC    | SPARC    | SPARCL1  | SPOCK1   | SPON1    |
| SPON1        | SPON1    | SPON1    | SPON2    | THBS1    | THBS1    |
| THBS1        | THBS1    | THBS2    | THBS3    | THBS4    | TIMP1    |
| TIMP3        | TIMP3    | TIMP3    | TIMP3    | TIMP4    | TNN      |
| TNXB         | TNXB     | TNXB     | TSPAN7   | TSPAN9   | TSPAN9   |
| VWF          |          |          |          |          |          |

*IRCC-HC samples*

|           |           |           |           |           |           |           |
|-----------|-----------|-----------|-----------|-----------|-----------|-----------|
| GSM177890 | GSM177892 | GSM177894 | GSM177911 | GSM177921 | GSM177924 | GSM177928 |
| GSM177930 | GSM177938 | GSM177945 | GSM177947 | GSM177950 | GSM177958 | GSM177961 |
| GSM177962 | GSM177964 | GSM177965 | GSM177969 | GSM177974 | GSM177986 | GSM177987 |
| GSM177989 | GSM177996 | GSM177997 | GSM177998 | GSM178000 | GSM178002 | GSM178004 |
| GSM178005 | GSM178006 | GSM178007 | GSM178008 | GSM178009 | GSM178014 | GSM178015 |

GSM178016 GSM178019 GSM178027 GSM178028 GSM178029 GSM178030 GSM178031  
 GSM178032 GSM178033 GSM178036 GSM178037 GSM178039 GSM178040 GSM178041  
 GSM178042 GSM178043 GSM178045 GSM178046 GSM178047 GSM178051 GSM178054  
 GSM178062 GSM178067 GSM178072 GSM178074 GSM178076

### 6.3.1 Comparing LAS and IRCC-HC biclusters

|                    | No ECM | ECM3 |
|--------------------|--------|------|
| No ECM3            | 667    | 11   |
| ECM3               | 88     | 141  |
| Jaccard similarity | 0.59   |      |

Table 32: Comparing gene lists: LAS (column) vs. IRCC-HC bicluster (row)

|                    | No ECM | ECM3 |
|--------------------|--------|------|
| No ECM3            | 129    | 8    |
| ECM3               | 17     | 44   |
| Jaccard similarity | 0.64   |      |

Table 33: Comparing sample lists: LAS (column) vs. IRCC-HC bicluster (row)



### 6.4.1 Comparing LAS and CCSS biclusters

|                    | No ECM | ECM3 |
|--------------------|--------|------|
| No ECM3            | 137    | 0    |
| ECM3               | 9      | 52   |
| Jaccard similarity | 0.85   |      |

Table 34: Comparing sample lists: LAS (column) vs. CCSS (row) biclusters

### 6.4.2 Prediction strength for CCSS

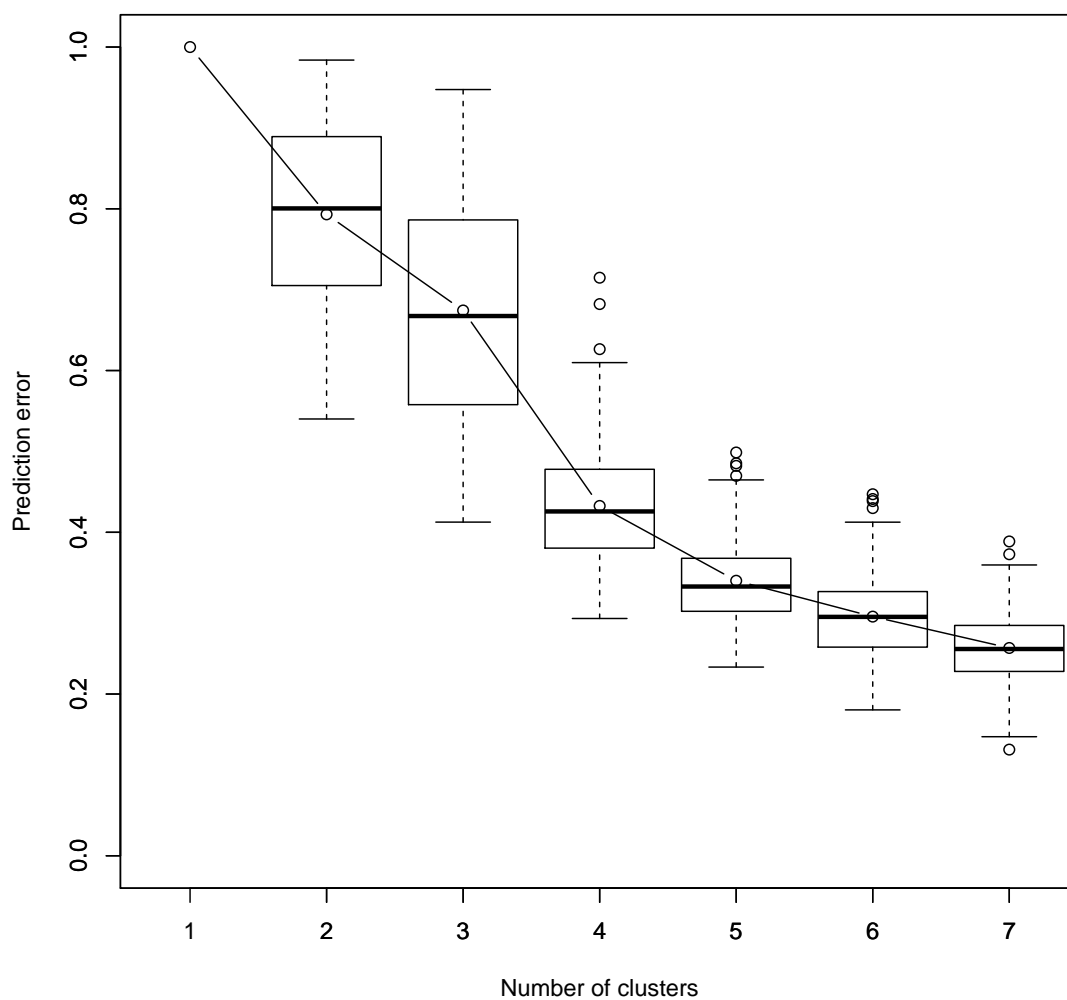

### 6.4.3 Consensus clustering

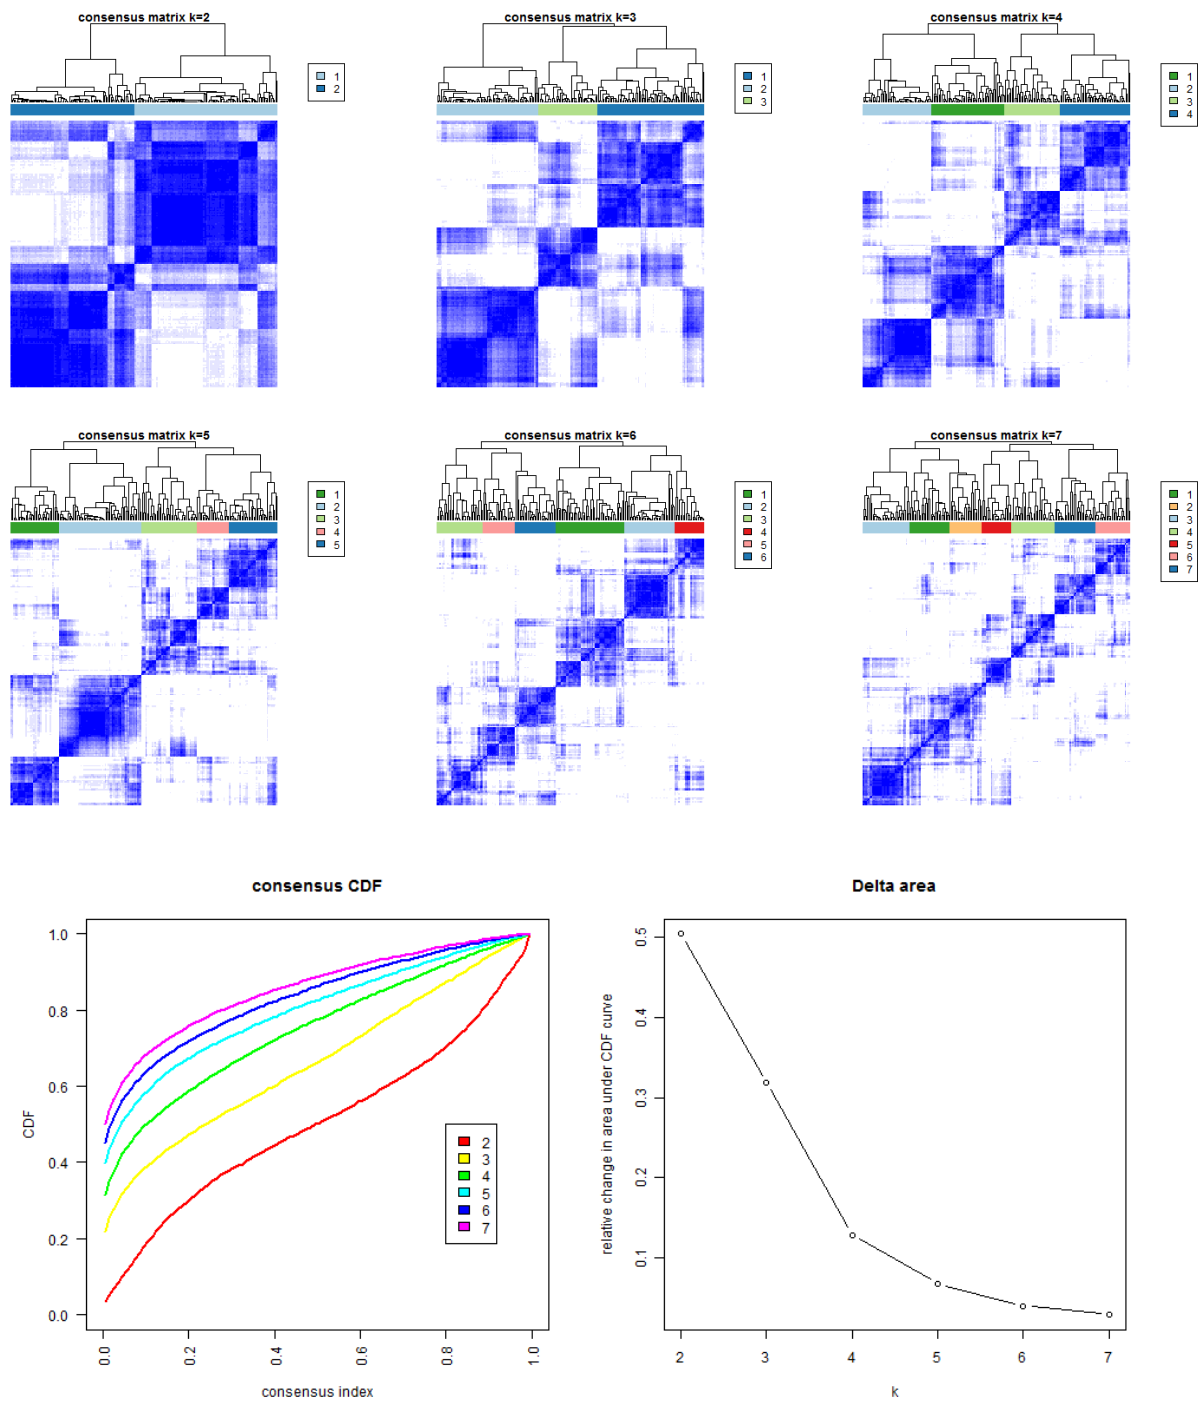

Figure 43: Statistical significance of CCSS clustering (Consensus clustering )

## 6.4.4 Statistical significance

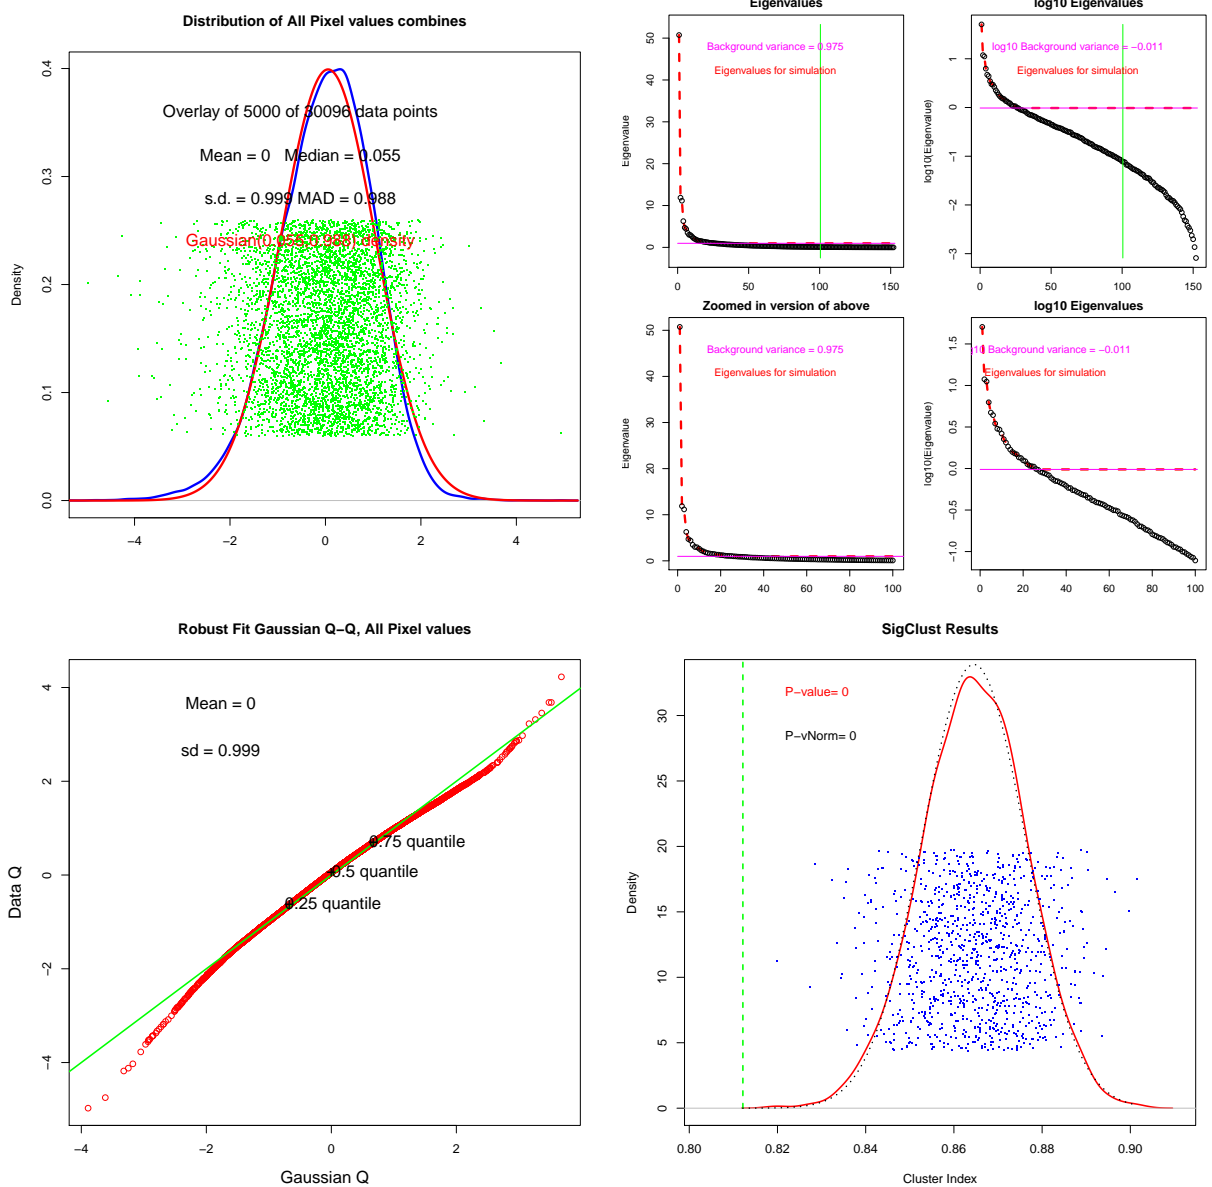

| P-value | P-vNorm |
|---------|---------|
| 0.0E+00 | 4.3E-06 |

Table 35: SigClust p-values

## 6.4.5 Cluster-wise assessment of cluster stability

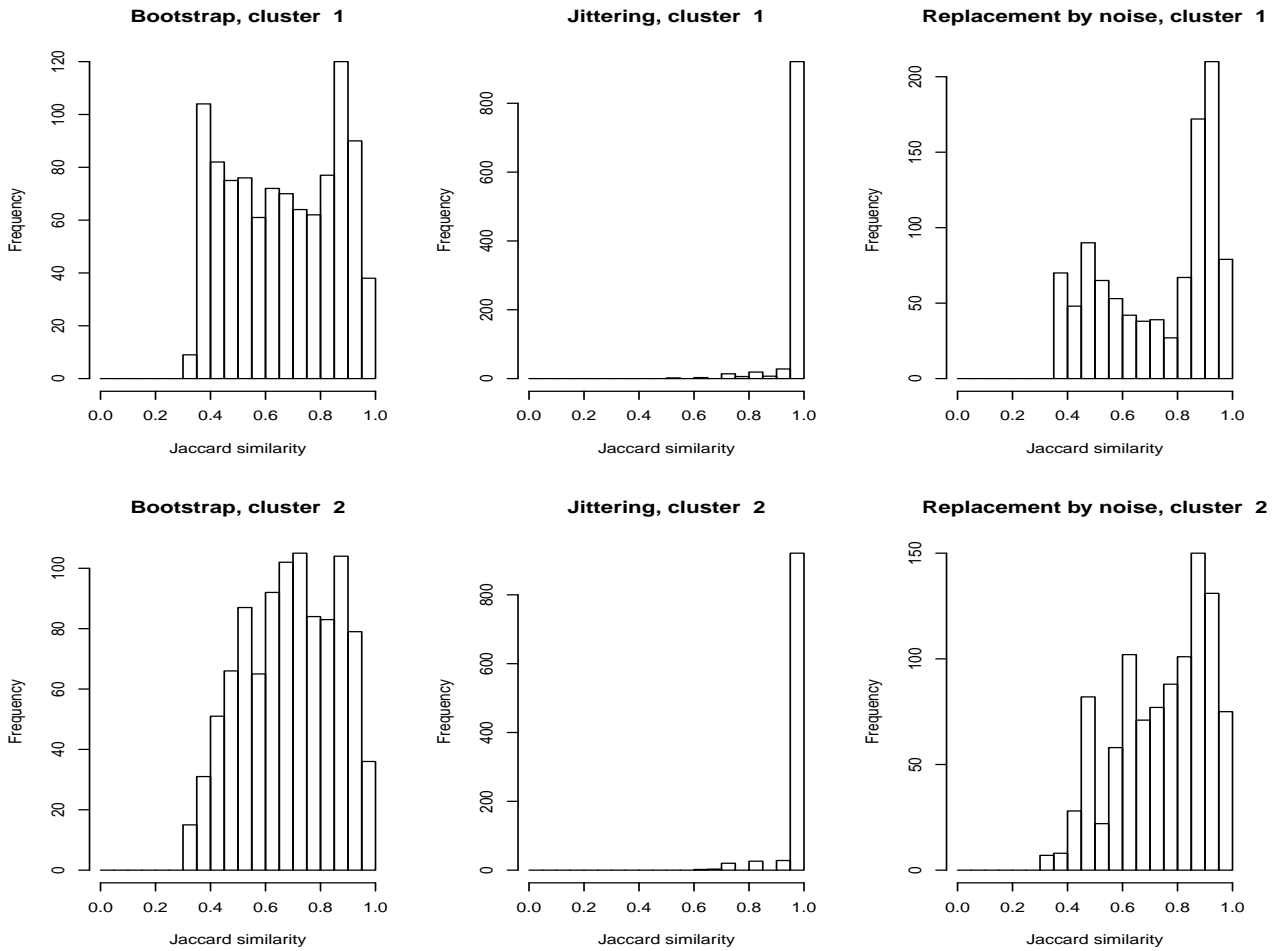

\* Cluster stability assessment \*

Cluster method: kmeans

Full clustering results are given as parameter result of the clusterboot object, which also provides further statistics of the resampling results.

Number of resampling runs: 1000

Number of clusters found in data: 2

Clusterwise Jaccard bootstrap mean:

[1] 0.6648033 0.6885693

dissolved:

[1] 270 163

recovered:

[1] 387 386

Clusterwise Jaccard jittering mean:

[1] 0.9868980 0.9864249

dissolved:

[1] 0 0

recovered:



```

[1] 981 975
Clusterwise Jaccard replacement by noise mean:
[1] 0.7334420 0.7464246
dissolved:
[1] 208 125
recovered:
[1] 555 545

```

*Removing one sample*

| Min. | 1st Qu. | Median | Mean | 3rd Qu. | Max. |
|------|---------|--------|------|---------|------|
| 1    | 1       | 1      | 1    | 1       | 1    |

*Removing one gene*

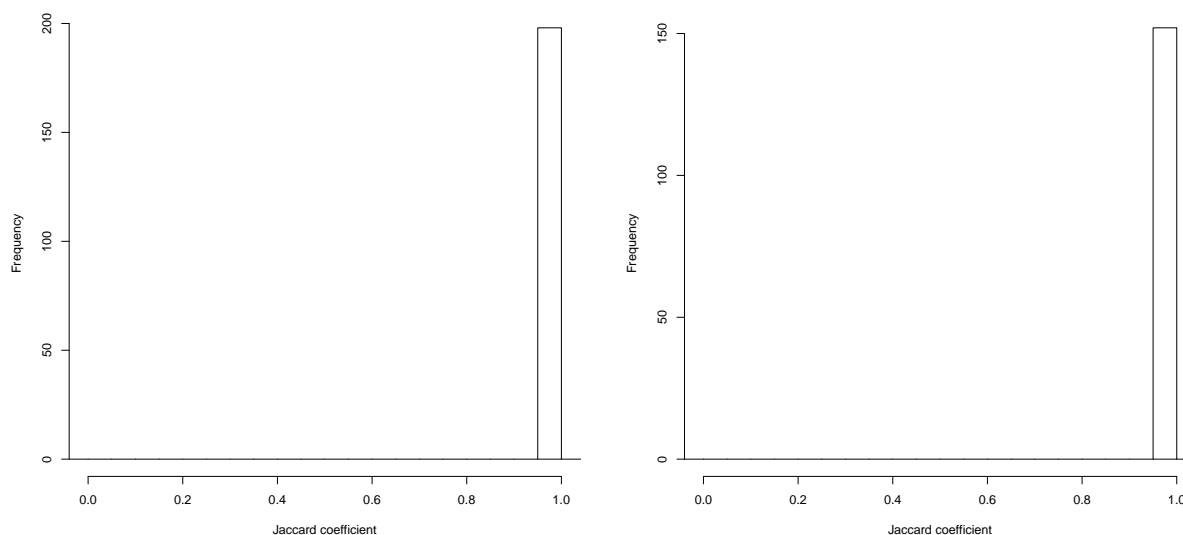

Figure 44: Removing one sample (left) and one gene (right) at a time: distributions of Jaccard coefficients

| Min.   | 1st Qu. | Median | Mean   | 3rd Qu. | Max.   |
|--------|---------|--------|--------|---------|--------|
| 0.9818 | 1.0000  | 1.0000 | 0.9990 | 1.0000  | 1.0000 |

| APN     |         | AD      |        | ADM     |        | FOM     |         |
|---------|---------|---------|--------|---------|--------|---------|---------|
| Min.    | :0.3603 | Min.    | :16.92 | Min.    | :5.044 | Min.    | :0.9655 |
| 1st Qu. | :0.3631 | 1st Qu. | :16.95 | 1st Qu. | :5.072 | 1st Qu. | :0.9942 |
| Median  | :0.3631 | Median  | :16.95 | Median  | :5.072 | Median  | :1.0005 |
| Mean    | :0.3633 | Mean    | :16.95 | Mean    | :5.076 | Mean    | :0.9971 |
| 3rd Qu. | :0.3631 | 3rd Qu. | :16.95 | 3rd Qu. | :5.072 | 3rd Qu. | :1.0037 |
| Max.    | :0.3653 | Max.    | :16.97 | Max.    | :5.114 | Max.    | :1.0045 |

*Removing sets of k genes*

| Min.   | 1st Qu. | Median | Mean   | 3rd Qu. | Max.   |
|--------|---------|--------|--------|---------|--------|
| 0.5432 | 0.8000  | 0.8475 | 0.8401 | 0.8909  | 0.9821 |

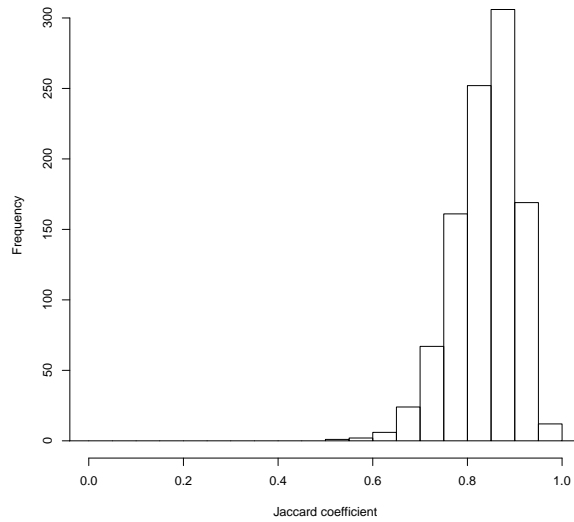

Figure 45: Removing two thirds of the genes: distribution of Jaccard coefficients

#### 6.4.6 Validation measures

Clustering Methods:

kmeans

Cluster sizes:

2 3 4 5 6

Validation Measures:

|        |              | 2       | 3        | 4        | 5        | 6        |
|--------|--------------|---------|----------|----------|----------|----------|
| kmeans | APN          | 0.0187  | 0.0227   | 0.0755   | 0.1782   | 0.2505   |
|        | AD           | 15.1103 | 14.3905  | 14.1193  | 14.0215  | 13.8292  |
|        | ADM          | 0.2734  | 0.2917   | 0.7709   | 1.7650   | 2.3576   |
|        | FOM          | 0.8845  | 0.8452   | 0.8288   | 0.8166   | 0.8030   |
|        | Connectivity | 51.4306 | 107.7202 | 131.1516 | 143.7472 | 155.8504 |
|        | Dunn         | 0.4221  | 0.3990   | 0.3982   | 0.4320   | 0.4480   |
|        | Silhouette   | 0.1893  | 0.1140   | 0.0852   | 0.0931   | 0.0880   |

Optimal Scores:

|              | Score   | Method | Clusters |
|--------------|---------|--------|----------|
| APN          | 0.0187  | kmeans | 2        |
| AD           | 13.8292 | kmeans | 6        |
| ADM          | 0.2734  | kmeans | 2        |
| FOM          | 0.8030  | kmeans | 6        |
| Connectivity | 51.4306 | kmeans | 2        |
| Dunn         | 0.4480  | kmeans | 6        |
| Silhouette   | 0.1893  | kmeans | 2        |

## 7 Sotiriou et al. (2006) dataset

### 7.1 LAS bicluster

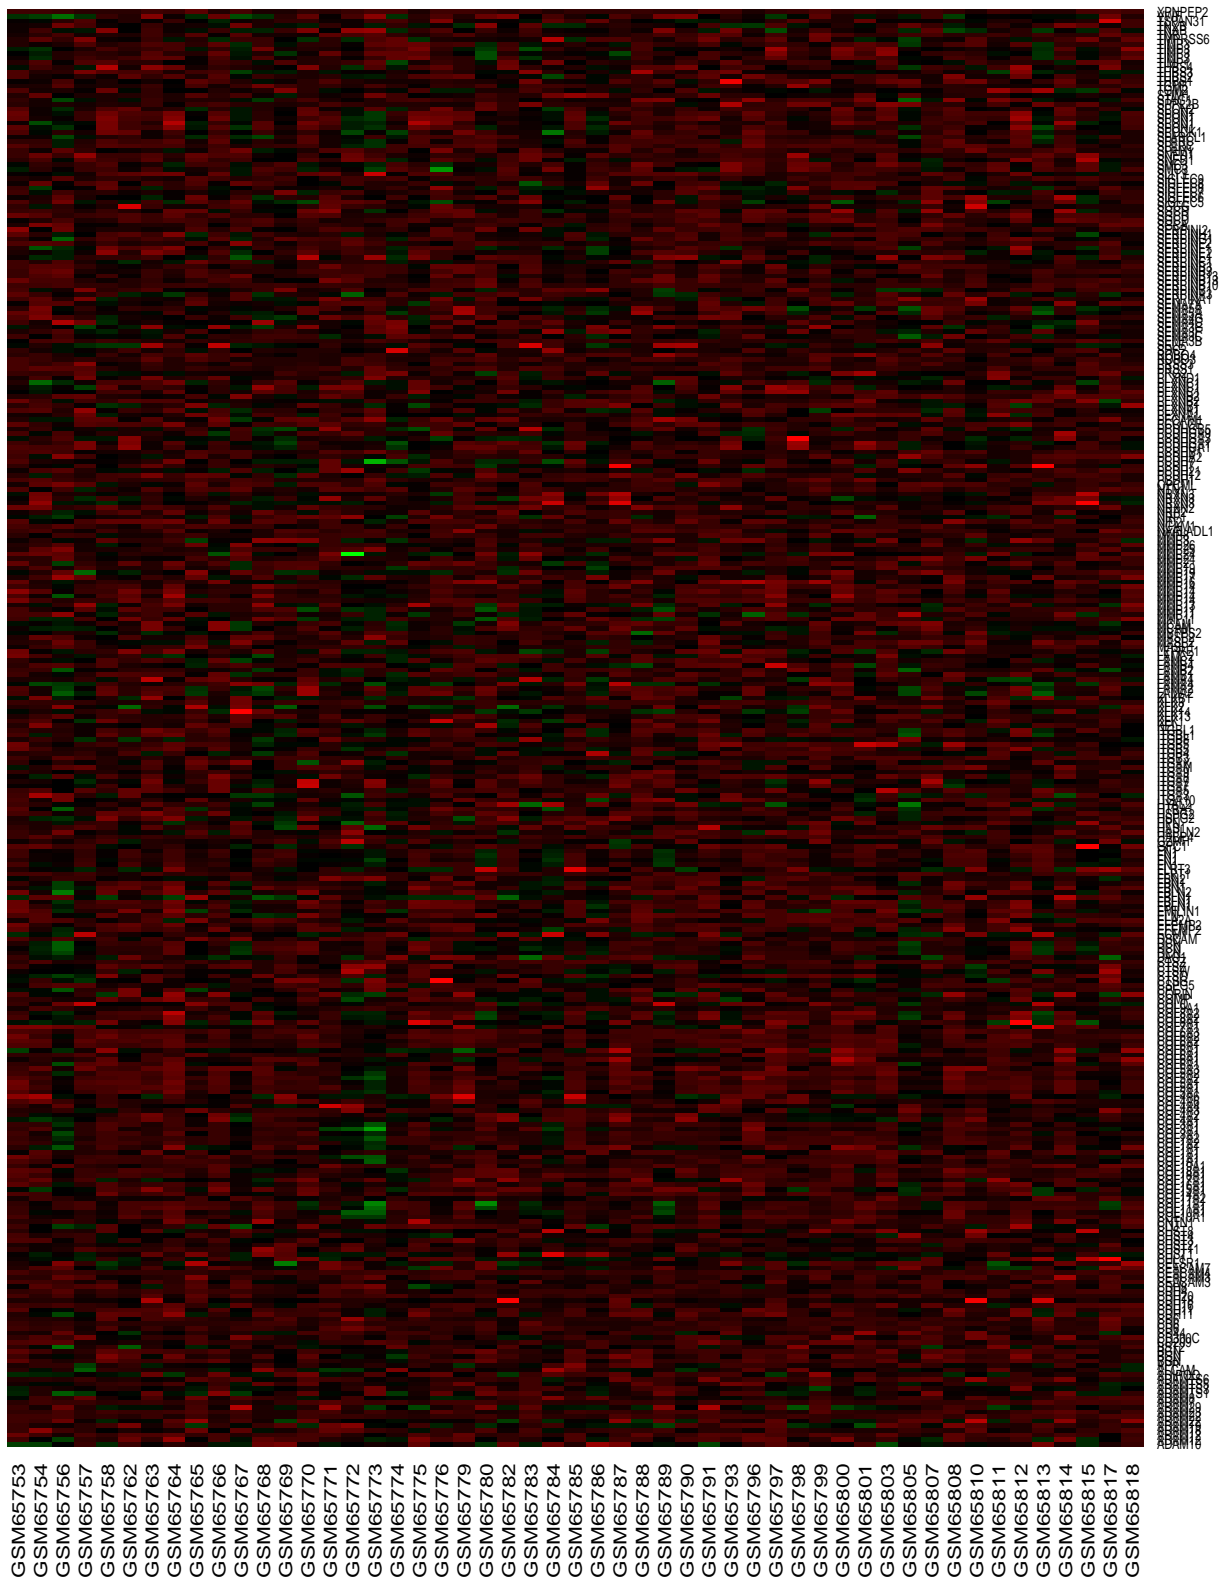

Figure 46: Heatmap of the LAS bicluster

*LAS genes*

|          |          |           |           |           |          |          |          |
|----------|----------|-----------|-----------|-----------|----------|----------|----------|
| ADAM10   | ADAM12   | ADAM12    | ADAM18    | ADAM19    | ADAM22   | ADAM22   | ADAM23   |
| ADAM29   | ADAM7    | ADAM8     | ADAMTS1   | ADAMTS3   | ADAMTS5  | ADAMTS6  | ADIPOQ   |
| ALCAM    | APP      | BGN       | BGN       | BGN       | BST2     | CD209    | CD300C   |
| CD44     | CD6      | CD6       | CD6       | CDH11     | CDH11    | CDH16    | CDH18    |
| CDH20    | CDH4     | CDH8      | CEACAM3   | CEACAM3   | CEACAM4  | CEACAM7  | CELSR1   |
| CHL1     | CHST1    | CHST11    | CHST2     | CHST3     | CHST4    | CHST8    | CLU      |
| CNTN1    | COL10A1  | COL10A1   | COL11A1   | COL11A1   | COL11A2  | COL14A1  | COL15A1  |
| COL16A1  | COL17A1  | COL18A1   | COL18A1   | COL19A1   | COL1A1   | COL1A1   | COL1A1   |
| COL1A1   | COL1A2   | COL1A2    | COL3A1    | COL3A1    | COL3A1   | COL4A1   | COL4A2   |
| COL4A3   | COL4A4   | COL4A6    | COL4A6    | COL5A1    | COL5A1   | COL5A1   | COL5A2   |
| COL5A2   | COL5A3   | COL6A1    | COL6A1    | COL6A1    | COL6A1   | COL6A1   | COL6A2   |
| COL6A2   | COL6A3   | COL7A1    | COL8A1    | COL8A2    | COL8A2   | COL9A1   | COLQ     |
| COMP     | CORIN    | CPE       | CSPG5     | CTSG      | CTS0     | CTSW     | CTSZ     |
| CTSZ     | DAG1     | DCN       | DCN       | DCN       | DSCAM    | ECM1     | EFEMP2   |
| EFEMP2   | ELA2A    | ELN       | EMILIN1   | FBLN1     | FBLN1    | FBLN1    | FBLN2    |
| FBN1     | FBN1     | FBN2      | FLRT1     | FLRT3     | FN1      | FN1      | FN1      |
| FN1      | GPC1     | GZMH      | HABP4     | HAPLN2    | HAS1     | HPN      | HSPG2    |
| HSPG2    | HTRA1    | HYAL2     | ITGA10    | ITGA3     | ITGA5    | ITGA7    | ITGA7    |
| ITGA8    | ITGA9    | ITGAM     | ITGAX     | ITGB3     | ITGB4    | ITGB5    | ITGB5    |
| ITGB8    | ITGBL1   | ITGBL1    | KEL       | KLK1      | KLK13    | KLK14    | KLK2     |
| KLK3     | KLKB1    | LAMA2     | LAMA2     | LAMA4     | LAMA4    | LAMB1    | LAMB2    |
| LAMB4    | LAMC1    | LAMC2     | LEPRE1    | MASP1     | MASP2    | MASP2    | MBTPS2   |
| MCAM     | MCAM     | MMP11     | MMP11     | MMP11     | MMP13    | MMP14    | MMP14    |
| MMP14    | MMP14    | MMP16     | MMP17     | MMP19     | MMP19    | MMP2     | MMP24    |
| MMP24    | MMP25    | MMP26     | MMP3      | MMP8      | NAALADL1 | NCAM1    | NID2     |
| NRP1     | NRP2     | NRXN2     | NRXN3     | NRXN3     | NRXN3    | NTN1     | OPCML    |
| PCDH1    | PCDH12   | PCDH21    | PCDH7     | PCDH7     | PCDHA2   | PCDHB1   | PCDHGA1  |
| PCDHGA1  | PCDHGA3  | PCDHGA9   | PCDHGB5   | PCOLCE    | PECAM1   | PLXNA1   | PLXNA1   |
| PLXNB1   | PLXNB2   | PLXNB2    | PLXNC1    | PLXNC1    | PLXNC1   | PLXND1   | PRG2     |
| PRSS1    | PRSS3    | ROBO3     | ROBO4     | SDC2      | SELE     | SEMA3B   | SEMA3C   |
| SEMA3F   | SEMA3G   | SEMA4C    | SEMA4G    | SEMA5A    | SEMA5A   | SEMA7A   | SERPINA1 |
| SERPINA3 | SERPINB1 | SERPINB10 | SERPINB13 | SERPINB13 | SERPINB3 | SERPINB3 | SERPINC1 |
| SERPINE1 | SERPINE2 | SERPINF1  | SERPINF2  | SERPING1  | SERPINH1 | SERPINI2 | SGCA     |
| SGCD     | SGCD     | SGCD      | SGCG      | SIGLEC5   | SIGLEC6  | SIGLEC7  | SIGLEC8  |
| SIGLEC8  | SIGLEC9  | SLIT3     | SMC3      | SMC3      | SNED1    | SNED1    | SPAM1    |
| SPARC    | SPARC    | SPARCL1   | SPOCK1    | SPON1     | SPON1    | SPON1    | SPON1    |
| SPON2    | SPPL2B   | STAG1     | STIM1     | TGM2      | TGM5     | THBS1    | THBS2    |
| THBS3    | THBS4    | TIMP1     | TIMP3     | TIMP3     | TIMP3    | TIMP3    | TMPRSS6  |
| TNR      | TNXB     | TNXB      | TSPAN31   | VWF       | XPNPEP2  |          |          |

*LAS samples*

|          |          |          |          |          |          |          |          |
|----------|----------|----------|----------|----------|----------|----------|----------|
| GSM65753 | GSM65754 | GSM65756 | GSM65757 | GSM65758 | GSM65762 | GSM65763 | GSM65764 |
| GSM65765 | GSM65766 | GSM65767 | GSM65768 | GSM65769 | GSM65770 | GSM65771 | GSM65772 |
| GSM65773 | GSM65774 | GSM65775 | GSM65776 | GSM65779 | GSM65780 | GSM65782 | GSM65783 |
| GSM65784 | GSM65785 | GSM65786 | GSM65787 | GSM65788 | GSM65789 | GSM65790 | GSM65791 |
| GSM65793 | GSM65796 | GSM65797 | GSM65798 | GSM65799 | GSM65800 | GSM65801 | GSM65803 |
| GSM65805 | GSM65807 | GSM65808 | GSM65810 | GSM65811 | GSM65812 | GSM65813 | GSM65814 |
| GSM65815 | GSM65817 | GSM65818 |          |          |          |          |          |

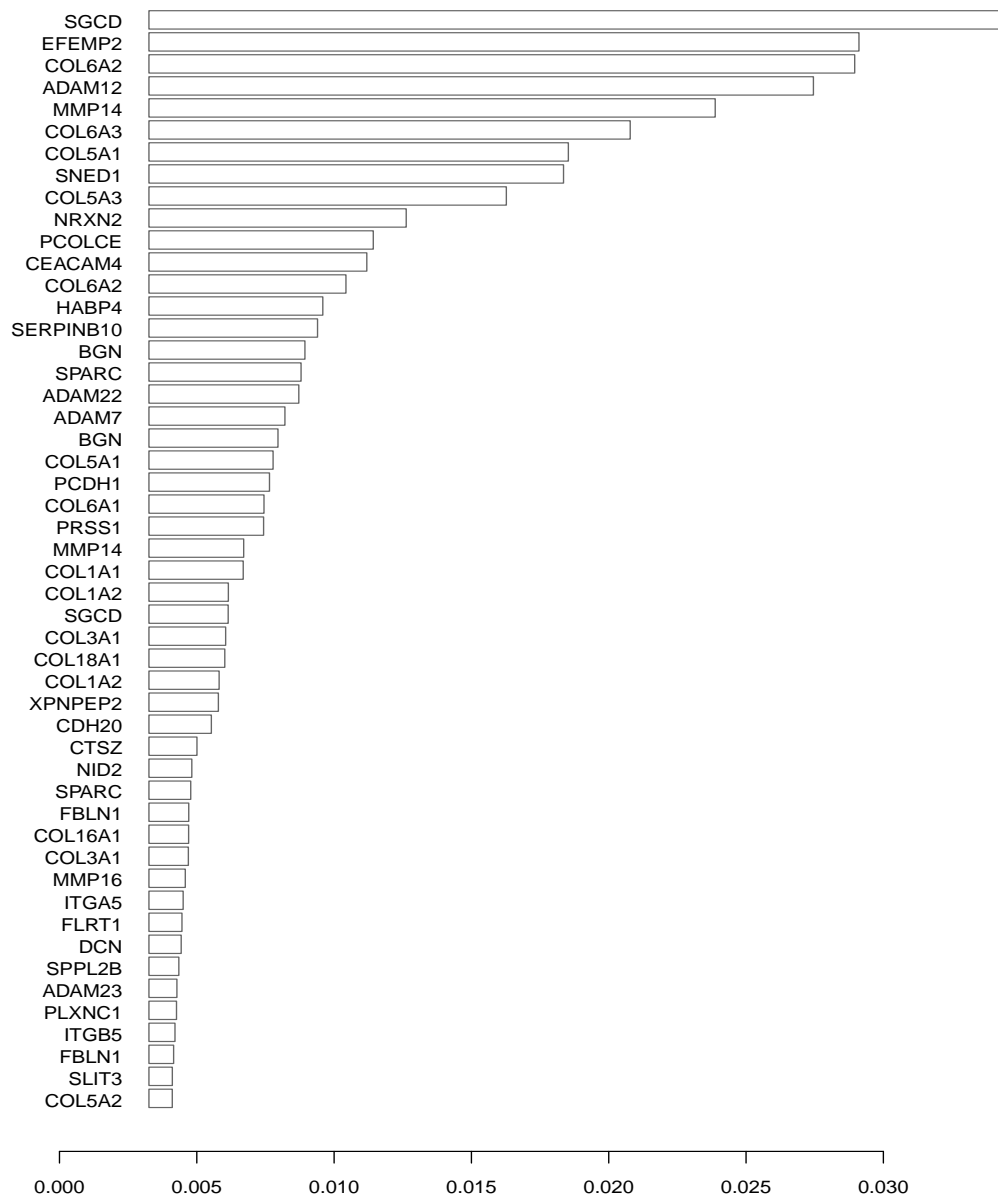

Figure 47: Most informative genes for the LAS bicluster

Number of informative genes of the LAS bicluster that also belong to the ECM3 consensus list: 29 of 34 (85%)

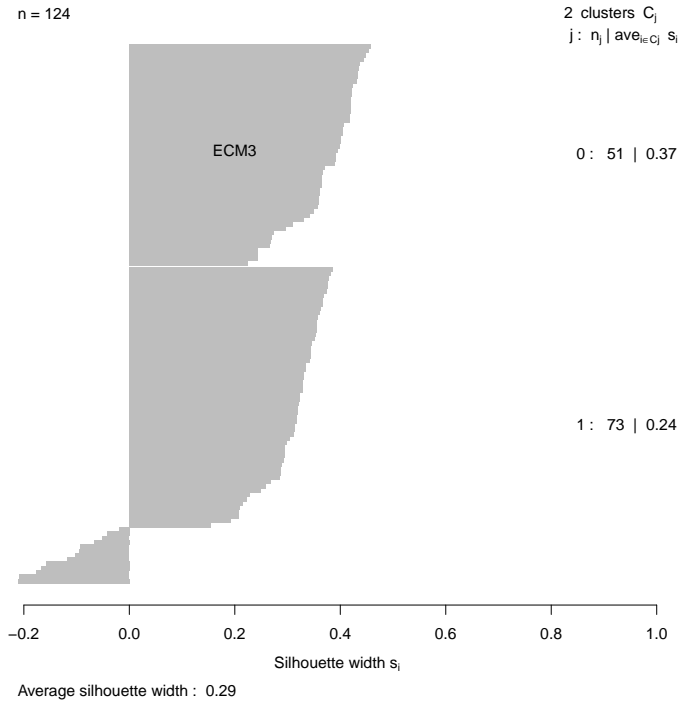

Figure 48: Silhouette plot for the LAS bicluster

| Connectivity | Dunn Index |
|--------------|------------|
| 12.88        | 0.38       |

Table 36: Connectivity validation measure and Dunn Index of LAS partitioning

## 7.2 IRCC-KM bicluster

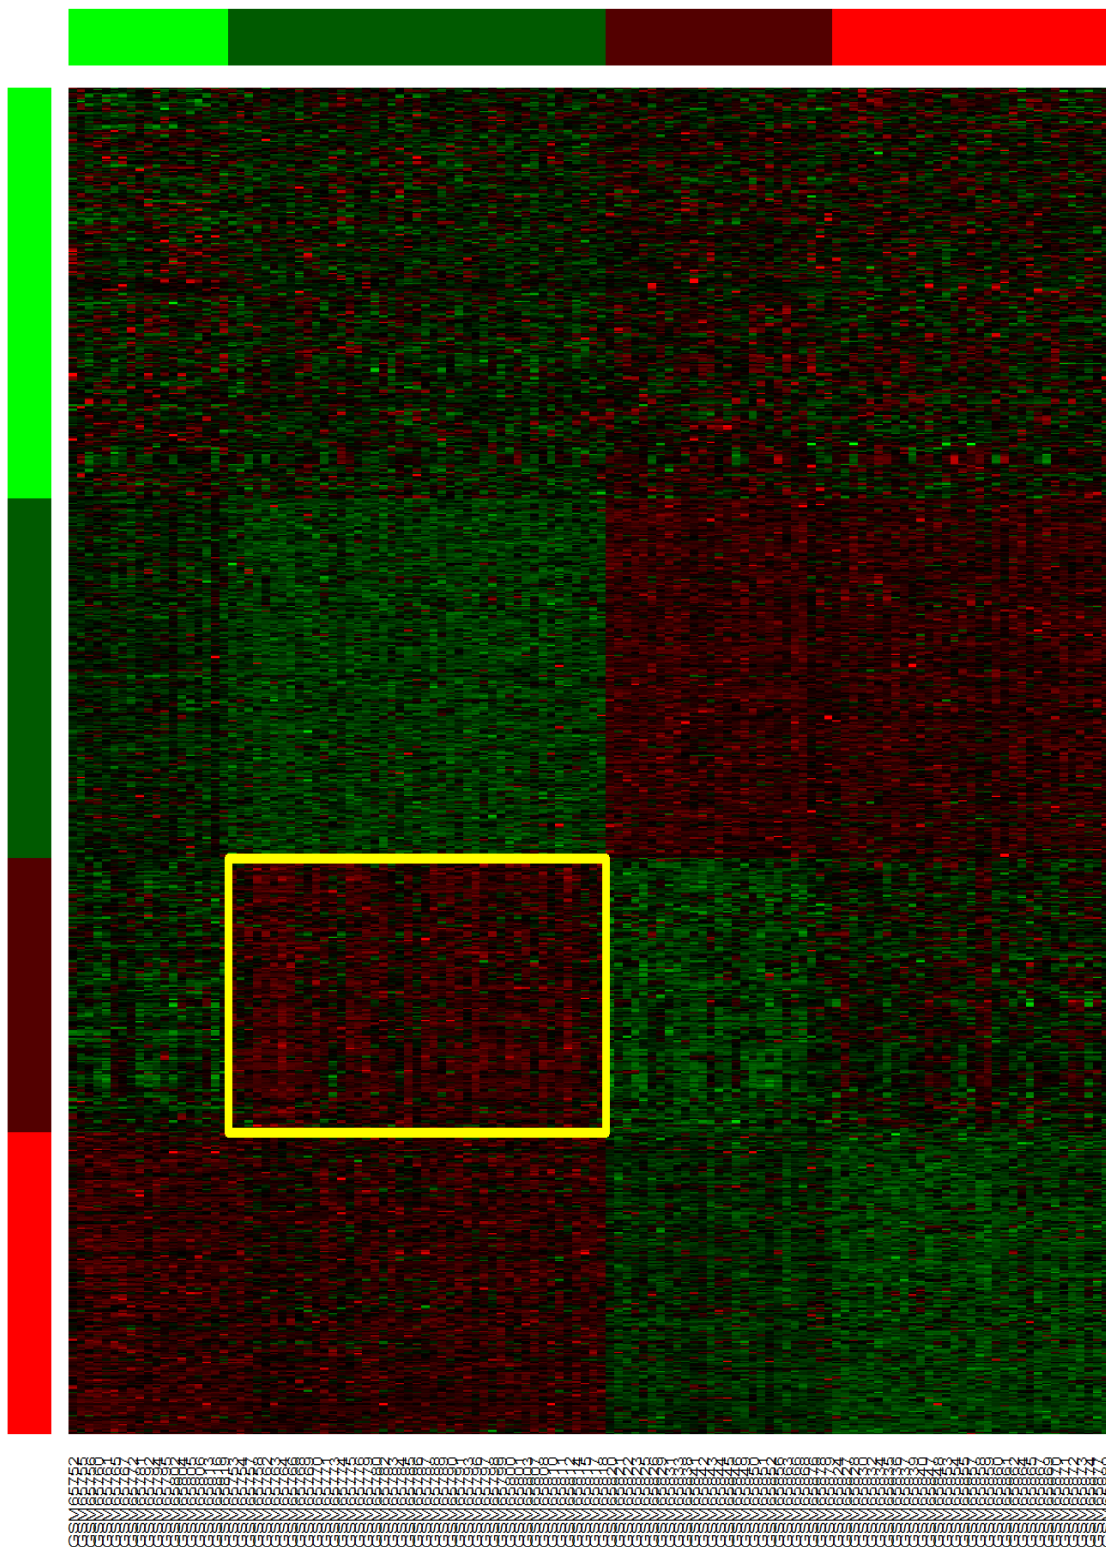

Figure 49: Heatmap of the IRCC-KM bicluster

*IRCC-KM genes*

|          |          |          |          |          |          |          |         |
|----------|----------|----------|----------|----------|----------|----------|---------|
| ADAM12   | ADAM12   | ADAMTS1  | ADAMTS5  | ADAMTSL2 | ADIPOQ   | ALCAM    | ALCAM   |
| APP      | APP      | BGN      | BGN      | BGN      | CD36     | CDH11    | CDH11   |
| CDH5     | CELSR1   | CHL1     | CHST10   | CHSY1    | CLU      | CLU      | COL10A1 |
| COL10A1  | COL11A1  | COL11A1  | COL14A1  | COL15A1  | COL16A1  | COL18A1  | COL1A1  |
| COL1A1   | COL1A1   | COL1A2   | COL1A2   | COL3A1   | COL3A1   | COL3A1   | COL4A1  |
| COL4A5   | COL4A6   | COL5A1   | COL5A1   | COL5A1   | COL5A2   | COL5A2   | COL5A3  |
| COL5A3   | COL6A1   | COL6A1   | COL6A1   | COL6A1   | COL6A2   | COL6A2   | COL6A3  |
| COL8A1   | COL8A2   | COL8A2   | COMP     | CORIN    | CPE      | CTSK     | CTSO    |
| DAG1     | DCN      | DCN      | DCN      | DCN      | ECM1     | EFEMP1   | EFEMP2  |
| EFEMP2   | ELN      | EMILIN1  | ENPEP    | FBLN1    | FBLN1    | FBLN1    | FBLN2   |
| FBLN5    | FBN1     | FBN1     | FLRT2    | FLRT2    | FN1      | FN1      | FN1     |
| FN1      | FN1      | GPC1     | HSPG2    | HSPG2    | HTRA1    | HYAL2    | ITGB1   |
| ITGB5    | ITGB5    | ITGBL1   | ITGBL1   | LAMA2    | LAMA2    | LAMA2    | LAMA4   |
| LAMA4    | LAMB1    | LAMB1    | LAMB2    | LAMC1    | LAMC1    | LEPRE1   | MATN3   |
| MCAM     | MCAM     | MCAM     | MGEA5    | MMP11    | MMP11    | MMP13    | MMP14   |
| MMP14    | MMP16    | MMP19    | MMP2     | MMP3     | NID1     | NID1     | NID2    |
| NRP1     | PCDH1    | PCDH7    | PCDH7    | PCDHGA1  | PCDHGA1  | PCDHGA1  | PCDHGA1 |
| PCOLCE   | PECAM1   | PLXNA1   | PLXNB1   | PLXNB2   | PLXNC1   | PLXND1   | PLXND1  |
| PLXDC1   | PRSS16   | ROBO1    | SDC4     | SEMA3C   | SEMA3G   | SEMA5A   | SEMA5A  |
| SERPINA3 | SERPINB1 | SERPINE1 | SERPINE2 | SERPINF1 | SERPING1 | SERPINH1 | SGCB    |
| SGCE     | SLIT2    | SLIT3    | SNED1    | SPARC    | SPARC    | SPARCL1  | SPG20   |
| SPOCK1   | SPON1    | SPON1    | SPON1    | SPON1    | SPON2    | STAG1    | THBS2   |
| THBS3    | THBS4    | TIMP3    | TIMP3    | TIMP3    | TIMP3    | TNXB     | TSPAN15 |
| VWF      |          |          |          |          |          |          |         |

*IRCC-KM samples*

|          |          |          |          |          |          |          |          |
|----------|----------|----------|----------|----------|----------|----------|----------|
| GSM65753 | GSM65754 | GSM65757 | GSM65758 | GSM65762 | GSM65763 | GSM65764 | GSM65766 |
| GSM65768 | GSM65769 | GSM65770 | GSM65771 | GSM65773 | GSM65774 | GSM65775 | GSM65776 |
| GSM65779 | GSM65780 | GSM65782 | GSM65783 | GSM65784 | GSM65785 | GSM65786 | GSM65787 |
| GSM65788 | GSM65789 | GSM65790 | GSM65791 | GSM65793 | GSM65796 | GSM65797 | GSM65798 |
| GSM65799 | GSM65800 | GSM65801 | GSM65803 | GSM65807 | GSM65808 | GSM65810 | GSM65811 |
| GSM65812 | GSM65814 | GSM65815 | GSM65817 | GSM65818 |          |          |          |



### 7.2.1 Comparing LAS and IRCC-KM biclusters

|                    | No ECM | ECM3 |
|--------------------|--------|------|
| No ECM3            | 553    | 171  |
| ECM3               | 46     | 139  |
| Jaccard similarity | 0.39   |      |

Table 37: Comparing gene lists: LAS (column) vs. IRCC-KM bicluster (row)

|                    | No ECM | ECM3 |
|--------------------|--------|------|
| No ECM3            | 73     | 6    |
| ECM3               | 0      | 45   |
| Jaccard similarity | 0.88   |      |

Table 38: Comparing sample lists: LAS (column) vs. IRCC-KM bicluster (row)

### 7.3 IRCC-HC bicluster

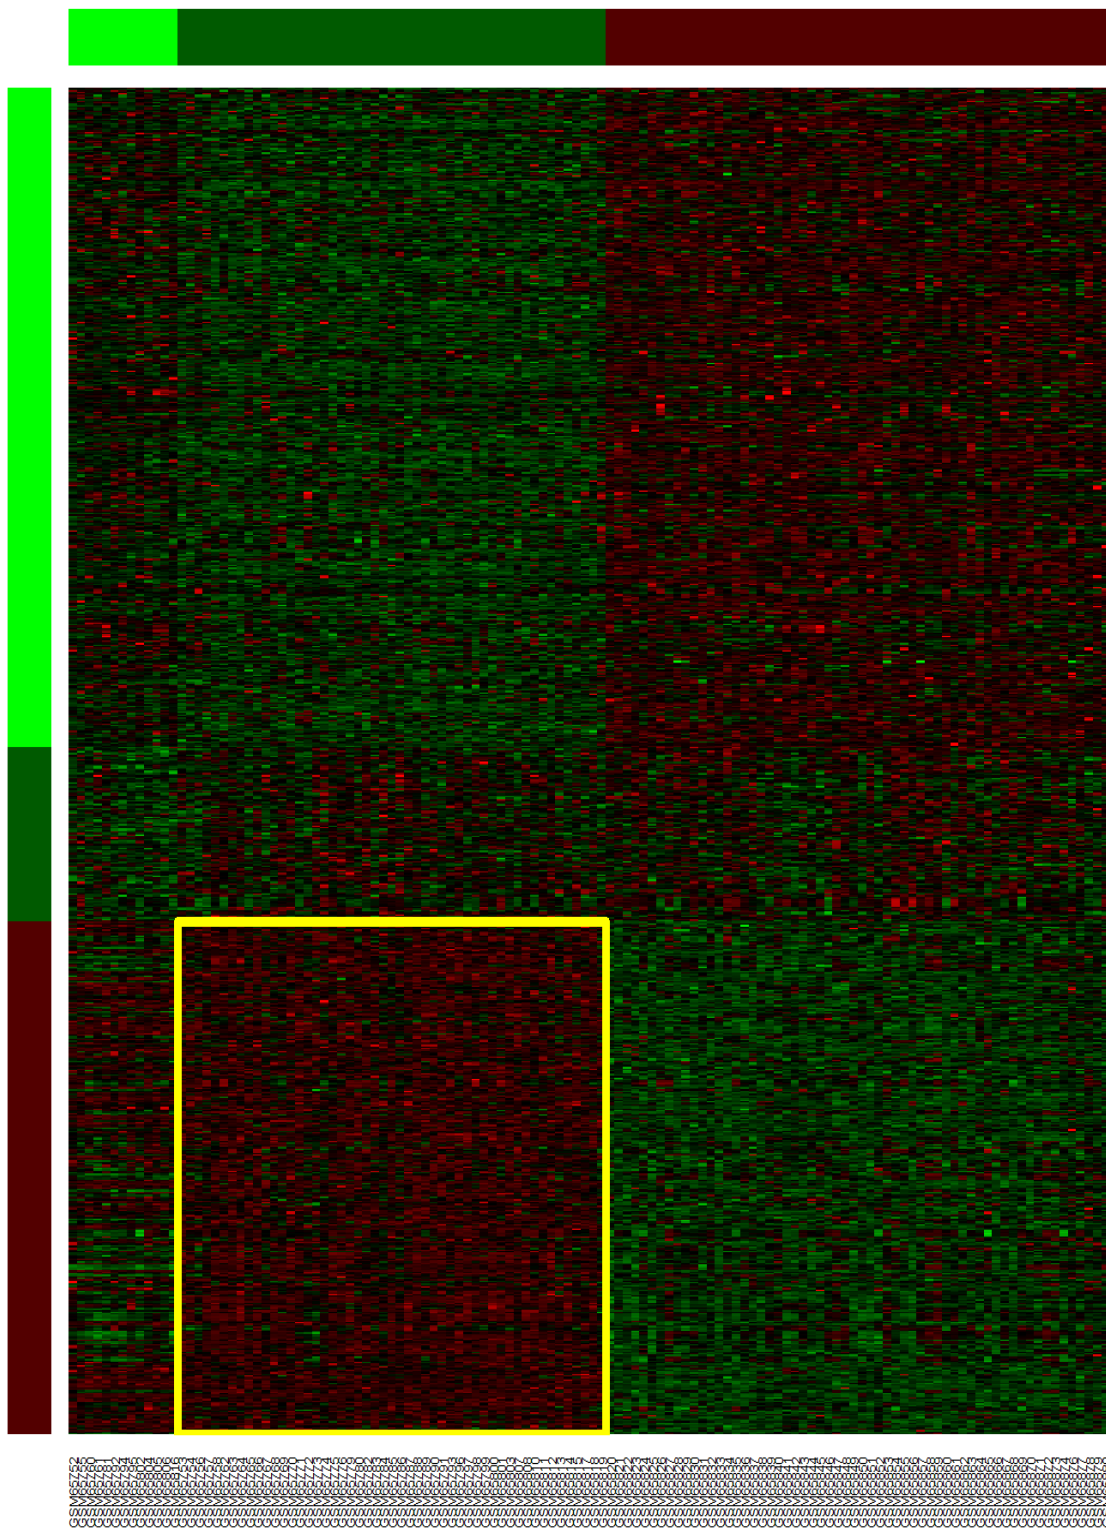

Figure 50: Heatmap of the IRCC-HC bicluster

*IRCC-HC genes*

|           |           |           |          |          |          |          |          |
|-----------|-----------|-----------|----------|----------|----------|----------|----------|
| ADAM12    | ADAM12    | ADAM18    | ADAM19   | ADAM20   | ADAM22   | ADAM22   | ADAM23   |
| ADAM29    | ADAM7     | ADAM8     | ADAMTS1  | ADAMTS3  | ADAMTS5  | ADAMTS6  | ADIPOQ   |
| APP       | APP       | APP       | BGN      | BGN      | BGN      | CD209    | CD300C   |
| CD44      | CD6       | CD6       | CD6      | CDH11    | CDH11    | CDH16    | CDH18    |
| CDH20     | CDH4      | CDH8      | CEACAM3  | CEACAM3  | CEACAM4  | CEACAM7  | CELSR1   |
| CHL1      | CHST11    | CHST2     | CHST3    | CHST4    | CHST8    | CHSY1    | CNTN1    |
| CNTN6     | COL10A1   | COL10A1   | COL11A1  | COL11A1  | COL11A2  | COL14A1  | COL15A1  |
| COL16A1   | COL17A1   | COL18A1   | COL18A1  | COL19A1  | COL1A1   | COL1A1   | COL1A1   |
| COL1A1    | COL1A2    | COL1A2    | COL3A1   | COL3A1   | COL3A1   | COL4A1   | COL4A1   |
| COL4A2    | COL4A2    | COL4A3    | COL4A4   | COL4A6   | COL5A1   | COL5A1   | COL5A1   |
| COL5A2    | COL5A2    | COL5A3    | COL5A3   | COL6A1   | COL6A1   | COL6A1   | COL6A1   |
| COL6A1    | COL6A1    | COL6A2    | COL6A2   | COL6A3   | COL7A1   | COL8A1   | COL8A2   |
| COL8A2    | COL9A1    | COL9A3    | COLQ     | COMP     | CORIN    | CSPG4    | CSPG4    |
| CSPG5     | CTSB      | CTSG      | CTSK     | CTS0     | CTSZ     | CTSZ     | DCN      |
| DCN       | DCN       | DCN       | DSCAM    | EFEMP2   | EFEMP2   | ELA2A    | ELN      |
| EMILIN1   | FBLN1     | FBLN1     | FBLN1    | FBLN2    | FBLN5    | FBN1     | FBN1     |
| FBN2      | FBN2      | FLRT1     | FLRT2    | FLRT2    | FLRT3    | FN1      | FN1      |
| FN1       | FN1       | GPC1      | HABP4    | HAPLN2   | HAS1     | HPN      | HSPG2    |
| HSPG2     | HTRA1     | ITGA10    | ITGA3    | ITGA5    | ITGA7    | ITGA7    | ITGA8    |
| ITGA9     | ITGAM     | ITGAX     | ITGB1    | ITGB3    | ITGB3    | ITGB3    | ITGB4    |
| ITGB4     | ITGB5     | ITGB5     | ITGB8    | ITGBL1   | ITGBL1   | KEL      | KLK1     |
| KLK13     | KLK2      | KLK3      | KLKB1    | LAMA2    | LAMA2    | LAMA2    | LAMA4    |
| LAMA4     | LAMA4     | LAMB1     | LAMB1    | LAMB4    | LAMC1    | LAMC1    | LAMC2    |
| LEPRE1    | MASP1     | MASP2     | MASP2    | MATN3    | MBTPS2   | MCAM     | MCAM     |
| MCAM      | MGEA5     | MMP11     | MMP11    | MMP11    | MMP13    | MMP14    | MMP14    |
| MMP14     | MMP14     | MMP16     | MMP17    | MMP19    | MMP19    | MMP2     | MMP24    |
| MMP24     | MMP25     | MMP26     | MMP3     | MMP8     | NAALADL1 | NCAM1    | NCAM1    |
| NID1      | NID2      | NRP1      | NRP2     | NRP2     | NRXN2    | NRXN3    | NRXN3    |
| NRXN3     | NTN1      | OPCML     | P11      | PCDH1    | PCDH12   | PCDH21   | PCDH7    |
| PCDH7     | PCDHA2    | PCDHB1    | PCDHGA1  | PCDHGA1  | PCDHGA1  | PCDHGA1  | PCDHGA3  |
| PCDHGA9   | PCDHGB5   | PCOLCE    | PECAM1   | PLXNA1   | PLXNA1   | PLXNB1   | PLXNB2   |
| PLXNB2    | PLXNC1    | PLXNC1    | PLXNC1   | PLXND1   | PLXND1   | PRG2     | PRSS1    |
| PRSS16    | PRSS3     | ROBO1     | ROBO3    | ROBO4    | SDC2     | SELE     | SEMA3B   |
| SEMA3F    | SEMA3G    | SEMA4G    | SEMA5A   | SEMA5A   | SEMA7A   | SERBP1   | SERPINA1 |
| SERPINB10 | SERPINB13 | SERPINB13 | SERPINB3 | SERPINB3 | SERPINB4 | SERPINB7 | SERPINB8 |
| SERPINC1  | SERPIND1  | SERPINE1  | SERPINE1 | SERPINE2 | SERPINF1 | SERPINF2 | SERPING1 |
| SERPINH1  | SERPINI2  | SGCA      | SGCB     | SGCB     | SGCD     | SGCD     | SGCD     |
| SGCE      | SGCG      | SIGLEC5   | SIGLEC6  | SIGLEC7  | SIGLEC7  | SIGLEC8  | SIGLEC8  |
| SIGLEC9   | SLIT2     | SLIT3     | SMC3     | SMC3     | SNED1    | SNED1    | SPAM1    |
| SPAM1     | SPARC     | SPARC     | SPARCL1  | SPG20    | SPOCK1   | SPON1    | SPON1    |
| SPON1     | SPON1     | SPON2     | SPPL2B   | STAG1    | STIM1    | TGM5     | THBS1    |
| THBS2     | THBS3     | THBS4     | TIMP1    | TIMP2    | TIMP3    | TIMP3    | TIMP3    |
| TIMP3     | TMPRSS6   | TNR       | TNXB     | TNXB     | TSPAN12  | TSPAN31  | TSPAN32  |
| VWF       | XPNPEP2   |           |          |          |          |          |          |

*IRCC-HC samples*

GSM65753 GSM65754 GSM65756 GSM65757 GSM65758 GSM65762 GSM65763 GSM65764  
 GSM65765 GSM65766 GSM65767 GSM65768 GSM65769 GSM65770 GSM65771 GSM65772  
 GSM65773 GSM65774 GSM65775 GSM65776 GSM65779 GSM65780 GSM65782 GSM65783  
 GSM65784 GSM65785 GSM65786 GSM65787 GSM65788 GSM65789 GSM65790 GSM65791  
 GSM65793 GSM65796 GSM65797 GSM65798 GSM65799 GSM65800 GSM65801 GSM65803  
 GSM65807 GSM65808 GSM65810 GSM65811 GSM65812 GSM65813 GSM65814 GSM65815  
 GSM65817 GSM65818 GSM65819

### 7.3.1 Comparing LAS and IRCC-HC biclusters

|                    | No ECM | ECM3 |
|--------------------|--------|------|
| No ECM3            | 544    | 19   |
| ECM3               | 55     | 291  |
| Jaccard similarity | 0.80   |      |

Table 39: Comparing gene lists: LAS (column) vs. IRCC-HC bicluster (row)

|                    | No ECM | ECM3 |
|--------------------|--------|------|
| No ECM3            | 72     | 1    |
| ECM3               | 1      | 50   |
| Jaccard similarity | 0.96   |      |

Table 40: Comparing sample lists: LAS (column) vs. IRCC-HC bicluster (row)

## 7.4 CCSS bicluster

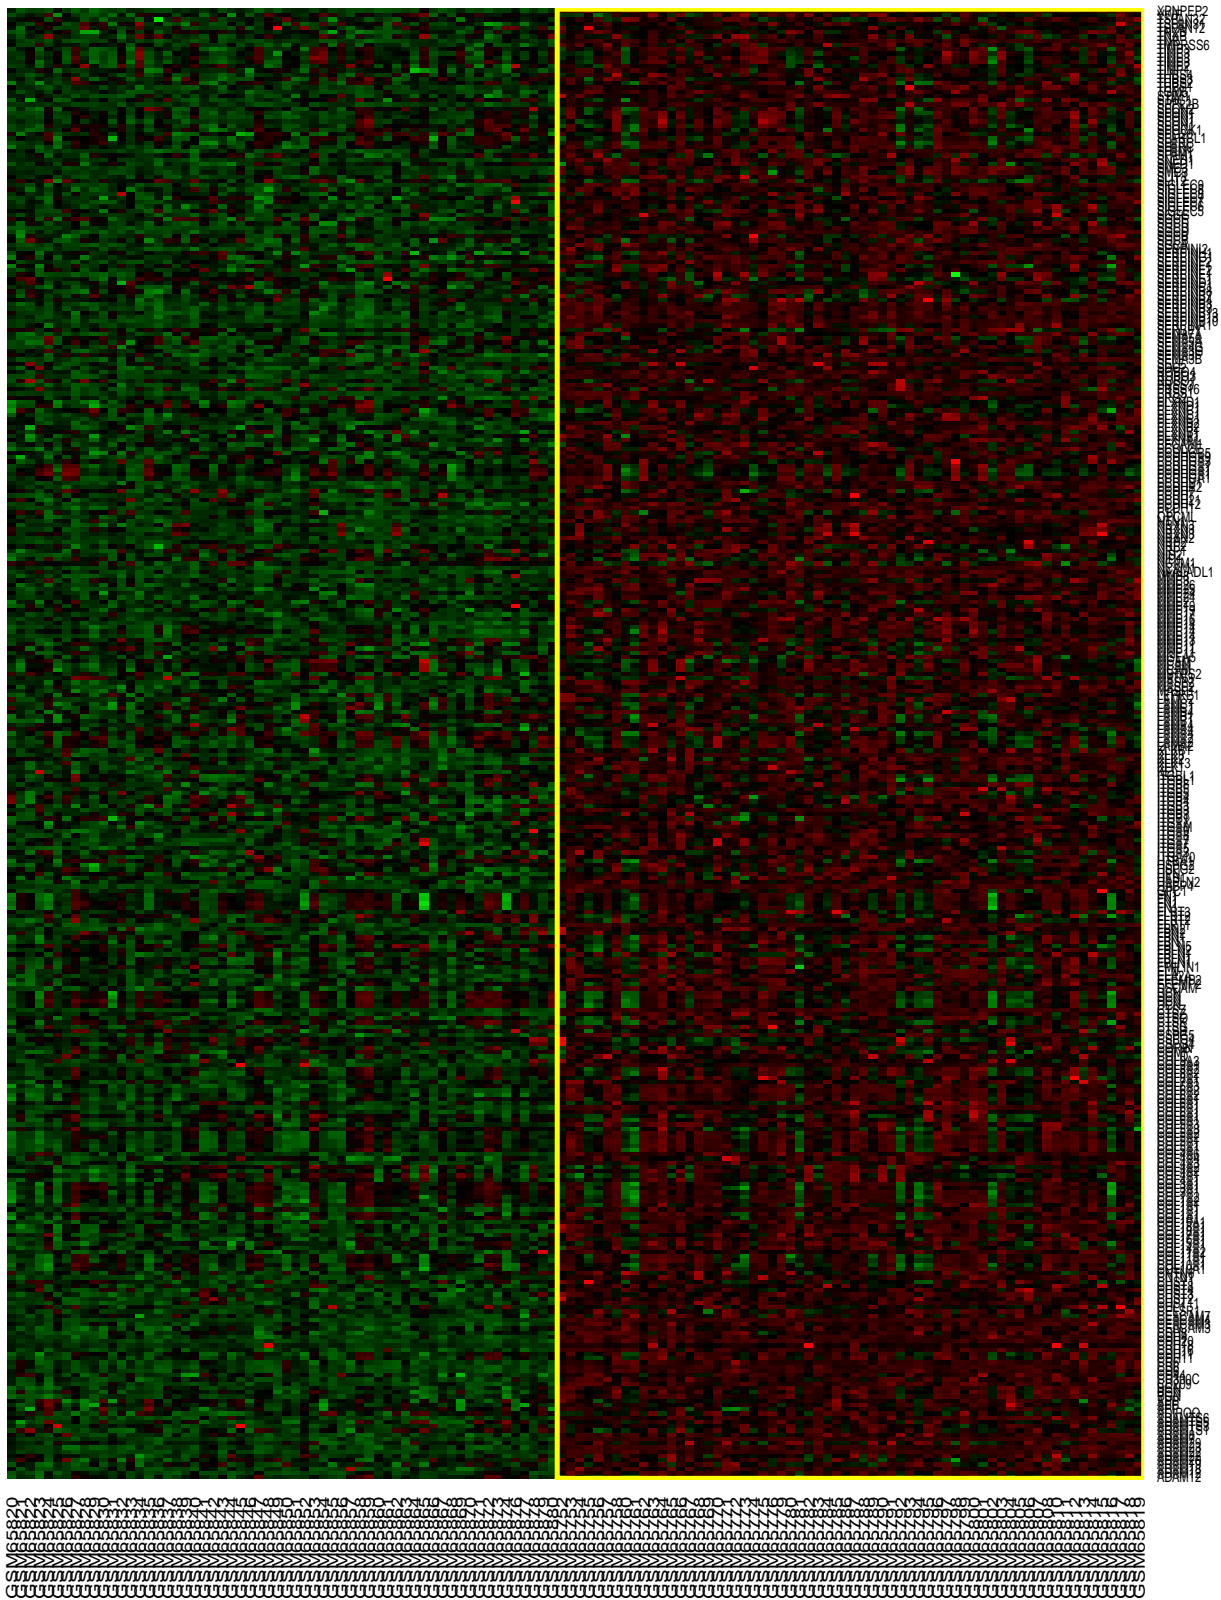

Figure 51: Heatmap of the CCSS bicluster

### 7.4.1 Comparing LAS and CCSS biclusters

|                    | No ECM | ECM3 |
|--------------------|--------|------|
| No ECM3            | 60     | 0    |
| ECM3               | 13     | 51   |
| Jaccard similarity | 0.80   |      |

Table 41: Comparing sample lists: LAS (column) vs. CCSS (row) biclusters

### 7.4.2 Prediction strength for CCSS

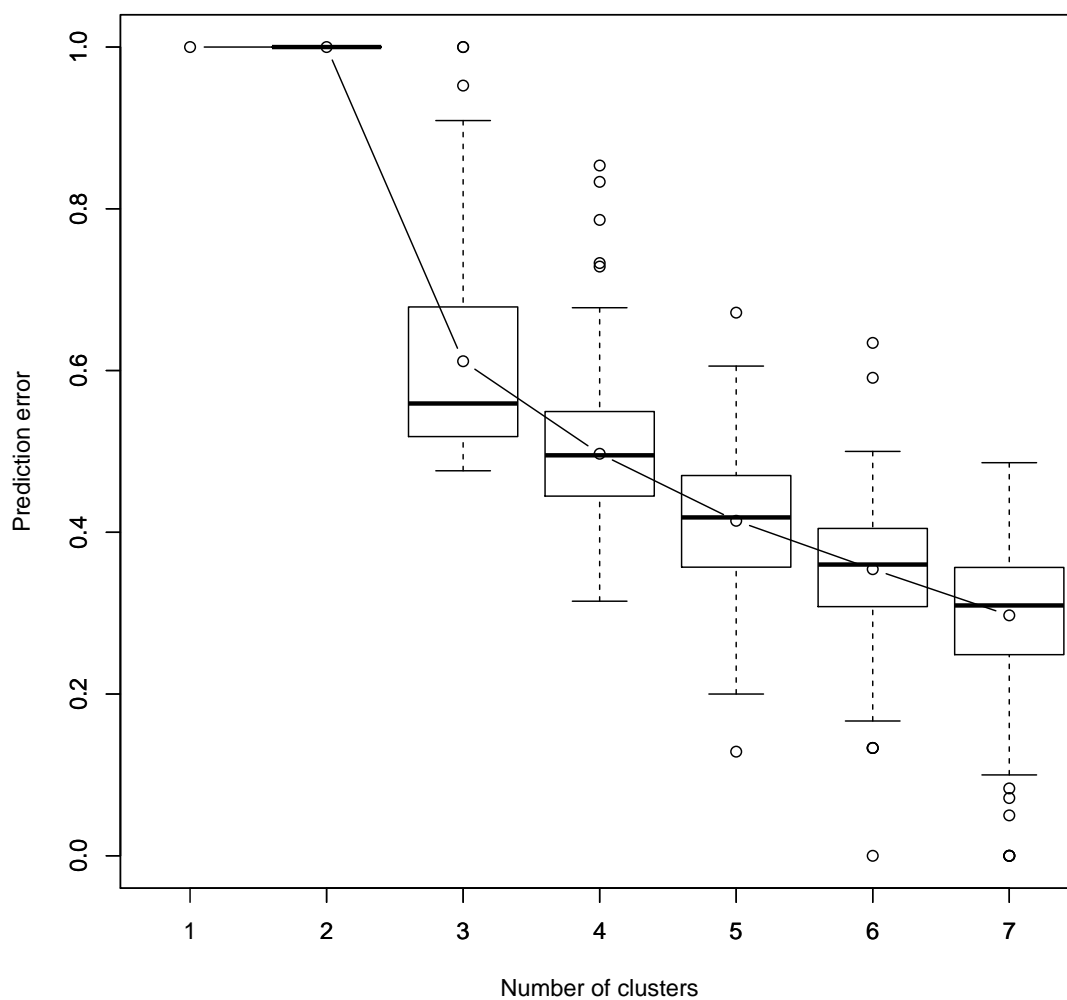

### 7.4.3 Consensus clustering

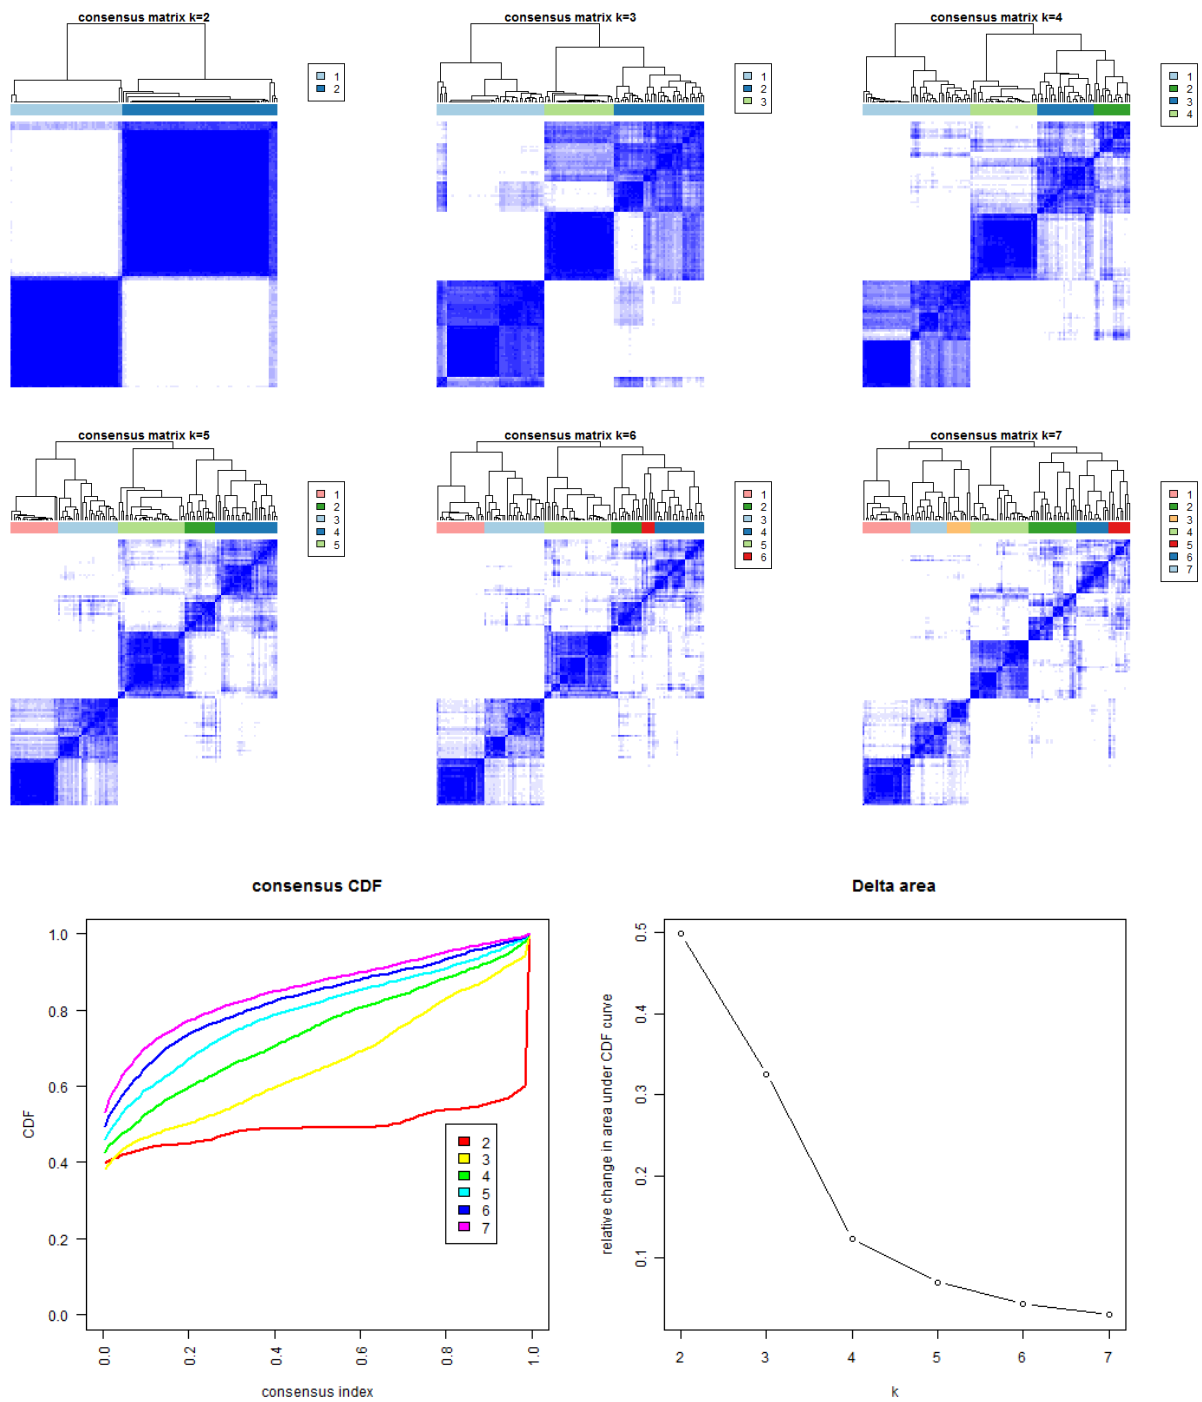

Figure 52: Statistical significance of CCSS clustering (Consensus clustering )

## 7.4.4 Statistical significance

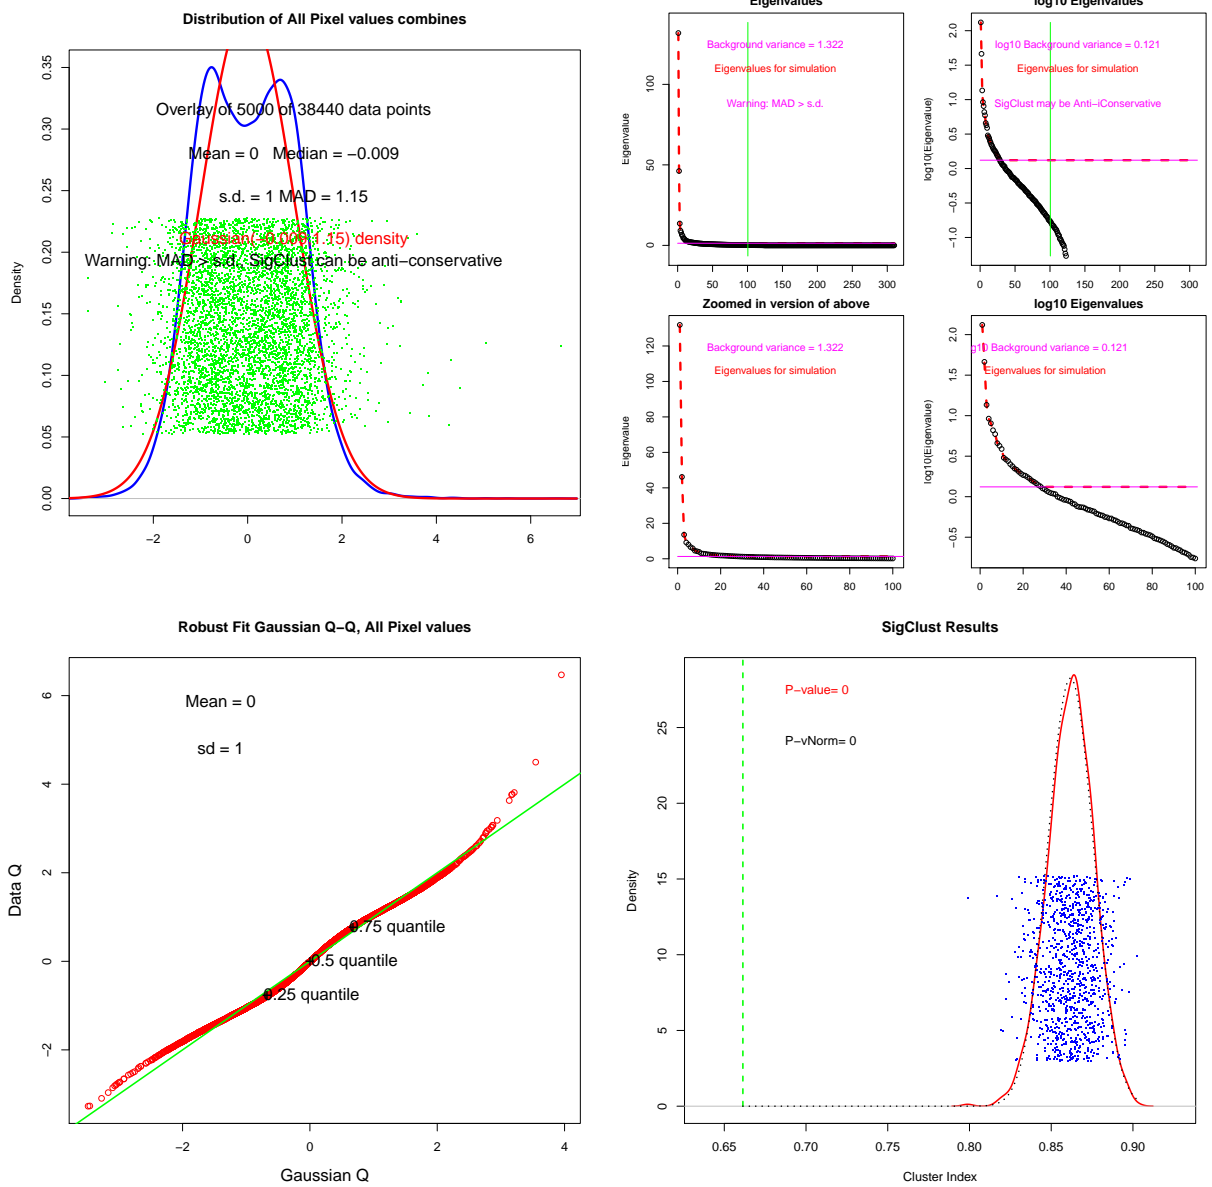

| P-value | P-vNorm |
|---------|---------|
| 0.0E+00 | 4.7E-46 |

Table 42: SigClust p-values



## 7.4.5 Cluster-wise assessment of cluster stability

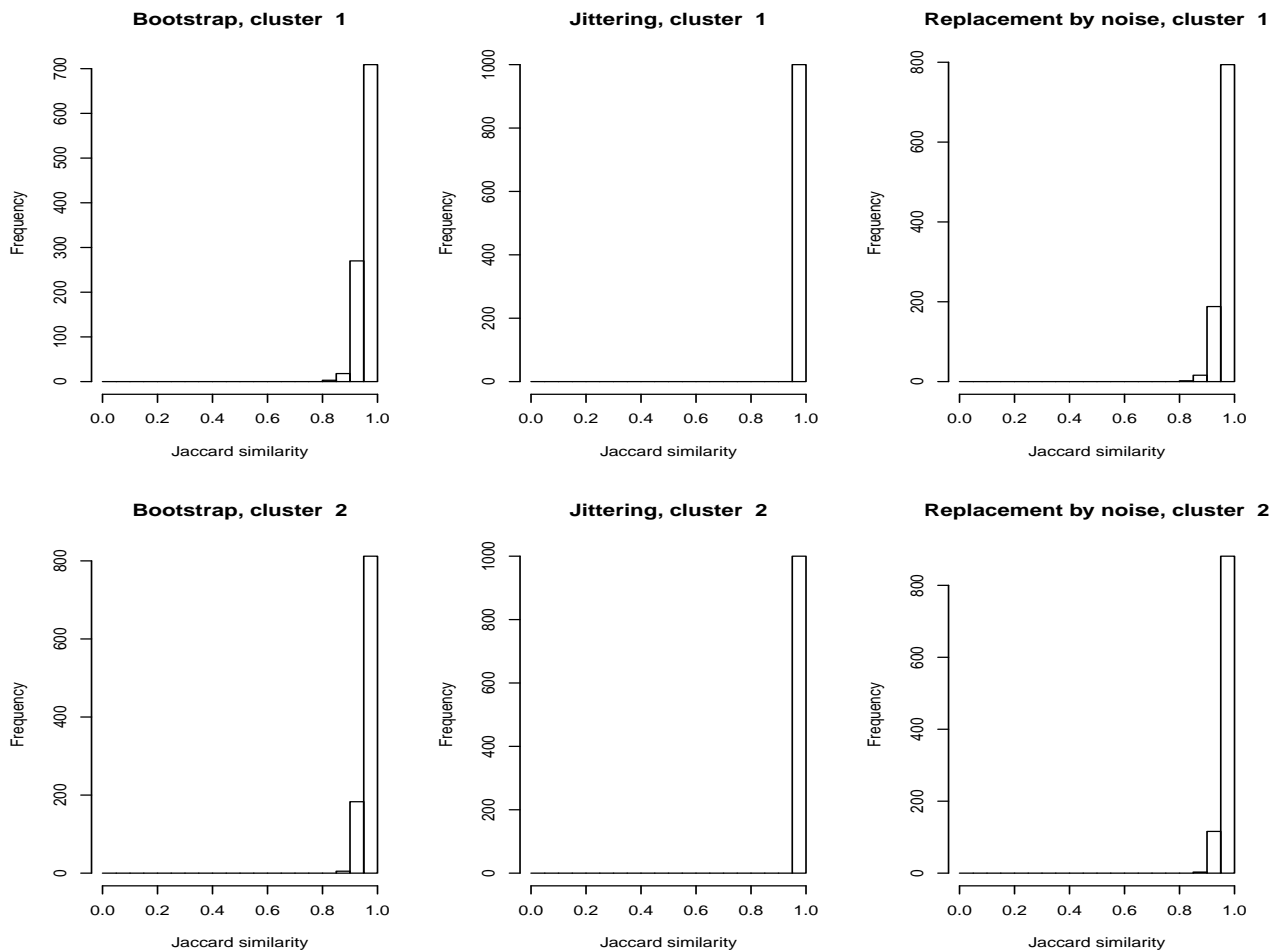

\* Cluster stability assessment \*

Cluster method: kmeans

Full clustering results are given as parameter result of the clusterboot object, which also provides further statistics of the resampling results.

Number of resampling runs: 1000

Number of clusters found in data: 2

Clusterwise Jaccard bootstrap mean:

[1] 0.9632207 0.9702989

dissolved:

[1] 0 0

recovered:

[1] 1000 1000

Clusterwise Jaccard jittering mean:

[1] 1 1

dissolved:

[1] 0 0

recovered:

```

[1] 1000 1000
Clusterwise Jaccard replacement by noise mean:
[1] 0.9684621 0.9744983
dissolved:
[1] 0 0
recovered:
[1] 1000 1000

```

*Removing one sample*

```

Min. 1st Qu. Median Mean 3rd Qu. Max.
1 1 1 1 1 1

```

*Removing one gene*

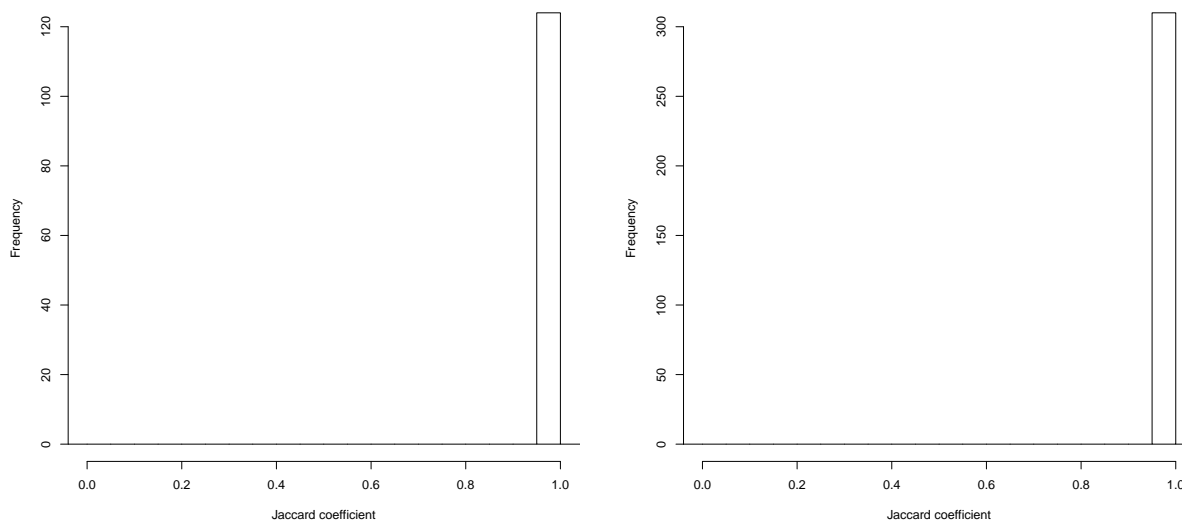

Figure 53: Removing one sample (left) and one gene (right) at a time: distributions of Jaccard coefficients

```

Min. 1st Qu. Median Mean 3rd Qu. Max.
1 1 1 1 1 1

```

| APN            | AD            | ADM           | FOM            |
|----------------|---------------|---------------|----------------|
| Min. :0.1723   | Min. :20.32   | Min. :5.148   | Min. :0.2008   |
| 1st Qu.:0.1723 | 1st Qu.:20.32 | 1st Qu.:5.148 | 1st Qu.:0.6111 |
| Median :0.1723 | Median :20.32 | Median :5.148 | Median :0.8099 |
| Mean :0.1723   | Mean :20.32   | Mean :5.148   | Mean :0.7572   |
| 3rd Qu.:0.1723 | 3rd Qu.:20.32 | 3rd Qu.:5.148 | 3rd Qu.:0.9171 |
| Max. :0.1723   | Max. :20.32   | Max. :5.148   | Max. :1.0077   |

*Removing sets of k genes*

```

Min. 1st Qu. Median Mean 3rd Qu. Max.
0.8750 1.0000 1.0000 0.9999 1.0000 1.0000

```

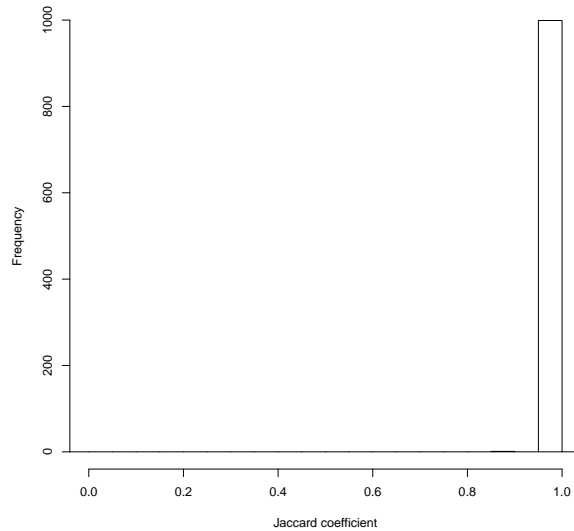

Figure 54: Removing two thirds of the genes: distribution of Jaccard coefficients

#### 7.4.6 Validation measures

Clustering Methods:

kmeans

Cluster sizes:

2 3 4 5 6

Validation Measures:

|        |              | 2       | 3       | 4       | 5       | 6       |
|--------|--------------|---------|---------|---------|---------|---------|
| kmeans | APN          | 0.0000  | 0.0019  | 0.0016  | 0.0065  | 0.0054  |
|        | AD           | 18.8528 | 17.6381 | 16.9014 | 16.4625 | 16.0267 |
|        | ADM          | 0.0000  | 0.0433  | 0.0312  | 0.0979  | 0.0851  |
|        | FOM          | 0.7572  | 0.7133  | 0.6855  | 0.6715  | 0.6614  |
|        | Connectivity | 0.0000  | 16.6972 | 45.2095 | 55.7548 | 61.4861 |
|        | Dunn         | 0.5753  | 0.4334  | 0.5102  | 0.5065  | 0.5062  |
|        | Silhouette   | 0.3458  | 0.2590  | 0.1643  | 0.1208  | 0.1130  |

Optimal Scores:

|              | Score   | Method | Clusters |
|--------------|---------|--------|----------|
| APN          | 0.0000  | kmeans | 2        |
| AD           | 16.0267 | kmeans | 6        |
| ADM          | 0.0000  | kmeans | 2        |
| FOM          | 0.6614  | kmeans | 6        |
| Connectivity | 0.0000  | kmeans | 2        |
| Dunn         | 0.5753  | kmeans | 2        |
| Silhouette   | 0.3458  | kmeans | 2        |

## 8 Ma et al. (2004) dataset (GDS807)

### 8.1 LAS bicluster

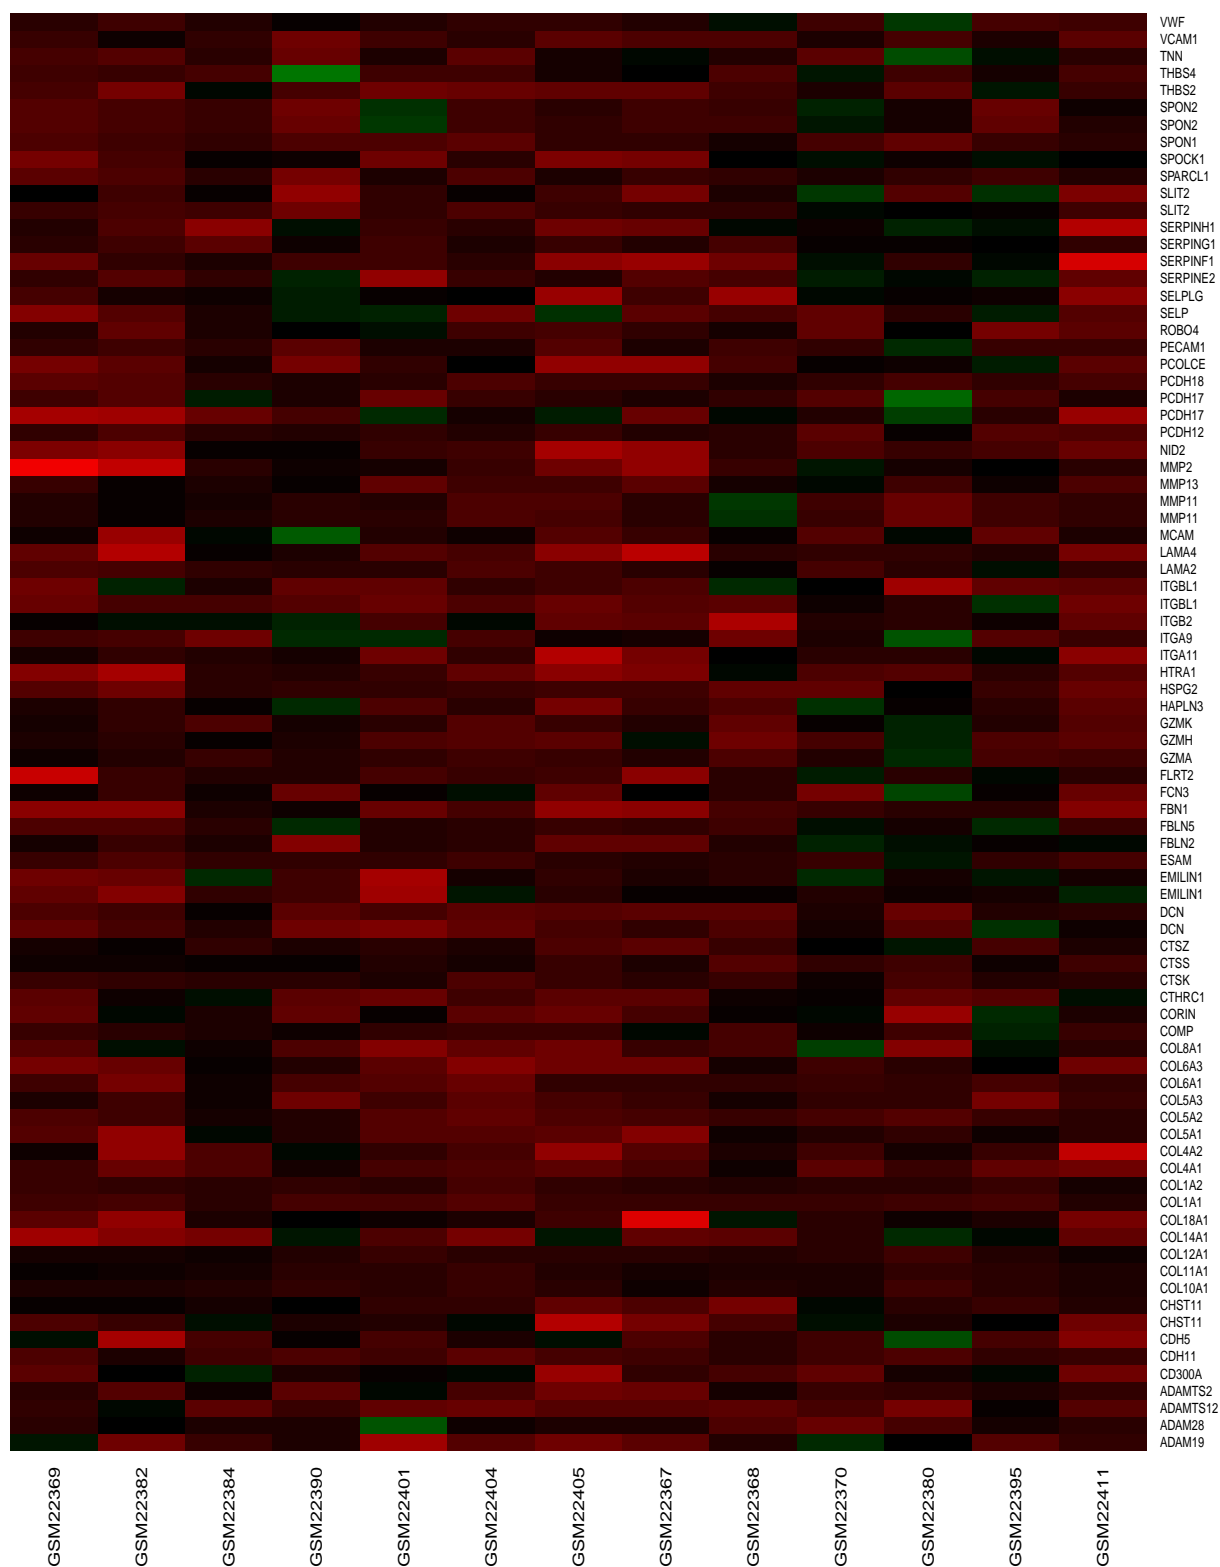

Figure 55: Heatmap of the LAS bicluster

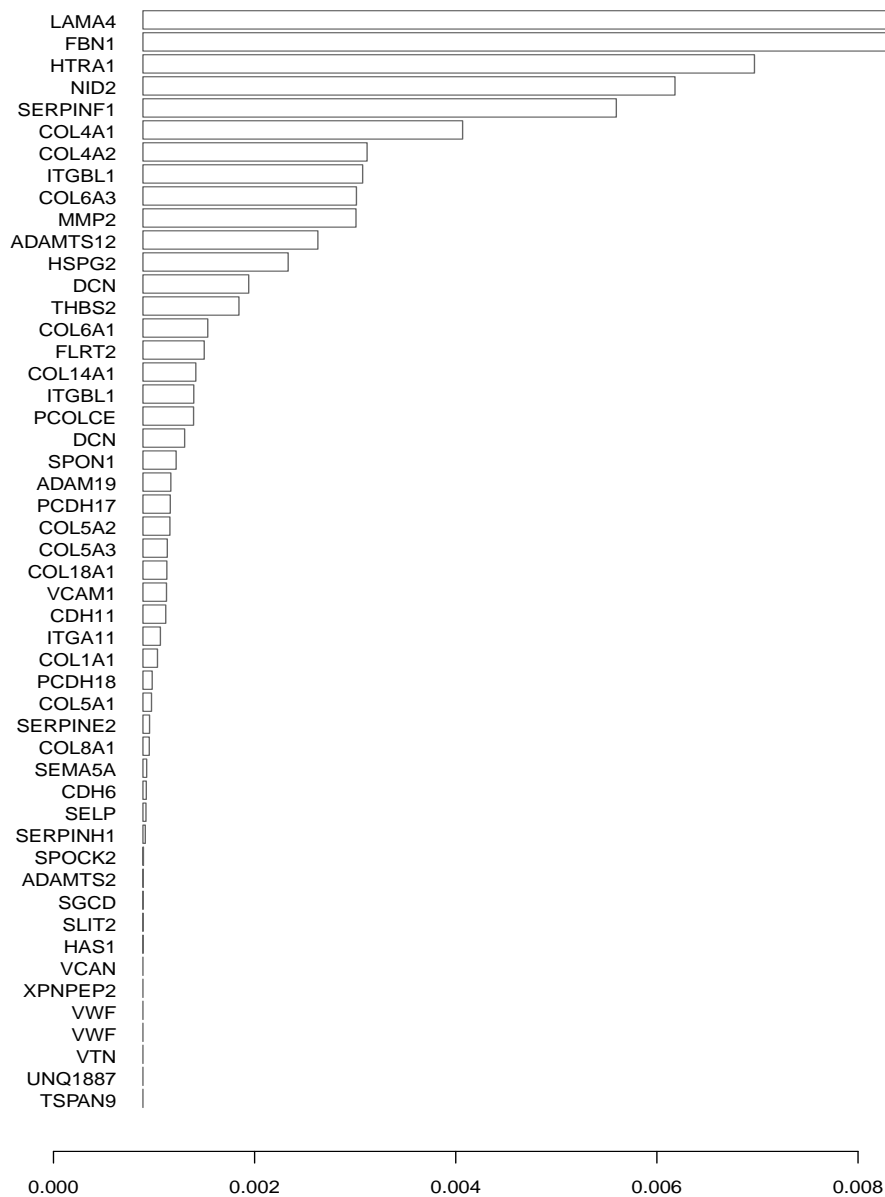

Figure 56: Most informative genes for the LAS bicluster

Number of informative genes of the LAS bicluster that also belong to the ECM3 consensus list: 20 of 34 (59%)

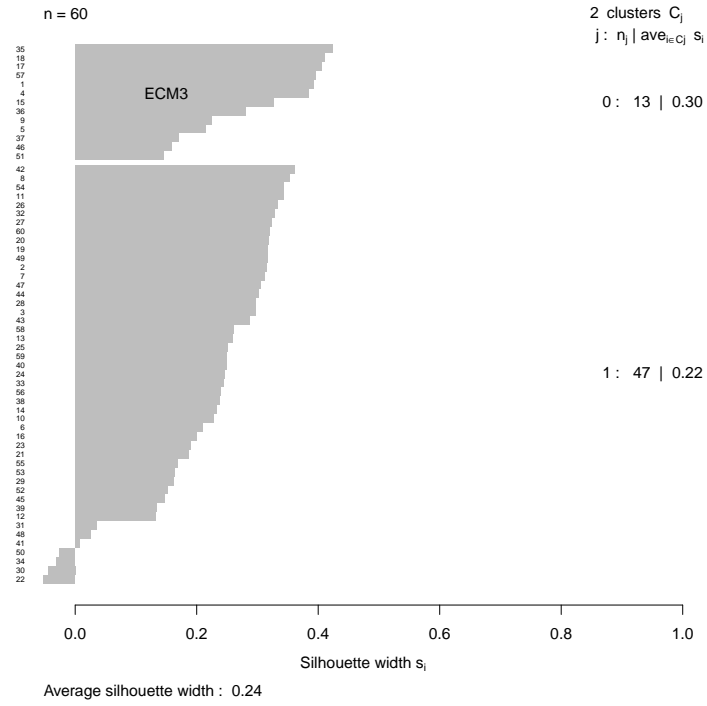

Figure 57: Silhouette plot for the LAS bicluster

| Connectivity | Dunn Index |
|--------------|------------|
| 12.97        | 0.39       |

Table 43: Connectivity validation measure and Dunn Index of LAS partitioning

## 8.2 IRCC-KM bicluster

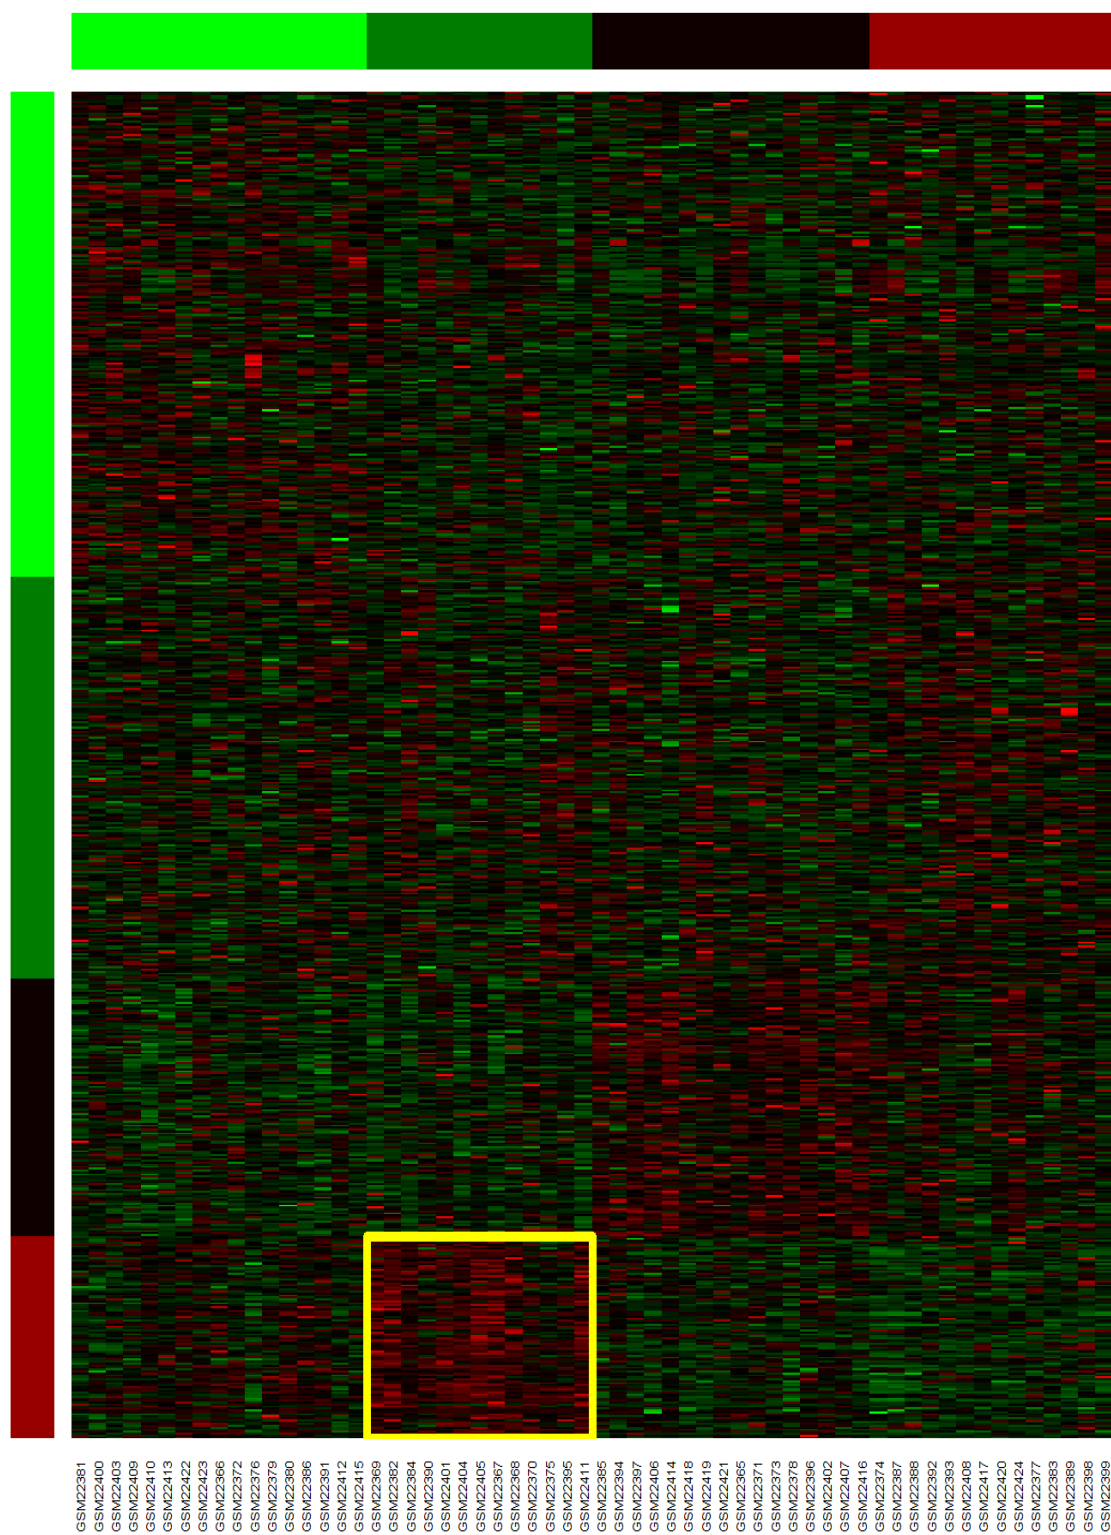

Figure 58: Heatmap of the IRCC-KM bicluster

*IRCC-KM genes*

|          |          |          |         |          |          |
|----------|----------|----------|---------|----------|----------|
| ADAM19   | ADAMTS1  | ADAMTS12 | ADAMTS2 | ADAMTS6  | CD300A   |
| CD36     | CD36     | CDH11    | CDH6    | CHST11   | CHST11   |
| CHST2    | COL10A1  | COL11A1  | COL12A1 | COL14A1  | COL15A1  |
| COL18A1  | COL1A1   | COL1A2   | COL4A1  | COL4A2   | COL5A1   |
| COL5A2   | COL5A3   | COL6A1   | COL6A3  | COL8A1   | COMP     |
| CORIN    | CPE      | CTHRC1   | CTSK    | CTSS     | CTSZ     |
| DCN      | DCN      | EMILIN1  | EMILIN1 | ESAM     | FBLN2    |
| FBLN5    | FBN1     | FLRT2    | GZMA    | GZMH     | GZMK     |
| HAPLN3   | HSPG2    | HTRA1    | ITGA11  | ITGA5    | ITGA7    |
| ITGA8    | ITGB2    | ITGBL1   | ITGBL1  | LAMA2    | LAMA4    |
| MCAM     | MME      | MMP1     | MMP11   | MMP11    | MMP13    |
| MMP2     | MMP3     | NID2     | PCDH12  | PCDH17   | PCDH17   |
| PCDH18   | PCDH7    | PCOLCE   | PCOLCE2 | PLXNB3   | ROBO4    |
| SELE     | SELP     | SELPLG   | SEMA4A  | SERPINE2 | SERPINF1 |
| SERPING1 | SERPINH1 | SGCD     | SLIT2   | SLIT2    | SPARC    |
| SPARCL1  | SPOCK1   | SPOCK2   | SPON1   | SPON2    | SPON2    |
| THBS2    | THBS4    | TIMP3    | TNN     | TSPAN7   | VCAM1    |
| VWF      | VCAN     |          |         |          |          |

*IRCC-KM samples*

|          |          |          |          |          |          |
|----------|----------|----------|----------|----------|----------|
| GSM22369 | GSM22382 | GSM22384 | GSM22390 | GSM22401 | GSM22404 |
| GSM22405 | GSM22367 | GSM22368 | GSM22370 | GSM22375 | GSM22395 |
| GSM22411 |          |          |          |          |          |

**8.2.1 Comparing LAS and IRCC-KM biclusters**

|                    | No ECM | ECM3 |
|--------------------|--------|------|
| No ECM3            | 582    | 5    |
| ECM3               | 25     | 79   |
| Jaccard similarity | 0.72   |      |

Table 44: Comparing gene lists: LAS (column) vs. IRCC-KM bicluster (row)

|                    | No ECM | ECM3 |
|--------------------|--------|------|
| No ECM3            | 46     | 1    |
| ECM3               | 1      | 12   |
| Jaccard similarity | 0.86   |      |

Table 45: Comparing sample lists: LAS (column) vs. IRCC-KM bicluster (row)



### 8.3 IRCC-HC bicluster

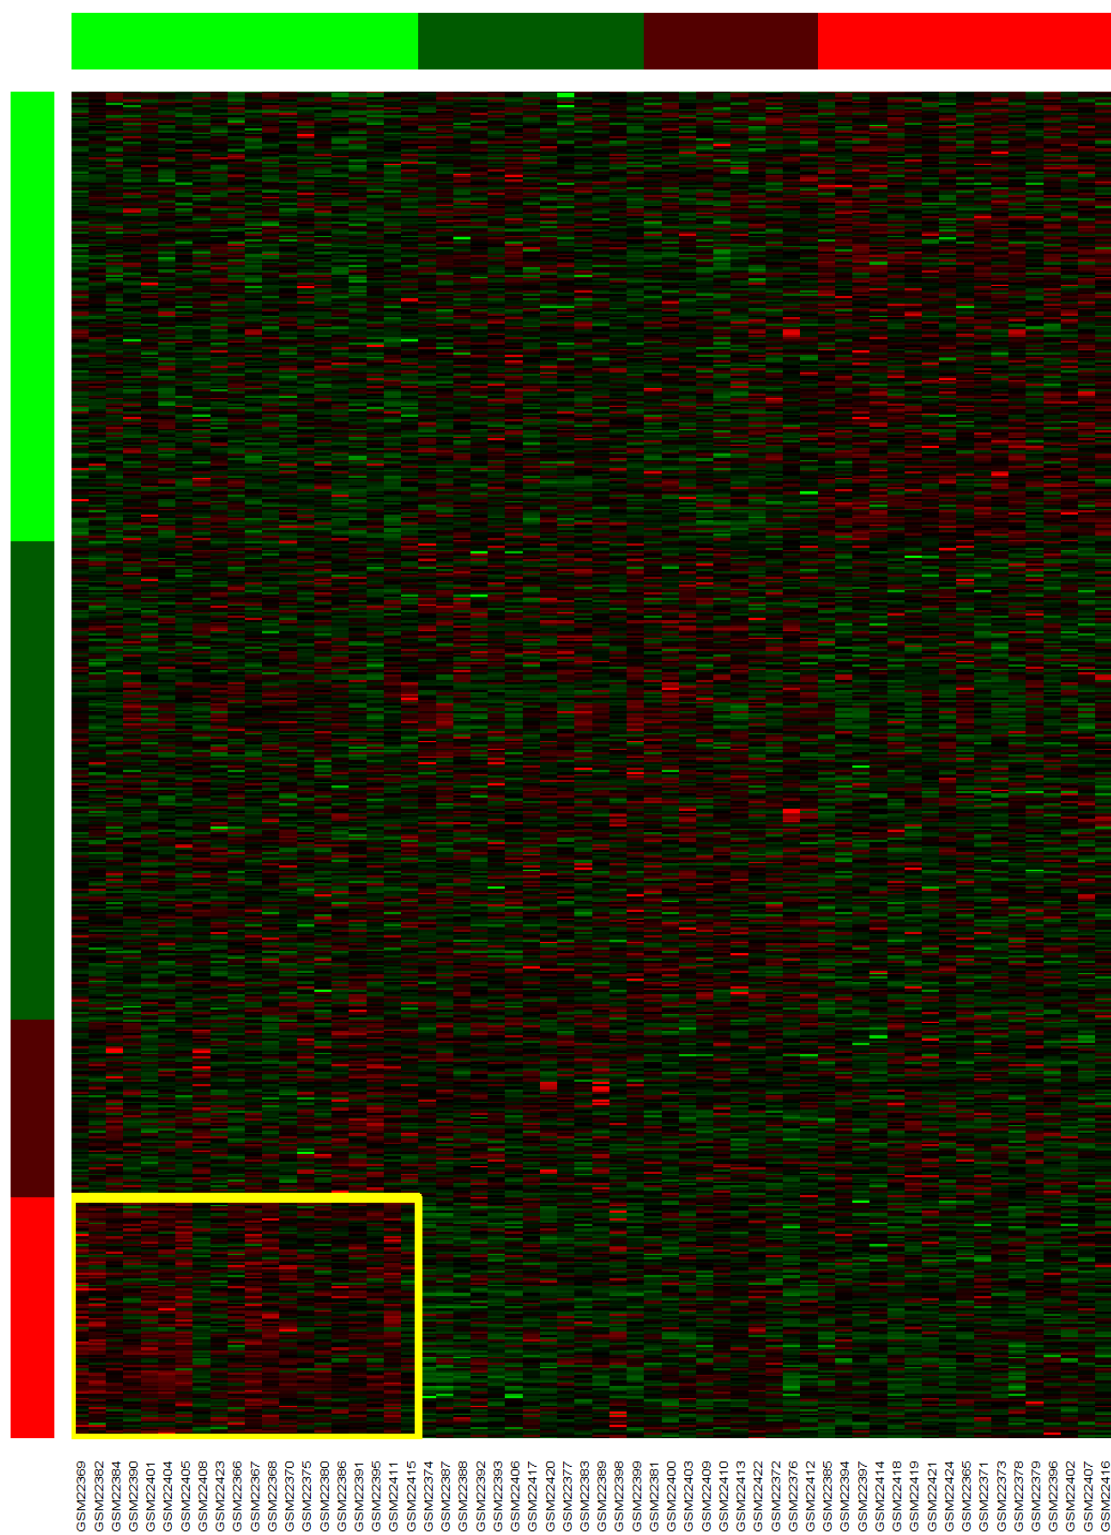

Figure 59: Heatmap of the IRCC-HC bicluster

*IRCC-HC genes*

|          |          |          |          |          |          |
|----------|----------|----------|----------|----------|----------|
| ADAM19   | ADAMDEC1 | ADAMTS1  | ADAMTS12 | ADAMTS2  | ADAMTS4  |
| ADAMTSL1 | ADIPOQ   | CD300A   | CD36     | CD36     | CD6      |
| CDH11    | CDH17    | CDH26    | CDH5     | CHL1     | CHST11   |
| CHST11   | CHST2    | CNTN1    | COL10A1  | COL11A1  | COL14A1  |
| COL18A1  | COL1A1   | COL1A2   | COL4A1   | COL4A2   | COL5A1   |
| COL5A2   | COL5A3   | COL6A1   | COL6A3   | COL8A1   | COL9A2   |
| COMP     | CTHRC1   | CTSC     | CTSH     | CTSH     | CTSK     |
| CTSZ     | DCN      | DCN      | EMILIN1  | EMILIN1  | ESAM     |
| FBN1     | FLRT2    | GPC6     | GZMA     | GZMH     | GZMK     |
| HAPLN3   | HAS1     | HAS2     | HSPG2    | HTRA1    | ICAM2    |
| ITGA11   | ITGA7    | ITGA8    | ITGB2    | ITGBL1   | ITGBL1   |
| KLK15    | LAMA2    | LAMA4    | MARCO    | MATN3    | MCAM     |
| MMP1     | MMP11    | MMP11    | MMP13    | MMP2     | MMP3     |
| MMP9     | NAALAD2  | NAALADL1 | NAPSB    | NID2     | PCDH12   |
| PCDH17   | PCDH17   | PCDH18   | PCDHB13  | PCDHB18  | PCOLCE   |
| PCOLCE2  | PECAM1   | PLXDC1   | RNPEP    | ROBO4    | SELE     |
| SELP     | SELPLG   | SEMA4D   | SEMA7A   | SERPINE2 | SERPINF1 |
| SERPING1 | SERPINH1 | SGCD     | SIGLEC7  | SLIT2    | SLIT2    |
| SPARC    | SPARCL1  | SPG21    | SPOCK1   | SPOCK2   | SPON1    |
| SPON2    | SPON2    | STAG3    | THBS2    | THBS4    | TSPAN32  |
| VCAM1    | VCAN     | VWF      | XPNPEP2  |          |          |

*IRCC-HC samples*

|          |          |          |          |          |          |
|----------|----------|----------|----------|----------|----------|
| GSM22369 | GSM22382 | GSM22384 | GSM22390 | GSM22401 | GSM22404 |
| GSM22405 | GSM22408 | GSM22423 | GSM22366 | GSM22367 | GSM22368 |
| GSM22370 | GSM22375 | GSM22380 | GSM22386 | GSM22391 | GSM22395 |
| GSM22411 | GSM22415 |          |          |          |          |

### 8.3.1 Comparing LAS and IRCC-HC biclusters

|                    | No ECM | ECM3 |
|--------------------|--------|------|
| No ECM3            | 558    | 9    |
| ECM3               | 49     | 75   |
| Jaccard similarity | 0.56   |      |

Table 46: Comparing gene lists: LAS (column) vs. IRCC-HC bicluster (row)

|                    | No ECM | ECM3 |
|--------------------|--------|------|
| No ECM3            | 40     | 0    |
| ECM3               | 7      | 13   |
| Jaccard similarity | 0.65   |      |

Table 47: Comparing sample lists: LAS (column) vs. IRCC-HC bicluster (row)

## 8.4 CCSS bicluster

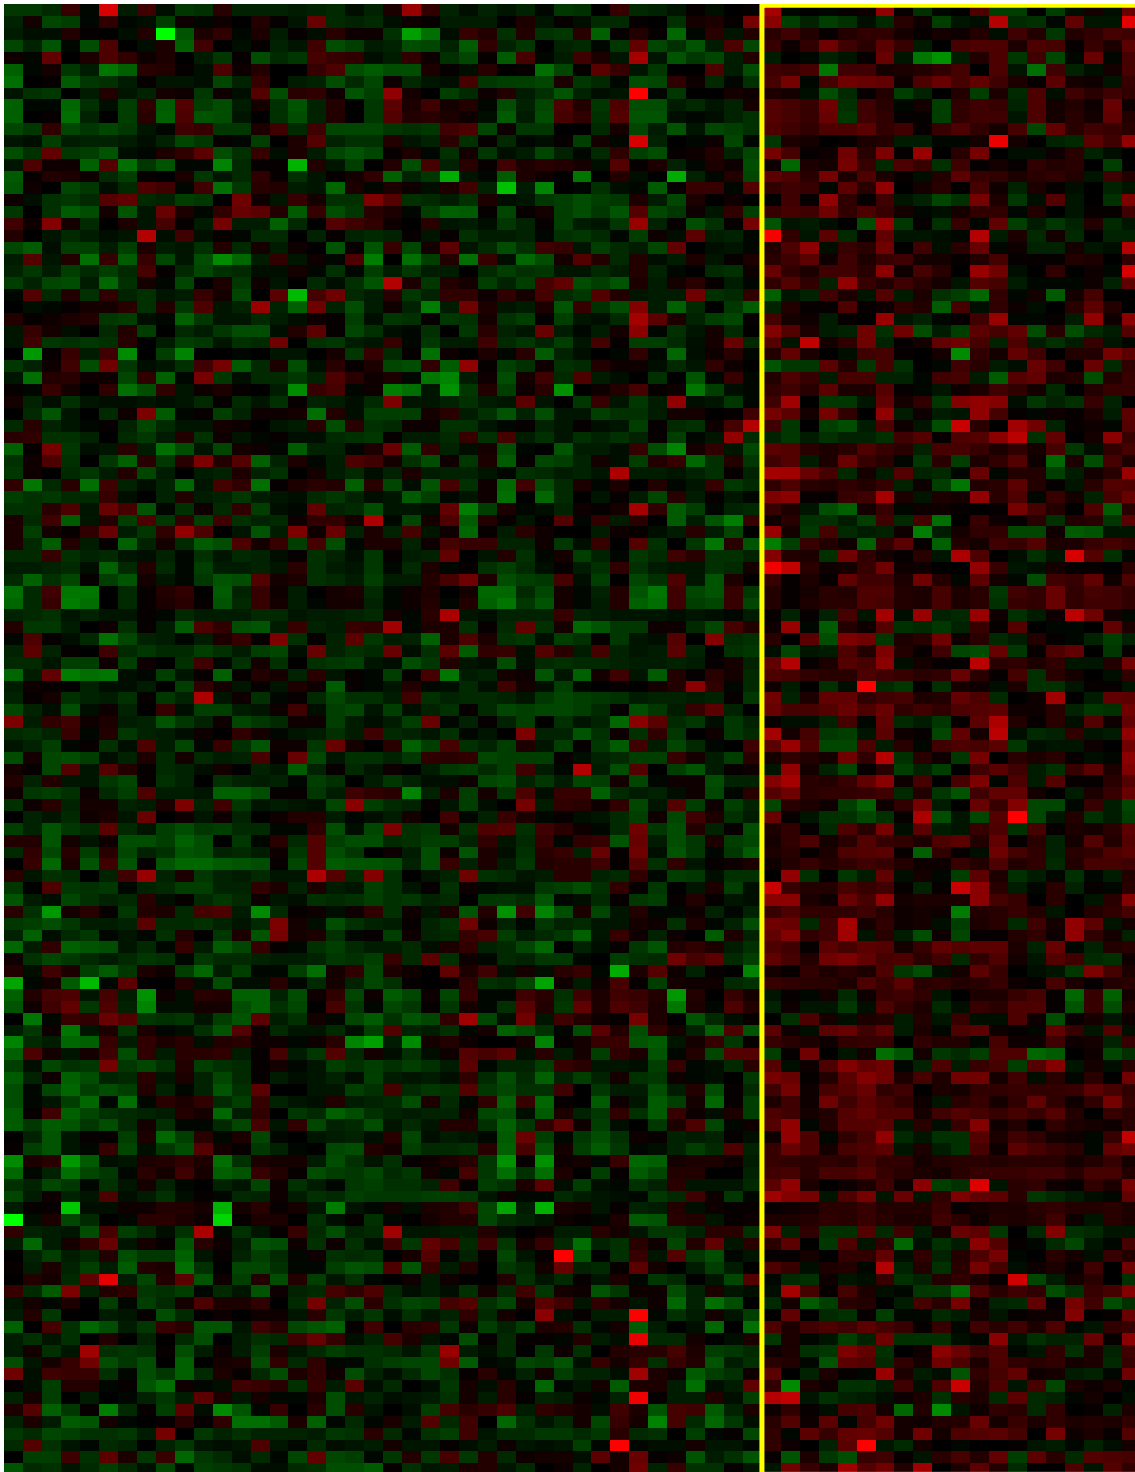

Figure 60: Heatmap of the CCSS bicluster

### 8.4.1 Comparing LAS and CCSS biclusters

|                    | No ECM | ECM3 |
|--------------------|--------|------|
| No ECM3            | 40     | 0    |
| ECM3               | 7      | 13   |
| Jaccard similarity | 0.65   |      |

Table 48: Comparing sample lists: LAS (column) vs. CCSS (row) biclusters

### 8.4.2 Prediction strength for CCSS

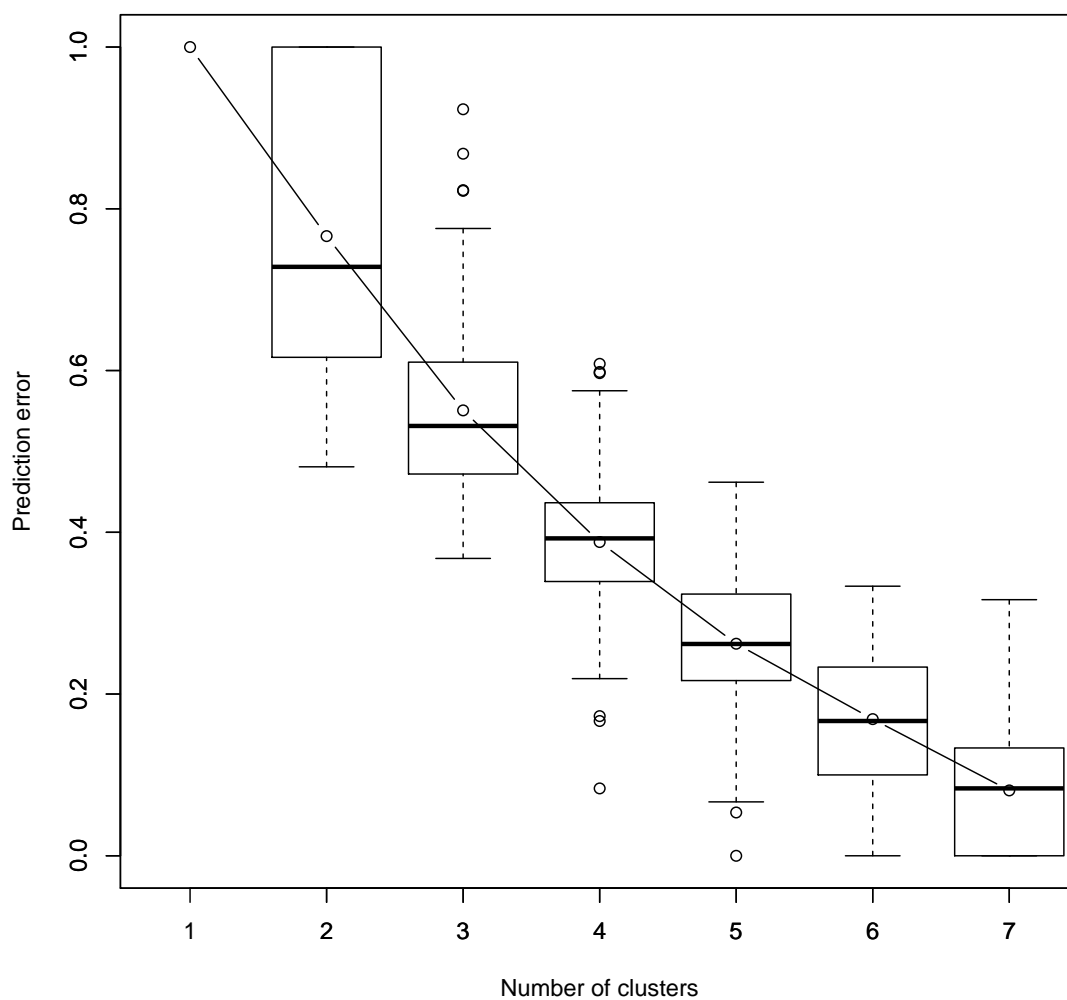

### 8.4.3 Consensus clustering

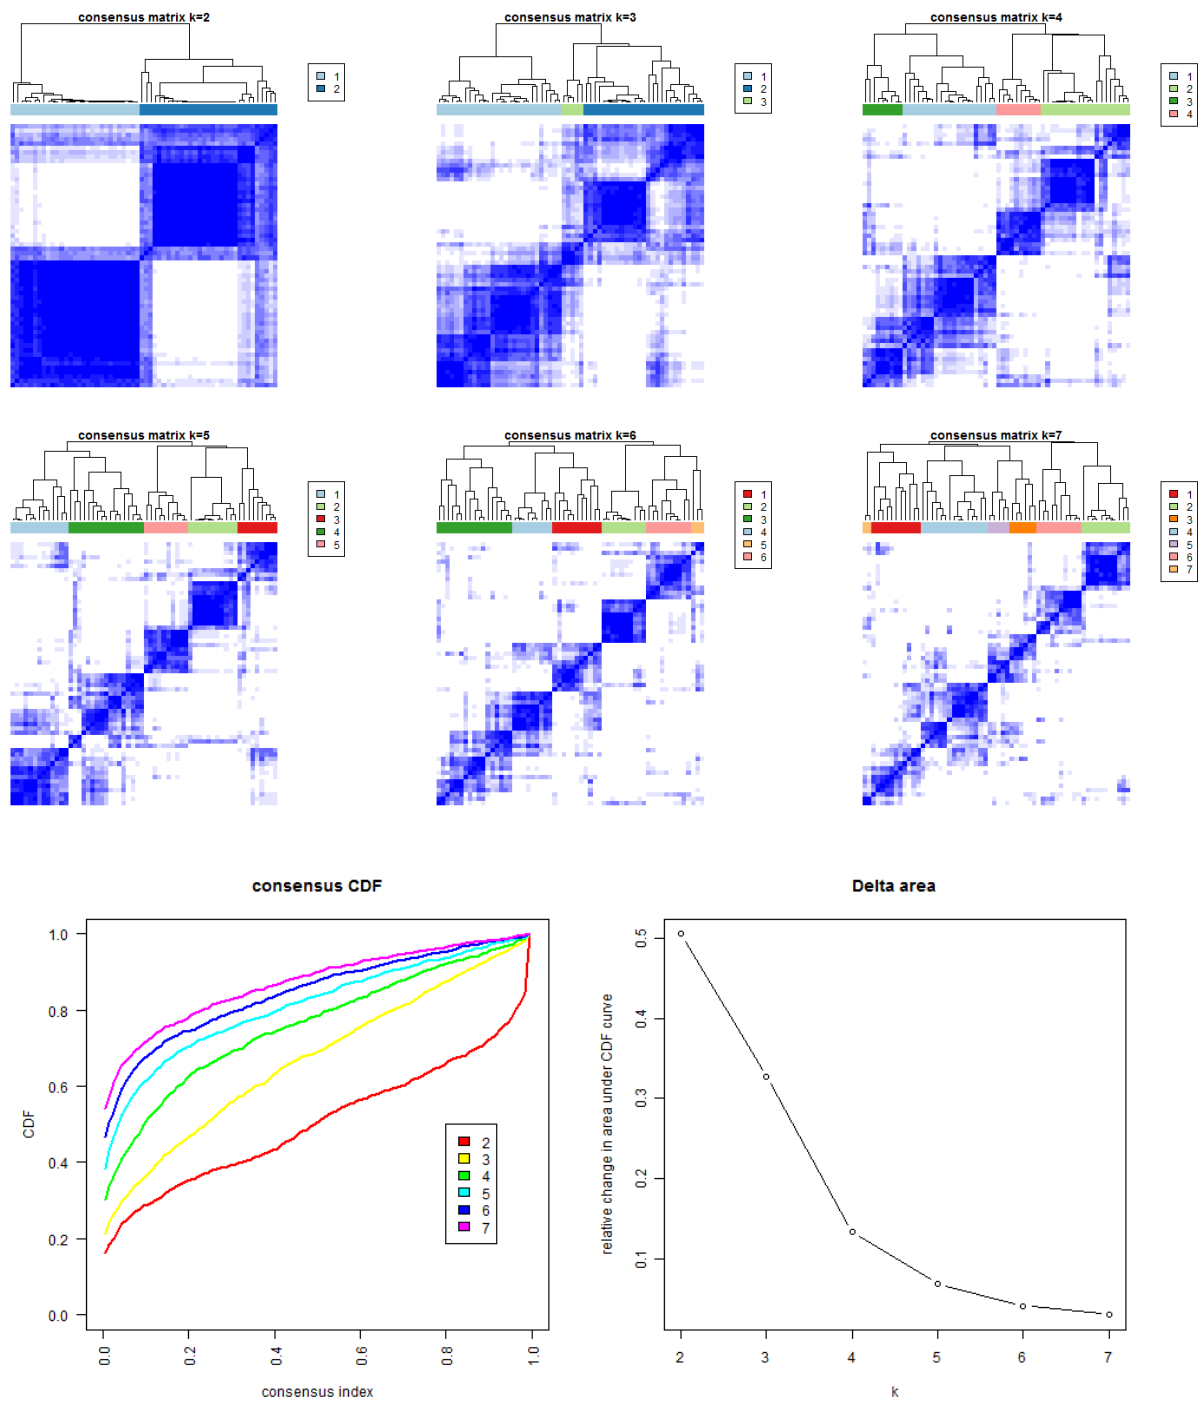

Figure 61: Statistical significance of CCSS clustering (Consensus clustering )

## 8.4.4 Statistical significance

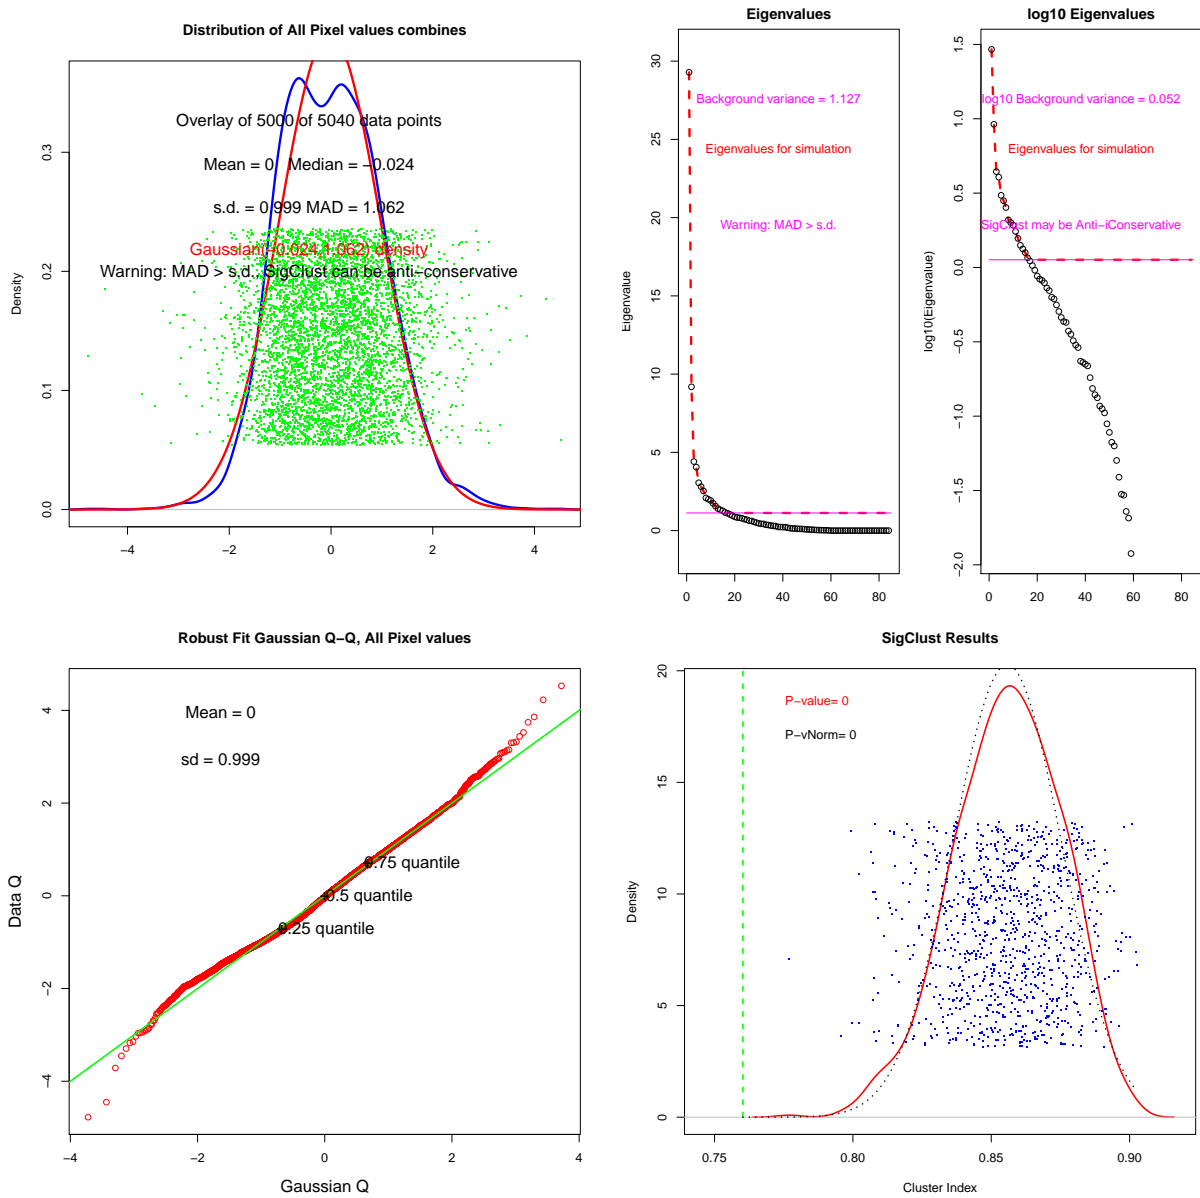

| P-value | P-vNorm |
|---------|---------|
| 0.0E+00 | 6.1E-07 |

Table 49: SigClust p-values

## 8.4.5 Cluster-wise assessment of cluster stability

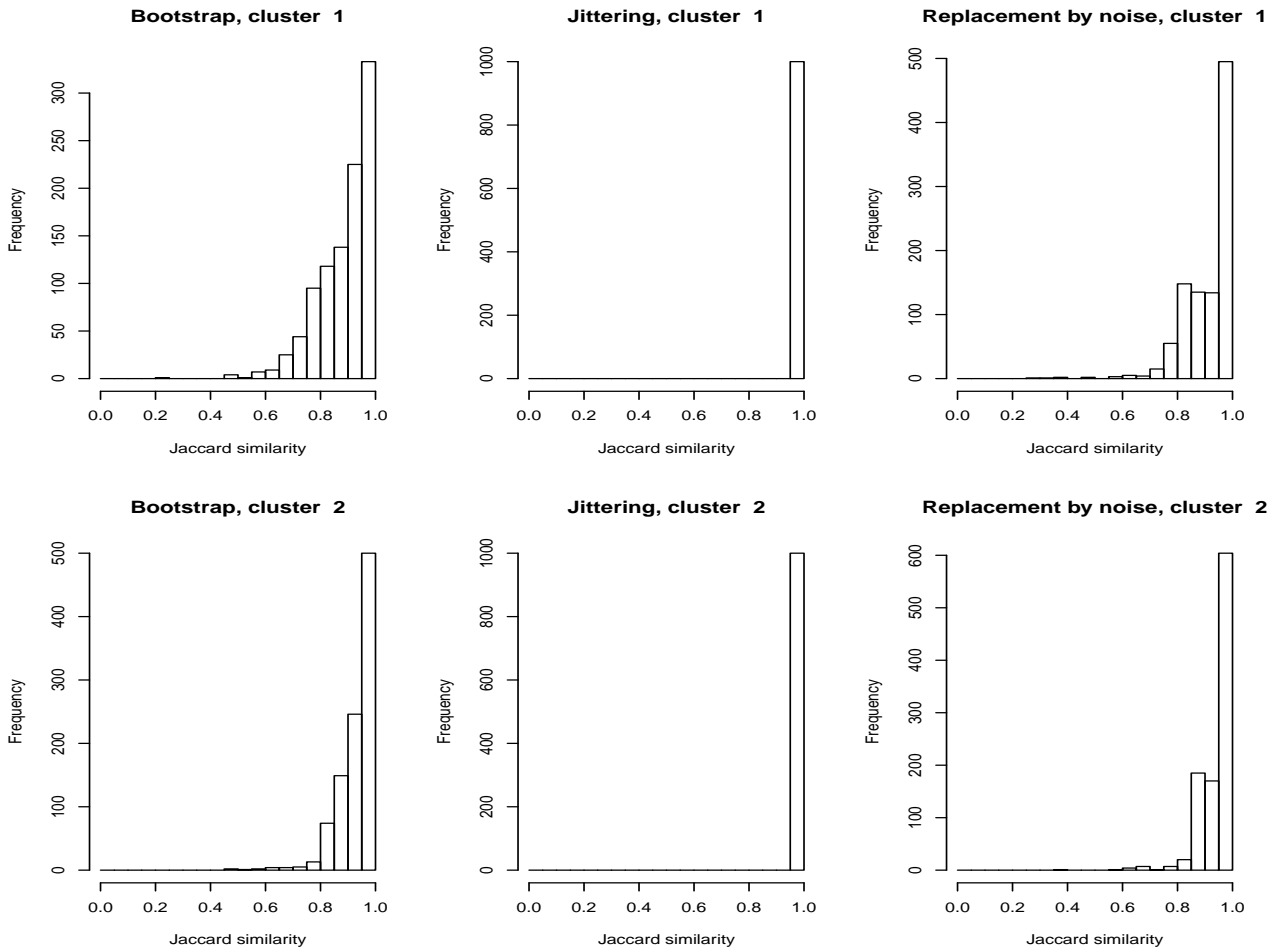

\* Cluster stability assessment \*

Cluster method: kmeans

Full clustering results are given as parameter result of the clusterboot object, which also provides further statistics of the resampling results.

Number of resampling runs: 1000

Number of clusters found in data: 2

Clusterwise Jaccard bootstrap mean:

[1] 0.8940155 0.9342179

dissolved:

[1] 5 2

recovered:

[1] 909 982

Clusterwise Jaccard jittering mean:

[1] 0.9997000 0.9998364

dissolved:

[1] 0 0

recovered:



```

[1] 1000 1000
Clusterwise Jaccard replacement by noise mean:
[1] 0.9112561 0.9445279
dissolved:
[1] 6 1
recovered:
[1] 967 986

```

*Removing one sample*

```

Min. 1st Qu. Median Mean 3rd Qu. Max.
0.3220 0.3220 0.3390 0.3333 0.3390 0.3390

```

*Removing one gene*

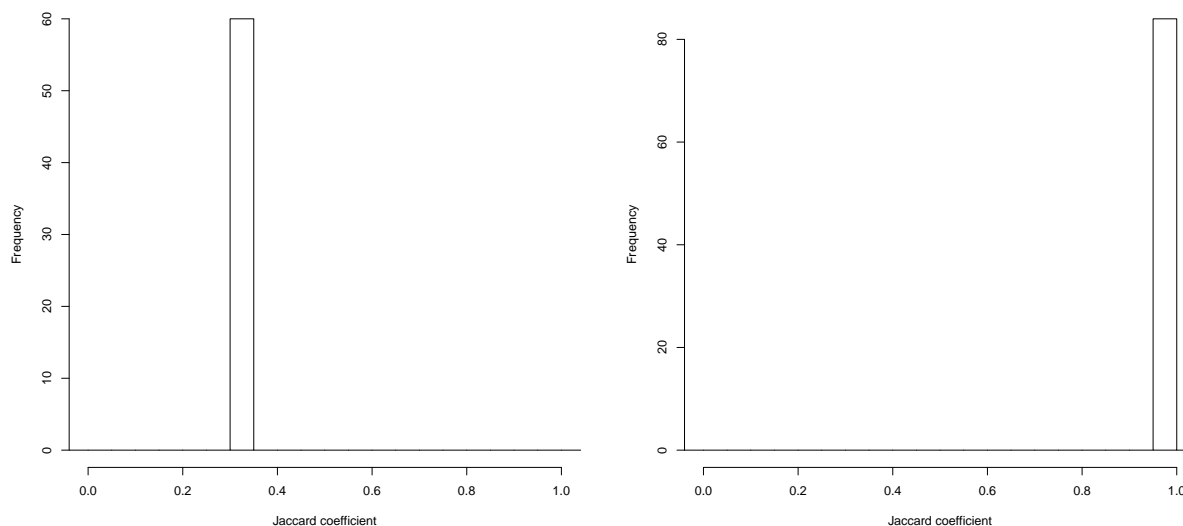

Figure 62: Removing one sample (left) and one gene (right) at a time: distributions of Jaccard coefficients

```

Min. 1st Qu. Median Mean 3rd Qu. Max.
1 1 1 1 1 1

```

| APN            | AD            | ADM          | FOM            |
|----------------|---------------|--------------|----------------|
| Min. :0.1986   | Min. :11.39   | Min. :2.22   | Min. :0.6757   |
| 1st Qu.:0.1986 | 1st Qu.:11.39 | 1st Qu.:2.22 | 1st Qu.:0.8271 |
| Median :0.1986 | Median :11.39 | Median :2.22 | Median :0.8893 |
| Mean :0.1986   | Mean :11.39   | Mean :2.22   | Mean :0.8765   |
| 3rd Qu.:0.1986 | 3rd Qu.:11.39 | 3rd Qu.:2.22 | 3rd Qu.:0.9376 |
| Max. :0.1986   | Max. :11.39   | Max. :2.22   | Max. :1.0003   |

*Removing sets of k genes*

```

Min. 1st Qu. Median Mean 3rd Qu. Max.
0.3824 0.6000 0.6500 0.6647 0.7500 1.0000

```

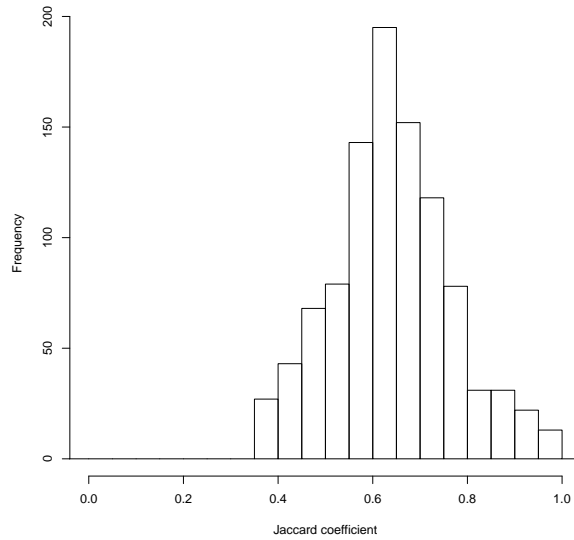

Figure 63: Removing two thirds of the genes: distribution of Jaccard coefficients

#### 8.4.6 Validation measures

Clustering Methods:

kmeans

Cluster sizes:

2 3 4 5 6

Validation Measures:

|        |              | 2       | 3       | 4       | 5       | 6       |
|--------|--------------|---------|---------|---------|---------|---------|
| kmeans | APN          | 0.0000  | 0.0148  | 0.1365  | 0.3117  | 0.2067  |
|        | AD           | 0.9662  | 0.8833  | 0.8672  | 0.8641  | 0.8125  |
|        | ADM          | 0.0000  | 0.1591  | 1.2190  | 2.4579  | 1.6711  |
|        | FOM          | 0.8765  | 0.8270  | 0.8155  | 0.7987  | 0.7874  |
|        | Connectivity | 56.7460 | 69.4218 | 86.0329 | 80.4929 | 94.1976 |
|        | Dunn         | 0.3129  | 0.3448  | 0.3436  | 0.3651  | 0.3436  |
|        | Silhouette   | 0.0302  | 0.0689  | 0.0478  | 0.0589  | 0.0533  |

Optimal Scores:

|              | Score   | Method | Clusters |
|--------------|---------|--------|----------|
| APN          | 0.0000  | kmeans | 2        |
| AD           | 0.8125  | kmeans | 6        |
| ADM          | 0.0000  | kmeans | 2        |
| FOM          | 0.7874  | kmeans | 6        |
| Connectivity | 56.7460 | kmeans | 2        |
| Dunn         | 0.3651  | kmeans | 5        |
| Silhouette   | 0.0689  | kmeans | 3        |



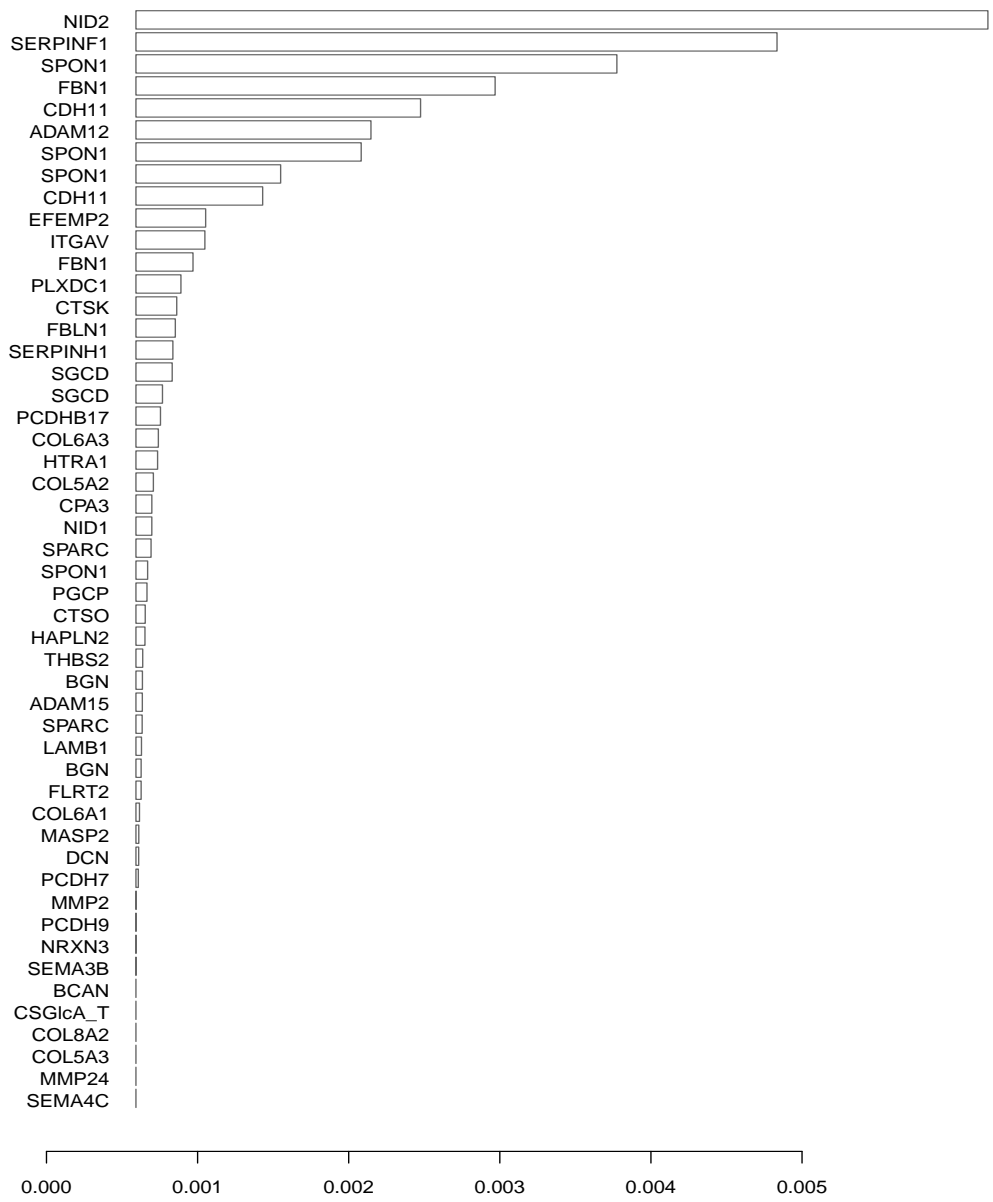

Figure 65: Most informative genes for the LAS bicluster

Number of informative genes of the LAS bicluster that also belong to the ECM3 consensus list: 32 of 34 (94%)

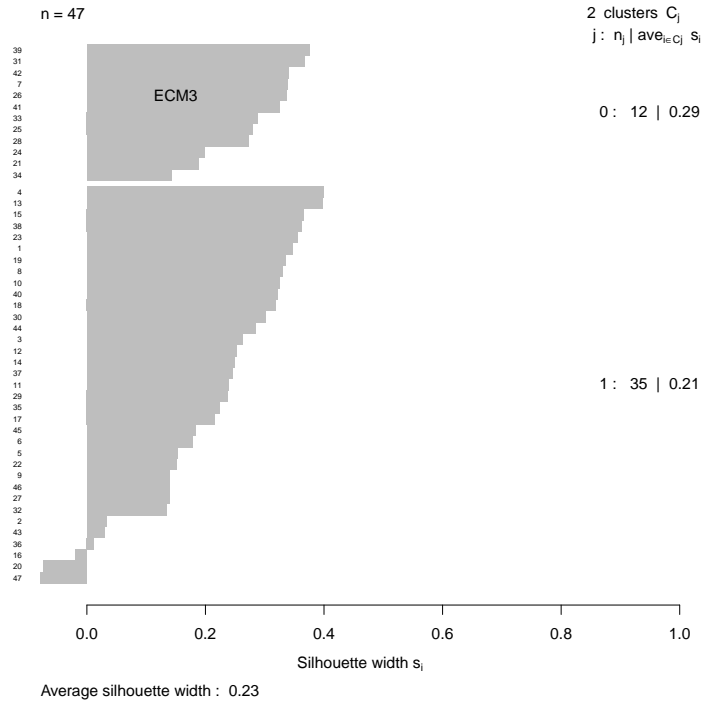

Figure 66: Silhouette plot for the LAS bicluster

| Connectivity | Dunn Index |
|--------------|------------|
| 8.98         | 0.48       |

Table 50: Connectivity validation measure and Dunn Index of LAS partitioning

## 9.2 IRCC-KM bicluster

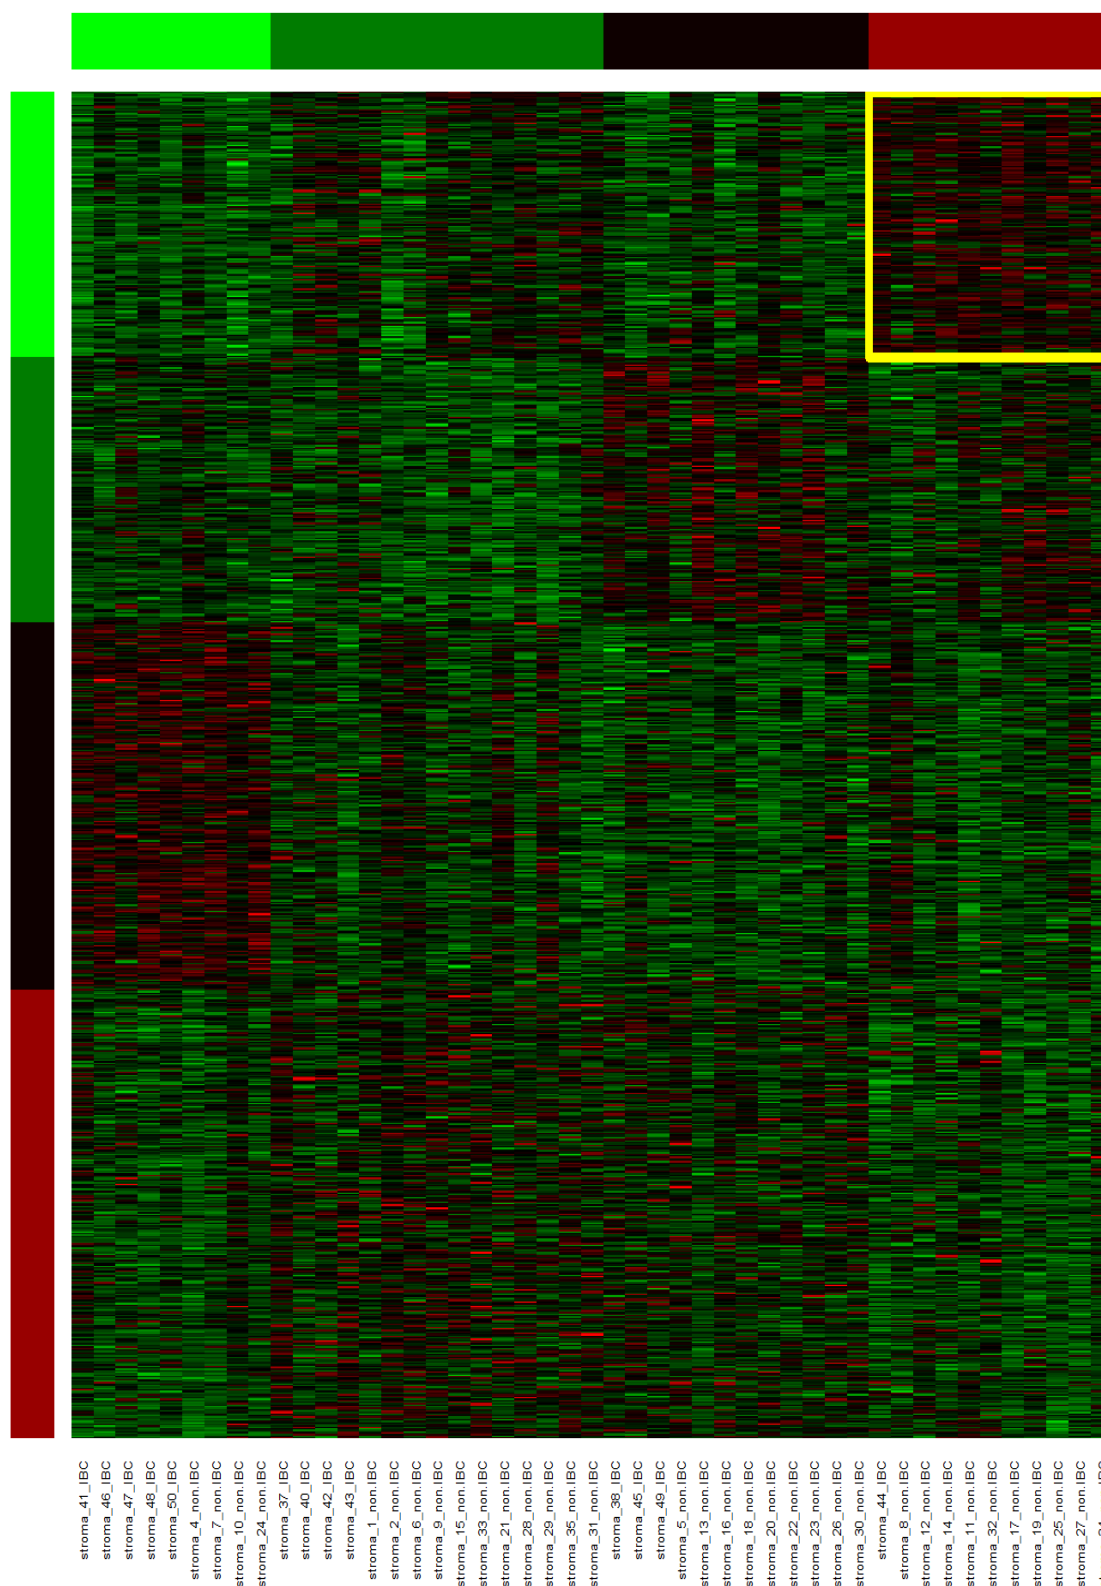

Figure 67: Heatmap of the IRCC-KM bicluster

*IRCC-KM genes*

|          |          |          |          |          |          |
|----------|----------|----------|----------|----------|----------|
| MMP14    | SPARC    | CTSD     | CTSB     | CTSB     | CD9      |
| MMP2     | BGN      | BGN      | THBS1    | THBS1    | THBS1    |
| THBS1    | ITGB5    | ITGB5    | TIMP3    | TIMP3    | TIMP3    |
| TIMP3    | HTRA1    | COL6A3   | CTSC     | LAMB1    | TNC      |
| TIMP1    | COL3A1   | DCN      | CPD      | CPD      | ALCAM    |
| ALCAM    | NID1     | NID1     | CHPF     | SERPINF1 | COL1A1   |
| COL1A1   | ITGAV    | SPOCK1   | ADAM9    | COL1A2   | COL1A2   |
| CTSK     | PRSS23   | PCOLCE   | ADAM10   | SERPINE1 | SERPINE1 |
| GPC1     | FBN1     | FBN1     | ITGB2    | MMP14    | MMP14    |
| CTSS     | CTSS     | ADAM12   | FBLN1    | THBS2    | SDF2     |
| TIMP2    | FBN2     | TSPAN31  | COL5A1   | PGCP     | CTS0     |
| SEMA3C   | SEMA3C   | MMP11    | MMP11    | MMP9     | NID2     |
| EMILIN1  | COL11A1  | MMP1     | MMP12    | ITGB3    | GPC4     |
| GPC4     | ITGAE    | SGCB     | ITGBL1   | PCDH7    | PCDH7    |
| CPA3     | COMP     | ITGAM    | MMP3     | ITGA4    | COL10A1  |
| MMP13    | MATN3    | PLXNC1   | EFEMP2   | CDH11    | CDH11    |
| SIGLEC7  | SERPINH1 | CD164    | PGCP     | CD164    | COL6A2   |
| CTS0     | DCN      | EFEMP2   | ECM1     | SPON1    | SPON1    |
| SERPINB9 | ADAM19   | CD300A   | ITGAX    | SGCD     | SGCD     |
| FN1      | COL3A1   | COL13A1  | DPP4     | FN1      | DCN      |
| NRP2     | DCN      | ITGB1    | COL6A1   | SDC2     | SDC2     |
| SDC2     | FN1      | COL5A1   | COL5A1   | SPARC    | COL6A1   |
| ROBO1    | PLXNC1   | CTSB     | CTSB     | COL6A2   | ITGA4    |
| COL6A1   | SGCD     | SERPINB1 | BGN      | SPON1    | SPON1    |
| ITGB5    | ITGB5    | PLXDC1   | ADAMTS2  | SGCD     | NRP2     |
| FN1      | FN1      | ITGBL1   | APP      | COL3A1   | ADAM12   |
| FBN2     | THBS1    | FN1      | MMP14    | COL10A1  | COL1A1   |
| SPG21    | SPON2    | CHST12   | CHST11   | PLXDC1   | CORIN    |
| KLK14    | LEPRE1   | ITFG1    | COL5A2   | COL5A2   | CSG1cA_T |
| COL8A2   | COL11A1  | COL8A2   | CSG1cA_T |          |          |

*IRCC-KM samples*

stroma\_44\_IB stroma\_8\_non stroma\_12\_no stroma\_14\_no stroma\_11\_no stroma\_32\_no  
stroma\_17\_no stroma\_19\_no stroma\_25\_no stroma\_27\_no stroma\_34\_no

### 9.2.1 Comparing LAS and IRCC-KM biclusters

|                    | No ECM | ECM3 |
|--------------------|--------|------|
| No ECM3            | 689    | 36   |
| ECM3               | 66     | 112  |
| Jaccard similarity | 0.52   |      |

Table 51: Comparing gene lists: LAS (column) vs. IRCC-KM bicluster (row)

|                    | No ECM | ECM3 |
|--------------------|--------|------|
| No ECM3            | 34     | 2    |
| ECM3               | 1      | 10   |
| Jaccard similarity | 0.77   |      |

Table 52: Comparing sample lists: LAS (column) vs. IRCC-KM bicluster (row)



### 9.3 IRCC-HC bicluster

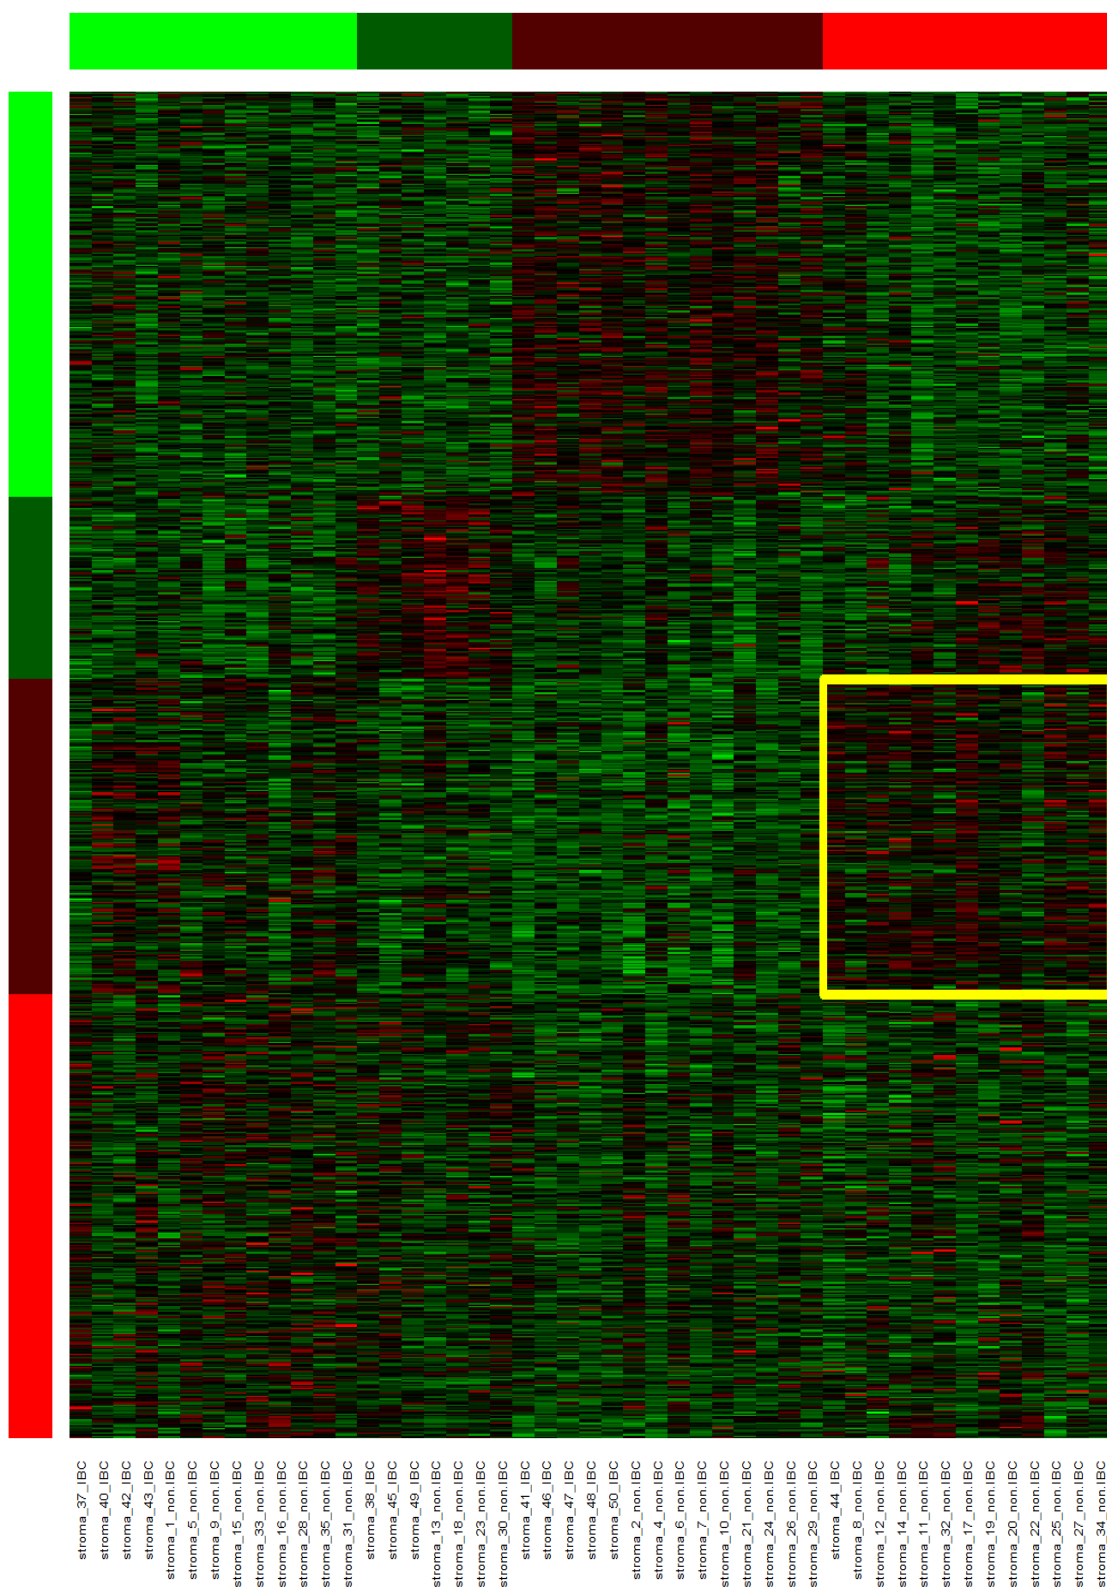

Figure 68: Heatmap of the IRCC-HC bicluster

*IRCC-HC genes*

|          |          |          |          |          |          |
|----------|----------|----------|----------|----------|----------|
| ADAM10   | ADAM10   | ADAM12   | ADAM8    | ADAM9    | ADAMDEC1 |
| ADAMTS2  | ADRM1    | BGN      | BGN      | BGN      | BST1     |
| CD164    | CD164    | CD164    | CD300A   | CD300A   | CD44     |
| CD44     | CD44     | CD44     | CD44     | CD44     | CD44     |
| CDH11    | CDH11    | CHPF     | CHST11   | CHST7    | COL10A1  |
| COL10A1  | COL11A1  | COL11A1  | COL1A1   | COL1A1   | COL1A1   |
| COL1A2   | COL1A2   | COL3A1   | COL3A1   | COL3A1   | COL4A3BP |
| COL5A1   | COL5A1   | COL5A1   | COL5A2   | COL5A2   | COL6A1   |
| COL6A1   | COL6A1   | COL6A2   | COL6A2   | COL6A3   | COL7A1   |
| COL8A1   | COL8A2   | COL8A2   | COMP     | CORIN    | CPA3     |
| CPD      | CPM      | CSG1cA_T | CSG1cA_T | CTSB     | CTSB     |
| CTSB     | CTSB     | CTSC     | CTSD     | CTSF     | CTSH     |
| CTSK     | CTSS     | CTSS     | CTSZ     | DCN      | DCN      |
| DCN      | DCN      | DPP4     | DPP4     | DPP4     | ECM1     |
| EFEMP2   | EFEMP2   | EMILIN1  | FBLN1    | FBLN1    | FBN1     |
| FBN1     | FCN1     | FN1      | FN1      | FN1      | FN1      |
| FN1      | FN1      | GPC4     | GPC4     | HTRA1    | ITGA3    |
| ITGA5    | ITGAE    | ITGAL    | ITGAM    | ITGAV    | ITGAX    |
| ITGB1    | ITGB1BP1 | ITGB2    | ITGB3    | ITGB3    | ITGB5    |
| ITGB5    | ITGB5    | ITGB5    | ITGB7    | ITGBL1   | ITGBL1   |
| LAMA4    | LAMB1    | LAMB1    | LAMB2    | LEPRE1   | MATN3    |
| MME      | MME      | MMP1     | MMP11    | MMP12    | MMP13    |
| MMP14    | MMP14    | MMP14    | MMP19    | MMP19    | MMP2     |
| MMP9     | NID1     | NID1     | NID2     | NRP1     | NRP2     |
| NRP2     | PCDH7    | PCDH7    | PCOLCE   | PGCP     | PGCP     |
| PLXDC1   | PLXDC1   | PLXNA1   | PLXNA2   | PLXNB2   | PLXNC1   |
| PLXNC1   | PLXNC1   | PLXND1   | PLXND1   | PREP     | PREP     |
| PRG2     | PRSS23   | PSMC4    | SDC2     | SDC2     | SDC2     |
| SELPLG   | SEMA3C   | SERPINB1 | SERPINB1 | SERPINE1 | SERPINE1 |
| SERPINF1 | SERPINH1 | SGCD     | SGCD     | SGCD     | SGCD     |
| SIGLEC7  | SPARC    | SPARC    | SPOCK1   | SPON1    | SPON1    |
| SPON1    | SPON1    | SPON2    | TGM2     | THBS1    | THBS1    |
| THBS1    | THBS1    | THBS1    | THBS2    | THBS3    | TIMP1    |
| TIMP2    | TIMP3    | TIMP3    | TIMP3    | TIMP3    | TSPAN2   |
| TSPAN3   | TSPAN3   | TSPAN31  | TSPAN31  | TSPAN4   | TSPAN4   |
| XPNPEP2  |          |          |          |          |          |

*IRCC-HC samples*

stroma\_44\_IB stroma\_8\_non stroma\_12\_no stroma\_14\_no stroma\_11\_no stroma\_32\_no  
stroma\_17\_no stroma\_19\_no stroma\_20\_no stroma\_22\_no stroma\_25\_no stroma\_27\_no  
stroma\_34\_no

### 9.3.1 Comparing LAS and IRCC-HC biclusters

|                    | No ECM | ECM3 |
|--------------------|--------|------|
| No ECM3            | 647    | 45   |
| ECM3               | 108    | 103  |
| Jaccard similarity | 0.40   |      |

Table 53: Comparing gene lists: LAS (column) vs. IRCC-HC bicluster (row)

|                    | No ECM | ECM3 |
|--------------------|--------|------|
| No ECM3            | 33     | 1    |
| ECM3               | 2      | 11   |
| Jaccard similarity | 0.79   |      |

Table 54: Comparing sample lists: LAS (column) vs. IRCC-HC bicluster (row)

## 9.4 CCSS bicluster

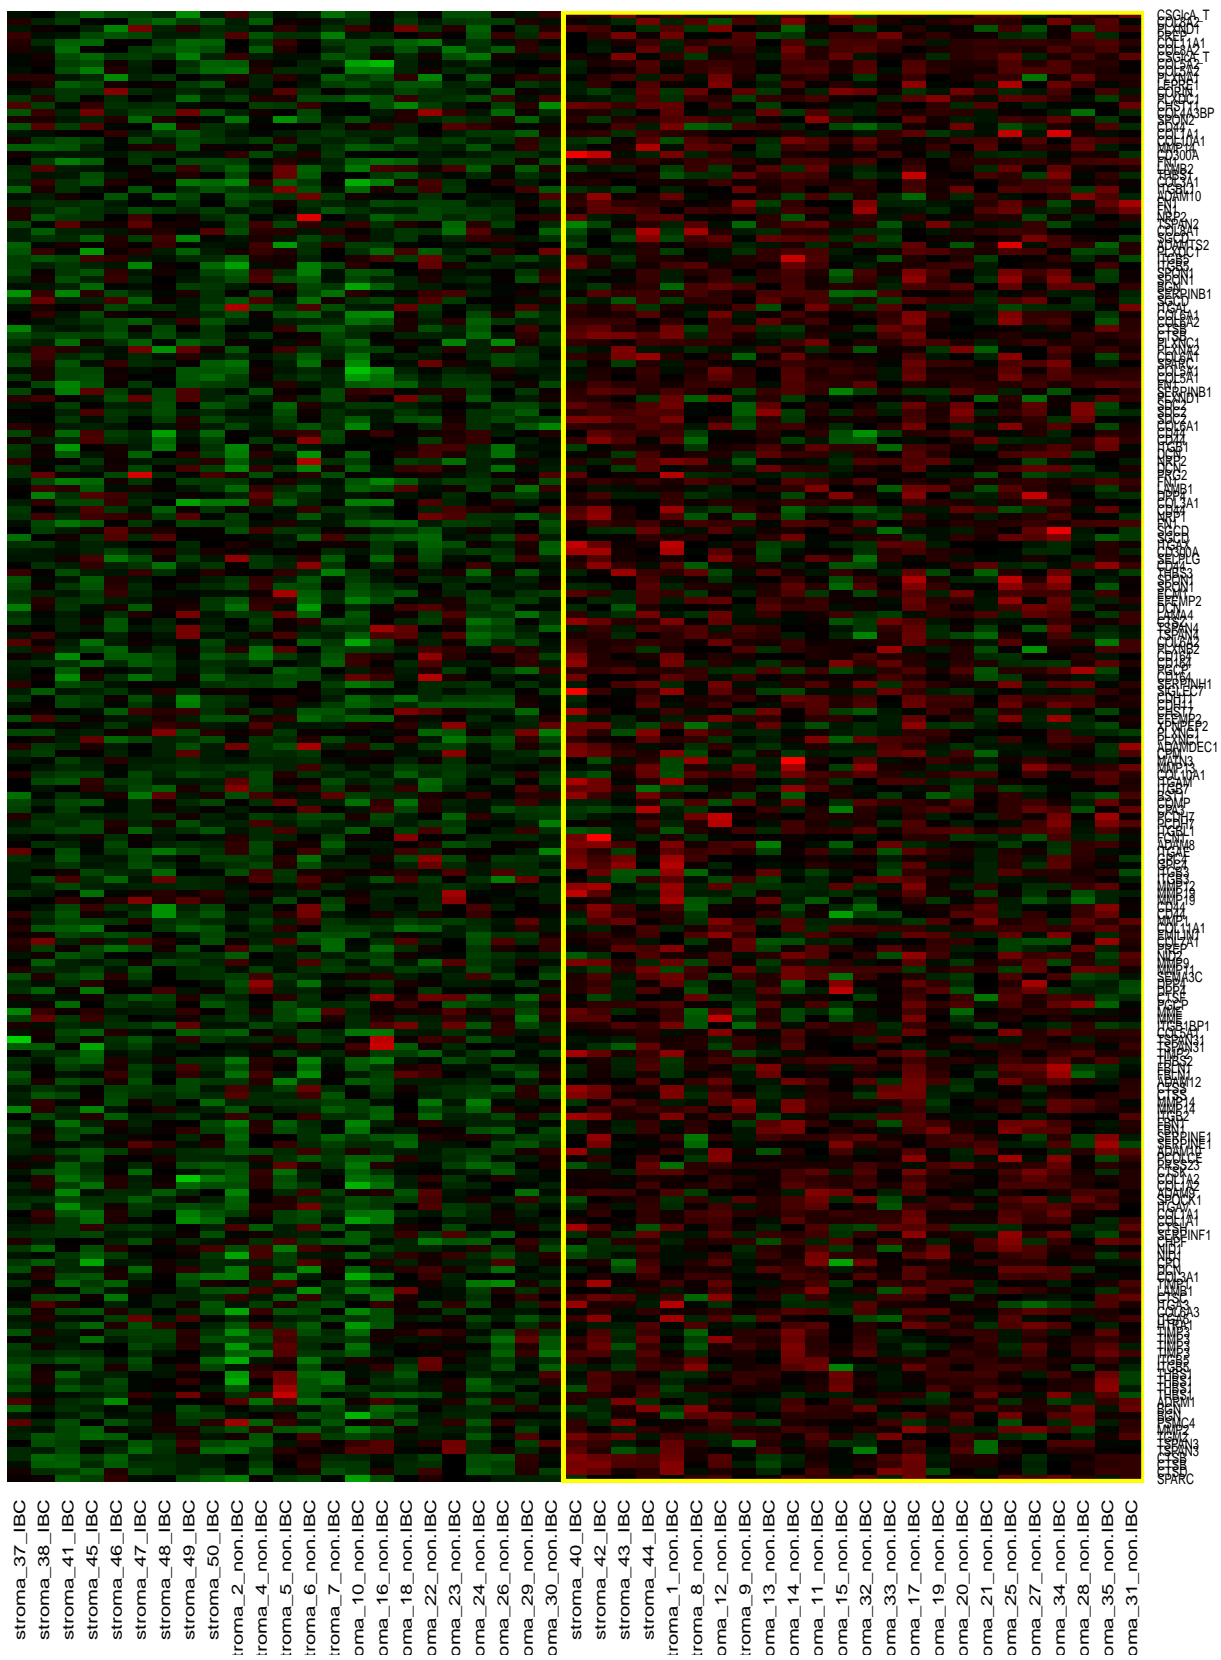

Figure 69: Heatmap of the CCSS bicluster

### 9.4.1 Comparing LAS and CCSS biclusters

|                    | No ECM | ECM3 |
|--------------------|--------|------|
| No ECM3            | 23     | 0    |
| ECM3               | 12     | 12   |
| Jaccard similarity | 0.50   |      |

Table 55: Comparing sample lists: LAS (column) vs. CCSS (row) biclusters

### 9.4.2 Prediction strength for CCSS

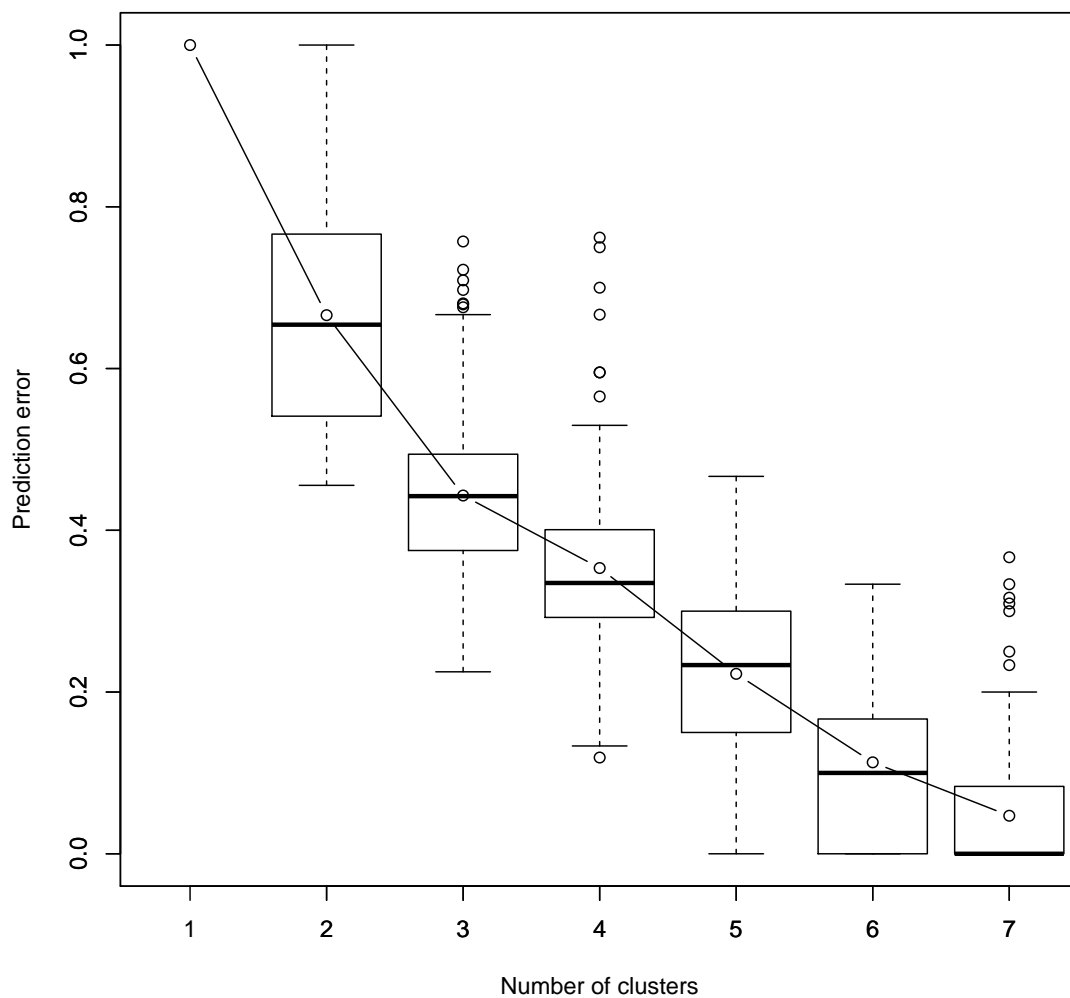

### 9.4.3 Consensus clustering

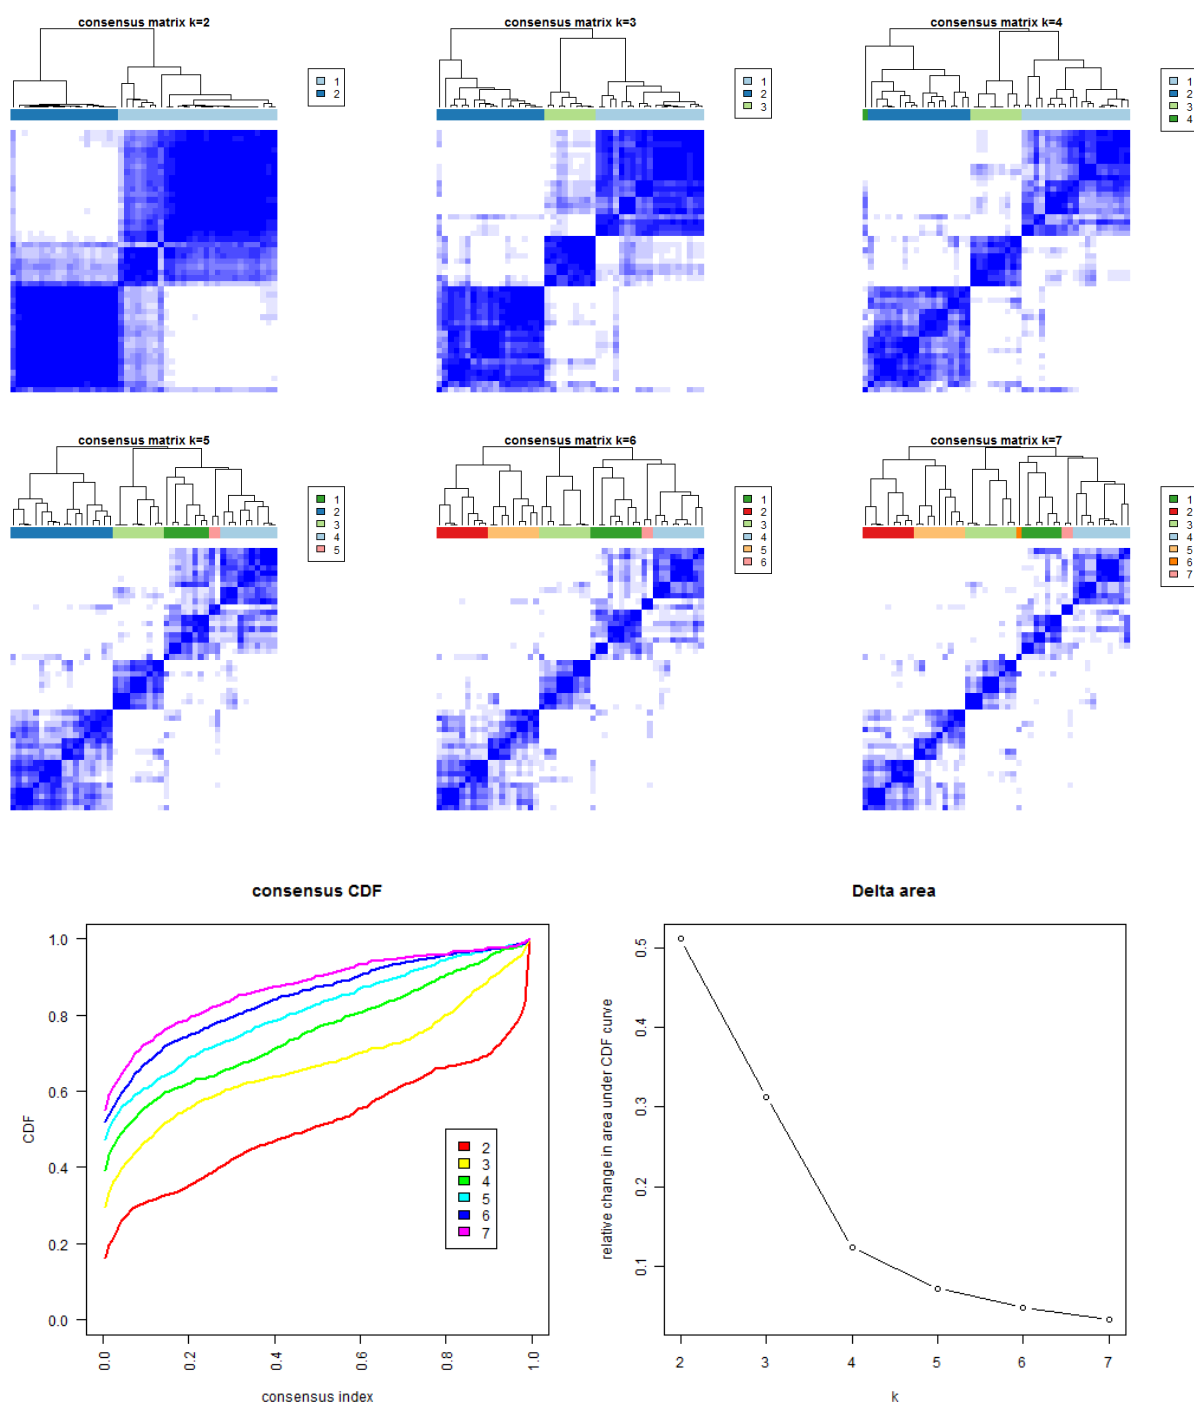

Figure 70: Statistical significance of CCSS clustering (Consensus clustering )

## 9.4.4 Statistical significance

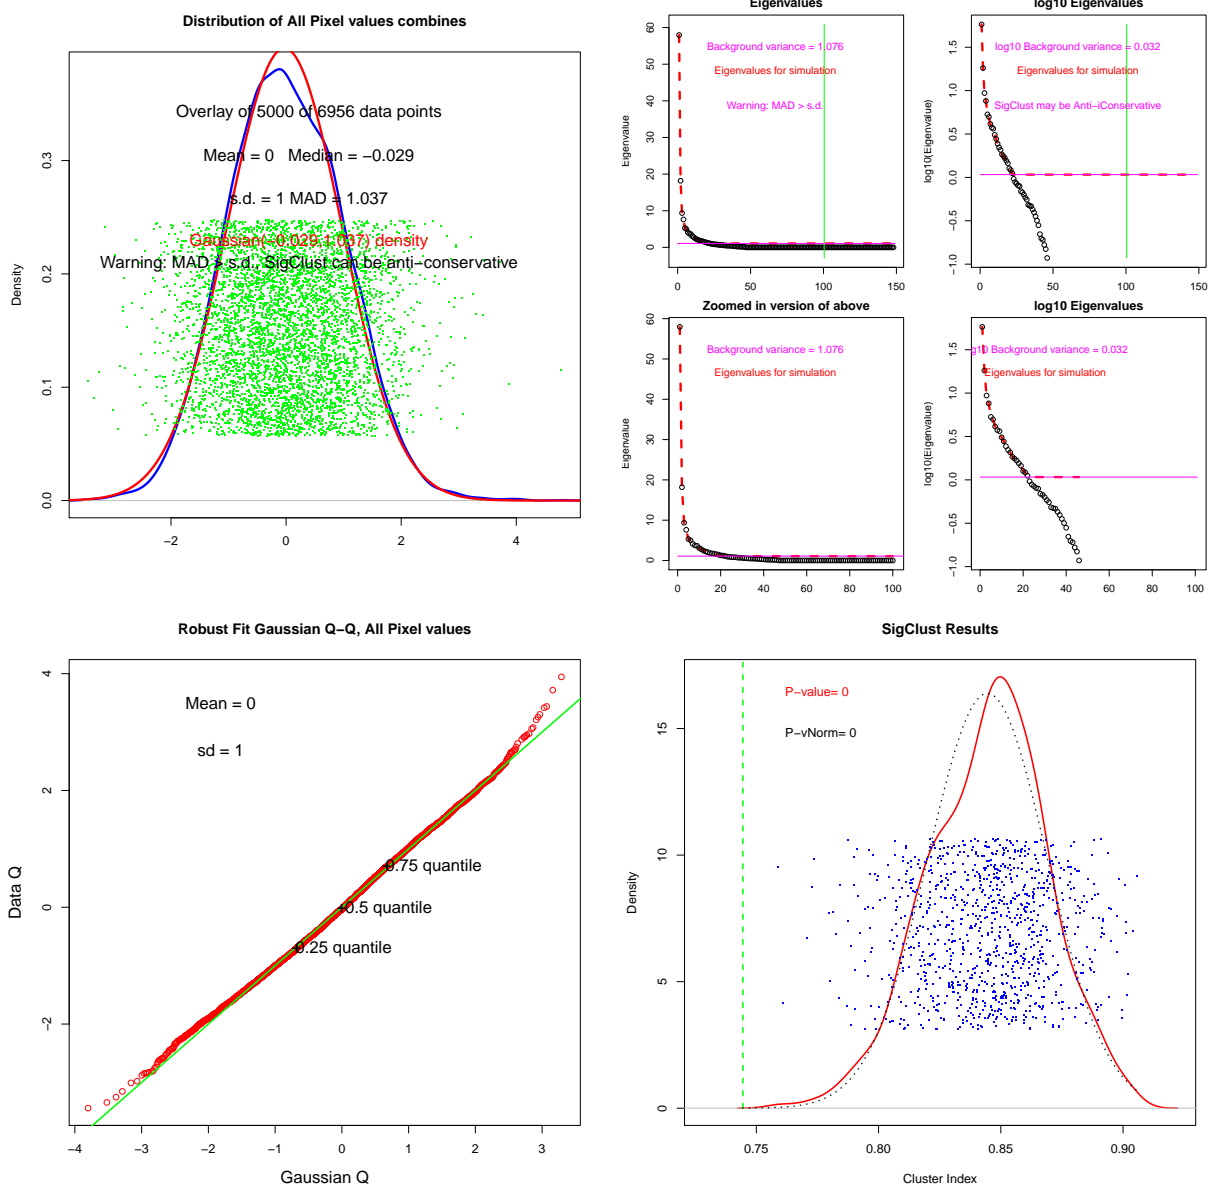

| P-value | P-vNorm |
|---------|---------|
| 0.0E+00 | 2.0E-05 |

Table 56: SigClust p-values

## 9.4.5 Cluster-wise assessment of cluster stability

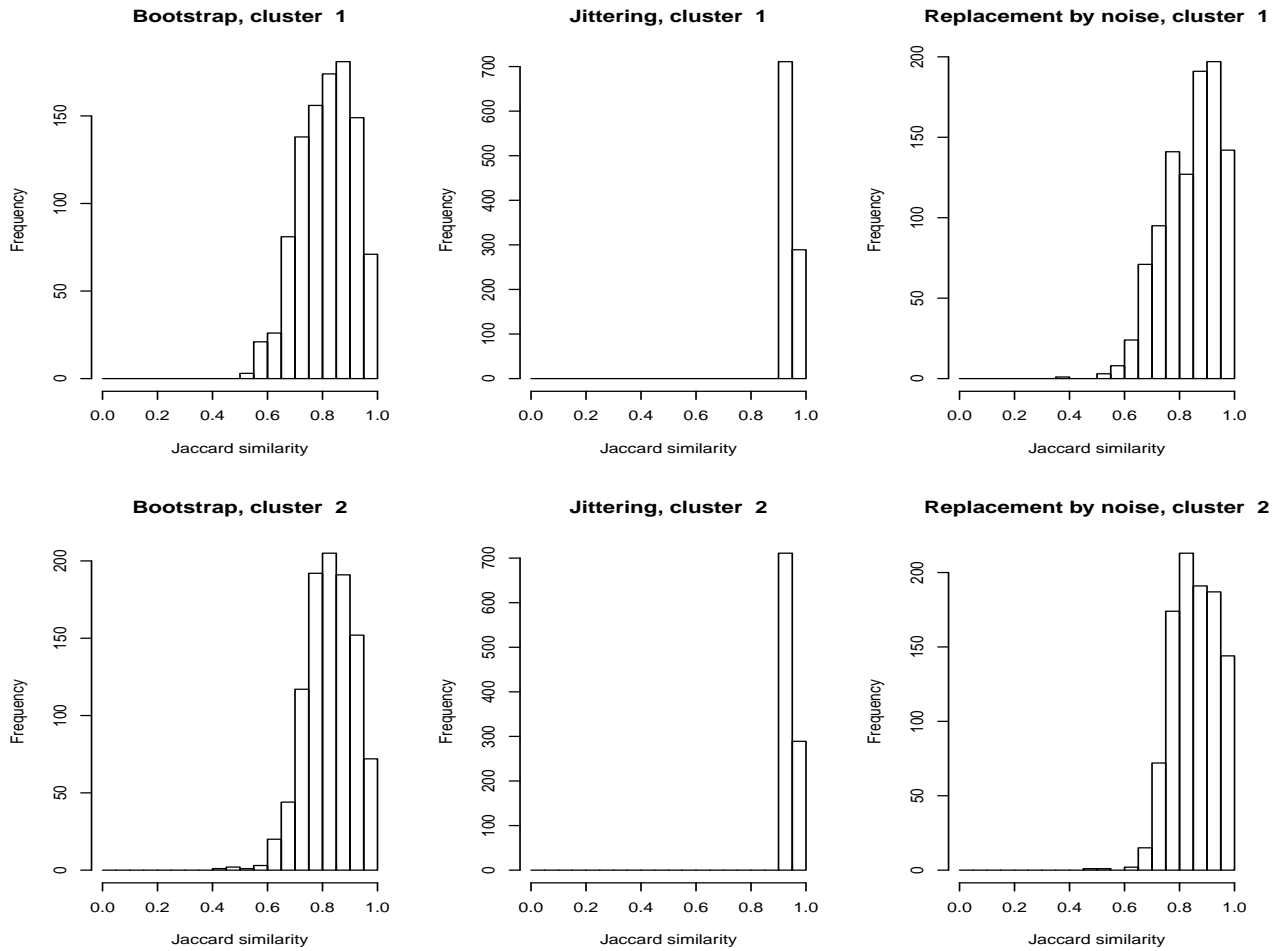

\* Cluster stability assessment \*

Cluster method: kmeans

Full clustering results are given as parameter result of the clusterboot object, which also provides further statistics of the resampling results.

Number of resampling runs: 1000

Number of clusters found in data: 2

Clusterwise Jaccard bootstrap mean:

[1] 0.8155460 0.8279897

dissolved:

[1] 0 3

recovered:

[1] 731 812

Clusterwise Jaccard jittering mean:

[1] 0.9613784 0.9633618

dissolved:

[1] 0 0

recovered:



```

[1] 1000 1000
Clusterwise Jaccard replacement by noise mean:
[1] 0.8409090 0.8565614
dissolved:
[1] 1 1
recovered:
[1] 798 909

```

*Removing one sample*

```

Min. 1st Qu. Median Mean 3rd Qu. Max.
0.9412 0.9444 1.0000 0.9795 1.0000 1.0000

```

*Removing one gene*

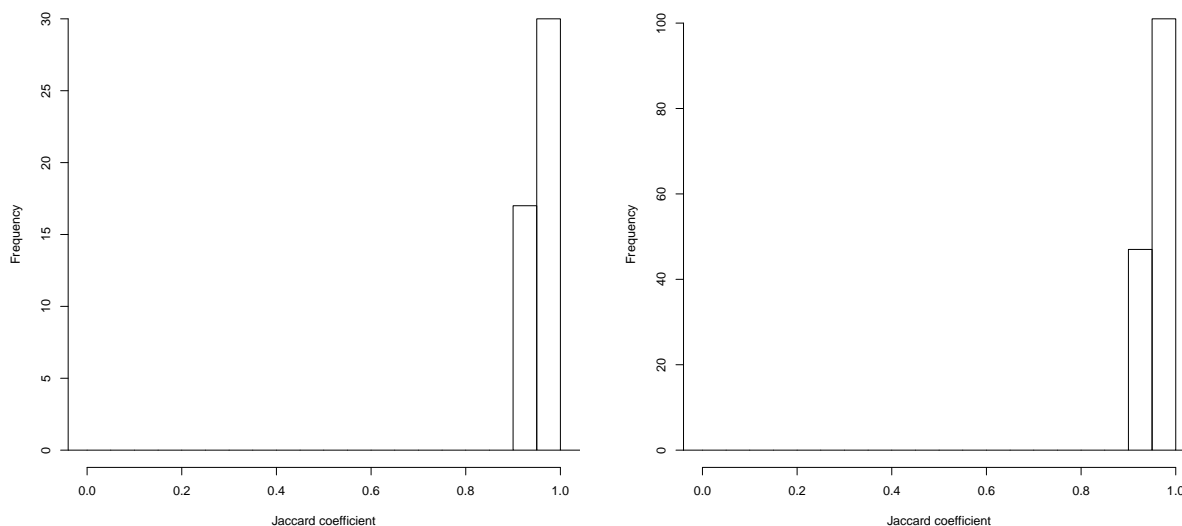

Figure 71: Removing one sample (left) and one gene (right) at a time: distributions of Jaccard coefficients

```

Min. 1st Qu. Median Mean 3rd Qu. Max.
0.9444 0.9444 1.0000 0.9824 1.0000 1.0000

```

| APN            | AD            | ADM           | FOM            |
|----------------|---------------|---------------|----------------|
| Min. :0.1824   | Min. :14.82   | Min. :2.759   | Min. :0.6602   |
| 1st Qu.:0.1824 | 1st Qu.:14.82 | 1st Qu.:2.759 | 1st Qu.:0.8317 |
| Median :0.2116 | Median :14.90 | Median :3.116 | Median :0.8855 |
| Mean :0.2023   | Mean :14.87   | Mean :3.003   | Mean :0.8784   |
| 3rd Qu.:0.2116 | 3rd Qu.:14.90 | 3rd Qu.:3.116 | 3rd Qu.:0.9403 |
| Max. :0.2116   | Max. :14.90   | Max. :3.116   | Max. :1.0012   |

*Removing sets of k genes*

```

Min. 1st Qu. Median Mean 3rd Qu. Max.
0.5769 0.8333 0.8889 0.8788 0.9444 1.0000

```

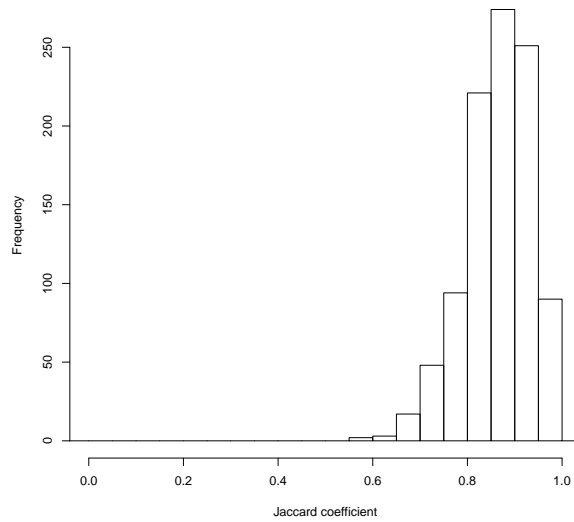

Figure 72: Removing two thirds of the genes: distribution of Jaccard coefficients

#### 9.4.6 Validation measures

Clustering Methods:

kmeans

Cluster sizes:

2 3 4 5 6

Validation Measures:

|        |              | 2       | 3       | 4       | 5       | 6       |
|--------|--------------|---------|---------|---------|---------|---------|
| kmeans | APN          | 0.0128  | 0.0110  | 0.0357  | 0.0391  | 0.0821  |
|        | AD           | 0.9731  | 0.8851  | 0.8341  | 0.7806  | 0.7606  |
|        | ADM          | 0.2520  | 0.1921  | 0.4987  | 0.5343  | 1.0879  |
|        | FOM          | 0.8784  | 0.8298  | 0.7906  | 0.7779  | 0.7580  |
|        | Connectivity | 57.8988 | 65.3385 | 68.7929 | 71.1440 | 74.5341 |
|        | Dunn         | 0.2775  | 0.2785  | 0.3473  | 0.3473  | 0.3438  |
|        | Silhouette   | 0.0093  | 0.0402  | 0.0361  | 0.0498  | 0.0381  |

Optimal Scores:

|              | Score   | Method | Clusters |
|--------------|---------|--------|----------|
| APN          | 0.0110  | kmeans | 3        |
| AD           | 0.7606  | kmeans | 6        |
| ADM          | 0.1921  | kmeans | 3        |
| FOM          | 0.7580  | kmeans | 6        |
| Connectivity | 57.8988 | kmeans | 2        |
| Dunn         | 0.3473  | kmeans | 4        |
| Silhouette   | 0.0498  | kmeans | 5        |

# 10 Boersma et al. (2008) (microdissected tumor cell samples)

## 10.1 LAS bicluster

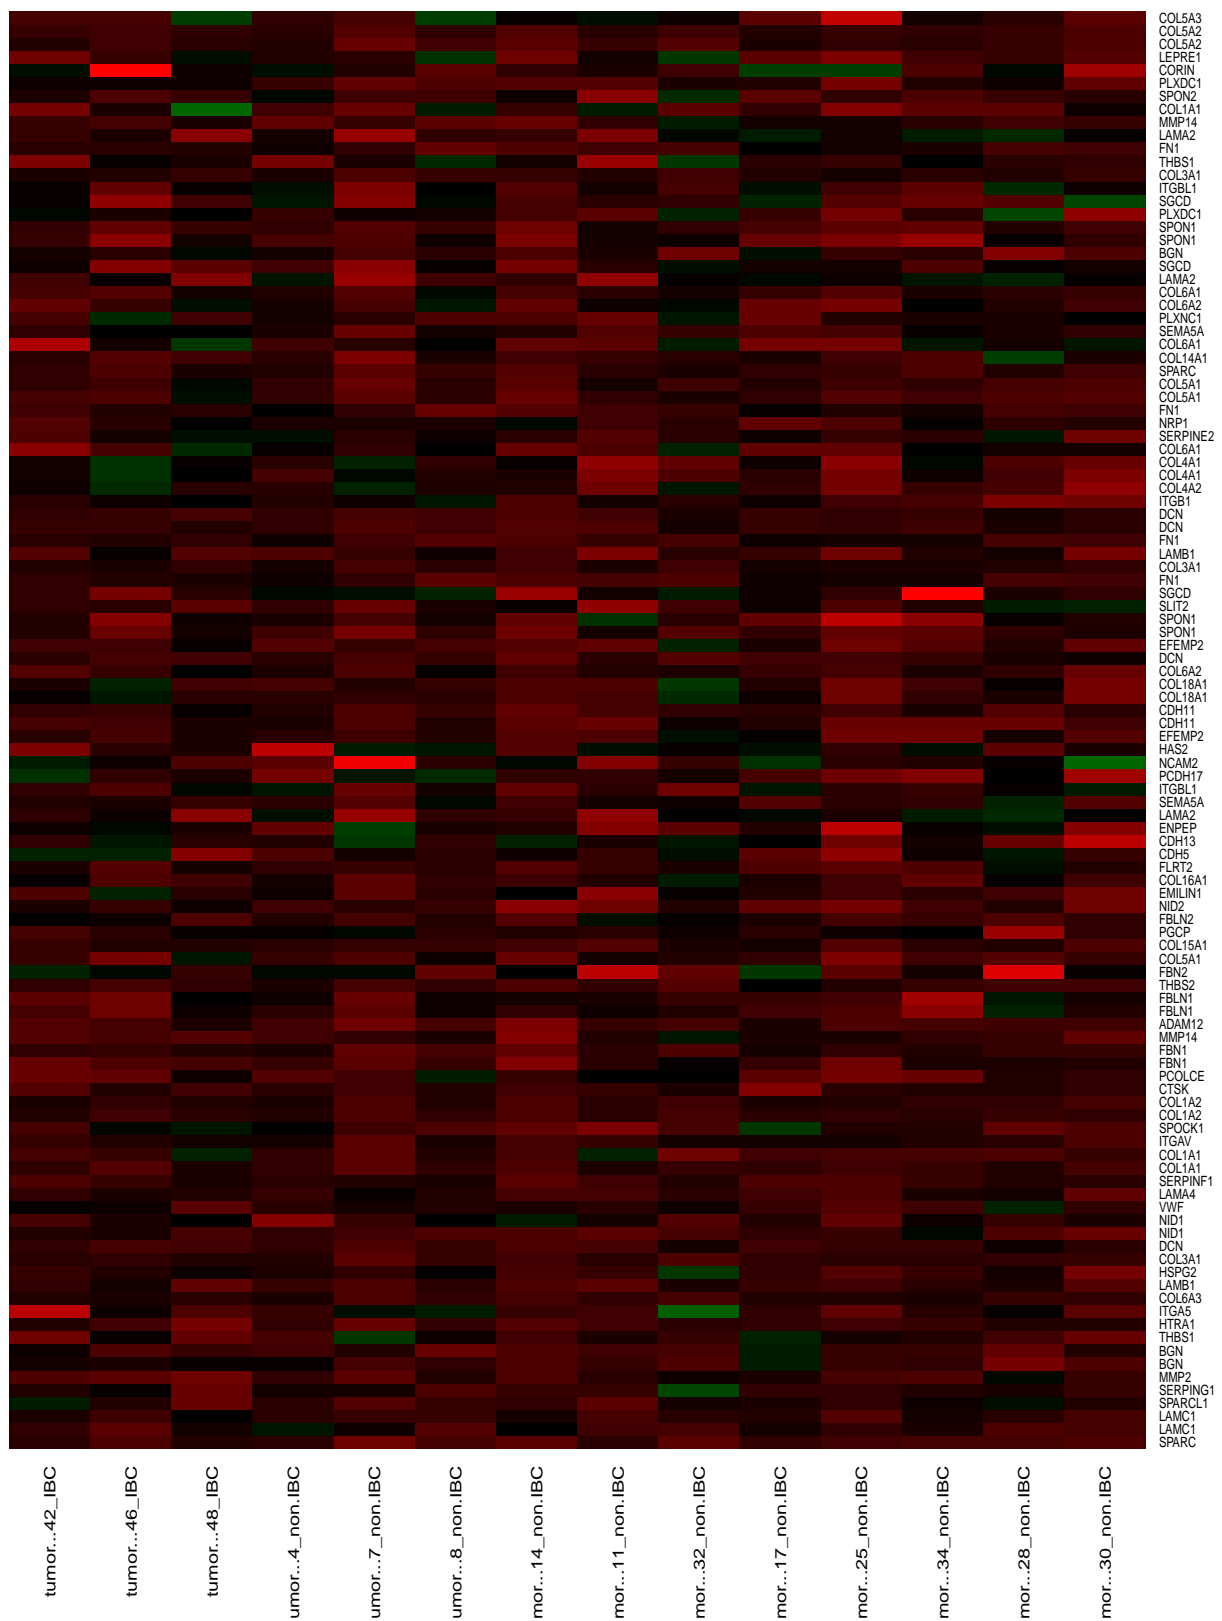

Figure 73: Heatmap of the LAS bicluster

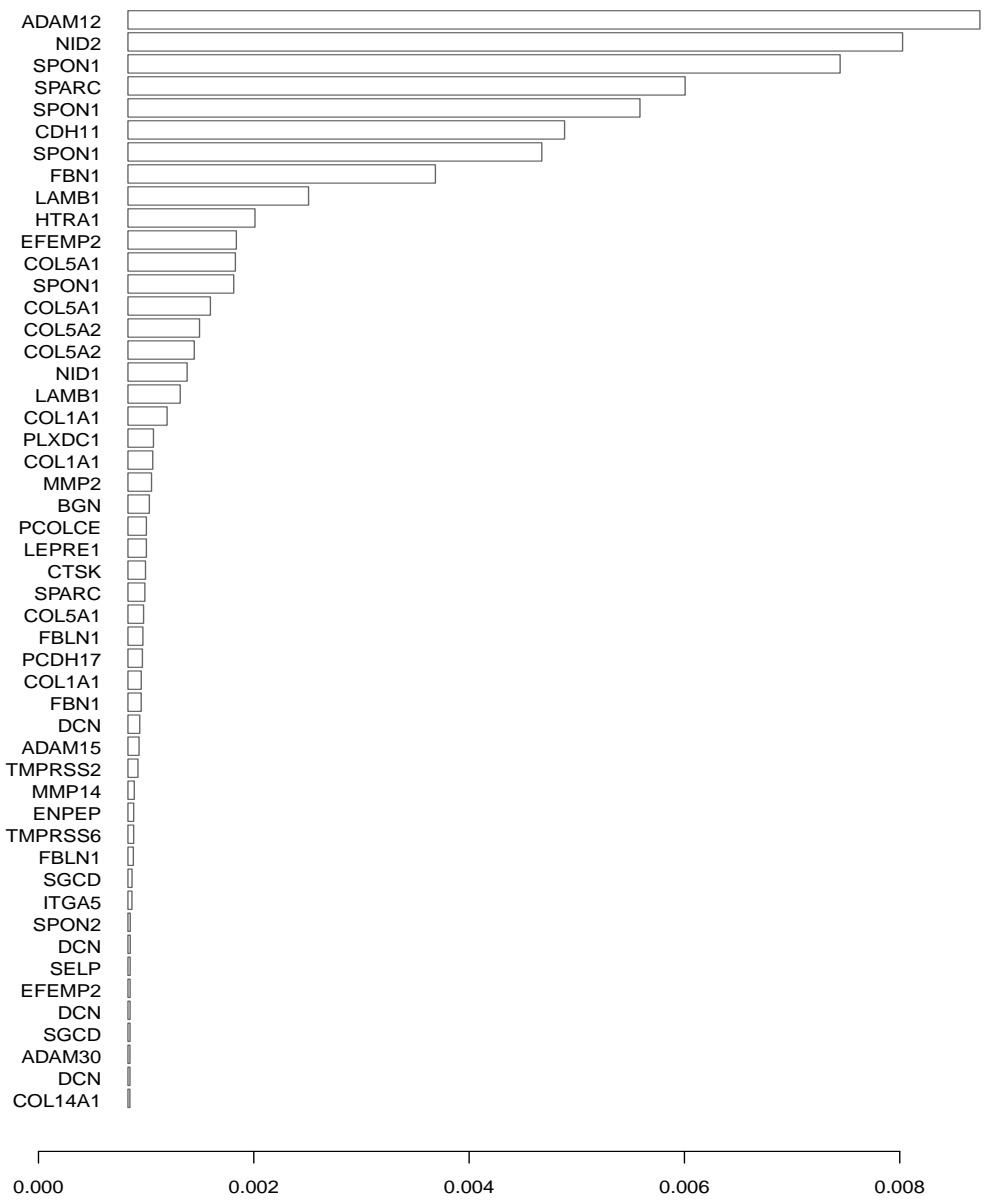

Figure 74: Most informative genes for the LAS bicluster

Number of informative genes of the LAS bicluster that also belong to the ECM3 consensus list: 28 of 34 (82%)

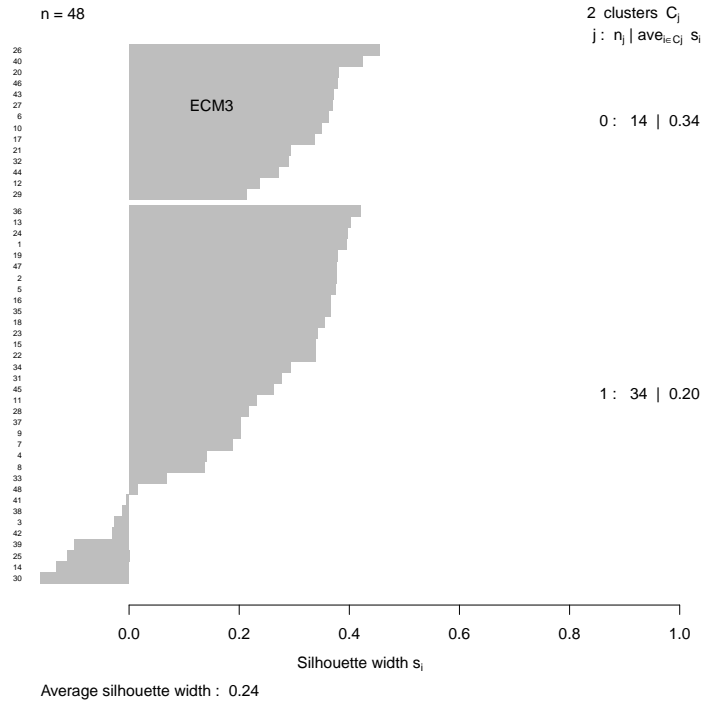

Figure 75: Silhouette plot for the LAS bicluster

| Connectivity | Dunn Index |
|--------------|------------|
| 11.62        | 0.34       |

Table 57: Connectivity validation measure and Dunn Index of LAS partitioning

## 10.2 IRCC-KM bicluster

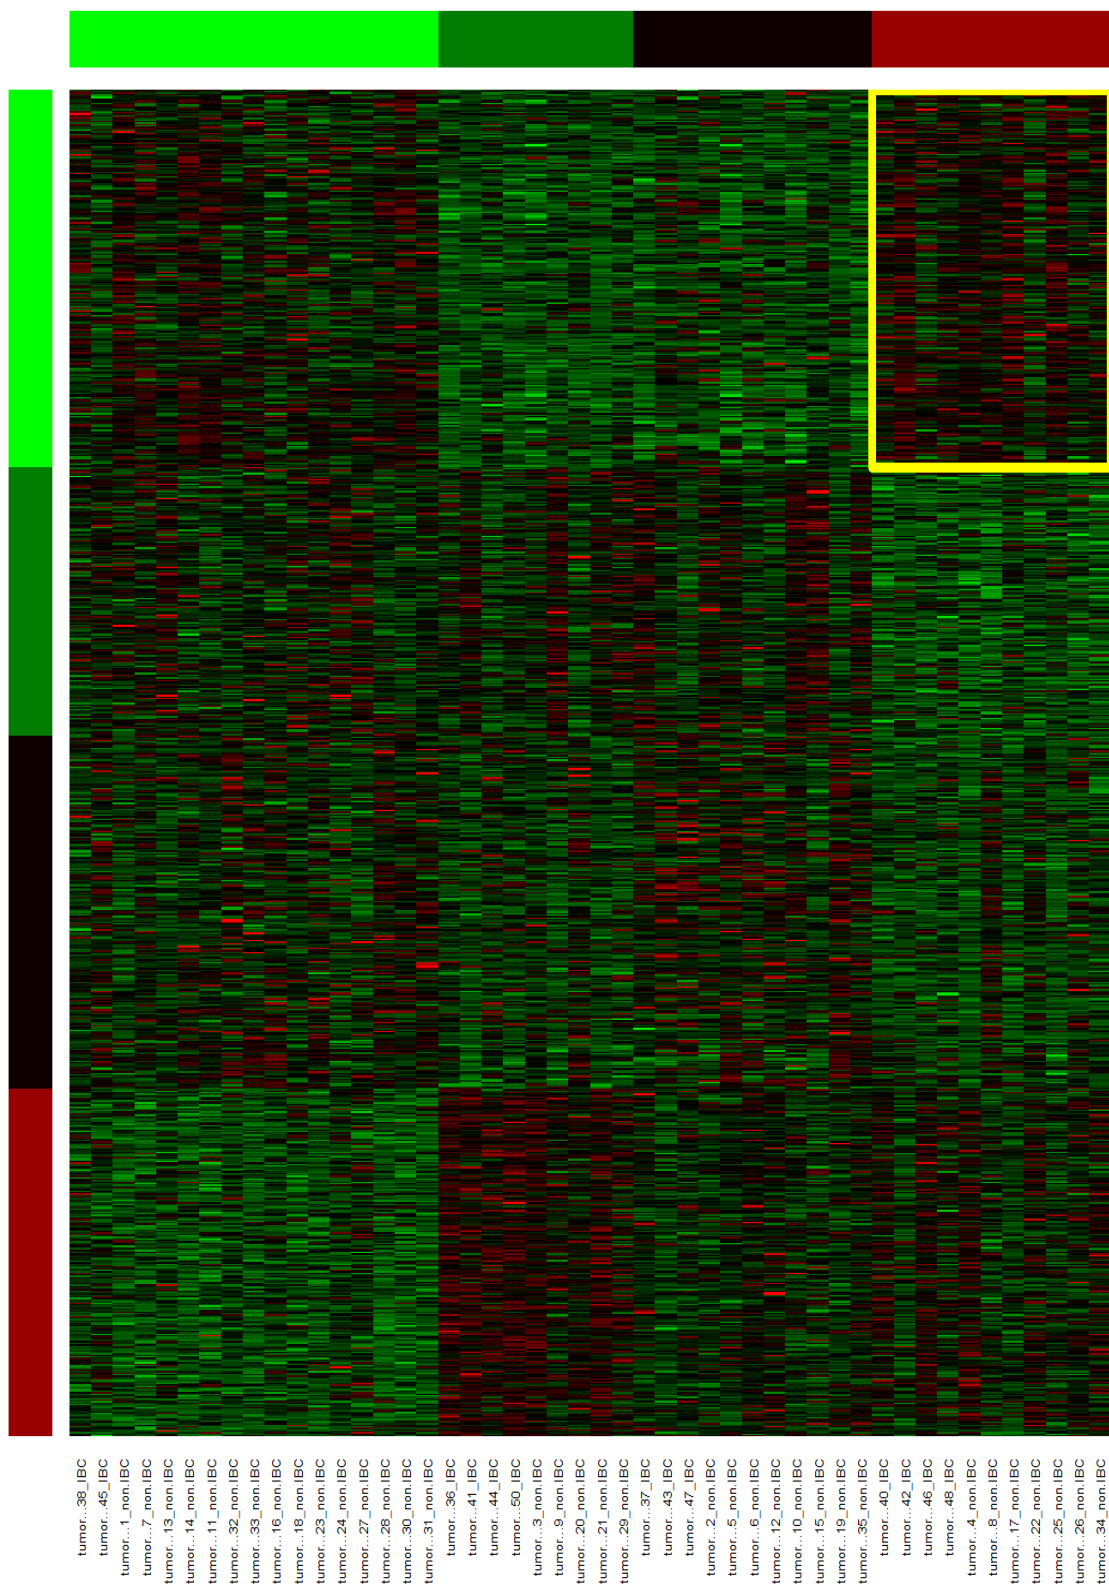

Figure 76: Heatmap of the IRCC-KM bicluster

*IRCC-KM genes*

|          |          |         |          |          |         |
|----------|----------|---------|----------|----------|---------|
| SPARC    | CTSD     | LAMC1   | LAMC1    | SPARCL1  | CTSB    |
| CTSB     | SERPING1 | TGM2    | MMP2     | BGN      | BGN     |
| THBS1    | THBS1    | CPE     | ITGB5    | ITGB5    | TIMP3   |
| TIMP3    | TIMP3    | TIMP3   | HTRA1    | ITGA5    | COL6A3  |
| CTSC     | LAMB1    | TNC     | HSPG2    | HSPG2    | TIMP1   |
| EFEMP1   | COL3A1   | DCN     | CPD      | NID1     | NID1    |
| VWF      | LAMA4    | TSPAN7  | SERPINF1 | STAG1    | CTSH    |
| COL1A1   | COL1A1   | MATN2   | ITGAV    | SPOCK1   | COL1A2  |
| COL1A2   | CTSK     | PCOLCE  | SERPINE1 | SERPINE1 | FBN1    |
| FBN1     | ITGB2    | MMP14   | CTSS     | CTSS     | ADAM12  |
| FBLN1    | FBLN1    | CHSY1   | THBS2    | FBLN5    | TIMP2   |
| COL5A1   | ITGB1BP1 | MME     | MME      | COL15A1  | PGCP    |
| DPP4     | DPP4     | CTSO    | SEMA3C   | SLIT3    | VCAM1   |
| FBLN2    | MMP9     | NID2    | EMILIN1  | COL16A1  | FLRT2   |
| FLRT2    | SELL     | MMP19   | MMP12    | CHL1     | ITGB3   |
| ITGB3    | CDH5     | ICAM2   | CDH13    | ENPEP    | ENPEP   |
| GPC4     | GPC4     | LAMA2   | ADAM8    | FCN1     | SEMA5A  |
| ITGBL1   | GZMA     | CDH6    | CPA3     | PCDH17   | NCAM2   |
| COMP     | BST1     | ADAM17  | ITGAM    | ITGA4    | SELP    |
| CPM      | ADAMDEC1 | SELE    | HAS2     | PLXNC1   | CD36    |
| EFEMP2   | CHST7    | CDH11   | CDH11    | ADIPOQ   | SIGLEC7 |
| CD209    | HAS1     | ADAM28  | PGCP     | TNXB     | PECAM1  |
| PECAM1   | PECAM1   | COL18A1 | COL18A1  | MCAM     | COL6A2  |
| GPC3     | SMC3     | TSPAN4  | TSPAN4   | CTSZ     | LAMA4   |
| DCN      | EFEMP2   | ECM1    | SPON1    | SPON1    | CD36    |
| SERPINB9 | ADAM19   | SELPLG  | SLIT2    | CD300A   | ITGAX   |
| SGCD     | FN1      | NRP1    | MCAM     | CD44     | TGM2    |
| COL3A1   | MCAM     | DPP4    | LAMB1    | FN1      | DCN     |
| DCN      | ITGB1    | COL4A2  | COL4A2   | COL4A1   | COL4A1  |
| COL6A1   | SDC2     | SDC2    | SDC2     | SERPINE2 | PLXND1  |
| NRP1     | FN1      | COL5A1  | COL5A1   | SPG20    | SPARC   |
| ELN      | COL14A1  | COL6A1  | SEMA5A   | PLXNC1   | CTSB    |
| CTSB     | COL6A2   | ITGA4   | COL6A1   | ITGAL    | SNED1   |
| SNED1    | LAMA2    | ADAM17  | SGCD     | ICAM2    | BGN     |
| SPON1    | SPON1    | ITGB5   | ITGB5    | PLXDC1   | OPCML   |
| SGCD     | SPG7     | FN1     | ADAMTS3  | ITGBL1   | COL3A1  |
| ITGB3    | TNN      | THBS1   | TNC      | LAMB2    | ITGA7   |
| FN1      | LAMA2    | CD300A  | MMP14    | COL1A1   | SPON2   |
| CHST12   | COL5A3   | SIGLEC1 | COL4A3BP | CHST11   | PCDH12  |
| SEMA3G   | PLXDC1   | MMP28   | ADAMTS5  | ADAMTS9  | CORIN   |
| LEPRE1   | ADAMTS6  | TMPRSS5 | PLXNA1   | COL5A2   | COL5A2  |
| CSG1cA_T | CLU      | NAALAD2 | ADAMTS1  | PLXND1   | COL5A3  |
| CSG1cA_T |          |         |          |          |         |

*IRCC-KM samples*

tumor...40\_I tumor...42\_I tumor...46\_I tumor...48\_I tumor...4\_no tumor...8\_no  
tumor...17\_n tumor...22\_n tumor...25\_n tumor...26\_n tumor...34\_n

### 10.2.1 Comparing LAS and IRCC-KM biclusters

|                    | No ECM | ECM3 |
|--------------------|--------|------|
| No ECM3            | 649    | 1    |
| ECM3               | 144    | 109  |
| Jaccard similarity | 0.43   |      |

Table 58: Comparing gene lists: LAS (column) vs. IRCC-KM bicluster (row)

|                    | No ECM | ECM3 |
|--------------------|--------|------|
| No ECM3            | 31     | 6    |
| ECM3               | 3      | 8    |
| Jaccard similarity | 0.47   |      |

Table 59: Comparing sample lists: LAS (column) vs. IRCC-KM bicluster (row)



### 10.3 IRCC-HC bicluster

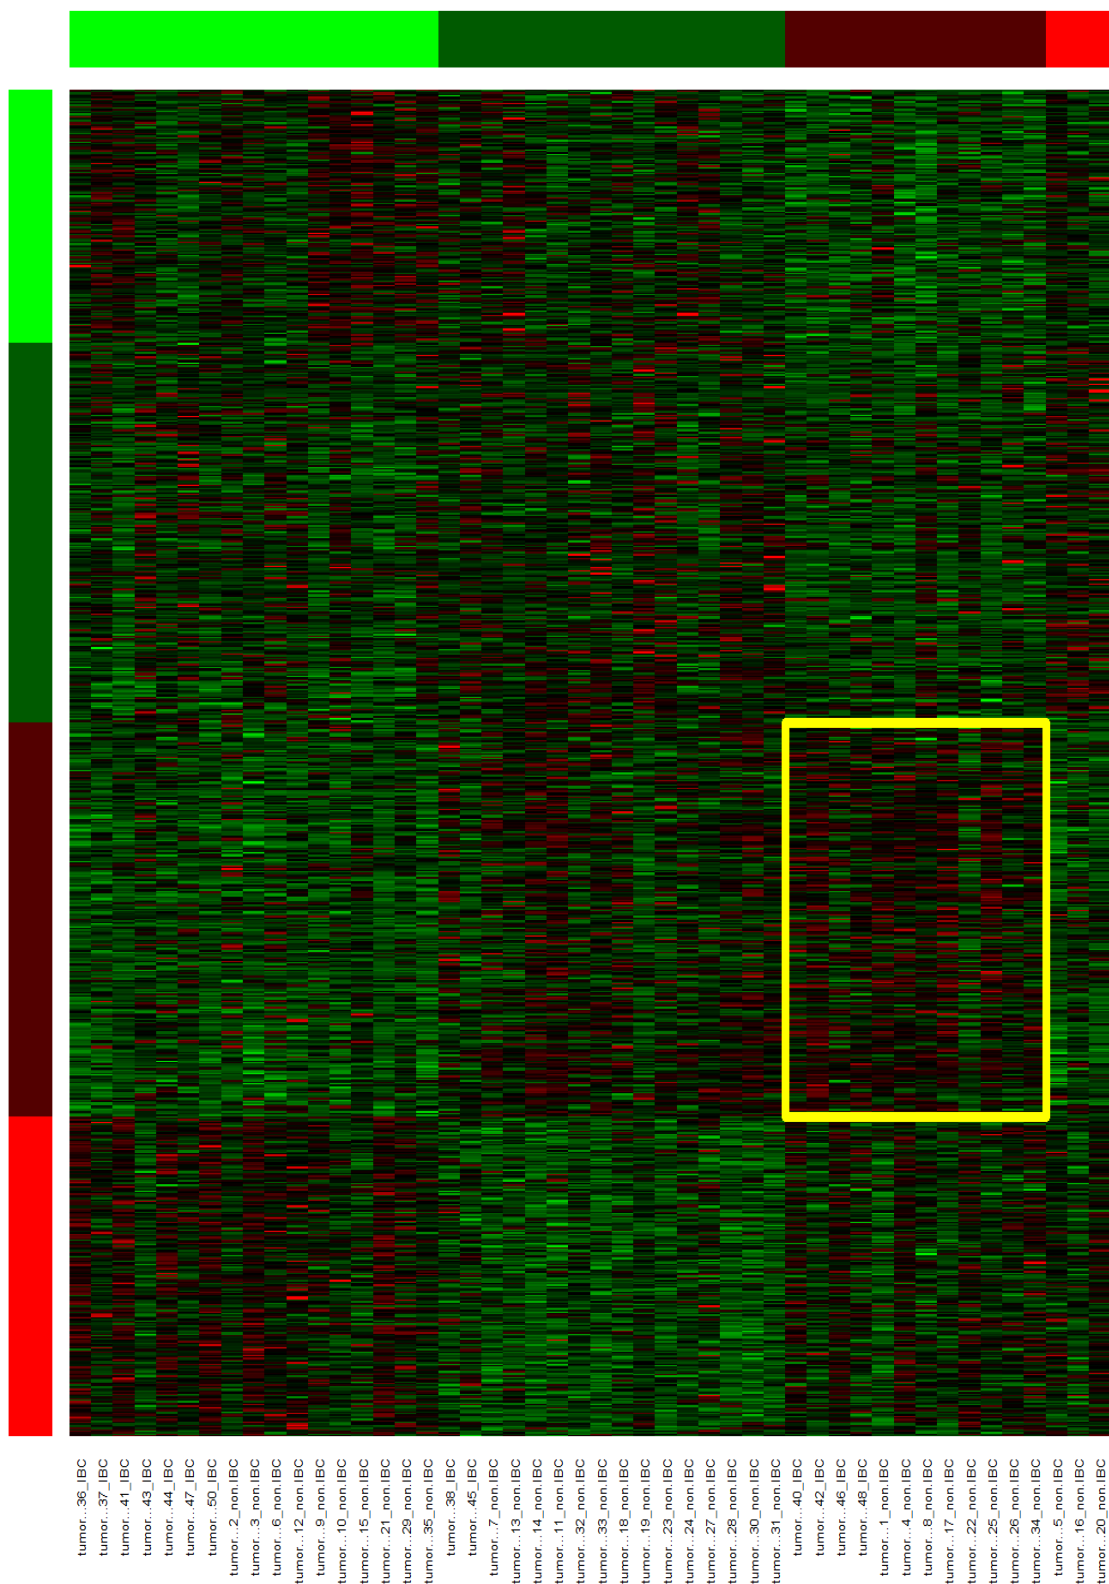

Figure 77: Heatmap of the IRCC-HC bicluster

*IRCC-HC genes*

|          |          |          |          |              |          |
|----------|----------|----------|----------|--------------|----------|
| ADAM12   | ADAM12   | ADAM17   | ADAM17   | ADAM19       | ADAM28   |
| ADAM28   | ADAM3A   | ADAM8    | ADAMDEC1 | ADAMTS1      | ADAMTS2  |
| ADAMTS5  | ADAMTS9  | ADIPOQ   | BGN      | BGN          | BGN      |
| BST1     | CD209    | CD300A   | CD300A   | CD36         | CD36     |
| CD6      | CDH11    | CDH11    | CDH13    | CDH5         | CDH6     |
| CHL1     | CHST11   | CHST12   | CHST2    | CHST7        | COL10A1  |
| COL10A1  | COL11A1  | COL11A1  | COL14A1  | COL15A1      | COL16A1  |
| COL18A1  | COL18A1  | COL1A1   | COL1A1   | COL1A1       | COL1A2   |
| COL1A2   | COL3A1   | COL3A1   | COL3A1   | COL4A1       | COL4A1   |
| COL4A2   | COL4A2   | COL4A3BP | COL5A1   | COL5A1       | COL5A1   |
| COL5A2   | COL5A2   | COL5A3   | COL5A3   | COL6A1       | COL6A1   |
| COL6A1   | COL6A2   | COL6A2   | COL6A3   | COL8A2       | COL8A2   |
| COMP     | CORIN    | CPA3     | CPM      | CPM          | CTSB     |
| CTSB     | CTSB     | CTSB     | CTSC     | CTSD         | CTSG     |
| CTSH     | CTSK     | CTSS     | CTSS     | CTSW         | CTSZ     |
| DCN      | DCN      | DCN      | DCN      | DKFZP586H212 | DPP4     |
| DPP4     | DPP4     | EFEMP2   | EFEMP2   | EMILIN1      | ENPEP    |
| ENPEP    | FBLN1    | FBLN1    | FBLN2    | FBN1         | FBN1     |
| FCN1     | FLRT2    | FLRT2    | FN1      | FN1          | FN1      |
| FN1      | GZMA     | GZMB     | GZMH     | GZMK         | HAS1     |
| HAS2     | HSPG2    | HTRA1    | HYAL2    | ICAM1        | ICAM1    |
| ICAM2    | ICAM2    | ITGA10   | ITGA3    | ITGA4        | ITGA4    |
| ITGA5    | ITGA7    | ITGAE    | ITGAL    | ITGAM        | ITGAX    |
| ITGB1    | ITGB2    | ITGB3    | ITGB3    | ITGB3        | ITGB7    |
| ITGBL1   | ITGBL1   | LAMA2    | LAMA2    | LAMA2        | LAMA4    |
| LAMB1    | LAMB1    | LEPRE1   | MARCO    | MATN1        | MATN2    |
| MATN3    | MCAM     | MCAM     | MCAM     | MCAM         | MME      |
| MME      | MMP11    | MMP11    | MMP12    | MMP13        | MMP14    |
| MMP14    | MMP16    | MMP19    | MMP2     | MMP28        | MMP7     |
| MMP9     | NAALAD2  | NCAM2    | NID1     | NID1         | NID2     |
| NRP1     | NRP1     | NRP2     | OPCML    | PCDH12       | PCDH17   |
| PCOLCE   | PECAM1   | PECAM1   | PECAM1   | PLXDC1       | PLXDC1   |
| PLXNA1   | PLXNA1   | PLXNC1   | PLXNC1   | PLXND1       | PLXND1   |
| ROBO1    | SELE     | SELL     | SELP     | SELPLG       | SEMA3C   |
| SEMA3C   | SEMA3G   | SEMA4D   | SEMA5A   | SEMA5A       | SERPINB9 |
| SERPINE1 | SERPINE1 | SERPINF1 | SERPING1 | SERPINH1     | SGCD     |
| SGCD     | SGCD     | SGCD     | SIGLEC1  | SIGLEC1      | SIGLEC7  |
| SIGLEC9  | SLIT2    | SLIT3    | SNED1    | SNED1        | SPARC    |
| SPARC    | SPARCL1  | SPOCK1   | SPOCK2   | SPOCK2       | SPOCK3   |
| SPON1    | SPON1    | SPON1    | SPON1    | SPON2        | TGM2     |
| TGM2     | THBS1    | THBS1    | THBS1    | THBS1        | THBS1    |
| THBS2    | THBS4    | TIMP1    | TIMP2    | TIMP3        | TIMP3    |
| TIMP3    | TIMP3    | TNC      | TNC      | TNXB         | TSPAN3   |
| TSPAN3   | TSPAN4   | TSPAN4   | TSPAN7   | VCAM1        | VWF      |

*IRCC-HC samples*

tumor...40\_I tumor...42\_I tumor...46\_I tumor...48\_I tumor...1\_no tumor...4\_no  
tumor...8\_no tumor...17\_n tumor...22\_n tumor...25\_n tumor...26\_n tumor...34\_n

### 10.3.1 Comparing LAS and IRCC-HC biclusters

|                    | No ECM | ECM3 |
|--------------------|--------|------|
| No ECM3            | 632    | 7    |
| ECM3               | 161    | 103  |
| Jaccard similarity | 0.38   |      |

Table 60: Comparing gene lists: LAS (column) vs. IRCC-HC bicluster (row)

|                    | No ECM | ECM3 |
|--------------------|--------|------|
| No ECM3            | 30     | 6    |
| ECM3               | 4      | 8    |
| Jaccard similarity | 0.44   |      |

Table 61: Comparing sample lists: LAS (column) vs. IRCC-HC bicluster (row)



### 10.4.1 Comparing LAS and CCSS biclusters

|                    | No ECM | ECM3 |
|--------------------|--------|------|
| No ECM3            | 23     | 0    |
| ECM3               | 11     | 14   |
| Jaccard similarity | 0.56   |      |

Table 62: Comparing sample lists: LAS (column) vs. CCSS (row) biclusters

### 10.4.2 Prediction strength for CCSS

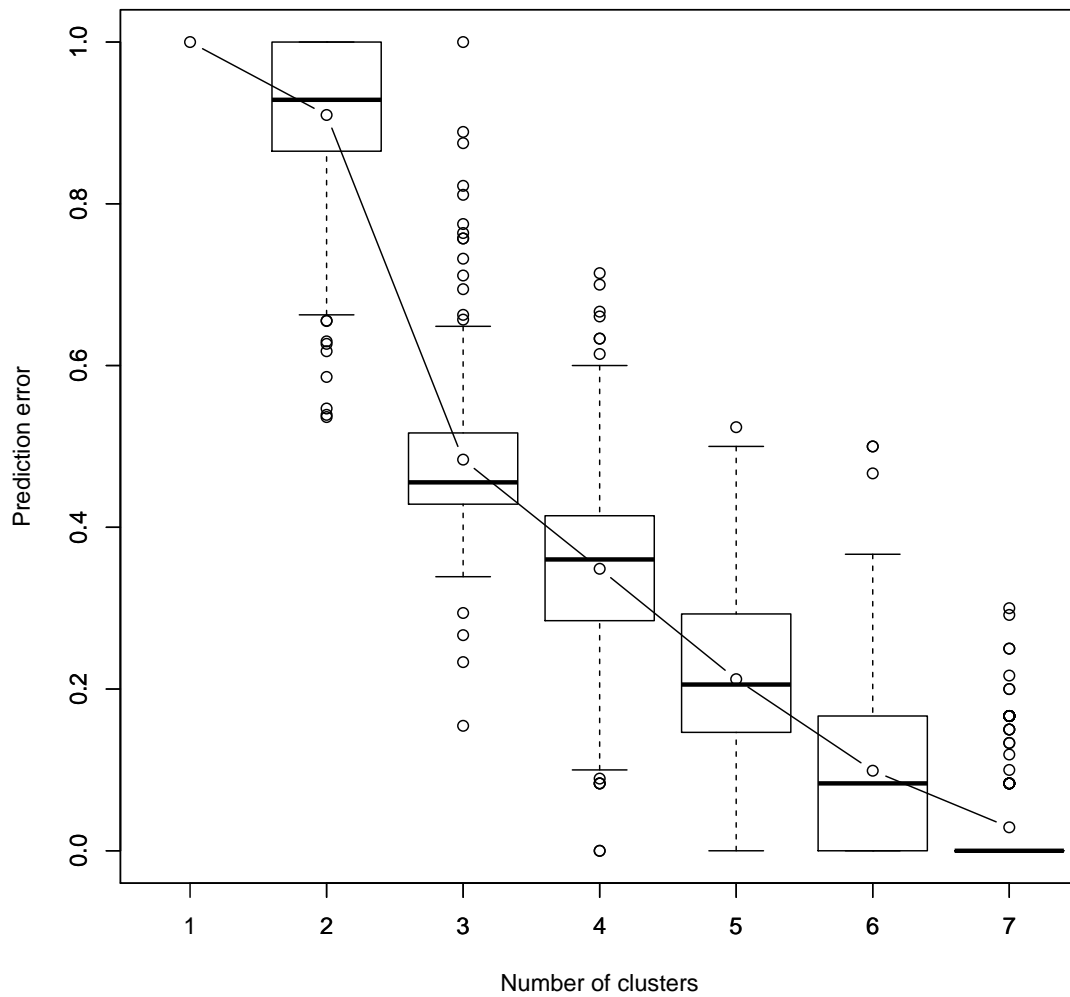

### 10.4.3 Consensus clustering

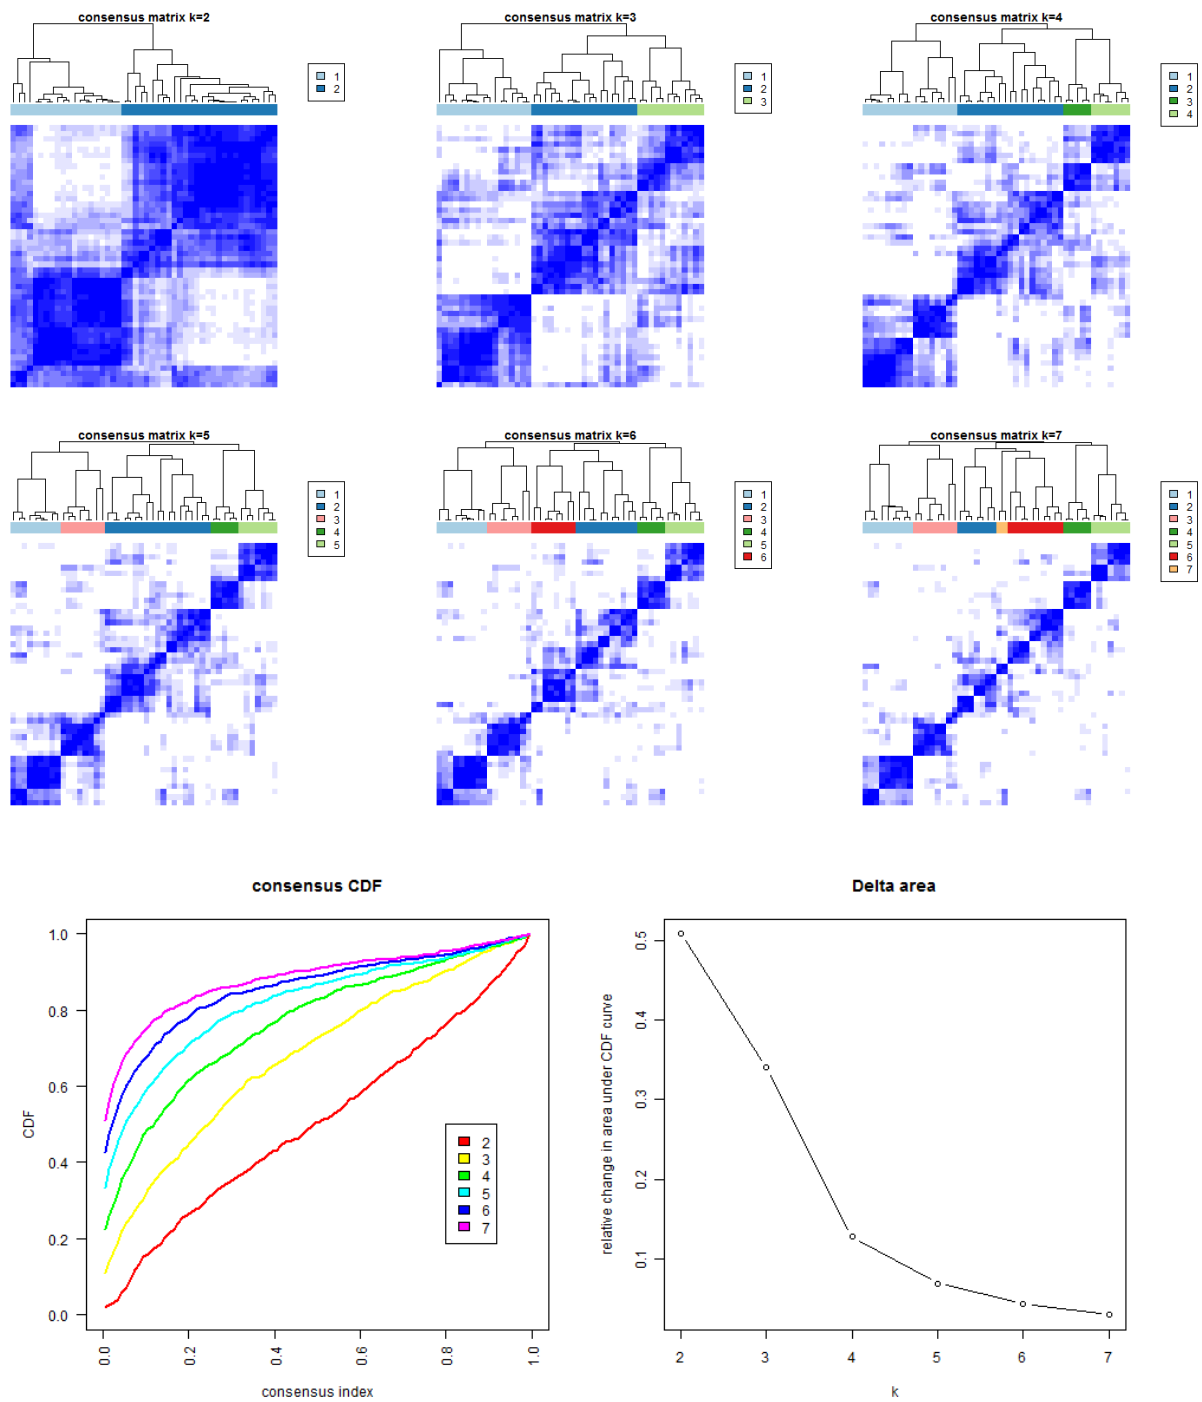

Figure 79: Statistical significance of CCSS clustering (Consensus clustering )

## 10.4.4 Statistical significance

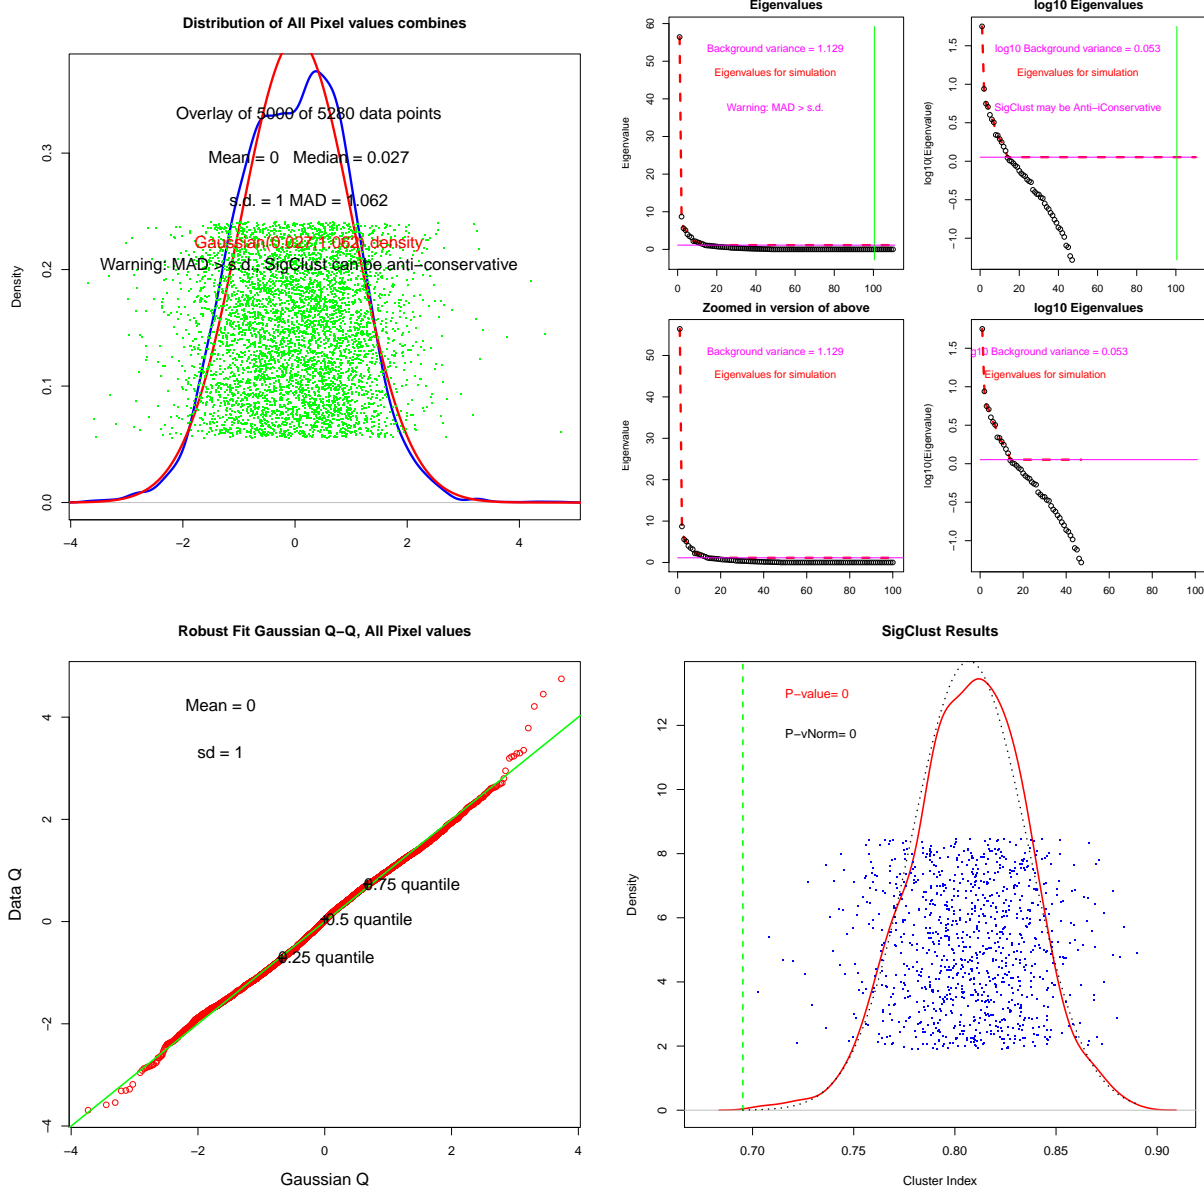

| P-value | P-vNorm |
|---------|---------|
| 0.0E+00 | 4.4E-05 |

Table 63: SigClust p-values

## 10.4.5 Cluster-wise assessment of cluster stability

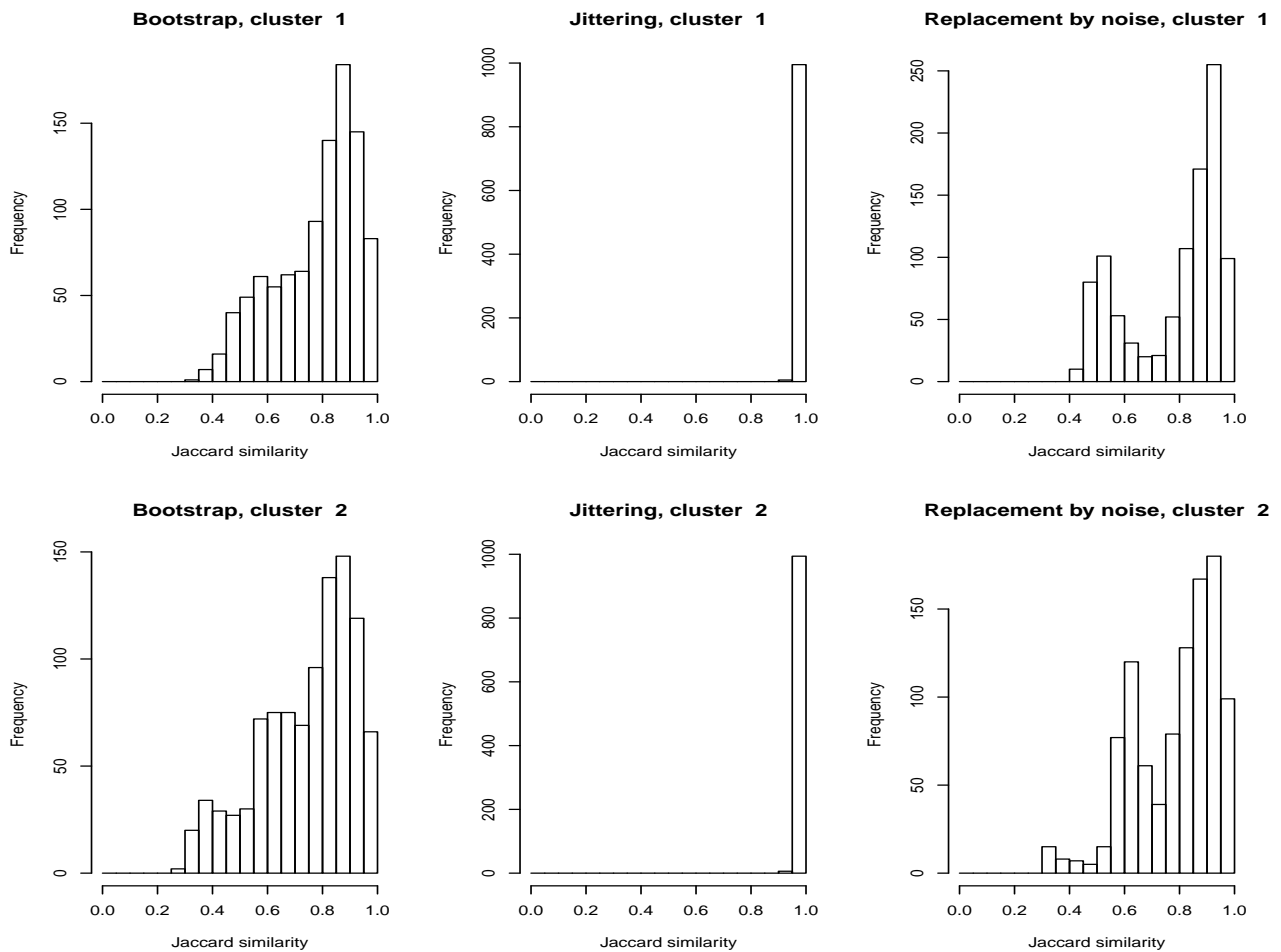

\* Cluster stability assessment \*

Cluster method: kmeans

Full clustering results are given as parameter result of the clusterboot object, which also provides further statistics of the resampling results.

Number of resampling runs: 1000

Number of clusters found in data: 2

Clusterwise Jaccard bootstrap mean:

[1] 0.7789089 0.7438281

dissolved:

[1] 64 112

recovered:

[1] 645 567

Clusterwise Jaccard jittering mean:

[1] 0.9990581 0.9989084

dissolved:

[1] 0 0

recovered:



```

[1] 1000 1000
Clusterwise Jaccard replacement by noise mean:
[1] 0.7869988 0.7863675
dissolved:
[1] 90 35
recovered:
[1] 684 653

```

*Removing one sample*

```

Min. 1st Qu. Median Mean 3rd Qu. Max.
0.5106 0.5106 0.5106 0.5208 0.5319 0.5319

```

*Removing one gene*

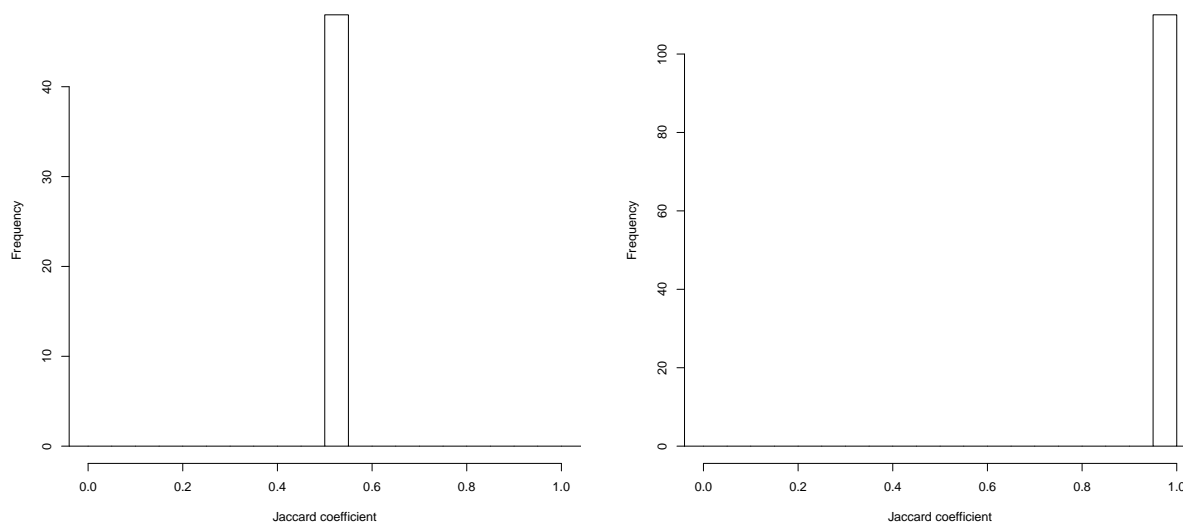

Figure 80: Removing one sample (left) and one gene (right) at a time: distributions of Jaccard coefficients

```

Min. 1st Qu. Median Mean 3rd Qu. Max.
1 1 1 1 1 1

```

| APN          | AD            | ADM           | FOM            |
|--------------|---------------|---------------|----------------|
| Min. :0.31   | Min. :12.66   | Min. :4.739   | Min. :0.5776   |
| 1st Qu.:0.31 | 1st Qu.:12.66 | 1st Qu.:4.739 | 1st Qu.:0.7176 |
| Median :0.31 | Median :12.66 | Median :4.739 | Median :0.7984 |
| Mean :0.31   | Mean :12.66   | Mean :4.739   | Mean :0.8010   |
| 3rd Qu.:0.31 | 3rd Qu.:12.66 | 3rd Qu.:4.739 | 3rd Qu.:0.8822 |
| Max. :0.31   | Max. :12.66   | Max. :4.739   | Max. :1.0121   |

*Removing sets of k genes*

```

Min. 1st Qu. Median Mean 3rd Qu. Max.
0.7812 0.9231 0.9615 0.9517 1.0000 1.0000

```

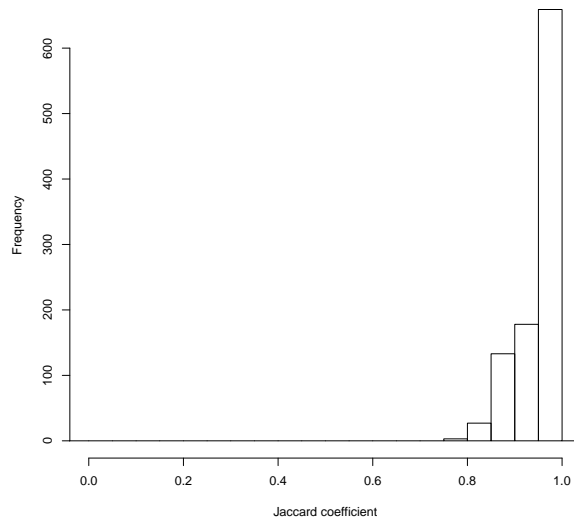

Figure 81: Removing two thirds of the genes: distribution of Jaccard coefficients

#### 10.4.6 Validation measures

Clustering Methods:

kmeans

Cluster sizes:

2 3 4 5 6

Validation Measures:

|        |              | 2       | 3       | 4       | 5       | 6       |
|--------|--------------|---------|---------|---------|---------|---------|
| kmeans | APN          | 0.0000  | 0.0722  | 0.0548  | 0.0730  | 0.1391  |
|        | AD           | 0.9436  | 0.9306  | 0.8485  | 0.8202  | 0.7896  |
|        | ADM          | 0.0000  | 0.9645  | 0.6306  | 0.7693  | 1.3773  |
|        | FOM          | 0.8010  | 0.7575  | 0.7290  | 0.7062  | 0.6943  |
|        | Connectivity | 43.6552 | 71.5976 | 67.5746 | 77.8921 | 77.0595 |
|        | Dunn         | 0.2697  | 0.2286  | 0.2697  | 0.2697  | 0.2697  |
|        | Silhouette   | 0.0641  | 0.0131  | 0.0532  | 0.0213  | 0.0236  |

Optimal Scores:

|              | Score   | Method | Clusters |
|--------------|---------|--------|----------|
| APN          | 0.0000  | kmeans | 2        |
| AD           | 0.7896  | kmeans | 6        |
| ADM          | 0.0000  | kmeans | 2        |
| FOM          | 0.6943  | kmeans | 6        |
| Connectivity | 43.6552 | kmeans | 2        |
| Dunn         | 0.2697  | kmeans | 2        |
| Silhouette   | 0.0641  | kmeans | 2        |
